# Supplementary material
Source: publisher site journal article supplement (https://www.spandidos-publications.com/6947/downloadSupplementary)
Supplement: Supplementary file 1 [file downloadSupplementary]

## Sheet: expression
Table SIII Grouping of leukemia patients based on genes related to anoikis
TCGA.AB.2949.03B	TCGA.AB.2943.03A	TCGA.AB.2851.03A	TCGA.AB.2822.03A	TCGA.AB.2939.03A	TCGA.AB.2931.03A	TCGA.AB.2921.03A	TCGA.AB.2937.03A	TCGA.AB.2917.03A	TCGA.AB.2849.03A	TCGA.AB.2990.03B	TCGA.AB.3007.03A	TCGA.AB.2948.03A	TCGA.AB.2971.03A	TCGA.AB.2955.03A	TCGA.AB.2892.03A	TCGA.AB.2898.03A	TCGA.AB.2857.03A	TCGA.AB.2995.03A	TCGA.AB.2928.03A	TCGA.AB.2913.03A	TCGA.AB.2866.03A	TCGA.AB.2927.03A	TCGA.AB.2870.03A	TCGA.AB.2956.03A	TCGA.AB.3002.03A	TCGA.AB.2834.03A	TCGA.AB.2875.03A	TCGA.AB.2901.03A	TCGA.AB.2858.03A	TCGA.AB.2853.03A	TCGA.AB.2846.03A	TCGA.AB.2994.03A	TCGA.AB.2977.03B	TCGA.AB.2991.03A	TCGA.AB.2886.03A	TCGA.AB.2806.03A	TCGA.AB.2873.03A	TCGA.AB.2885.03A	TCGA.AB.2876.03A	TCGA.AB.2999.03B	TCGA.AB.2982.03B	TCGA.AB.2815.03A	TCGA.AB.2810.03A	TCGA.AB.2941.03A	TCGA.AB.2896.03B	TCGA.AB.3009.03A	TCGA.AB.2859.03A	TCGA.AB.2934.03A	TCGA.AB.2919.03A
BRMS1	3.15947	3.69898	3.67722	2.95531	3.10985	3.40979	3.50213	3.46147	2.53013	2.32771	3.53522	3.17481	3.46336	3.36651	2.73465	3.08626	3.06908	2.93603	3.08262	3.11417	2.73536	3.5593	3.62131	3.33251	3.31726	3.15774	3.37367	2.92995	2.81095	3.1467	2.82329	3.20395	3.92997	4.32884	3.4496	3.07311	2.6097	3.23357	2.94626	2.92494	3.50045	3.4513	3.01475	4.17419	3.31725	3.10196	2.81567	3.15162	3.68341
PTK2	1.95008	2.12968	0.918247	0.84267	0.173423	0.0251345	0.156772	0.120686	0.94668	0.893764	0.160969	0.212663	0.573831	0.313326	0.113786	1.18737	0.688667	2.21836	2.14235	0.0595249	0.117821	0.238894	3.51206	1.29829	1.49057	2.37707	0.370242	0.268843	3.81417	1.44953	0.252526	0.430823	0.150521	0.154148	0.302169	0.391831	1.0247	0.813851	2.40458	0.233866	0.359895	0.808624	1.02286	0.0546437	3.47738	0.19052	0.206389	1.19875	0.825117
NTRK2	0.0265651	0.226067	0.00675238	0.0605952	0.0517553	0	0	0.0105797	0.00744318	0.160225	0.0166199	0.00454087	0.0432187	0.0285171	0.010384	0.0219524	0.130696	0.360741	0.405193	0.0107521	0.0327645	0.00473099	0.332173	0.0134054	0.014542	0.149911	0.179741	0.00216614	0.00490811	0.0810529	0.0115934	0.100037	0.0298867	0.0021511	0.0612591	0.012871	0.0180674	0.0375908	0.00827274	0.24605	0.0408966	0.536873	0.173142	0.00341265	0.00381614	0	0.172301	0.0365595	0.00434886
BCL2L11	1.87951	2.72285	3.24267	1.10214	1.24326	1.8446	2.77125	1.23305	1.96943	2.16712	1.51176	1.2734	3.04584	2.38714	1.34015	2.09672	2.04391	3.81413	2.53242	0.968159	1.77311	2.79538	1.99473	2.23331	2.47255	1.73933	2.20435	1.08183	3.0926	1.10517	2.18564	2.22315	2.11014	2.08722	1.27865	0.668361	1.23441	3.42003	1.52115	0.751407	1.68529	1.76437	2.82312	0.535135	3.72773	2.71815	1.49687	2.25627	2.81622
SRC	2.89855	1.75865	2.17006	0.485573	2.71391	3.85965	2.10002	1.86916	1.61481	2.00378	0.608212	0.522748	1.32923	2.30287	0.663305	2.28146	2.58802	2.47618	3.34316	3.38069	1.72338	3.50216	3.21691	3.15316	1.97275	3.00547	1.06284	0.71664	2.41243	0.339743	1.19345	2.43257	3.05048	3.45528	0.854375	0.679761	0.308068	1.66268	3.99916	0.605478	0.460131	0.766887	2.48458	1.8696	1.3883	2.65857	2.78149	3.66456	3.32477
CEACAM6	1.43794	1.14709	0.0444653	0.0889564	2.25473	0.037561	2.41403	2.07185	2.88002	0.494066	0.254915	1.30587	0.237012	0.0190891	0.0456256	1.65457	2.7257	4.50098	0.299895	0.421581	0.189651	0.0312756	0.0606254	1.2701	1.648	0.377871	5.69536	0.605316	0.125583	0.624698	0.0878753	1.19375	0.0714674	0.0284435	0.0844627	0.0563899	0.705412	0.178999	0.941745	1.93956	0.417618	0.184881	1.26445	2.09452	0.926959	0.147883	2.50281	0.378139	0.0569787
CAV1	0.237308	0.433907	0.159647	0.0886887	0.0516382	2.32482	0.167631	4.93471	2.25576	0.672839	0.784501	0.411692	0.368785	0.82115	0.0172258	0.151184	0.57795	1.13343	0.668057	1.49624	0.0672876	2.10764	1.15535	0.543916	0.18545	0.280856	0.487334	4.22821	2.70409	4.25429	0.028745	0.526331	1.15351	2.45444	0.48202	4.69197	0.4683	0.633611	1.10906	0.209023	1.10745	1.29672	0.31574	0.176265	1.93392	0.0128794	0.637941	0.596569	0.388167
AKT1	3.57757	3.24055	4.38651	3.81828	3.97753	4.93813	3.74544	4.20151	2.74542	3.08644	3.86862	3.69079	4.11172	3.84603	2.99241	3.47098	3.99603	3.69624	3.85795	3.84622	3.21409	4.47135	3.50539	4.34046	4.08655	3.68093	3.49218	4.14069	3.74011	3.95953	3.62883	3.83581	4.53715	4.09006	3.89923	4.35301	3.16817	3.96303	3.67796	3.35966	3.54917	3.7713	3.77498	3.92531	3.94026	4.04453	3.8499	3.89582	4.05813
ITGB1	4.91467	4.97429	4.42636	4.99516	4.80729	4.65077	4.14694	3.53953	4.93361	5.40007	4.24431	4.92068	4.39245	4.46066	4.01104	4.76469	4.34483	5.50595	4.71801	5.14769	4.20961	3.82806	4.4684	5.1839	4.6779	4.7744	4.12724	5.23181	6.04958	4.53383	4.66461	4.93109	4.89422	3.25132	4.95023	4.54306	5.05264	5.11117	4.92185	3.98582	4.08072	4.39003	5.24907	3.57908	4.53259	4.20624	5.32058	5.02817	4.24167
CEACAM5	0.011338	0.0117783	0	0.0135593	0.0124739	0	0	0.0312164	0.0292705	0.0692423	0.0246271	0	0.010393	0.0504618	0.0205008	0.0145349	0.033487	0.0131788	0	0.0127724	0	0	0	0.0132801	0	0.0454546	0.0134811	0.0255415	0	0	0.011485	0	0.0162256	0.0127385	0	0.0127507	0	0.0555091	0	0.0133377	0	0	0.0238328	0	0.0113115	0.0153324	0.0163878	0	0.0128859
BCL2	3.7573	4.14453	2.32452	4.42001	4.57987	3.6211	3.84987	2.82993	4.59367	5.61156	3.53034	3.64467	2.48836	2.99243	4.37081	3.44121	3.9717	3.84142	3.22061	4.23802	3.84951	2.28522	3.33564	3.93598	2.46405	4.14728	4.11882	2.82283	3.21472	2.32192	3.42854	3.44876	3.30557	2.63154	3.76643	2.75136	3.90987	2.01816	3.05179	3.75575	3.81255	3.53885	3.38615	2.9355	3.25858	3.70636	4.84737	3.55529	2.92383
CASP8	4.18206	4.34356	4.01779	4.08665	4.07404	4.78199	4.27693	4.25907	4.04795	4.22406	3.73567	3.58428	4.16222	4.43917	4.54469	3.75139	3.88059	4.13276	3.82072	4.04292	4.58664	3.90239	3.61506	4.13607	3.75221	3.865	3.78779	4.02947	4.09071	4.10938	4.60061	3.58968	4.4926	3.67292	3.73626	4.17142	4.34103	3.98538	4.368	4.81868	3.60784	3.56712	3.874	3.76524	4.05184	4.25378	3.79965	4.3588	4.13205
EGFR	0.0268281	0.0849788	0.00707166	0.0390776	0.0295003	0.00298386	0.00254249	0.00831736	0.0194092	0.139298	0.00327907	0	0.0541147	0.00902151	0.0216673	0.0191793	0.14473	0.180673	0.123045	0.00338717	0.0129579	0	0.0917873	0.00703592	0	0.0753069	0.0423349	0	0.0115401	0.0280472	0.00911501	0.0467033	0	0	0.0562408	0.00675484	0.0113806	0.0550322	0.00433834	0.0555862	0.0449139	0.398269	0.0376178	0.005358	0.0326469	0	0.092794	0.0144703	0.00341734
PTRH2	2.61779	2.68023	2.94068	3.02367	2.58251	2.69854	2.99185	2.30121	3.48059	3.16122	2.9532	2.9341	2.5249	3.10552	3.39176	3.59462	2.70592	3.17826	2.65883	2.91022	3.14622	3.05597	2.37285	2.85656	2.58765	2.9509	2.63963	2.88819	2.7144	3.07401	3.22994	2.93688	2.53775	2.40982	1.97633	3.2256	3.03474	2.82549	2.70613	2.91173	2.89683	2.84043	2.75205	2.19254	2.98413	3.01048	3.05871	2.97643	2.79897
STAT3	4.67069	3.98193	4.74851	4.97093	3.9199	4.94174	4.74868	4.96319	5.32158	5.59184	4.47111	4.47925	4.63095	4.81923	4.24709	4.305	5.07891	4.91693	4.86761	5.05046	4.32214	4.25943	4.60111	4.86728	4.25622	5.14079	4.94855	4.65224	5.04885	5.03456	4.50791	4.67286	4.98148	4.51632	4.84708	4.96393	4.57847	4.67264	5.07427	4.07982	4.64803	4.8795	4.59502	4.55783	4.44286	4.59071	4.52487	4.87741	5.09209
SIK1	0.0624783	0.142039	0.0371279	0.119126	0.314473	0	0.0915386	0.0648992	0.119328	0.132942	0.400442	0.0557713	0.0217761	0.242496	0.586648	0.270113	0.0581984	1.47632	0.0373698	0.363815	0.0564288	0.104727	0.662733	0.546347	0.00867559	0.410532	0.0558859	0.104533	0.146029	0.462097	0.0863041	0.0702153	0.0887451	0.0441749	0.346148	0.0528995	0.0520883	0.114385	0.572719	0.0821752	0.116208	1.36136	0.506363	0.0558623	0.0925206	0.0634341	0.301353	0.303317	0.202865
DAPK2	0.36061	0.340456	0.186529	0.0993634	1.0164	0.106862	0.300737	0.206828	0.273724	0.413199	0.179084	0.117545	0.478251	0.158945	0.918165	0.516727	1.74135	0.805981	0.531127	0.102804	0.290848	0.246981	0.807829	0.697282	1.22927	0.43773	1.19693	0.171049	0.396242	0.338027	0.177289	0.485999	0.27239	0.357557	0.165644	0.102634	0.205021	0.787136	0.952213	0.387993	0.110463	0.419224	0.59795	0.525379	0.988866	0.175145	0.992115	0.391711	0.340798
CTNNB1	5.39595	4.94844	4.95596	5.43027	5.43135	5.72031	5.25273	3.9759	5.34945	4.51547	5.301	5.09708	4.85377	5.68643	5.3584	4.83898	5.16902	5.28625	5.11712	5.57642	5.07276	5.40363	5.11838	5.41449	5.67991	5.81761	4.59847	5.54853	5.68923	5.19107	5.2928	5.48356	5.37139	4.51868	5.58118	5.46242	5.51303	5.86715	4.46395	4.95919	4.90904	5.07622	5.04918	5.16753	5.16253	5.4902	5.43801	5.18799	5.36096
ZNF304	2.03235	2.30701	1.33736	2.36411	1.94116	2.00362	2.22665	1.31481	2.75516	2.78935	2.08984	2.2679	1.93412	2.08001	2.30648	1.81	2.30595	2.31917	2.09143	1.98838	2.10092	1.49262	1.38952	2.12932	1.31233	1.59569	2.0905	2.07259	1.83169	2.01548	2.1716	1.41079	2.0801	1.26555	1.74312	2.25534	2.44294	0.82593	2.38338	2.01847	2.33333	2.27395	1.88236	1.2453	3.02885	1.86579	1.81641	2.01445	1.98345
MAPK1	4.62557	5.17742	4.53062	4.52055	4.30409	4.55677	4.31782	3.88006	4.70115	4.65633	3.8455	3.97924	4.57242	4.09814	4.51065	4.39622	4.5666	4.5028	4.20879	4.63402	4.35487	4.52277	4.18283	4.5426	4.36815	4.01452	4.83013	4.26668	5.34841	4.07411	4.51006	4.36621	4.41838	3.58401	3.77581	4.16099	4.38468	4.56623	4.81069	4.3236	3.74982	3.87166	4.58516	3.35495	3.9537	4.42937	4.44363	4.39763	4.51338
BMF	3.84189	2.81932	3.76224	3.52216	2.51439	2.7808	3.05799	3.90872	1.79707	3.36483	2.53804	2.73866	3.59316	3.17476	1.51314	3.33096	3.52375	1.62193	2.53798	2.87958	2.80521	3.2391	4.29944	4.30309	2.52228	4.18265	3.34125	2.91963	2.47861	2.96067	2.27521	3.58358	2.84436	3.5823	2.4235	3.32524	2.8658	2.88798	2.83475	2.6143	2.31998	2.7621	3.56983	2.24642	1.46079	3.16835	2.91842	2.7576	3.88228
ITGA5	5.26308	4.96815	5.80399	5.58422	5.20951	6.01598	5.23644	6.36909	4.86541	5.48381	4.6335	5.64223	5.11322	5.03934	3.8312	5.35213	5.03449	4.69511	4.75714	5.67011	4.79071	5.4795	4.2973	6.33459	5.2313	4.69074	4.81292	5.80244	5.47849	5.62022	5.18436	5.17599	6.58601	6.1942	6.02545	5.98505	6.08201	4.66755	6.19985	3.90339	5.35811	5.44892	5.53371	4.8027	5.00527	4.84714	5.77768	5.51138	5.64293
MCL1	8.24649	7.94252	8.28383	7.53621	8.83948	7.53208	7.99904	6.9598	7.4543	6.82824	8.66288	7.47471	7.71185	8.97034	6.26486	7.67816	7.82366	7.95848	7.54259	7.38854	6.86387	8.86932	8.5996	8.19417	8.98951	9.16223	6.95826	7.53804	8.27473	7.49218	7.26061	8.61944	8.16157	8.40911	7.62731	6.73449	8.99068	9.51656	6.97242	7.65288	8.03026	8.02513	8.31332	7.97936	6.72144	6.50911	7.04555	7.09658	8.36086
TP53	4.44546	4.6543	4.65246	4.95576	5.53548	5.37494	5.05796	5.53068	3.68724	4.0218	4.71473	4.86784	4.93766	4.60595	4.81284	4.99673	4.48219	2.38996	5.25244	4.92992	4.95312	4.85738	4.60012	5.20932	4.8499	4.38749	5.13376	5.25009	4.79235	5.07059	5.12578	4.92195	3.63115	4.5642	4.64668	4.99095	5.31796	4.14744	5.85536	5.01792	4.38206	4.5334	4.96618	4.79552	4.49316	5.16152	5.02376	4.7057	4.44134
BCL2L1	3.0517	5.28415	3.20105	2.89398	4.02576	4.64013	4.00286	4.99395	3.25384	4.51832	2.90964	4.39696	3.98721	2.72373	2.87718	2.78742	3.99038	5.64794	5.02161	2.95889	3.56614	3.08367	3.96571	3.17021	2.82065	3.42782	3.13962	4.33788	4.82086	4.82975	2.77436	2.69556	4.21883	4.29973	3.94414	4.09953	3.61758	3.58247	4.46643	2.7552	3.36483	3.45456	2.75886	3.05399	4.78537	3.80284	3.43485	3.85828	3.65782
CASP3	3.64777	4.15917	3.83148	4.3891	4.40714	6.79446	4.85932	4.88324	5.36019	5.03024	5.44307	5.10864	3.55232	5.0115	5.56351	4.40758	3.81892	5.68267	4.00732	3.42799	4.20469	3.78831	3.37196	4.47259	3.95195	3.38288	4.11071	5.36092	4.47613	5.39865	4.3161	3.93845	4.55349	4.15134	4.32224	5.75294	5.57974	4.05604	4.70512	5.34076	4.97343	4.77488	4.16264	4.03159	6.19751	5.06721	4.4195	4.03383	4.10797
CDH1	0.172365	2.37756	0.270477	0.428323	1.57275	0.055332	0.0575707	0.125636	1.73323	1.64477	0.539611	0.843994	1.55228	0.283536	0.0888225	0.272378	1.15757	3.48344	2.2688	0.0489682	0.234734	0.0611714	0.839876	0.269227	0.0407183	0.373937	0.723236	0.142767	0.10168	0.220038	0.0502771	0.129208	0.278919	0.0419631	0.389366	0.122508	0.0872127	1.93465	0.382194	0.239153	0.7946	1.20718	0.121368	0.0443645	0.847141	0.413433	0.172133	0.356436	0.478311
BAD	2.76053	3.31397	3.16664	2.41104	2.70523	3.2902	3.09352	2.95952	1.95525	1.85729	2.76591	3.04175	2.82892	2.52011	2.22481	2.80983	2.87487	3.12614	2.7043	2.71483	2.68003	3.02622	2.90308	2.83963	3.08841	2.86631	2.7373	2.63111	2.64649	2.92798	2.64211	2.43903	3.15299	3.98517	2.72767	2.64453	2.16532	2.44506	2.69198	2.44201	2.96747	2.87814	2.47958	3.58636	2.88644	2.90979	2.8862	3.05403	3.06668
PIK3CA	2.88347	2.68779	2.40616	3.10962	2.82743	2.7423	2.26283	2.25049	3.65691	3.81852	2.44957	2.50397	2.54602	2.78036	3.3042	2.8881	2.68831	3.19661	2.68079	2.99454	2.64429	2.45258	2.66633	2.73387	2.45283	2.81315	2.58498	2.91234	3.5087	2.79729	2.92139	2.75452	2.76321	1.58424	2.6234	3.19993	3.29709	2.60662	2.28017	3.01379	2.52513	2.52492	3.0648	1.71834	2.74467	2.30681	3.08788	2.62561	2.4579
PAK1	4.54846	4.65874	5.09137	3.43082	4.75314	3.04079	4.43904	3.25518	4.16815	4.71917	2.96317	3.35229	5.43354	4.19952	4.24885	4.649	4.41331	3.38105	3.56049	3.44312	2.99643	5.18383	4.71595	4.64018	4.9511	3.92325	5.663	2.89831	4.58082	3.35543	3.54607	4.3437	3.56549	3.99492	3.39233	3.5189	2.90492	4.59575	4.28109	4.52102	1.93572	2.28795	5.17796	2.43967	2.93279	4.12575	4.46278	3.05241	4.61648
ITGAV	2.82984	3.09167	1.24663	3.64941	2.58324	3.16473	1.70523	0.296503	3.3854	1.19685	2.15203	2.77976	2.45648	2.54031	0.989345	2.04785	3.21403	3.12671	3.18838	3.34073	2.78178	2.09167	2.04079	2.37261	1.85458	2.80756	2.45656	2.53871	3.61257	2.46778	3.03855	2.18002	2.95126	1.50356	2.63626	2.91622	2.9831	2.03759	3.29059	1.8819	2.58805	2.63584	2.83949	1.4221	3.62688	2.31513	3.56492	2.71485	2.07446
MAPK3	4.17199	3.96605	4.50502	2.79556	4.33637	3.60851	4.0337	4.22796	2.9922	3.23147	3.39359	3.34099	3.64118	3.50441	2.52543	3.4273	4.12752	3.67703	4.41063	4.20651	3.364	4.51748	4.12433	3.91658	3.72608	3.85496	3.68	3.71154	3.79101	3.47683	3.16882	3.40786	3.57534	5.01953	3.65943	4.07744	3.47697	3.67224	3.81943	2.88931	3.28111	3.6716	3.51165	3.80322	2.68684	3.77928	3.98631	3.8016	4.27341
PTGS2	3.09358	2.72523	4.86666	2.57558	3.69084	2.06456	1.86488	0.827919	3.77686	0.857579	2.07863	2.3031	2.5888	2.4929	1.13778	3.73466	3.73327	4.56995	2.25451	3.52359	1.53298	1.62082	2.77048	4.26673	3.4455	3.21787	2.18286	2.04816	2.8539	1.41467	0.885258	4.20396	2.56378	2.09023	3.12864	0.530526	3.26683	2.66089	3.60017	2.60525	3.51038	2.27824	3.5565	2.04301	3.70236	1.47429	0.142731	1.19499	2.88856
BAX	4.26315	3.61562	4.36601	4.24567	4.80924	4.5079	5.2054	4.37744	3.5677	3.88659	5.16116	4.04081	4.68008	4.47947	3.80753	3.80258	4.72628	3.54625	4.13876	5.04528	4.34349	4.76503	4.88849	4.56788	5.30766	4.31202	4.24814	4.72144	4.40132	4.22618	4.02353	4.27647	4.4446	5.64657	4.08299	4.50251	4.11416	4.6997	4.14837	3.80748	3.91971	4.26504	4.23109	5.03161	3.19732	4.69819	4.03306	3.93952	4.7252
FN1	0.713744	1.26095	0.914251	0.927851	0.943112	0.434881	0.733621	0.440478	1.5075	1.41648	1.00967	0.372659	1.49551	1.07275	1.37532	1.12835	1.1121	2.42797	1.4087	0.779146	1.07712	1.19547	0.749178	2.17471	5.01125	1.07754	0.872108	0.725802	0.361261	0.987469	0.745756	1.52282	0.453386	0.961692	0.681348	0.575369	1.21075	2.70235	0.994151	0.937488	0.47215	2.49315	1.1704	0.783547	0.693096	0.581878	1.02841	0.964034	1.72042
BCAR1	0.0335974	0.146786	0.0346197	0.0201993	0.0729484	0	0.0143033	0.0577273	0.043489	0.0873259	0.0767332	0.0250085	0.0868823	0.0253361	0.0153328	0.0847129	0.356713	0.708159	0.157368	0.0142957	0.0303149	0.0156851	0.232449	0.0246882	0.0229783	0.152529	0.10715	0.0238496	0.249776	0.0683467	0.0213624	0.0971998	0.0181581	0.0095208	0.137828	0.0330828	0.0160455	0.201739	0.0303571	0.0539972	0.0718105	0.563045	0.0870247	0.0594043	0.148889	0	0.12937	0.155599	0.00482356
PTEN	4.46077	3.70526	4.36895	4.33109	4.8125	4.19442	4.01692	4.45244	4.90824	5.37553	4.04371	3.89179	4.26321	4.71219	6.29985	4.77613	3.93718	4.37597	3.95764	4.10231	4.83852	3.86888	4.16355	4.00747	4.69101	3.53574	4.89359	4.6727	4.33345	4.7516	4.69883	4.34411	3.29841	3.46381	3.99938	4.92768	5.70147	5.11677	4.512	4.94043	4.40942	3.85515	4.78866	4.20301	3.25639	4.19013	4.6701	4.15058	4.00424
TLE1	0.998019	1.58394	1.60008	0.3226	2.18122	1.68247	0.830423	0.617879	0.653075	0.425821	3.20064	3.00123	1.77119	2.32015	1.18856	1.84603	0.382255	2.29545	1.92957	0.685777	0.577828	1.88995	1.78644	2.03781	2.87172	1.259	1.35633	1.05585	0.26915	0.362042	0.57644	1.92133	2.70856	0.556495	2.65789	0.416579	0.304955	2.55143	1.77346	1.09427	4.72161	3.90914	2.3156	3.10573	0.677305	0.627293	1.20186	0.945189	1.22698
PDK4	1.77001	1.90571	3.67603	0.74855	0.622783	0.192213	1.15661	0.358294	1.32163	1.75302	0.442488	0.182628	1.92842	2.29398	0.230942	1.76346	1.43307	2.42841	1.5152	0	0.21895	3.59525	0.736964	2.75166	2.73282	0.498283	0.637066	0.477888	0.523709	0.427458	0.262987	1.27634	0.899981	0.747683	0.33412	0.147544	0.0874149	5.04725	0.250998	0.420067	0.453392	1.11489	1.91769	0.16013	7.94906	0.482234	0.391538	1.19775	3.91454
ERBB2	0.769356	1.03779	0.834847	0.984023	1.27737	0.769429	0.686289	1.25727	0.831069	1.09484	1.13197	0.735961	0.802381	0.673321	0.57004	0.549763	1.1954	1.12357	1.10164	1.23203	0.901984	0.919203	0.934017	0.880561	0.446396	1.13093	0.451783	0.848338	1.05365	0.801286	0.430343	0.625771	0.544024	0.613446	0.591052	0.731247	0.624826	0.54174	1.26717	0.551435	0.734418	0.656386	0.677994	1.07225	0.47979	0.605351	0.779646	0.765034	0.599526
ANGPTL4	1.01701	1.4071	0.748441	1.07582	1.06404	0.643582	0.413154	1.22871	1.111	1.43116	1.0657	1.24536	0.814311	1.06857	0.8871	1.02453	1.87105	1.54236	1.25988	0.894702	1.22336	1.14579	1.73779	0.809926	0.97215	2.02266	1.16611	0.907088	1.17514	1.26107	0.538369	1.34145	0.976688	0.438309	1.12844	1.01225	0.478077	1.27578	1.72763	0.780683	0.932216	1.21659	1.11942	1.88023	1.52045	0.270793	1.43458	0.785598	0.717188
CYCS	4.32243	3.56153	3.82378	3.88455	3.13911	3.86917	4.07114	3.56207	3.95661	3.55344	4.32032	3.79976	3.61778	4.00852	3.9335	4.47364	3.14602	3.88383	3.53434	2.87777	3.83461	4.04981	4.32984	3.33102	4.88482	4.08684	4.40149	4.17028	3.67739	4.15595	4.60051	4.06103	3.414	3.66269	4.00477	3.97003	3.57279	3.91322	2.79994	4.34832	3.75903	4.06526	4.22407	4.75087	3.98898	4.09706	3.61044	3.71143	3.77717
BRAF	3.0098	3.48372	2.73686	3.60677	2.62941	3.28897	3.08586	2.84902	3.43687	3.98772	2.78924	2.47292	2.9211	3.39513	3.82279	3.18606	3.3527	2.7879	3.36645	2.81142	3.65533	2.74126	3.09581	2.78595	2.72654	3.43959	3.41937	3.13647	3.55336	2.96217	3.47363	3.08257	3.0734	2.48658	3.16517	3.29605	3.59815	2.81418	2.67724	3.41033	3.03468	3.17232	3.03453	2.67251	3.0045	3.18254	3.47804	3.42186	2.83564
ANXA5	4.4058	3.93996	5.76362	1.23524	0.594451	1.8086	1.81423	3.2209	5.37189	2.04656	2.67473	2.90806	6.31727	5.46149	0.929787	5.5668	3.71496	3.74456	3.79148	5.20939	0.78195	4.99283	5.36245	4.84421	6.13016	4.22206	3.0203	1.53904	4.053	1.95318	3.44156	5.88825	5.46242	5.22741	3.11742	1.21611	1.09885	6.15795	4.16748	1.69796	2.68318	3.90301	6.49388	2.76588	4.73712	4.47234	1.21151	3.69608	5.17772
BIRC5	2.33709	2.57395	1.16587	1.6992	2.63261	2.09687	2.03918	3.44496	3.38818	2.61808	3.39244	2.34495	3.0862	1.99406	1.58734	2.90372	2.96366	4.20331	3.25472	2.04907	2.7792	2.67013	3.1195	2.57881	2.87163	3.03487	4.09476	2.45504	2.70097	2.27597	2.37421	2.78166	1.98763	0.932022	2.44551	2.43737	2.35139	2.71689	2.04645	2.49719	1.9722	2.51179	3.85574	3.09322	2.6734	1.87097	2.31332	1.63913	1.21996
MTOR	3.45843	4.0011	3.84568	3.39754	4.10863	3.92263	3.58493	2.61789	3.65832	3.62382	3.63326	3.39849	3.84837	3.54226	4.13219	3.28847	3.51925	4.02755	3.78397	3.56955	3.76537	3.91474	3.50138	4.09955	4.31765	3.96054	3.68699	4.22483	3.80273	3.69824	3.55216	3.68829	3.99557	2.18194	3.4745	4.06285	3.73959	3.65556	4.1184	3.45855	2.89578	3.34161	3.65403	2.93008	4.21042	3.90482	3.93518	3.80948	3.7406
TIMP1	4.37877	5.18269	6.68908	2.25667	6.41071	6.0071	6.16253	7.19043	4.30052	4.80954	5.78309	6.611	6.21491	6.26827	4.18441	6.77637	4.61433	6.33139	4.30466	4.07685	4.24097	7.06668	5.65066	6.78225	6.13282	5.09229	4.96549	5.78517	4.5652	4.85422	4.40261	6.53568	8.13658	8.72084	6.93229	5.20633	2.60384	6.31027	5.42788	4.98571	6.92301	7.5015	6.1064	6.25706	7.02673	6.08564	6.29769	5.3066	6.359
ITGA2	1.04458	0.340608	0.190173	1.70383	0.358492	2.4811	1.04111	0.0136035	0.969929	0.195101	0.514779	0.128726	0.406721	1.59195	0.238494	0.254559	0.882988	0.358619	2.2251	2.13654	0.629461	0.183064	1.01025	0.469377	0.421198	1.58543	0.0290375	0.0493705	0.296423	0.122286	0.0730336	1.21704	0.252234	0.822325	0.176674	0.0703677	0.192503	0.317708	0.0626919	0.100857	0.127666	0.211959	0.565365	0.481596	0.659535	0.163908	1.98329	2.54792	1.13289
BDNF	0.11612	0.227174	0.0919722	0.0877298	0.267498	0.204825	0.187544	0.158574	0.229431	0.25279	0.105956	0.13688	0.111038	0.318285	0.510386	0.164805	0.135859	0.123484	0.371873	0.098757	0.892296	0.0610263	0.188548	0.108053	0.0904849	0.179173	0.0644842	0.186955	0.0570624	0.108456	0.112859	0.0773741	0.0704761	0.0056524	0.0865302	0.200777	0.114882	0.102714	0.111953	0.199124	0.179358	0.165175	0.0675341	0.112364	0.0639085	0.215112	0.112241	1.67175	0.232335
CSPG4	0.503207	0.166021	1.38587	0.483418	0.142836	1.20648	1.06872	0.53802	0.167127	0.761196	0.127629	0.183341	0.829324	0.720085	0.0420455	0.922593	0.368648	0.250503	0.557501	0.321812	0.178433	1.46197	0.0990954	2.15908	4.25509	0.212553	0.504898	0.217102	1.09372	0.25781	0.149261	0.994266	1.44366	0.164723	0.202813	0.269568	0.245775	0.474108	0.602115	0.0219822	0.334934	0.442162	1.0403	0.253348	0.377706	0.245435	0.669158	0.15609	0.553045
BSG	5.14541	5.83006	6.29991	5.12808	5.86791	6.30921	6.0056	6.64631	4.79817	5.13944	5.97583	7.13327	6.104	5.58597	4.52256	5.70586	6.11429	6.20281	5.93679	5.15993	5.32191	6.25559	5.61312	5.69381	6.51508	5.80024	5.71633	6.1956	5.63411	5.61002	5.30425	6.06677	6.80525	6.8736	7.04037	5.6031	5.6196	5.82136	5.30375	5.16915	6.16863	6.4925	5.31636	6.73603	5.74604	5.53571	6.64684	5.44632	5.79639
AKT2	3.52777	3.59864	3.63115	3.54479	3.91974	3.83111	3.70619	3.58379	3.21313	3.5389	3.51645	4.53298	3.48366	3.48768	3.1231	2.87771	3.94557	3.58736	3.61824	4.39439	3.38326	3.7769	3.67024	3.57654	3.56576	3.98463	3.28914	3.65019	3.45299	3.67013	3.12708	3.43749	3.97842	3.47282	4.40628	3.85682	3.24894	3.13068	3.75967	3.17163	3.91471	4.25909	3.06736	3.81264	3.34331	3.65295	3.66925	3.70053	4.02011
STK11	3.09752	3.25549	3.36351	3.06131	3.23678	3.55884	3.23257	3.33744	2.28001	2.53711	2.91409	2.93764	3.25289	2.7749	2.18138	2.65917	3.61358	3.54431	3.45691	3.10428	2.63804	3.24749	3.56061	3.24248	3.20763	2.89938	2.47529	3.66011	3.36987	3.39361	2.62742	2.98702	3.04567	3.48084	2.69944	3.8053	2.93505	3.17236	3.33045	2.22413	2.67842	2.79266	2.66689	2.92884	3.49081	2.90847	3.41153	3.17966	3.45495
IGF1	0.00481413	0.019903	0.011317	0.0229028	0.015835	0.128175	0	0.0330405	0	0.0703738	0.0260697	0.00571461	0.0131959	0.0287203	0.00872062	0	0	0.0975803	0.115347	0.0322468	0.0207118	0	0.034632	0.00564095	0	0.057527	0.0227711	0	0.00617658	0.0280939	0	0.0215739	0.00689617	0	0.0324595	0.00541549	0.00457071	0.0758853	0.00694676	0	0.0104074	0.0901739	0.0401577	0.00857766	0.0426608	0.0258868	0.0412963	0.0231219	0
IGF1R	4.27087	2.02304	0.828241	4.55248	3.59267	1.89198	1.24639	2.54047	3.85167	1.96725	2.50551	3.44066	3.62834	3.32676	0.793409	0.639003	4.70396	2.8582	3.41117	4.80477	1.64989	2.24808	3.24478	1.38341	1.38283	2.64371	1.92779	3.27185	3.186	3.30218	3.43518	0.465778	3.71389	1.23375	3.82192	3.72493	2.92296	1.95141	1.96492	1.36767	3.65166	3.84626	1.18232	2.32964	3.96518	3.41228	1.39091	3.17393	1.49117
ITGA6	5.62236	4.72165	2.95253	4.69343	2.2882	4.15711	3.99923	2.91862	4.55007	5.09694	2.79887	4.52636	2.552	3.06155	5.86436	3.63914	4.3454	4.63267	4.16723	5.32158	4.18786	3.30921	3.87272	4.73024	2.86111	2.9328	3.55791	4.15035	4.62383	2.99043	3.45787	4.1224	2.99337	3.15411	3.93309	4.54509	4.64703	2.68265	4.94274	5.15977	3.86524	4.01594	4.23115	2.22759	2.90477	2.8541	3.50186	4.84768	4.01345
ILK	1.76112	2.18487	2.33076	1.36137	1.45971	1.91563	1.6564	2.24568	1.25742	1.21705	1.26107	1.65798	1.82298	1.47172	1.40413	1.5615	1.94555	1.64183	1.64821	1.69146	1.20727	2.16183	1.46342	2.07072	2.24708	1.22833	1.5998	1.94643	1.88319	1.53999	1.34062	1.57755	2.36726	1.74619	1.86008	1.80956	1.4991	2.08738	1.94326	1.23931	1.44496	1.8136	1.58808	1.41947	1.26363	1.975	1.699	2.16594	1.96443
CFLAR	3.68524	3.77444	4.40085	4.01498	3.79884	3.75648	3.73511	3.4055	4.22921	3.81737	3.76052	3.87212	4.36596	4.31581	3.91488	3.95869	4.87242	4.02237	3.53618	3.8282	4.00845	3.87349	3.55658	3.89148	3.54217	3.07988	4.63455	3.78463	3.6741	3.89435	3.7706	4.13276	4.62237	3.44991	3.76221	3.92205	3.76047	4.61266	3.73802	3.64107	3.75133	3.99941	4.25088	3.27342	4.68813	3.72889	3.68406	3.80189	4.38395
RHOA	7.86756	7.29891	8.04762	7.28277	7.62715	7.65798	7.83376	8.23027	8.11449	7.24306	7.32489	7.04559	7.80701	7.45784	7.46804	8.13125	7.59631	7.39742	7.02687	7.78186	7.14068	8.12429	7.69094	7.77823	7.98834	7.92801	8.29631	7.57782	7.60318	7.72787	7.85911	7.81834	7.52767	8.37884	7.28112	7.30885	7.66267	7.9787	6.79043	7.88928	7.17238	7.14919	8.04987	7.89413	7.36967	7.622	7.39723	7.58189	7.55501
HIF1A	6.40205	5.12006	4.8741	5.16824	5.56617	4.7784	4.69134	4.57536	5.55234	5.07246	4.39855	4.24	4.72874	6.05671	5.32599	5.02738	5.2089	5.33818	4.5585	5.45608	4.66486	4.5995	5.66177	5.11429	5.14366	5.82617	4.97484	5.47145	5.57817	5.23251	4.74063	5.2939	4.63192	4.12626	5.29579	5.61409	5.81503	5.79834	5.15874	5.62808	4.40473	5.23367	5.18243	4.58571	5.93091	4.93836	5.29711	4.78732	5.00027
DAP3	4.57006	4.6053	4.11067	4.33583	4.01557	4.35178	4.53226	3.75785	4.40773	4.2184	4.50266	4.09688	4.24871	4.10182	4.21567	4.4398	3.98344	4.57652	4.53275	4.07755	4.30132	4.26858	4.34742	4.13359	4.23996	4.12666	4.47746	4.44981	4.07671	4.51369	4.62574	4.3325	3.97461	4.16515	4.14116	4.53401	4.5388	4.28737	4.0805	4.70941	4.40261	4.37566	4.21579	4.70194	4.80809	4.32051	4.10287	4.61518	4.11214
MYBBP1A	3.13468	3.49771	3.62167	3.64807	4.0255	3.90971	4.1223	4.08654	2.12689	1.74017	4.07359	3.88299	3.43925	3.63718	3.37059	3.39794	3.25605	3.46075	3.79304	4.04915	3.71595	3.81938	3.65756	4.07501	3.77403	4.07635	2.98213	4.80512	3.61653	4.17174	3.69534	3.84168	3.34007	2.92842	3.74097	4.58556	4.09671	3.14802	3.98935	2.939	3.16984	3.5665	3.09644	4.01229	3.91885	3.95794	4.55962	3.87737	3.7604
TLE5	5.44413	5.53417	5.47955	5.73361	5.24152	5.22798	5.33279	5.87571	5.33144	4.81872	5.18272	5.21009	5.07983	5.01576	3.56977	4.7008	5.29749	4.9211	5.38383	5.36883	4.74902	6.04972	5.79898	5.6668	5.56892	5.68507	4.67736	5.55864	5.03139	5.73198	4.83034	4.92774	5.68143	6.7133	5.5486	5.65676	4.9572	5.25162	5.52961	4.04979	5.27596	5.42493	4.80504	5.98055	4.78424	5.3155	5.39865	5.5921	5.31812
ITGA3	0.856589	0.608177	0.21311	0.216268	0.180844	0.153473	0.288739	1.61371	0.242055	2.12815	0.335444	1.1061	0.213131	0.330131	0.0356392	0.140956	0.30804	0.522268	0.643818	1.15153	0.499343	0.256375	0.919902	0.240014	0.3759	0.291311	0.0961385	0.3816	0.213241	0.467672	0.141906	0.165036	2.01858	1.44053	0.415932	0.231132	0.12994	0.198349	0.454542	0.0506193	0.322939	0.489977	0.0895538	0.179942	0.0922463	0.0887989	1.03572	0.439951	0.229552
PTK2B	5.51631	5.40634	5.82862	5.9753	5.98103	4.96003	5.25545	5.38262	5.21614	5.05541	4.46291	5.41335	5.92161	5.1191	5.315	5.27229	6.43881	5.41254	5.01301	5.92167	5.06092	5.85167	4.69392	5.81396	5.75698	4.88012	5.64684	5.45908	5.54174	5.08897	5.33238	5.61753	5.80961	5.8533	5.20384	5.48793	5.53616	5.95759	5.72293	5.26212	4.59961	5.0802	5.33175	4.67681	5.02502	5.30516	5.87961	5.66582	5.768
CCND1	1.80339	0.666555	0.228251	0.728057	0.434128	0.263044	0.215281	3.96989	1.56334	0.5463	0.220161	0.589803	0.193573	0.255291	0.242115	0.411849	0.502249	1.41486	0.892266	0.527602	0.376953	0.133478	3.39768	0.681197	1.00486	0.398194	0.628591	1.64254	0.601431	0.396238	0.0949535	0.353305	0.204677	0.635603	0.51268	3.23071	2.68121	0.248302	1.19727	0.244236	0.466597	0.83862	0.405897	0.238446	2.68664	0.174835	2.14654	1.08583	0.453231
CTTN	0.284315	1.56764	0.22029	0.217782	0.673644	0.0275902	0.144408	0.300834	0.474088	1.04383	0.312565	0.266914	1.05414	0.105744	0.268579	0.292369	1.0703	2.30866	1.50143	0.0679498	0.146103	0.10702	0.818363	0.219255	0.0422052	0.980499	0.553346	0.382736	0.984512	0.214362	0.0392555	0.275487	0.257212	0.0556848	0.326783	0.227359	0.170639	0.950925	0.714012	0.156368	0.446047	1.23793	0.259534	0.133771	1.76646	0.198484	0.319408	1.29698	0.914302
CALR	7.7129	7.7385	7.83303	7.9562	9.42866	8.38527	8.60802	9.18929	7.1321	7.41517	9.49154	10.923	7.79478	8.1172	8.1591	8.72523	8.21528	8.69883	7.57587	7.7411	7.98471	7.5158	7.48318	8.63088	8.46363	8.31518	8.36118	9.47786	8.02151	9.16935	8.35687	8.69828	10.0434	7.95416	10.8296	9.10217	8.64755	7.58494	7.38048	8.51988	9.97817	10.9562	8.30709	9.26346	6.95468	8.28959	9.2871	7.69227	7.85032
CDCP1	2.81388	2.30089	0.461336	0.103769	0.179626	0.76644	3.15748	1.08992	3.49691	0.259103	0.0948926	0.116172	1.92229	0.566611	2.63735	0.501662	2.81933	2.16465	3.99151	2.56121	0.147731	0.89398	1.98883	1.6018	0.786297	0.0788499	1.31489	0.658432	1.32406	0.178835	0.705954	0.147523	2.31035	3.47493	0.49285	1.39829	0.0721306	0.325382	1.88496	1.23547	0.112342	0.42727	0.447796	0.0421471	0.0643141	1.96447	0.100544	0.962534	2.69168
CHEK2	2.83743	3.80507	1.86882	3.02621	3.13166	1.95234	2.58246	2.3828	2.63136	2.26739	3.16816	2.73484	2.58337	2.23266	2.99714	2.84588	2.82564	3.077	3.3441	2.72511	2.66354	2.43521	2.63275	3.04862	2.91295	2.50296	3.47888	2.85492	3.01258	2.84732	2.8282	2.97611	2.22545	2.21366	2.63384	3.18104	2.94435	2.0351	2.38458	3.49064	2.59439	2.55111	3.27087	2.6032	2.09588	2.72503	2.8074	2.46637	2.32617
SKP2	3.32441	3.89437	2.76223	3.12207	4.14452	3.47505	3.68446	3.5938	3.85491	3.98291	3.81105	3.78819	3.66278	3.2426	3.76414	3.59616	3.65238	3.67518	3.75638	3.54686	4.1114	3.23298	2.69578	3.86374	3.79975	3.3736	4.03773	4.37851	3.81977	4.0437	4.15547	3.56802	3.03924	2.59368	2.82981	4.41917	4.11648	2.81412	4.0456	3.88019	3.23503	3.30405	3.80569	2.17606	3.56358	3.51679	4.3133	3.39702	3.24663
HGF	3.33749	2.75923	1.15551	2.5342	5.22799	2.44593	2.969	1.08136	2.66431	1.81009	3.89073	7.77746	3.19973	3.39031	3.49191	3.68802	1.87483	3.22771	1.89253	1.07921	2.50231	4.21861	4.12199	3.97333	2.13701	4.0842	0.235288	4.10559	4.22447	3.04994	0.559706	4.76723	8.01099	1.98085	6.82951	3.77423	6.72576	1.74039	2.29029	4.28894	7.04452	7.53762	4.15758	1.88304	0.507227	2.21702	5.21774	0.435568	2.45985
E2F1	3.70022	3.36009	2.05929	3.14916	3.80278	2.95098	3.34887	4.06979	3.08345	3.52164	4.98829	3.73169	4.20063	3.39468	2.59321	3.25572	3.73275	3.91941	3.72292	4.18092	2.69636	4.40885	3.88392	5.11559	4.21922	4.18613	4.06756	4.61943	4.91153	4.02331	3.08455	3.95928	4.51958	2.33062	3.95534	4.3028	3.62036	3.60179	3.92369	3.25637	2.56941	3.44606	3.72842	5.27231	3.82434	4.05727	3.19571	2.39705	2.95268
EGF	0.807348	1.3292	0.13586	0.402819	1.37982	0.275276	0.651579	0.118513	0.49247	1.39671	0.0343108	0.0150367	0.196024	0.0470828	0.526207	0.247132	0.979425	0.238291	1.58421	0.985177	0.197013	0.128016	1.38924	0.14198	0.0342855	2.81752	0.102313	0.464175	0.117621	0.0871789	0.105645	0.285395	0.122394	0.424576	0.0257658	0.0492779	0.534208	0.212904	2.06975	0.00747319	0.013721	0.0122299	0.140717	0.03367	0.156313	0.357035	0.115089	1.28967	1.01679
PIK3CG	3.92331	4.30861	4.1867	4.12729	3.60915	3.87575	4.0317	2.93611	4.16455	3.66708	3.02005	3.78838	4.22061	3.91396	4.50857	4.27482	3.93094	3.32227	3.95644	2.99952	4.02001	3.67403	4.16215	4.46621	4.62443	4.43835	4.80205	3.88522	3.82842	3.62818	3.88412	4.43316	3.56088	1.96351	4.01118	3.92663	4.54996	4.15322	3.70915	4.19292	3.02564	3.40909	4.73064	2.85063	2.75644	4.38464	4.44386	4.08943	3.6108
YAP1	0.00618066	0.169797	0.0501939	0.0220698	0.0924164	0	0.00522912	0.0588826	0.00802282	0.228016	0.0134531	0.113123	0.0391936	0.0548345	0	0.0158115	0.268378	0.510405	0.224048	0	0.00890429	0.00764293	0.297308	0.049944	0.0267621	0.104975	0.339877	0	0.0158142	0.0917613	0.0248824	0.114029	0.0350863	0	0.0978062	0.00695231	0.00586828	0.200899	0.0265867	0.145528	0.200118	0.582148	0.251376	0	0.0123062	0	0.103795	0.0800676	0
ITGB4	0.505679	0.422902	0.343081	0.452538	0.746441	0.110203	0.191586	3.58038	0.53783	1.02249	0.526644	1.3705	0.442581	0.261128	0.129978	0.785321	1.11116	1.68621	1.32905	0.434535	0.299374	0.465581	2.44398	0.568187	0.623398	0.777082	0.251314	2.39961	0.880987	3.35798	0.175815	0.576352	0.684829	0.281805	1.52778	3.76027	2.68939	0.425326	0.365882	0.231603	0.675847	0.979709	1.15034	0.657878	3.66661	0.31456	0.710854	0.404562	0.257602
DAPK1	5.05517	3.99138	3.52402	5.29155	4.31604	5.92435	4.51576	3.84951	4.45774	4.36162	1.77418	3.3672	2.89596	3.63871	3.29148	4.18397	4.29263	3.80335	5.75676	5.11507	4.82846	1.48851	5.26541	5.03607	3.55416	4.97428	2.46022	3.83387	6.48553	4.88639	3.9694	4.60039	3.67345	3.50243	2.85252	3.677	4.03708	3.93755	5.96249	0.953076	2.19718	2.04719	4.55878	2.09797	4.8891	5.13008	3.71889	4.08183	4.76989
PIK3R1	5.0071	4.38143	3.8794	4.77906	5.38687	4.51741	4.24399	3.44449	4.41469	5.15451	3.95046	4.21861	3.78708	4.75136	4.78202	3.98024	4.00842	3.78885	4.21123	4.58419	4.97032	3.83104	4.74431	3.97466	3.88596	5.40107	4.11854	4.99913	3.77881	4.61148	4.51756	4.27377	3.68583	2.8177	4.04419	4.8677	5.11263	4.07533	4.86294	4.54744	4.033	4.23514	4.13271	3.88225	3.34936	4.49292	4.72236	4.37202	3.72261
MAP2K1	3.47477	3.71353	4.56286	3.21937	3.34441	3.64391	3.61559	3.86653	3.82947	3.7074	3.27345	3.35236	4.45427	4.10704	3.20642	4.59038	4.02136	3.78711	3.34457	3.44785	2.94656	4.43861	3.92016	4.77376	4.83974	3.77916	4.54691	3.5875	3.85378	3.60307	3.2536	4.44525	4.26027	3.68277	3.66115	3.60471	3.48267	5.57428	4.29721	3.55363	3.23076	3.25304	4.99521	2.93704	4.99445	3.23472	3.73523	3.5351	4.56528
CXCL12	2.39783	5.12738	0.130034	3.59753	2.75434	0.0315062	0.0584991	1.52942	0.237687	4.61759	0.483317	0.117039	3.57081	1.18331	0.675416	1.78378	5.64834	5.77567	5.81435	0.170351	0.9582	0.11443	6.13649	1.26761	0.139913	4.04289	4.55195	0.22797	0.708195	4.00843	0.287815	4.01054	0.00916988	0.0496298	2.73342	0.892042	1.78802	3.13763	0.704407	4.03743	2.72407	5.69355	4.07559	0.0561373	0.818249	0.0512197	4.25142	2.6809	0.098705
LGALS3	2.82568	2.73025	5.64061	1.00881	1.21912	1.92977	3.88761	1.62977	3.53298	2.94032	2.18381	1.85245	4.84579	5.00388	0.956758	3.59354	2.80553	3.3159	3.17367	0.593016	1.08546	5.97061	3.34966	3.68734	5.09729	2.99993	3.68804	1.48534	1.69116	1.02499	2.01796	3.39653	5.83078	5.19004	2.81119	1.26044	1.25159	5.8983	1.33956	1.291	3.58691	3.82648	4.44519	2.41838	2.12561	1.98086	1.78627	1.87075	4.47977
BAK1	4.01807	3.344	4.42817	2.49848	3.35613	3.83875	3.92606	4.10664	3.14161	2.41285	3.521	3.21044	3.77475	3.66749	3.45902	3.6288	3.66599	3.36591	3.74616	3.615	3.65074	3.95128	3.60081	4.2698	4.44341	3.73636	3.3552	3.556	3.36919	3.38097	3.74856	3.94264	3.85335	4.23808	3.62414	3.49627	3.0865	4.21278	3.97911	3.43632	3.05636	3.48372	3.774	4.0821	3.39024	4.03472	3.94511	4.24795	3.93534
ABHD4	3.25412	3.06398	3.14653	4.02622	4.15362	4.00649	2.99777	3.75017	3.7677	3.57101	2.48765	4.37757	2.99538	2.56659	2.14841	4.40315	3.51315	2.5695	4.32277	3.94714	1.79929	1.8792	3.06798	4.4672	2.35207	3.11602	2.5587	5.10344	3.50454	3.56066	3.88018	3.92858	3.0959	3.17399	3.72425	5.98972	5.43716	2.57358	3.82748	2.51263	3.78468	4.38297	4.66897	2.66805	6.32085	3.43817	2.75501	3.90422	3.36306
CD44	6.85165	5.48807	6.29767	7.17927	6.89463	5.50799	6.47585	7.32565	5.80461	6.20633	6.22179	6.72239	6.34021	6.60949	6.96836	6.64185	6.19898	5.11411	5.35134	7.5977	6.37915	7.77133	6.10005	6.61993	5.5301	6.72655	4.97615	5.55964	5.76954	5.51685	5.60704	6.33176	6.73132	6.77504	7.89305	5.74395	5.68933	5.91168	6.05368	7.87611	6.75031	6.95343	6.32898	7.39073	4.65397	5.70103	6.12991	6.27508	6.23439
ITGA4	6.56105	5.79614	5.25366	5.50481	5.88895	5.66696	5.67078	4.90982	7.36942	6.56199	5.6205	5.63799	4.56073	6.52575	7.53021	5.36707	5.11979	6.0578	5.91019	5.94458	5.91219	4.80912	4.96335	5.87268	4.52164	5.17192	5.21115	6.60876	5.67952	5.39241	5.68539	5.43075	5.81634	3.22361	5.29587	6.43939	6.59703	4.586	6.00088	6.86888	6.09228	5.58071	5.59808	4.44634	6.02683	5.77858	6.87699	5.56433	5.26718
FADD	1.4268	2.73214	2.25942	1.8762	1.94872	2.15527	2.23284	2.94029	1.54901	1.68444	1.7937	2.27888	2.19923	1.4909	1.64646	2.23061	2.35271	2.17566	2.04753	1.78625	1.8832	2.55742	1.56394	2.42523	2.46733	1.4049	2.429	1.96045	2.55151	1.98337	1.67866	1.8404	2.24045	1.66087	1.15019	2.26788	1.91604	1.76931	2.38386	1.62017	1.74564	1.44799	2.11511	1.94683	1.76028	1.55999	1.83688	2.26208	2.24993
TGFB1	5.78362	5.84546	7.41674	6.13522	6.81726	7.06916	6.6526	6.52844	5.89556	5.57697	5.36852	4.67656	6.50668	5.99825	5.85525	6.27345	6.48486	6.27993	6.48044	6.54425	5.47004	7.18643	6.35873	6.84044	6.61367	6.80347	5.78986	5.59997	6.40427	4.80946	5.8848	6.13163	6.48413	7.93666	5.16518	5.27924	5.07192	6.85132	6.93509	6.05502	4.48135	4.6861	6.34306	6.55748	5.97586	6.292	6.13239	7.29484	7.14051
HMCN1	0.0146185	0.0514129	0.0220844	0.0125064	0.0676925	0.0103813	0.00354613	0.0288059	0.0243306	0.071448	0.00913157	0	0.0454387	0.0404635	0.03758	0.0213912	0.192698	0.26874	0.12851	0.0373635	0.0210335	0.00518445	0.0450595	0.0122488	0.00684899	0.0197336	0.029664	0.0942648	0	0.0365778	0.00848023	0.0257863	0.00600534	0.00235748	0.0450152	0.0326901	0.0334839	0.0612921	0.0120735	0.0123019	0.0491641	0.23151	0.011036	0.0111908	0.396625	0.011325	0.0241108	0.0449473	0.0330343
MMP2	3.19433	1.74227	3.03973	5.82357	0.625536	5.1272	3.09192	1.88019	0.569467	4.0386	3.78848	4.61327	2.27088	3.83215	0.0423899	3.22458	1.90615	2.27782	3.64623	3.80865	5.18553	0.200563	1.43971	3.23374	0.139548	0.724284	0.885668	1.98273	3.61847	1.71189	1.26233	3.98756	6.04079	4.78994	6.42585	1.33857	1.74249	0.515077	0.0885519	0.677978	4.73761	5.18673	2.71338	5.11556	0.379253	4.32858	2.35774	2.01408	2.73638
CDKN3	2.04306	2.37609	0.991756	1.10121	2.03955	1.70727	2.10425	1.76898	3.09005	2.51491	3.53827	2.54658	2.61509	2.01197	1.30381	3.03544	2.55725	3.59034	2.86147	1.42897	2.54084	2.52002	2.79849	1.92428	2.06287	2.87796	4.35988	1.58487	1.97424	1.7467	2.42488	2.27274	1.94455	1.22681	1.94351	1.76636	1.91358	2.35537	1.89581	2.27209	1.74153	2.41095	3.26915	2.41521	3.22159	1.82049	2.17547	1.93685	1.41002
CASP9	2.31643	2.04945	2.46797	2.28702	2.50753	2.4	2.65285	2.42965	1.76504	1.76181	2.0221	1.88697	2.08532	2.41573	2.18146	1.81626	1.97513	2.38365	2.01497	2.39544	2.42151	2.12982	2.10437	2.13662	2.69004	2.15987	1.96106	2.53809	2.20434	2.41031	2.46637	2.01051	2.27027	2.37157	1.74582	2.67608	2.04159	2.33599	2.01606	2.26987	2.22592	2.02109	1.98432	2.3506	2.28976	2.39086	2.27731	2.79469	2.47406
MTDH	5.4211	4.98218	5.24624	6.25089	5.38276	5.38556	5.4604	4.64669	5.81545	5.50275	5.07248	6.238	5.20087	5.12078	5.20333	5.51122	5.72387	5.73052	5.12616	5.37471	6.07285	5.11748	4.98533	5.11376	5.4843	5.37524	5.82032	5.44845	6.12441	5.22949	6.05709	5.58821	4.95983	4.0393	5.56881	5.23101	6.40235	5.33499	5.85622	5.8033	5.38621	5.16256	5.60505	5.52862	5.40808	5.3381	5.72505	5.53206	4.96208
TNFRSF10B	4.37442	3.3925	4.22304	3.99232	4.79208	3.72869	4.89771	4.09878	3.462	3.76333	4.46775	3.39602	5.24321	4.26108	2.4282	3.39923	5.17184	3.25942	4.02292	4.19425	3.86591	4.83373	4.02906	4.07759	5.02939	3.20265	3.52915	4.38718	4.66283	3.70035	4.01024	4.08326	3.17604	4.26719	3.0885	4.4681	4.14417	4.93534	4.33243	3.69346	2.32558	2.28183	3.79991	3.56627	3.82476	2.93537	4.48871	2.80149	4.30968
CXCL8	6.29946	3.21906	4.72639	3.10623	5.46725	3.81627	3.21006	2.7829	4.88498	3.36299	3.9088	0.523616	4.48708	2.35881	1.07015	6.3303	5.07123	5.81122	1.81686	5.68523	2.1071	3.82099	5.00147	2.04781	1.00781	7.53818	2.9641	3.93319	4.2261	4.14678	2.73019	5.07742	3.68097	6.75703	1.58046	3.1972	5.81697	4.43955	3.15872	7.34536	3.81818	2.12064	4.449	4.39802	2.89978	1.3202	1.67944	3.41117	2.29863
MIR200C	0.581085	0	0	0	0	0	0.274696	0.426267	0.402838	0	0	0	0	0	0	0.398641	0	0	0	0	0.441064	0	0.926966	0	0	0	0	0.35694	0	0	0	0.355525	0.438819	0.354741	0	0	0.770858	0	0	0	0	0.564165	0	0	0	0	0.442618	0	0
AR	1.70571	0.00948367	0.0598741	3.35017	0.0397641	0.0359145	0.00515435	0.140981	0.384118	0.048629	0.0651199	1.9863	0.622011	0.135725	0.011032	1.63564	1.54324	0.533964	2.29842	1.95192	0.456539	0.150493	1.36106	2.15129	0.0296463	0.00823253	0.0674139	0.144546	1.80459	0.0803314	0.0184357	2.7968	1.90381	1.14755	2.42885	0.274413	0.285642	0.037451	2.46442	0.0319844	2.06927	2.62313	1.84524	0.105006	0.14476	0.0881916	0.0262789	0.116864	0.352416
CDKN2A	1.18113	0.272145	2.22813	0.871469	1.70532	1.60965	1.84306	0.0124333	0.101641	0.498195	1.02057	1.19541	2.17597	2.60412	1.29264	0.204465	0.312199	1.27273	0.280632	0.0693764	0.216703	1.92762	0.702963	0.206256	2.62775	0.214664	0.358773	0.260509	1.00712	1.23828	0.566306	0.515222	1.86415	0.53526	1.98805	0.24204	1.08027	2.05073	0.194426	2.16719	0.935789	1.57922	1.2048	0.195121	4.70727	0.550959	1.06623	0.388857	0.780003
MAPK8	3.48126	1.88672	2.56903	3.4031	3.2521	3.37076	2.75142	2.31524	4.15366	4.06616	3.33756	3.17099	2.59807	3.52137	3.49645	2.3515	2.62571	3.13379	3.09196	3.01452	3.52568	2.4414	3.10845	2.61733	2.59546	2.85618	2.7996	2.80327	3.6395	2.72865	3.50189	2.65866	2.97402	2.53279	2.51222	3.03588	3.44598	2.40751	3.27004	2.98849	2.8857	2.86681	2.60454	2.65508	2.48074	3.24389	3.25948	2.85834	2.58547
PIK3CB	2.97755	2.94169	3.92463	3.08826	3.48427	4.85339	3.75857	3.10253	4.11663	4.02407	3.24538	4.51362	3.30762	4.11242	4.37807	4.23576	4.19174	4.52629	3.91487	3.195	4.27073	3.54917	2.79844	3.56419	4.02897	2.85779	4.65856	3.57501	4.67392	3.12939	4.3753	4.05131	5.07096	2.72855	4.54354	3.19219	3.78777	3.99931	2.96941	3.97661	4.55954	4.46227	4.25697	3.02586	4.48799	4.15952	4.04708	4.42158	3.39436
CLDN1	0	0	0.0124875	0	0.0116701	0	0	0	0.0273945	0.0262955	0.0115692	0	0	0.0159225	0.0191832	0	0	0	0.0125696	0	0	0	0	0.0124246	0.235113	0	0	0	0	0	0	0.0119473	0	0.0119177	0.0287025	0	0.0100718	0.013172	0	0	0	0.0203986	0	0.0188698	0	0	0	0	0
MIR26A1	2.05638	0.448622	0	0	0.825983	0.431354	0.672477	0.572027	0.935035	0.523571	0	2.36972	0	0	0	1.23364	2.86176	1.39682	2.11445	1.36884	0.590933	0	1.18639	0.866245	0	0	0	0.482707	1.70179	0	1.27648	0.840904	1.59117	0.479854	0.967844	1.36733	0	0	0	0	0	0	0	0	0.765914	0.561088	1.60082	0.510152	0.846693
MIR204	0	0	0	0	0	0	0	0	0	0	0	0	0	0	0	0	0	0	0	0	0	0	0	0	0	0	0	0	0	0	0	0	0	0	0	0	0	0	0	0	0	0	0	0	0	0	0	0	0
CDKN1B	4.26543	4.44634	3.43734	3.86369	4.5304	3.75242	3.89794	3.67467	4.4803	4.15106	4.03487	3.37654	3.5611	3.91093	3.3617	3.66248	3.74492	3.90178	3.79193	3.81462	4.49408	3.18994	4.71072	3.51133	2.06595	3.57884	4.5536	3.30161	3.37242	2.87278	4.21892	3.15723	3.37101	3.77504	2.511	3.28263	3.75658	3.56273	3.83963	3.65828	4.05408	4.16073	4.00023	2.9302	2.77248	3.44925	3.37246	3.86282	3.97536
ATF4	7.60621	7.18111	6.57366	6.69775	6.48162	6.81789	6.89911	7.28184	6.29812	5.92358	7.11535	7.12146	6.61601	6.96044	6.32593	6.497	6.21994	6.8318	6.56432	7.33806	6.44045	7.01209	7.27395	6.34029	7.19001	6.95497	6.1213	6.69486	6.73226	6.96745	6.51469	6.95762	7.15288	7.65123	7.87169	6.54145	6.94586	6.88135	6.40356	7.06693	7.53545	7.50486	5.92739	8.31276	6.44591	7.0156	6.81955	6.96129	6.5687
KLF12	0.337126	3.1094	0.644122	0.628085	0.834576	0.356915	0.677967	0.368	4.22231	4.18125	0.875811	1.13442	1.40508	1.86653	3.34431	0.709299	1.15446	2.58379	3.1205	3.28168	0.587475	1.01813	1.81988	0.652017	1.25529	2.10854	0.383527	1.40141	1.10104	0.913266	0.495565	0.506129	1.56226	0.383074	1.80003	0.972759	0.660655	1.33388	1.07154	0.570374	2.33611	2.43609	0.254553	0.209824	2.99134	0.505062	3.30287	1.91965	1.67212
MYC	5.70739	5.37678	5.09286	6.06926	6.24049	5.72417	7.18576	6.64364	4.54146	3.17055	5.90841	7.07626	4.5439	3.92305	5.48605	5.94179	5.08695	6.71278	5.63594	7.06957	6.67261	5.46576	4.26474	6.42283	3.50966	4.91165	5.01279	7.02807	6.22405	6.53984	6.25713	5.6597	4.95575	4.75274	4.94889	7.0908	7.48594	3.48528	6.02368	6.20226	6.148	6.10621	4.92005	4.148	5.90933	6.50302	6.02459	5.46204	5.59546
PLAU	3.43109	2.51413	1.69832	2.07116	3.11513	3.22083	4.08047	3.83905	1.82657	3.47777	2.86955	2.36936	2.2206	1.64888	2.12896	2.57309	3.34918	3.14814	2.21074	2.669	3.00054	3.18316	1.16559	2.62931	1.82271	0.519729	2.6197	3.17106	3.77017	3.2158	2.71574	2.69202	4.24657	2.49439	1.65342	3.53456	2.77702	1.1717	2.37698	2.41289	2.58533	2.67645	2.58742	2.58552	0.552095	3.63552	3.4371	2.47555	2.23233
PLK1	1.24401	2.8993	1.63255	2.14804	3.31834	2.02389	1.6627	3.798	2.48989	2.15502	4.08937	2.9778	3.08368	1.90357	1.5792	3.69919	3.2584	4.17687	3.50634	1.84227	3.1395	2.83603	3.43431	2.13352	1.63172	3.29624	4.50229	2.97545	2.4022	2.58284	2.33952	3.16462	2.5388	1.84975	2.66507	2.95486	2.6177	2.28747	2.07257	2.36495	1.85598	2.63089	4.02393	2.69848	3.13771	1.25815	3.30093	2.39731	1.8541
SMAD4	3.28996	3.01312	2.77618	3.64362	3.26083	3.31444	2.95658	2.80593	3.81888	4.01081	3.15008	3.049	2.94143	3.20206	3.53278	2.92315	3.27195	3.16444	3.25534	3.45471	3.40518	2.77473	3.11863	2.91783	2.65634	3.25402	3.33213	3.05272	3.38792	2.9069	3.52484	2.90583	3.02079	2.32553	2.6038	3.12545	3.62066	2.58188	2.62587	3.32379	3.30398	3.10294	3.12412	2.3735	3.47943	3.29857	3.43737	3.20613	2.67993
CDKN1A	4.08945	1.71123	4.84343	1.28211	4.85918	3.93185	6.13046	5.49985	2.4984	2.79083	2.35321	2.37528	4.19363	3.61459	0.583376	3.72791	2.24259	2.73309	1.92828	3.24647	1.39826	4.34483	5.6706	4.9686	6.27265	4.57984	2.12217	5.70937	3.79942	4.5361	1.79821	3.44057	4.57317	5.23384	4.40018	4.79772	4.38008	6.32336	3.16149	1.24288	2.41382	3.85048	4.46875	2.93074	3.7022	3.21428	3.08427	2.15675	4.46617
MUC1	0.74519	1.36614	0.872116	0.440039	0.848799	1.3903	1.81369	2.16835	1.52764	1.37044	1.81288	1.93503	1.07227	1.13046	0.221956	0.549255	1.67045	2.31394	1.92588	2.43252	1.59278	1.59822	0.874255	1.00539	2.07641	1.50021	0.665766	1.37972	1.46363	1.71917	1.48819	1.22048	2.12427	2.05531	1.92043	1.77581	1.08823	1.09253	1.33965	0.359889	1.5722	1.63787	0.777185	0.886406	3.2875	0.983876	0.966571	1.33933	1.30608
PLAUR	3.45953	2.11339	4.63302	1.60735	3.57697	2.84706	3.52096	2.00347	2.97186	2.32801	3.01558	2.63046	4.21899	4.42159	0.375208	3.16139	3.47943	3.21433	1.24709	2.3314	2.01247	3.44586	3.94765	3.28442	4.35796	4.18443	3.99114	2.29459	2.22959	2.33923	2.33942	3.58616	5.61801	4.52778	5.56247	2.51653	2.31237	5.55704	2.48714	2.75887	4.32018	4.93916	3.31467	4.51863	2.70846	2.77211	2.14559	2.07128	3.45034
LGALS1	5.50055	5.49693	7.74981	2.36475	5.88096	7.01906	7.84738	7.10341	5.22078	2.99802	6.14785	5.99793	7.9754	6.85935	5.07669	7.55214	4.34526	4.88927	2.83876	7.10008	5.07473	8.83834	7.41851	7.32077	8.22892	6.40175	7.58689	4.83182	6.96045	4.05298	6.42439	6.26675	8.82318	9.21883	4.7179	3.37208	1.79705	7.60075	6.39848	4.6085	4.06318	4.9606	6.84194	7.74824	4.16045	7.83639	5.76321	5.87427	6.95848
PYCARD	4.01789	3.54672	5.64556	3.1102	4.37671	4.86027	5.49942	5.15854	3.14783	2.30888	4.83935	3.68101	5.26193	4.21127	3.34354	4.30569	4.00137	2.86099	3.12098	3.71009	3.24004	5.90865	4.80986	3.98547	5.58709	3.74307	4.83764	4.42271	3.41006	4.21551	3.94872	3.97337	4.40934	6.94095	3.5127	3.9797	3.24751	4.93699	3.6456	3.89989	3.52632	3.80743	4.17045	5.20839	2.47565	5.26212	3.6218	4.35532	5.08017
SESN2	2.03285	2.61065	2.23205	1.56011	3.16089	2.68181	2.98647	2.41109	1.79948	2.87224	3.02962	2.5963	2.24626	2.0092	0.911022	1.32596	3.31256	2.77321	2.54047	2.52053	1.68371	1.93661	2.93863	2.40686	3.43267	1.44092	2.13747	2.28983	3.24501	1.61937	1.53765	1.88037	2.51429	2.08644	3.25679	1.4282	2.03528	3.54397	2.6084	1.06171	2.45547	2.39501	1.9575	2.93506	4.41579	2.28056	2.72726	2.04982	2.52444
NTRK1	0.514168	1.01341	0.268658	0.83774	0.495478	3.41238	0.144002	1.62771	0.496782	0.687926	0.546358	0.23492	0.302336	0.14098	0.580402	2.21892	0.61011	2.49959	0.627166	2.08107	0.135445	0.096392	0.602845	2.65751	0.0097276	0.417554	0.0625402	2.00984	4.10846	3.36586	0.104919	1.44742	2.55671	1.34174	0.78085	1.66512	0.971037	0.282093	2.60001	0.377959	2.09975	0.599216	1.11936	0.495312	5.56475	1.30484	0.0879985	0.419465	0.6522
KRAS	3.69482	3.45691	3.55187	3.85927	3.63273	4.05567	3.65713	3.27074	4.75991	4.52831	3.32291	3.02007	3.20199	3.71488	3.73424	3.50851	3.62238	3.58815	3.25898	4.33215	3.79946	3.56401	3.42799	3.29967	3.42745	3.99981	3.83062	3.44201	4.03857	3.31733	4.1632	3.69966	3.75967	3.25441	3.29797	3.66862	4.02692	3.37787	3.02629	3.63984	3.48637	3.52184	3.69264	3.06075	3.02482	3.79371	3.73985	4.05915	3.21347
ITGB3	0.78735	2.71666	1.87171	0.170137	0.686492	0.142505	0.260279	0.151671	0.408825	2.61026	0.296553	0.0719447	1.17806	0.10301	0.303731	0.120147	0.339695	1.95203	3.28489	0.0588025	0.988904	0.314466	1.21819	0.148159	0.181597	2.04251	0.942845	0.322714	0.343099	0.257532	0.224359	0.264277	1.57734	0.0490381	0.303949	0.14251	0.336634	1.69953	2.47896	0.367003	0.0565485	0.476883	0.116921	0.374434	2.82542	2.07573	0.351769	5.50182	3.41515
BID	4.29532	4.08375	4.4533	3.38875	3.70688	4.0679	4.22806	3.12984	3.67428	3.40707	3.95488	3.12747	4.11792	4.02165	3.84239	3.7237	3.41576	3.69021	3.06987	3.09383	3.91625	4.05773	3.26233	3.59891	3.96738	3.77982	3.92335	3.29712	3.77581	3.33516	3.78189	3.44805	3.46924	3.7335	3.43307	3.56172	3.70998	3.84779	3.40784	3.81222	3.23497	3.25588	3.697	4.48198	2.45161	4.24587	4.15207	3.72679	3.73625
THBS1	3.94189	1.87621	2.6351	0.154509	1.55871	4.83568	1.32642	0.768688	0.439931	1.98193	0.58725	0.296087	1.69456	2.42434	0.470389	0.443463	0.659747	2.4587	3.28335	0.294211	1.56664	1.15982	3.66102	0.743819	4.83114	1.53403	1.12437	2.24446	1.64057	3.22532	0.528592	1.61455	0.989763	1.50996	0.684204	0.65796	0.160518	8.79855	2.16148	1.86971	0.350397	1.58181	1.27916	0.205031	4.39717	2.22565	0.766285	5.73291	5.09738
HRAS	2.63002	3.83489	2.93488	2.83285	2.83711	2.79374	3.24545	2.23217	1.72698	2.54433	3.1676	3.50496	2.768	2.38729	1.82328	2.33924	3.97167	2.57738	2.96246	3.69996	2.07612	3.25823	3.13862	2.76768	3.64665	3.0488	2.5715	2.72489	3.34095	2.54961	2.09721	2.61107	3.86021	4.16821	3.23824	2.98298	2.12546	2.78817	3.75553	1.8787	3.44631	3.28534	2.09697	3.42684	2.71289	2.72403	3.06115	2.51196	3.2884
CDK11B	3.41706	3.5737	3.41289	3.23068	2.93273	3.09801	3.11944	2.68639	3.26096	2.97121	3.45516	3.27674	3.11269	3.46851	2.83271	3.06893	3.23782	3.47965	3.32913	3.40612	2.95429	3.88359	3.53003	3.55244	3.42747	3.36108	3.45736	3.20245	3.42148	3.03012	2.94286	3.28215	3.76529	3.61842	4.0041	3.11855	2.36963	3.56494	3.52722	2.90933	3.37029	3.53183	3.23388	3.843	4.29718	3.55551	3.41328	3.12471	3.62904
CDK11A	2.08898	2.64002	2.27118	2.05137	2.01805	2.02134	1.40258	1.28845	1.84162	1.36545	2.407	2.19891	1.48102	2.41242	1.19744	1.83215	0.118452	2.60313	2.06731	2.02108	2.03016	2.7175	2.74224	2.31702	2.21288	2.2378	2.00376	2.10429	2.19291	2.15174	1.75305	2.29298	2.59563	2.56684	2.75409	2.27202	0.991344	2.46755	2.10034	1.73779	2.23237	2.06884	1.32496	2.66788	3.02537	2.21539	2.40036	1.95993	1.95248
XIAP	2.76076	2.94192	2.81713	3.54536	2.87495	2.83411	2.72485	3.20157	3.66388	3.46189	2.52556	2.77767	2.74544	3.03127	3.12882	3.09841	2.94219	2.9083	3.01153	2.79449	3.09075	2.66526	2.73323	2.93259	2.4974	2.73074	3.59029	3.04173	3.27515	2.78645	3.3379	2.79497	3.02657	2.22645	2.49898	3.14599	3.42359	2.79985	3.32574	2.91193	2.92743	2.61776	3.37139	2.07614	3.16257	2.54163	2.80328	3.08484	2.75686
PPARG	0.40128	0.523366	1.26831	0.142671	1.68074	0.0562977	0.358982	0.013299	0.120055	0.560323	0.140189	1.92311	0.438374	0.6064	0.0173782	0.0605602	2.07428	0.745048	0.31683	0.0741064	0.081072	1.32443	0.594443	0.0554073	3.02857	0.473509	0.751602	0.0429933	0.207094	0.150626	0.0289982	0.173746	2.73761	0.220595	3.01215	0.0427392	0.0800876	3.96175	0.0275717	0.296398	3.02528	3.42575	0.135838	0.131397	0.254944	0.0512861	0.255159	0.112006	1.00202
IL6	0.0734889	0.183633	0.022035	0	0	0.0369456	0.0158537	0.0513296	0.117491	0.0462322	0.118395	0	0.0341362	0.082625	0	0.0936521	0.108048	0.685102	0.0867419	0	0.0269268	0.0459006	0.288748	0.0435203	0	0.212887	0.065761	0.0626259	0.0475939	0.0650429	0.0189683	0.0825509	0.0267694	0.160255	0.122922	0.0210527	0.0353506	0.134128	0.0794267	0	0.327327	0.203215	0.039253	0	0.34904	0.0253007	0	0.0448474	0.181046
MIR145	0	0	0	0	0	0	0	0	0	0	0	0	0	0	0	0	0	0	0	0	0	0	0	0	0	0	0	0	0	0	0	0	0	0	0	0	0	0	0	0	0	0	0	0	0	0	0	0	0
CCR7	1.70634	4.46652	3.18595	1.58467	0.945051	1.39891	3.25141	1.95731	1.531	3.10704	2.24114	2.57974	2.31904	3.03217	1.08021	2.15641	3.07761	4.26786	3.90638	1.20149	1.67419	2.36373	3.88889	3.34282	3.32375	2.99135	1.64564	3.05232	0.428531	3.48325	1.34451	2.51408	3.74818	3.11179	2.1293	3.34248	1.99556	2.99383	2.14027	1.41255	3.07246	3.59017	1.71166	0.603283	2.40919	1.7123	2.82499	5.01502	3.53315
MSLN	0.292881	0.200154	1.0431	0.150827	0.370473	0.204582	0.187071	1.24833	0.162985	0.221275	0.316821	0.285314	0.153811	0.187107	0.152314	5.52721	0.765857	0.146783	0.226327	0.603035	0.141793	0.437682	0.200045	3.69952	0.521078	0.542578	1.10872	0.62696	1.01747	0.794374	0.602376	6.14939	0.233886	0.557309	0.257033	1.5753	1.10825	0.236377	0.323271	0.132711	0.180106	0.283529	5.44429	0.44897	0.166697	0.0778161	0.306872	1.17699	0.260363
RAC1	5.09749	5.10798	6.02834	5.59926	5.37433	5.43235	5.46901	6.23597	5.40794	4.97267	5.11163	5.03734	5.44715	5.44094	4.87566	6.0219	5.3848	4.99385	5.14486	4.70405	4.96136	5.49322	5.8248	5.62609	5.62112	6.30553	6.12131	5.35028	5.88062	5.48099	5.40267	5.81521	5.89986	5.80565	5.56175	5.39769	4.84821	6.07041	4.66208	5.08423	5.5263	5.46319	6.05182	6.20499	5.0624	5.38708	5.59043	5.26242	5.60278
GRHL2	0.00642082	0.033049	0.0953317	0.0380043	0	0.0190391	0.0108444	0.160245	0.307475	0.100666	0.0278149	0.0525208	0.017583	0.0662017	0.0231587	0.103557	0.0284474	0.108116	0.0743598	0.0215963	0.115857	0.0392689	0.133913	0.0298589	0.0139641	0.0596648	0.0673196	0.0848645	0.0487291	0.0225381	0.0575085	0.0287187	0	0.0427614	0.00873507	0.0979642	0.0830899	0.0394475	0.090057	0.0150718	0.0344329	0.0123645	0.0728507	0.0340379	0.0127833	0.0173243	0.0902909	0.0977052	0.00729911
NOTCH1	4.8731	5.36586	5.07981	4.30923	5.1426	4.92334	4.37853	4.19355	4.15565	5.9565	4.10408	3.95981	4.47246	4.18771	4.17684	3.69825	5.24133	4.54188	5.09642	5.34415	4.49499	4.27397	4.62225	5.00516	3.96714	5.80584	3.95206	4.32522	4.52586	4.05141	3.33295	4.43753	4.84104	4.2232	4.47531	4.41786	3.39424	3.8758	6.05734	2.96683	3.50649	3.58776	3.77533	4.28463	3.6638	4.57311	4.60622	4.61096	5.02594
RHOG	6.19801	6.42961	7.35917	6.01741	6.94612	6.44094	6.69123	7.02629	5.45977	4.60345	5.96846	6.10236	7.27907	5.83356	5.77733	6.64626	6.69012	6.19261	5.59738	6.62855	4.86766	7.39495	6.42022	6.73375	6.74668	6.04045	6.61626	6.45549	6.46953	6.42252	5.69447	6.5773	7.02176	8.35259	6.26526	6.18182	5.77003	7.21679	6.18549	5.98009	5.80187	6.19743	6.4897	6.89538	5.44474	6.7535	5.87576	6.22699	6.76675
CCAR2	3.73684	3.79825	4.08909	4.67067	3.88538	4.054	3.76918	4.02219	3.82095	3.69903	3.8878	4.54994	3.87851	4.01839	3.40465	3.81416	4.53491	4.07629	4.11487	3.91468	4.26758	4.21179	4.03702	3.91326	3.79555	4.46829	3.97529	3.90882	4.40346	3.96462	3.65823	3.7542	4.27327	4.18669	4.32384	3.97221	3.61448	3.7756	4.39606	3.33517	3.77913	3.86975	3.64966	5.12207	4.03623	3.91117	4.14763	4.09691	3.87438
NQO1	1.02152	0.950191	1.50577	1.58417	1.18323	2.28567	1.61615	2.38568	1.33419	1.27402	1.03658	1.53299	1.0252	1.20897	1.14107	2.18928	1.07901	1.22835	1.26821	1.29348	1.76881	1.25547	1.54701	1.88634	1.50972	1.33142	1.37373	1.41885	2.09901	1.4592	1.99847	1.65672	1.52083	1.1096	1.23013	1.47777	0.888856	1.06656	1.76517	1.13292	1.55741	1.14942	2.04015	1.10834	0.726574	1.85191	1.48757	1.79466	0.827473
BIRC3	2.36635	4.2087	2.96	1.9476	1.69767	2.15547	2.44353	1.28118	2.97887	3.33897	2.29028	1.87847	2.41304	3.22643	2.6257	1.96949	2.20697	3.83693	3.20079	1.61859	2.09477	2.11645	2.59652	1.91407	2.40498	2.19947	1.55486	2.31741	0.762894	2.027	2.80184	1.61651	1.70833	2.06235	1.74826	2.49985	2.20305	2.79846	2.76983	2.62973	2.47099	3.04322	1.55553	1.43289	2.80684	1.83624	1.93419	3.169	2.86717
MMP13	0	0	0.01612	0.0163758	0.0738047	0.0135962	0	0.0376528	0	0.0505525	0.014936	0	0	0.0408057	0	0	0.0601614	0.594841	0.0162258	0.0154263	0.0197077	0	0	0.0160388	0	0.0184892	0.0796293	0	0.0175558	0.0161005	0.0138726	0	0	0	0	0	0	0	0.0197352	0.0633818	0.0440298	0.287898	0	0.0243433	0	0	0	0	0
FAS	2.36413	3.1607	3.30142	2.89165	3.13231	2.91897	3.57936	2.10156	2.66464	3.69567	2.94661	2.9451	3.68718	2.79975	2.47512	3.12943	3.05638	2.84064	2.9564	2.97084	2.93906	3.17974	2.79127	3.56367	3.79838	2.01536	3.28243	2.7967	3.78902	3.96747	3.61628	3.18885	3.33161	3.37169	2.80063	2.81148	2.81836	3.45258	1.64983	3.6077	3.7661	3.46857	3.79511	1.77912	3.54995	3.26382	2.80871	2.55582	3.49736
MTA1	4.4286	4.24098	4.1791	4.2962	4.68838	4.83332	4.5435	4.44839	3.66826	3.83591	4.6405	4.64525	3.80111	4.02793	3.47164	3.65233	4.60121	4.28505	4.7078	5.00233	4.36937	4.6488	4.3442	4.59883	3.81654	4.55658	3.6694	4.53325	4.49775	4.3495	4.14906	4.23342	4.51481	4.66725	4.5462	4.59907	4.01624	3.4375	4.99765	3.52263	3.99686	4.28779	3.52693	4.74202	4.84	4.59377	4.80371	4.63507	4.54094
MYO5A	3.57128	3.4064	3.77508	3.11593	3.55626	3.29756	3.54717	2.47685	3.61704	1.15669	2.99561	2.7713	3.85423	3.78575	4.14115	3.67118	4.05073	3.16957	3.64563	3.57946	2.97189	4.11348	3.86013	3.51144	3.67412	3.91649	3.39736	3.64939	2.69462	2.93007	3.07871	3.79836	3.29865	1.93937	3.14506	3.27578	3.13822	4.28525	3.49741	4.09706	2.15189	2.59073	4.05617	2.55373	2.93476	3.63294	3.30415	3.42055	3.41516
EDA2R	1.99668	0.14014	0.146352	1.38349	4.04028	2.80698	0.570914	0.684558	1.81202	3.52532	2.12229	1.33604	2.26289	1.09479	1.00006	0.389757	2.36384	0.337461	2.82763	3.79927	2.77119	1.52515	0.74594	0.772459	3.10575	0.268155	0.147752	1.68446	2.11601	2.1003	2.23359	1.80825	0.382002	0.32733	2.28894	0.493537	2.51549	1.89619	0.232049	2.39471	0.855816	1.65185	0.968413	0.389471	0.144683	2.61447	3.91085	1.29879	0.359985
CCN6	0.235454	0.254548	0.0836139	0.510301	0.152501	0.138246	0.27149	0.113584	0.535615	0.463367	0.372661	0.26361	0.301085	0.296921	0.333786	0.230629	0.121599	0.383362	0.163661	0.340742	0.356128	0.0590468	0.218631	0.0832023	0.151137	0.126083	0.276132	0.168928	0.20377	0.237306	0.309697	0.204398	0.164805	0.179955	0.11164	0.26239	0.301486	0.0880802	0.257068	0.503227	0.497148	0.217724	0.203499	0.144603	0.224583	0.15616	0.227893	0.230714	0.241705
ABL1	4.15672	3.52502	3.95098	4.90693	4.96767	4.34466	4.01183	4.75872	3.62391	4.52305	4.34505	4.66675	4.19178	3.89851	4.24734	3.94893	4.47225	4.5682	3.91416	4.69259	4.23315	4.42765	3.5454	4.51752	3.89353	4.47593	3.69445	4.41776	5.00763	4.28668	3.78991	4.30227	4.23692	3.864	4.40969	4.27403	4.22154	3.86973	4.43373	4.14577	4.13951	3.97518	4.1962	4.43456	4.65977	4.49548	4.49799	4.20153	4.20134
MMP9	0.259077	1.38461	0.21857	0.0198429	1.94591	0.0805712	0.147506	0.111297	1.22506	2.2033	2.41766	1.27216	1.80835	0.0970822	0	2.78258	0.756002	1.00676	0.833602	0.0186937	0.0704699	0.410638	0.520609	1.39369	0.203375	1.33219	4.12887	0.365308	0.751244	0.251701	0.0661068	2.18483	2.8421	2.05231	1.68769	0.0186619	0.136018	1.54242	0.679468	1.26486	1.59343	0.510198	1.41867	3.87446	3.14003	0.0445191	1.16339	0.547377	0.144392
MAPK11	3.00886	4.29108	1.31081	1.53685	1.87909	2.5925	1.35892	1.52698	2.25149	2.43604	2.45903	2.96683	0.555777	1.60484	1.07908	1.5087	3.34888	1.44945	2.26064	3.31196	0.749793	1.36044	1.63578	1.98062	1.49006	2.32528	0.676526	1.77591	3.28756	1.21735	1.04937	1.27291	3.14438	3.41017	3.36792	2.0942	1.67615	1.04432	3.3959	0.713034	2.38261	2.58651	1.44341	2.42696	2.46326	1.80968	1.37942	1.59319	1.74165
PTHLH	0	0.0119485	0.0269544	0.0542508	0	0.0780954	0.0290066	0.0626487	0	0.0564491	0.0125448	0	0	0.0343217	0	0.0147448	0.0170836	0.0133691	0.0537605	0.0257986	0.032926	0	0	0.0134719	0	0	0.0136758	0.0386907	1.16557	0.0401968	0	0.0883305	0.0960542	0.0510098	0	0.0384617	0.155729	0	0.0329718	0.0793418	0.0247988	0.022113	0.0121385	0.0406272	0.373471	0	0.158204	0.0138871	0.0642067
GLI2	0.0209101	0.037797	0.00618983	0.0125494	1.91063	1.70369	1.0949	0.00728059	0.0271013	0.0388472	0.0114447	0.956392	0.0048171	0.0313327	0	0	0.061365	0.725738	0.3625	0.00592257	0.738484	0.0065	0.0501502	0.0122909	0.00572944	0.0141715	0	0	3.46159	0.0245719	0.0420541	0.0467051	0.509746	0.0059068	0.136698	0	0.0149193	0.0323579	0.0813072	0.0367204	0.130758	0.0886658	0.0275272	0.0186673	1.36347	3.05485	0.0450349	0.0314686	0.649474
CXCR4	7.58807	6.84144	6.24135	4.9661	7.37765	6.38485	5.91512	4.68645	6.24588	6.10085	8.525	5.95126	7.03767	7.31054	6.01896	6.14224	6.9775	7.72339	6.3195	5.92456	5.39153	8.06171	9.55645	6.8048	8.10824	9.19047	7.50327	5.14038	3.59417	6.49449	5.22145	6.95759	6.47608	6.74978	6.08752	4.18938	4.96863	8.53623	6.47291	7.83293	7.19196	7.89692	6.34952	6.11938	7.03527	5.43846	5.56594	5.01335	6.62759
RIPK1	3.80548	3.76186	4.0222	4.11604	3.6992	4.15952	3.89804	3.08008	3.9052	3.90436	3.56889	3.8477	3.78389	3.80234	4.3323	3.68346	4.04664	3.92177	4.01294	3.82768	3.79965	3.83263	3.75648	4.12527	3.82136	3.38087	3.97289	3.85308	4.136	4.01184	4.00715	3.71646	4.19089	3.89824	4.03451	4.08572	3.94132	4.00071	4.01663	3.88612	4.0677	3.63123	4.0041	3.57385	4.42398	3.93962	4.094	4.34506	3.9235
HMGA1	6.75932	6.62602	6.38588	6.46266	6.26475	6.77345	7.07541	8.37408	6.21465	5.96006	6.3166	5.27054	6.29349	5.27226	6.00997	7.38834	7.09049	6.9163	7.61253	7.42482	6.97664	5.63115	6.96941	7.63398	6.72207	6.92779	6.35336	7.26282	6.98845	7.29414	6.91017	7.54442	5.23461	6.54465	5.8063	6.95602	7.10122	5.99494	7.61534	7.02605	5.65654	5.56884	6.91908	6.48569	6.44276	7.33184	6.1274	7.25318	5.9511
TNFSF10	2.67664	2.69839	4.84983	0.997632	2.39905	2.33813	4.06912	0.72012	4.62208	2.49483	3.70033	2.53977	4.6606	5.01027	2.54657	3.9638	1.69911	3.53047	2.77446	1.21152	2.15238	4.78085	3.10743	4.13624	2.87051	2.14082	4.88564	1.72605	2.34939	2.29043	2.35046	3.88714	4.30253	4.17683	3.04223	2.09302	1.61075	4.29368	2.05597	2.34142	3.62299	3.05295	4.59799	2.69398	3.17578	2.32339	2.56948	3.40888	4.89934
SIK2	2.94893	3.24757	2.8908	3.337	3.06275	3.1124	2.57795	2.98258	3.03696	3.38215	2.59666	2.97652	3.08009	2.74097	2.63702	2.89632	3.19655	3.07494	3.18614	3.28517	2.97013	3.00404	2.64884	3.18715	3.10421	2.98176	3.10671	3.07991	3.37363	2.67864	2.91955	3.1913	2.80748	2.26291	2.44975	2.95238	2.87361	3.07647	3.68195	2.64593	2.28216	2.45365	3.02022	2.60768	3.5369	3.11377	3.02639	3.01057	2.84929
ETV4	0.182553	0.293722	0.426856	0.461216	0.318971	0.209429	0.164045	0.402748	0.944637	1.2914	0.74025	0.31064	0.159294	0.467991	0.16651	0.846607	0.379744	0.253089	0.521491	0.16124	0.571717	0.343552	0.521824	0.434391	0.306774	0.290364	0.66769	0.226081	1.10078	0.34862	0.194387	0.139256	0.280783	0.182412	0.113201	0.193255	0.15553	0.235081	0.41735	0.190487	0.26652	0.265977	0.387925	0.21467	1.28862	0.278712	1.13328	0.61756	0.227041
S100A4	6.73415	5.62768	8.24524	5.01108	5.90148	7.78903	7.64044	7.9523	6.48509	4.034	4.74466	4.95995	7.97275	7.53309	5.87738	8.17418	6.23215	5.33679	5.8644	7.13553	5.8562	8.57565	7.38673	7.10939	8.62533	6.0274	8.01647	6.08397	7.27411	5.23796	6.98762	7.36952	7.80519	8.56112	4.38979	4.51526	5.20266	7.95997	6.00998	5.908	5.38195	5.52946	8.19139	6.10626	7.05323	7.51559	5.70505	6.41803	7.83578
NTF3	0	0	0	0.0159015	0	0	0	0.0184009	0	0.187124	0	0.015777	0	0	0	0	0.0197458	0	0	0	0	0	0	0	0.0144924	0	0	0	0	0	0.0134705	0	0	0	0	0	0.0126277	0.0328336	0.0191643	0.0311159	0	0	0	0	0	0	0	0	0
NA	NA	NA	NA	NA	NA	NA	NA	NA	NA	NA	NA	NA	NA	NA	NA	NA	NA	NA	NA	NA	NA	NA	NA	NA	NA	NA	NA	NA	NA	NA	NA	NA	NA	NA	NA	NA	NA	NA	NA	NA	NA	NA	NA	NA	NA	NA	NA	NA	NA
MIR124-1HG	0.00939798	0	0	0.0334628	0	0.00932998	0	0.0130109	0.0242878	0.947512	0.0405734	0.0111526	0.0341525	0.135254	0.0170022	0	0	0	0	0	0	0.0116184	0.0226657	0	0.0102432	0.0126944	0	0	0	0	0	0	0.0134532	0	0	0.0105698	0.0353675	0.0686546	0	0.0110569	0	0	0.0295536	0	0.0733554	0.0253129	0.0135878	0.0226088	0
LATS1	3.48726	3.93215	3.50592	3.98698	3.5718	3.58647	3.38007	3.42508	5.19398	4.65162	3.08227	3.3195	3.50299	3.51144	4.04128	3.79077	3.75202	4.04499	4.29514	3.65459	3.8743	3.23093	3.20205	3.57708	3.3422	3.17427	3.82817	3.566	4.15254	3.55489	3.90233	3.62044	3.57003	2.07008	3.01837	3.83024	3.79461	3.4954	4.42621	3.88884	3.47737	3.51302	3.76565	2.33333	4.21873	3.66983	3.64982	3.91251	3.36106
HTRA1	0.106351	0.650436	0.0841758	0.166177	0.275602	0	0	0.0501159	0	0.232412	0.0395917	0	1.1775	0.229681	0.0967799	0.113458	0.31808	2.15554	0.430554	0.0205848	0.0774603	0.0667086	0.608976	0.123887	0.970246	0.331858	0.600114	0.0410538	0.0464672	0.124346	0.0185149	0.331847	0.101799	0.0407726	0.252122	0.040811	0.0345103	0.964106	0.0263216	0.182802	0.442578	1.24963	0.0571066	0	0.0716001	0.0489789	0.266729	0.0651887	0.822473
CEACAM3	0.542368	0.704137	1.05327	0.0150746	0.491278	0.0249223	0.227395	0.0851885	0.742052	0.829102	0.427301	0.129335	2.35091	0.367779	0.0890602	0.168509	3.72657	2.38569	0.115374	0.123035	0	0.815626	0.103563	0.54882	0.0674203	0.177023	1.76188	0.0699365	0.370606	0.141775	0.0504134	0.363788	0.121766	0.732017	0.0837167	0.10969	0.0472966	1.07157	0.220024	0.550809	0.0669834	0.0714951	0.245229	1.24013	1.26357	0.0170447	0	0.809789	0.730017
EIF2AK3	3.02911	2.83592	2.37897	2.92307	3.01125	2.56643	2.2791	1.60127	3.22262	3.47236	2.72979	3.31706	2.60682	2.92422	2.71727	2.70959	2.64351	3.3055	3.07997	2.74817	2.5745	2.2266	2.93259	2.64458	2.4498	2.87115	3.09737	2.74741	2.7664	2.74053	2.81183	2.87243	3.0584	1.72653	3.4248	2.78407	2.91828	2.89457	3.16335	2.8078	3.13323	3.37946	2.74469	2.20817	2.88982	2.45051	2.94589	2.97314	2.26847
LAMB3	0.0887183	0.302921	0.493189	0	0.156047	0.20733	0.108392	0.183802	0.0634138	0.0708047	0.187011	0.048561	0.158647	0.44805	0.0298667	0.761791	0.0486863	1.04236	0.140858	0.0186303	0.169565	0.0994121	0.116127	1.2001	1.19848	0.391647	0.0676749	0.0823483	0.0626844	0.0855042	0.0578132	0.572706	0.658635	0.271906	0.0224755	0.0729977	0.0312478	0.647231	0.0355943	0.0481497	0.145558	0.1522	1.35509	0.269917	1.13142	0.0660528	0.104521	0.0494039	0.109266
LAMC2	0.0118712	0.00617927	0.00700427	0.00711574	0	0.00590473	0.00503206	0	0	0.0510814	0	0	0	0	0	0.0152178	0.0263665	0.0410048	0.0140665	0.00670192	0	0	0.00720236	0.00696888	0.00648344	0.0318845	0.0141147	0	0.00763026	0	0.0120251	0.0133704	0	0.00668408	0.016139	0	0.00564718	0.0365721	0.00858117	0.0069992	0	0	0	0	0.0059339	0.0160525	0	0.0143328	0.00676155
LAMA3	0.887197	0.0587172	0.154501	0.013741	0.00317067	0.340189	1.25686	0.0815991	0.0694727	0.127211	0.0555554	0	0.0646002	0.0385157	0.0104248	0.0473314	0.0752556	0.0751575	0.671401	0.337547	0.0926142	0.177701	2.11995	0.156794	0.541516	0.186331	0.0271952	0.142854	0.19046	0.807611	0.141795	0.0542161	0.0041283	0.00969272	0.0272275	0.165373	0.262151	0.024876	0.108278	0.0135164	0.00933991	0.0220903	0.0799393	0.0800609	1.90772	0.0649096	0.269637	0.621687	0.201668
CDH2	0.00785673	3.12088	0.0275774	0.0187357	0.00864496	1.23257	0.331861	0	0.0502777	0.00978529	1.46965	0.0818272	0.214283	2.83815	0	0.0200812	0.0461502	0.172523	2.57849	0.680917	3.53692	0	0.0376797	0.045446	0	1.66832	0	0.00889016	0.030023	0	0	0.0176471	0.022412	2.07393	2.84516	0	0.0514267	0	0.446509	0.00924446	0.0503062	0.985481	0.00829223	3.05937	0.0233885	0.0316556	1.60029	0.0651458	0.691309
CSNK2A1	4.6262	4.30204	3.99693	5.09759	4.87206	4.69238	4.4388	4.72544	4.77551	4.82802	4.26096	4.45825	4.06254	4.13678	4.83307	4.61326	4.34847	5.00479	4.58496	4.56816	4.56227	4.19502	4.30362	4.50636	4.0779	4.52226	4.66726	4.74227	4.79352	4.72353	4.87068	4.43244	3.9656	4.11522	4.27695	4.60239	4.99714	3.87948	4.68824	4.80872	4.02364	4.18926	4.54313	3.94737	4.51622	4.53627	4.63596	4.36285	4.00915
EDIL3	0.0067803	0.0417575	0	0.0401076	0.725339	0.00673119	0.0114505	0.0371993	3.8523	0.0742857	0.0073962	0.0476253	0.29216	0.0403147	0.0122755	0.0928894	0.116532	1.54212	0.0553392	0.39315	0.0194689	0	0.0800697	0.107421	0	0.0182651	0.00806433	0.0153044	2.34529	0.137203	0.00686835	0.351675	0.0573022	0	0.0544778	0.0672302	0.275239	0.0579508	0.0291462	0.0316523	0.0146464	0.172825	0.478031	0.0120745	0.0466982	0.00917414	4.44199	0.00818921	0.146833
EZH2	3.99277	4.07305	2.76756	3.96364	3.32858	3.81729	3.72017	3.56737	4.24477	2.79442	4.75923	3.49086	4.24621	3.59505	4.32012	3.87789	4.13745	3.74974	4.1652	3.67924	4.23992	3.59261	4.1892	4.50362	3.83874	4.19239	4.55575	4.30866	4.65405	4.03589	4.12486	4.12454	4.20594	2.64333	4.11148	4.56676	4.38162	3.54644	3.1785	4.34404	3.88775	4.13359	4.47829	3.54142	3.9595	4.07255	4.33854	3.41477	3.5575
ZEB2	4.02662	3.28507	4.6969	3.80393	4.62325	3.33331	3.70248	3.67408	4.51741	2.93822	3.96662	4.12644	4.73046	5.4679	5.37539	5.39718	3.81191	3.99615	3.79185	3.69783	4.44732	4.90474	4.21139	4.35958	5.13625	3.82898	4.32793	4.50899	4.4848	4.41676	3.81286	4.74469	4.62703	3.38547	3.57373	4.64772	4.64069	4.92996	3.29423	4.287	4.06216	4.19947	4.79168	2.92232	4.98299	3.53955	4.70142	3.65809	4.02514
TLN1	5.89185	6.30117	7.8122	6.55334	6.34496	6.49975	6.17978	5.60284	5.69148	5.54879	5.12311	5.90324	6.77645	6.16422	5.9856	6.31036	6.5737	6.99851	7.11189	5.99589	5.56111	7.09174	5.86428	6.99303	6.763	6.53973	6.19596	6.54467	7.04821	6.07562	6.0561	6.48117	6.54356	6.13588	6.20537	6.21633	5.76402	7.46254	7.15834	5.54632	5.12276	5.52893	6.61355	5.87651	6.29693	6.37952	6.16614	7.65012	6.48174
EPHA2	0.39886	0.0666324	0.0219246	0.0111788	0.507967	0.0637305	0.0696637	0.112476	0.0596448	0.101517	0.0502662	0.734393	0.0589256	0	0.0169088	0.023869	0.312435	0.812238	0.0758054	0.378883	0.0530958	0.0115544	1.44172	0.572923	0.182225	0.903125	0.0760596	0.0105748	0.159366	0.0856661	0.00946744	0.178658	0.16494	0	0.528518	0.0313078	0.0524449	0.489446	1.1808	0.0434898	0.0981354	0.525017	0.123253	0.0166323	0.0729599	0.0499165	0.154358	0.0555682	1.47567
SOD2P1	0	0	0	0	0	0	0	0	0	0	0	0	0	0	0	0	0	0	0	0	0.0967444	0	0	0	0.274712	0	0	0	0	0	0	0	0	0	0	0	0	0	0	0	0	0	0	0	0.132207	0	0	0	0
SIRT3	2.20844	2.98278	2.073	2.50822	2.4155	2.64773	2.82781	2.42935	1.94418	2.55812	2.39288	2.79274	2.00507	2.28107	2.30722	1.80493	2.76052	2.26529	2.40457	2.56832	2.53121	2.14409	2.71612	2.36218	2.10147	2.90279	1.86889	2.26115	2.34539	2.33555	2.05964	2.22204	2.70478	2.80224	2.49957	2.28057	2.1612	2.00811	2.40792	1.90083	3.1649	3.01775	1.9842	2.23801	2.33295	2.66945	2.0461	2.55706	2.75851
OLFM3	0	0.0268625	0	0	0.00954254	0	0	0	0	0.0842239	0.00945997	0.0102924	0.0775881	0.0130232	0	0	0.0128876	0	1.33102	0	0.187917	0	0	0	0	0.0233371	0	0	0	0	0.00878528	0	0	0	0	0.0290677	0	0.0426123	0	0.0102041	0	0	0.0091533	0	0.0172533	0	0.0249732	0.783515	0
CEMIP	1.48453	1.39847	0.863116	1.50708	1.03295	1.02518	0.600239	0.998599	1.66023	1.23429	0.698707	1.4627	0.810684	1.74746	2.02235	0.826878	1.77293	1.21163	1.82733	1.58246	1.20749	0.706557	1.1866	1.03687	0.430851	1.94451	0.829086	1.04258	1.42222	1.22628	0.598178	1.05044	1.62985	0.286031	1.06112	1.32683	1.23075	1.0226	1.46031	1.26228	1.0615	1.19328	0.759279	0.50992	0.637426	1.16607	1.30979	1.40371	1.03751
FBXW7-AS1	0.72593	1.04051	1.19157	0.685953	0.782217	1.28848	0.452843	1.07584	1.52988	1.9627	0.964483	1.198	0.792802	2.30275	3.06713	2.15395	1.13059	1.18124	1.08417	1.48632	1.24011	0.622367	1.04007	0.820896	0.963958	1.30681	1.19971	1.21164	1.56496	0.823316	1.02185	0.863004	1.62446	0	1.0623	0.862008	1.16459	1.44147	1.72616	1.48352	0.837506	1.17756	0.546179	0.332593	1.01071	1.18852	1.98035	0.975156	0.868903
CLU	1.15954	2.40488	3.73881	0.555255	1.44242	5.68993	5.9192	2.23384	0.166144	1.70523	4.26243	6.01176	3.31711	3.41399	0.0421457	1.24081	3.49511	3.35518	5.12012	1.95189	4.21801	3.40105	3.36599	1.11984	0.415845	2.54458	1.6548	1.48014	4.88716	2.07753	4.17309	2.15925	6.3204	2.76562	6.07066	0.271262	0.112971	4.06542	1.54763	0.76332	5.07353	6.58746	1.33233	3.64496	2.51912	4.40975	2.15727	5.90825	3.35428
SPINK1	0.0261115	0	0	0.0311963	0	0.0259237	0.043896	0.0712599	0	0	0	0	0	0	0	0	0	0	0.256915	0	0	0	0.0315728	0	0	0.199361	0	0	0.033432	0	0	0	0	0	0	0	0	0	0	0.0306895	0	0	0	0	0.0260509	0	0.0376561	0	0
CPEB2	1.66933	1.93114	2.46729	2.27651	1.97174	2.35939	3.29671	0.800198	2.85934	1.94456	2.65933	1.80733	2.95881	2.53401	2.35409	1.03825	2.79983	2.58243	2.00367	2.06331	2.30062	2.90336	2.48404	0.850736	3.00758	2.31402	2.53932	1.2824	2.49226	1.06971	2.27674	1.84866	3.11727	2.33551	2.31592	0.43027	0.926786	3.37133	2.06782	2.05853	1.98747	2.18248	2.26325	1.91137	2.42893	1.74028	1.70384	2.12842	2.26653
TSG101	3.77335	4.15531	3.67845	3.82663	3.49913	3.96818	3.82625	2.91255	3.78315	3.71836	3.70211	3.44724	3.55924	3.4686	3.50564	3.69345	3.60896	3.99584	3.53237	3.54224	3.39002	3.72201	3.49551	3.67916	3.83752	3.43011	3.82141	3.74001	3.80421	3.79262	3.8468	3.65899	3.81673	3.74185	3.47428	3.71207	3.83815	3.7205	3.50987	3.77941	3.58083	3.59537	3.59121	3.48222	3.43941	3.73025	3.70151	3.73921	3.56278
MIR200A	0	0	0	0	0	0.569007	0.497658	0.744262	0	0	0	1.59651	0	0	0	0	0.786426	0.359787	0	0	0.767506	0.379938	0	0	0.339705	0	0	0.351231	0	0	0	0	1.62972	0	1.21799	0	0	0	1.03912	0	0	0.555727	0	0	0	0	0	0	0.352661
SERPINA1	3.72519	2.72566	7.55848	0.52163	3.34458	2.05799	5.99183	3.5123	4.42856	1.17042	3.0038	5.13368	6.65464	5.40703	1.55604	5.64713	1.94392	3.54024	0.917842	0.0954038	1.30976	6.06943	3.90384	5.46342	1.1625	2.60539	5.51607	3.99821	4.82166	3.59009	3.90136	4.75548	5.91581	5.92177	4.85966	3.96048	3.89915	7.20783	0.85775	2.58611	3.64203	4.59925	5.26537	3.39278	3.99918	4.36833	0.580163	4.56976	7.02314
AKT3	2.76064	2.9535	1.87385	3.61114	0.605232	0.490564	1.8201	0.590892	3.90004	0.707415	0.830386	1.61335	3.19312	1.85313	1.28911	1.03618	3.22445	2.21515	3.0467	4.20252	1.33934	3.48002	3.08153	1.97789	2.26141	3.58853	1.26422	1.07562	4.06008	1.25072	0.902947	1.71621	1.84182	0.882359	1.61288	0.917724	1.27128	2.07226	1.07036	0.70905	1.77628	1.95573	2.02027	0.723763	0.736387	0.943598	3.43049	1.32963	1.13557
RELA	4.10861	4.67226	4.55073	4.17976	4.22337	4.51472	4.21416	4.55622	3.83545	3.66419	3.98433	3.76742	4.37229	4.42204	3.60124	3.97891	4.19209	4.35876	4.25532	4.46987	3.79011	4.55941	4.33984	4.25349	4.12874	4.6479	3.68958	4.11557	4.08225	3.90791	3.87343	4.30076	4.1755	4.83786	4.30094	3.8743	3.5552	4.25007	4.24268	4.02152	3.56414	3.84348	3.98274	5.16334	4.55068	4.15773	4.07849	4.31572	4.36095
PRKCA	2.10557	2.13578	2.45045	0.479779	2.28655	0.360574	0.602789	0.406978	3.84095	3.845	0.901047	3.04439	2.64042	2.20551	0.276245	1.95046	1.13826	1.48907	2.62948	1.45284	0.406055	3.03881	3.14597	3.11091	2.55344	1.66144	2.98375	2.4295	3.91293	1.58321	1.29056	2.72708	4.12707	1.23685	2.99096	1.3219	2.3144	3.10902	2.48703	0.452152	2.20378	3.00284	3.71003	1.10452	1.40291	1.71999	3.70384	2.47745	2.09758
TNFRSF1A	5.21969	5.27969	5.86548	5.62956	6.15075	5.47022	5.5044	6.47206	4.38663	4.8225	4.96854	5.35863	5.02121	4.85566	4.81464	5.44106	5.67779	5.19438	5.09382	5.49764	4.94855	5.45187	4.98651	5.79843	4.87284	5.48014	5.18684	5.71044	5.4254	5.67035	5.36894	5.49593	5.53441	5.61115	4.97428	5.92008	6.0467	5.26513	5.84816	5.13538	4.77891	5.25927	5.38474	4.58561	3.75242	5.2828	5.65422	5.21481	5.69891
FASLG	0.118894	1.58889	0.344669	0.249128	0.306106	0.0990469	0.210907	0.0834348	0.246057	0.584591	0.442844	0.658109	0.365837	0.494768	0.142583	0.19786	0.490384	1.34973	1.74841	0.0458245	0.141731	0.339935	0.554146	0.435518	0.189645	0.183362	0.308598	0.979925	0.174589	0.363313	0.195391	0.133302	0.537568	0.0457042	0.209071	0.38523	0.234741	0.192017	0.581296	0.203747	0.994484	0.780985	0.105094	0.106521	0.0801582	0.232036	0.271785	0.872179	0.370775
AFP	0	0	0	0.0142507	0	0	0	0	0	0	0.0129969	0	0	0	0.0427701	0	0.0176983	0	0.0141202	0	0	0	0	0	0.0129873	0	0	0	0	0	0	0.0134215	0	0	0.0162005	0	0	0	0.0171768	0	0	0	0	0	0.200309	0	0.0172226	0	0
CEBPB	3.63719	3.20141	6.25781	2.6911	4.34134	2.97444	4.49671	3.76399	2.76124	1.37948	4.28097	2.60571	4.89401	4.64768	1.57546	3.97132	4.49786	4.36185	2.61956	2.82579	2.23468	6.12975	3.9509	4.55647	4.63607	4.77051	4.37611	3.25412	4.21698	3.02182	2.79985	3.74371	3.74002	6.15596	2.51668	3.00226	2.67925	6.1271	3.66155	4.13429	3.32552	2.70487	4.18345	3.76278	3.32234	3.19818	2.76611	3.61532	6.01303
SATB1	4.75222	4.42996	4.0059	4.11972	5.10389	4.33054	4.58032	4.43387	4.50535	5.45155	4.70025	4.55535	4.32291	4.84404	5.44636	4.72447	4.11384	4.03166	3.94442	4.91714	5.15421	4.10717	5.25387	5.2163	5.60907	5.3133	4.45726	4.41365	4.01025	4.19363	4.42809	4.98811	4.131	3.58294	4.867	4.70644	4.90049	3.31322	3.77127	4.54165	5.03133	4.80273	4.5524	4.35983	2.08472	4.60769	5.59376	4.56966	4.35323
EEF1A1	10.5988	9.3446	9.36713	10.2498	9.82836	9.95531	10.3851	8.24093	9.57383	8.91831	10.0313	9.76919	9.69624	9.15031	9.36747	9.79679	9.54825	9.38852	10.1569	10.2945	9.67463	9.47569	9.97519	9.70204	9.79768	9.84503	9.40752	10.1466	9.75255	10.6152	10.3301	10.1326	8.36698	9.68323	9.92238	10.1602	10.4267	9.1507	9.96915	10.383	10.0413	9.64883	9.47992	10.7733	10.5435	9.97746	9.77092	10.6601	9.22539
ITGA8	0.0508941	0.334739	0.0301948	0.0725446	0.176853	0.0051335	0.0130843	0.0213829	0.128659	0.38328	0.175408	0.0543245	0.203333	0.182692	0.00936608	0.22144	0.266702	0.243374	0.985005	0.00582678	0.0148633	0.0127616	0.503444	0.0710801	0	0.29085	0.289449	0.0798416	0.221476	0.111395	0.0208395	0.30414	0.00740694	0	0.128144	0.0173806	0.188732	0.247858	0.101102	0.0944129	0.0764813	0.610311	0.203654	0.0274631	0.123741	0	0.241189	0.313803	0.00587864
PBK	1.72128	1.58386	0.420391	0.767501	1.17902	0.580903	0.43132	0.48342	2.16041	2.14512	2.88269	1.71505	1.79545	1.2903	0.320912	1.66866	1.96978	3.17015	2.25113	0.707733	1.70067	1.00292	1.17338	1.14705	2.44657	0.801481	1.76838	0.326982	1.61701	0.387912	0.740136	1.2244	0.866554	0.0399367	1.05028	0.463926	0.784948	1.51712	0.385708	0.854688	1.0578	1.59634	1.64849	1.29153	2.88799	0.383311	0.537986	1.31824	0.423027
LTB4R2	1.91038	2.6371	3.36842	2.68787	3.0414	2.97835	2.98215	1.55927	2.67256	2.20005	3.10873	1.75817	3.80831	3.42386	2.7414	1.88071	3.59825	1.85822	2.79468	2.69277	2.73695	4.44091	2.7749	3.18188	3.12747	3.28891	3.26387	2.70432	3.38018	2.41107	2.47202	2.52082	2.94932	1.82274	1.7469	2.81738	1.80747	3.12108	2.93138	2.3847	1.6284	1.60832	2.74255	2.11316	2.36801	3.2773	3.08019	3.07308	3.12275
CD63	5.25605	4.32631	6.14161	5.28916	5.46069	5.7234	5.69374	5.87576	4.43574	4.15996	5.24398	5.85102	5.54538	5.88577	4.98336	5.62394	5.92991	6.0382	4.99975	5.4271	4.61348	5.96784	5.31886	5.68856	6.17832	5.55013	5.63848	5.40653	5.78487	5.35267	5.4472	5.70477	7.33709	6.93273	6.48952	4.99751	4.37948	6.64943	4.79179	5.89902	6.48045	6.43298	5.41066	6.83368	4.63181	5.69793	5.213	5.80526	5.87281
NOX4	0	0.00663133	0.00751653	0.030305	0	0	0	0.00884037	0.0165233	0.0470605	0.0138923	0.00757616	0	0	0.0230231	0.00818677	0	0.0367309	0	0	0	0	0.00772907	0	0	0	0.0151442	0	0	0	0.00646589	0.00719083	0	0	0.00868364	0	0	0	0	0	0	0	0.0134427	0	0	0	0	0.00770957	0
MAVS	4.8311	4.57938	5.14457	5.27231	5.26042	5.22909	5.07054	5.84959	4.77752	4.74697	4.5132	5.64605	4.81612	4.71814	4.85902	4.95154	5.39191	4.72059	4.81461	5.32086	5.03109	4.8304	4.66773	5.38528	4.72748	4.53415	5.0892	5.36899	5.50183	5.12912	4.9385	5.24564	5.29783	4.62818	5.08471	5.21326	5.02391	4.69425	5.26025	4.82908	4.83347	4.91147	5.14189	4.40808	5.31578	5.2022	4.60613	5.12657	5.0793
RHOB	6.56834	3.4047	6.56536	4.46949	4.27983	5.34204	4.44044	4.37253	6.39905	4.7612	5.93289	4.5092	6.02404	4.5271	2.3717	5.04822	5.57964	4.46863	3.86601	6.97518	1.80645	6.48266	6.72043	5.49518	6.31101	3.68895	1.40094	3.94806	3.84055	4.96946	5.57054	5.76949	6.54806	7.9168	5.44849	3.92175	5.94752	6.50101	5.77337	5.83613	5.59966	5.94547	5.99911	6.38235	6.84787	4.26491	0.992776	5.0457	5.05993
CCN2	0.789152	1.69837	0.095007	0.486569	1.04853	0	0.0954769	0.469325	3.03122	0.561002	0.53995	0.0390609	0.498765	0.165633	0.722324	0.103206	0.710461	1.78506	0.90847	1.66091	0.432918	0.137615	1.41468	0.298972	5.96137	1.07695	0.71923	1.96979	2.28881	0.771525	0.0333896	0.502562	0	0	0.510788	0.810781	0.908964	1.16046	0.115621	1.41127	0.232935	1.80637	0.488066	0	4.79971	0	0.554366	1.86367	2.54172
PPP1R13B	0.387681	1.35678	0.551328	0.237703	0.215889	0.199837	0.235362	0.190379	1.33124	1.08598	0.562463	2.14951	0.554842	0.639842	0.302707	0.645862	0.557924	1.75604	1.06325	0.199665	0.307297	0.647613	1.07197	0.639507	0.581121	0.590669	0.377586	0.488691	0.290229	0.515662	0.196026	0.524535	1.51926	0.429256	2.01292	0.39308	0.180849	0.90344	1.86085	0.190221	1.11352	1.21576	0.403013	0.45255	3.60607	0.1965	0.570836	0.9617	0.451628
PLG	0	0.00633679	0	0.0145574	0.00671179	0	0.00516039	0.008448	0.00791748	0.052363	0	0	0	0.00916317	0.0543981	0	0	0	0.00723006	0.00687274	0.034833	0	0	0.00714648	0.0066487	0	0	0.00690229	0	0.00717406	0	0.0137104	0	0	0	0.00686099	0.0173042	0	0	0.0143196	0.0131793	0.0117468	0.0128469	0	0.0301725	0.0164603	0	0.00736726	0.00693389
RAF1	4.68361	4.46423	4.52195	4.65303	4.73925	4.52349	4.20611	3.79125	4.83509	4.94278	4.79298	4.6943	4.89986	4.91361	4.38292	4.48211	5.22899	4.90029	4.62812	4.61634	4.36466	4.58067	4.631	4.82938	4.52852	4.72535	5.11827	4.4669	4.7699	4.40714	4.54128	4.7524	5.17095	4.08018	4.75221	4.45861	4.43422	4.72164	4.02337	4.44213	4.72585	4.75188	4.80109	4.76874	4.26384	4.58816	4.67859	4.51117	4.70298
PRKCQ	3.972	4.27051	2.79365	3.75999	2.55031	3.79786	3.3902	2.90775	4.23388	4.40548	2.88747	3.66885	2.07379	2.83173	4.31673	3.2183	4.04479	4.42722	4.67763	4.13191	3.80988	2.64089	3.25352	3.78134	1.6037	3.86688	2.43099	3.6731	4.92351	3.40129	3.59724	3.11034	2.7271	2.7597	3.11286	3.39456	3.1734	2.28528	4.52941	3.55439	3.15067	3.49083	2.69633	2.91219	3.93835	3.86215	3.72623	4.45655	3.2147
BRCA2	1.98874	2.66834	1.86753	2.25542	2.27853	1.66102	1.8042	1.63956	3.27662	3.04906	2.53337	2.02234	2.39076	2.70594	3.2746	3.18603	2.40962	2.93644	2.49462	2.5571	2.68717	2.12426	2.10719	2.98283	3.17353	2.5304	3.75048	2.57498	2.77595	2.19087	2.5655	2.78959	2.25963	0.706028	2.34005	2.4986	2.67306	2.77782	2.97399	2.68113	1.44097	1.75702	3.30262	1.77254	1.64172	2.09384	2.50544	2.11948	1.38978
PARP1	5.02732	5.56571	4.64663	5.03804	5.24637	5.62464	5.20085	4.10715	5.14186	4.81515	4.83066	4.79888	4.32812	4.306	4.70714	4.63975	4.81115	5.44292	5.53661	5.20725	4.97664	4.5482	4.58296	5.26572	4.72272	4.68791	4.64402	5.60745	5.11303	5.28844	5.52255	4.76658	4.28871	3.44466	4.37568	5.46888	5.3184	4.11343	5.8549	4.88612	4.04734	4.37883	4.65574	4.38901	5.37536	5.65593	4.87263	5.34204	4.451
DOCK1	3.71051	3.06009	1.06701	0.0283811	1.86321	4.56248	3.0974	0.00662397	2.20048	0.189891	0.0613848	0.0169617	1.57995	2.46426	0.0172721	1.30448	0.180652	1.88567	3.76572	3.70292	4.75618	0.0176687	2.47007	2.16934	1.46041	2.81156	0.938463	0.0161736	0.0424066	0.027906	0.944751	3.03591	0.0272058	1.86034	0.130828	0.010738	0.00453988	0.375288	4.75096	0.0768523	0.119413	0.590814	1.61051	1.22929	2.98109	4.73913	3.15268	2.47021	2.34403
SP1	5.14395	5.01247	5.29922	4.97775	5.36907	5.1605	4.87006	4.9022	5.45964	5.10384	4.55221	4.43911	5.25847	5.18549	4.84162	5.00521	5.15472	5.06513	4.88344	5.35707	4.93566	4.99839	4.56627	5.36235	5.26742	4.77759	5.36352	5.19963	5.07802	4.98278	5.26137	5.02705	4.83859	4.49558	4.25023	5.1569	5.41328	5.02577	5.40155	5.29212	4.28701	4.36849	5.18121	4.11019	4.46284	5.10331	5.54039	5.18775	4.92486
HAVCR2	1.13342	2.18156	4.12577	3.15117	2.85776	2.865	3.44045	4.10954	1.47577	1.22482	0.504529	0.646458	3.2623	2.59295	3.97332	3.83942	0.690044	2.28331	1.59967	2.28578	3.3851	3.52759	2.52186	4.00673	2.42059	2.5228	1.86317	3.85526	2.59333	3.96175	2.0887	3.73676	2.90472	3.24043	1.61842	3.78996	3.57878	4.21122	1.32086	3.69341	1.78867	1.42576	3.97422	0.529783	2.00719	3.12707	3.49022	3.40128	2.90778
VTN	0.439781	0.637327	1.44991	1.28666	0.587446	0.550288	0.840969	0.707502	2.09402	0.969205	1.33283	1.04123	1.13362	1.10817	0.788508	1.28059	1.53907	0.950607	0.809664	1.24383	1.2022	1.99145	1.07477	0.747439	0.695349	1.91505	1.02411	0.576928	1.04119	1.17507	0.514736	1.02977	1.19738	0.46004	0.838767	0.712901	0.833847	1.27848	1.42693	0.749981	0.765199	0.911616	1.01637	1.84122	0.668029	0.721182	1.5692	1.02594	0.627219
INHBB	0.0121203	0.0859121	0.0142677	0.0430528	0.0396386	0.0239658	0.0204427	0.0167736	0.0312767	0.0448043	0.0649162	0.0286192	0.0760336	0	0.0219106	0.0309078	0.186634	0.497868	0.176393	0.0136533	0	0.0149805	0.25603	0	0.0262986	0.110846	0.239638	0	0.030913	0.0561759	0.0244511	0.080032	0.0344803	0.105499	0.12683	0	0.0566477	0.0737237	0.0686452	0.0423562	0.101779	0.910041	0.203381	0.183282	0.637383	0.0163888	0.212633	0.0434617	0.0274186
RANBP9	4.75817	4.7137	4.0575	5.14649	5.30302	4.88822	4.79963	4.56086	4.91816	5.35113	4.72219	4.8533	4.42723	4.67914	5.49019	4.67724	4.71562	5.124	4.56079	4.67314	4.78595	4.77128	4.65676	4.69672	4.67814	4.99186	5.00869	4.72621	4.89263	4.84773	4.78687	4.91145	4.85882	4.44191	5.30364	4.80626	5.4011	4.54376	4.8592	4.90582	4.78834	4.8387	4.97309	4.68348	5.25397	4.91493	4.60528	4.76102	4.41808
PDCD4	5.13457	4.8892	4.21171	5.2156	5.00795	5.11947	4.7214	4.24206	5.21026	4.91002	4.70927	4.88696	4.39291	5.08853	5.27379	4.99889	4.83491	5.63991	5.02659	4.8997	5.15096	4.63955	4.5286	4.88049	4.23446	4.80212	4.88332	5.107	5.28318	5.06958	5.19601	5.19529	4.57109	4.04465	5.05124	5.05773	5.37166	4.43788	5.04865	5.72628	5.38474	5.17264	5.40291	4.39469	6.05308	4.80862	5.00174	4.75627	4.32792
PRPF4B	5.00293	4.92378	4.73399	5.20232	4.96911	4.78493	4.66032	3.39389	5.36168	5.29742	4.78909	4.81678	4.61449	5.23567	5.48171	4.80493	4.77158	5.2567	5.11318	5.06345	5.06658	4.25792	4.60686	4.69271	4.93553	5.00356	4.99582	4.83731	4.85311	4.74411	5.16905	4.9451	4.991	3.98077	5.16879	5.11891	5.1515	4.67338	5.10794	5.06646	4.92872	4.85043	4.76604	4.4052	5.45036	5.01966	5.0274	4.70891	4.60093
SESN1	3.71476	3.44322	2.8945	3.42342	3.60959	3.4578	4.17564	2.04924	4.10037	2.71487	3.21168	2.27189	2.59917	2.83193	3.1552	2.81055	3.57229	3.138	3.91847	3.73818	2.67215	4.57672	3.65018	3.51173	3.79066	3.47344	2.89244	3.32509	3.15163	3.1325	3.73723	2.76161	2.5126	2.64545	2.1087	3.54942	3.61705	4.77748	3.86772	3.65901	2.46515	2.3257	3.13393	2.23583	3.90153	3.58073	3.7172	3.96052	3.44515
SESN3	4.18571	5.2198	3.60138	3.90532	4.80011	2.47757	2.05503	3.60639	4.88844	2.41	2.66607	3.09262	4.11491	4.53535	1.92919	3.68352	4.74685	4.58789	4.84844	4.22771	1.15535	3.65311	3.39601	3.0587	4.517	3.30962	2.20671	4.2112	3.85558	3.4722	0.919398	3.52363	2.78317	2.10589	3.80257	4.11278	3.33404	4.53059	4.83863	4.27671	3.98701	3.90844	4.14423	2.12844	4.36427	0.956412	4.12753	2.5972	2.77147
PHLDA2	0.864592	0.912452	1.53635	0.048063	0.0442576	0.224773	0.442633	0.210312	0.330384	1.2268	0.168036	0.138588	0.474101	0.820647	0.0722316	0.59317	0.171674	0.578997	0.0937331	0.433935	0.267929	2.22557	0.995947	0.301266	2.56232	0.851035	0.0477889	0.0454971	1.56653	0.137385	0.0804469	0.564067	3.77609	1.86423	0.760148	0	0.0755212	1.22456	0.268273	0	0.0435605	0.348333	0.563688	1.33052	0.722005	0.298629	0.219005	0.269291	0.50428
ZBTB7A	3.52127	3.82093	5.3938	3.9126	3.94776	3.96094	4.14404	5.37797	4.28693	3.7009	3.65843	3.82756	4.66981	4.7497	3.7369	4.83372	4.6248	4.3603	4.18274	3.79529	3.92819	5.27365	4.1872	4.59948	4.67665	4.38379	5.07578	4.51232	4.51364	4.46485	4.10112	4.59234	5.03344	4.61163	3.85347	4.57101	4.08612	4.96722	4.53435	4.25949	3.87162	3.6541	4.6466	4.80419	3.84102	3.75008	4.02558	4.38703	4.74087
CD24	2.929	1.28262	0.77354	0.503697	0.949951	4.29682	3.44906	1.5115	1.19684	2.85241	0.943897	0.919368	1.51779	0.275025	0.325743	0.210165	3.69918	3.65339	0.870258	0.235199	0.693066	0.16193	0.94103	0.304848	1.70276	0.462254	3.77954	3.85851	4.73698	1.93513	0.427416	0.437306	0.39264	0.517709	0.998702	1.33465	1.76678	0.713734	0.29498	1.10484	1.71701	1.78329	0.500387	3.51709	8.10438	0.615292	0.528384	1.07547	0.718191
MIR141	0	0	0.417049	0	0	0	0	0	0	0	0	0	0	0	0	0	0.509375	0	0	0	0	0.435125	1.25023	0	0	0	0	0	0	0	0	0	0	0	0	0	0.344968	0	0	0	0	0	0	0	0	0	0	0	0
MET	0.021992	0.116082	0.00651183	0.0197561	0.00608475	0.080226	0.0506428	0.0228566	1.65296	0.0475406	0.254271	0.0260767	0.0301432	0.127504	0.0971478	0.0070927	0.0486387	0.198359	0.149635	0.0671009	0.0237702	0.0068381	0.116016	0.0129289	0	0.065899	0.0581426	0.012488	0	0.0129787	0.011181	0.0490992	0.0468812	0.0368894	0.0445626	0.0308354	0.0363549	0.0606792	0.0626231	0.00650711	0.0414009	0.0931425	0	0.0293517	0.101369	0.0074829	0.0473448	0.109542	0.0187768
ELANE	6.96523	1.83514	0.971044	0.323961	2.763	5.32939	6.61741	6.17142	4.27099	0.837132	6.53702	11.4477	6.9136	7.94445	0.562629	8.03263	9.79799	7.65989	2.9514	3.3104	2.97509	6.36334	5.07802	6.40017	6.19912	6.70552	8.40209	9.6422	6.52666	9.04119	5.98966	9.05257	10.8906	8.44085	11.0909	8.36017	7.81612	5.83248	2.46428	5.75221	10.6685	11.4455	7.36956	9.50842	3.69915	2.53779	8.51795	5.0799	4.20646
KDR	0.0788049	0.338839	0.0218533	0.0512768	0.0865015	0.00617209	0	0.0425492	0.0320131	0.61622	0.0533837	0.0147212	0.197143	0.0551525	0.0445129	0.0394372	0.604623	1.41828	0.420077	0.0209146	0.0615601	0.007688	0.190628	0.0360591	0	0.451994	0.807576	0.0070354	0.0316409	0.172533	0	0.262471	0	0.0277458	0.219883	0.0617519	0.0350604	0.267806	0.161555	0.179106	0.418742	1.35992	0.0892574	0.0110732	2.29889	0	0.548666	0.150028	0.0210998
MDM2	3.27828	2.68185	3.217	3.21599	3.25871	3.28151	4.53799	2.85854	3.9614	4.07232	3.23524	2.97105	3.44304	4.04469	3.51314	3.19943	3.20464	3.03617	3.36186	3.36915	3.3431	4.18517	2.98511	3.60848	4.94439	3.13377	3.56668	3.08178	3.33922	2.84105	3.54651	3.26357	3.41377	2.61644	3.23246	2.85861	3.38093	5.29348	3.07277	3.09783	3.02103	3.01391	3.68891	2.44069	2.82602	3.07262	3.75579	3.0183	3.02372
PRKCI	3.219	3.02335	2.49694	3.82825	3.14633	3.51922	3.15291	2.70273	3.96906	4.12269	2.97209	3.20314	2.58897	3.04837	3.27996	2.90755	2.98197	3.15841	3.12452	3.52153	3.41905	2.12462	2.66894	2.93032	2.65598	2.89643	3.28458	3.01942	3.40834	2.88713	3.65942	3.01561	2.82578	2.41922	2.93138	3.14346	3.54274	2.44068	2.52559	3.30608	3.1099	2.95106	3.23898	2.3769	2.7195	3.37244	3.15923	3.19781	2.71882
NFE2L2	3.89567	3.92909	4.33437	3.87085	3.72201	3.82229	3.92682	3.12754	4.14714	4.02857	3.57542	4.35813	3.95764	3.99803	3.91617	4.2929	3.98137	4.91367	3.8664	3.36802	4.3933	3.84311	4.23852	4.12278	3.9766	4.18423	4.48436	3.39414	3.69279	3.76006	4.52335	3.83504	4.1148	3.57358	3.59817	3.65334	3.72128	4.10339	3.68287	3.77481	4.3407	4.19579	4.09887	3.45433	4.18927	3.46391	4.02604	4.31088	3.99639
RB1	4.14127	3.68577	4.49113	4.02749	4.48249	2.84247	4.77497	4.08319	5.02141	5.11433	4.00662	3.3635	4.07587	4.08686	4.14752	4.27546	3.4615	4.63818	3.65563	3.76272	4.29848	4.23371	4.51938	4.20604	4.60022	5.47086	5.01106	4.87384	4.82678	4.56713	4.16246	4.86417	3.79327	3.10513	3.71133	4.90943	4.81809	4.10268	4.31148	4.24414	3.34936	3.38932	4.68311	3.00078	1.43788	3.65333	4.11893	3.83692	3.97027
FGF2	0.0453284	0.261803	0.0727253	0.15653	0.200758	0.0560396	0.112347	0.0776598	0.195476	0.498467	0.0971384	0.10541	0.150145	0.0840664	0.110508	0.140659	0.250959	0.170301	0.250047	0.012917	0.298816	0.0351748	0.100979	0.104097	0.154578	0.0154843	0.312804	0.0884487	0.154024	0.0531883	0.122894	0.0819497	0.111127	0.0570871	0	0.210536	0.0848849	0.0766253	0.111913	0.117085	0.0550416	0.0329424	0.208926	0.0304834	0.590253	0.168983	0.0731237	0.744129	0.131293
HK2	3.6211	2.69059	3.8439	3.88821	4.53392	4.44791	4.06099	4.36454	3.07723	3.62056	3.0404	4.49627	4.19238	3.66194	4.52667	4.22939	4.12965	3.73537	3.18303	3.69456	3.65489	2.46382	3.02962	4.62057	2.86373	3.90717	4.12805	5.13002	3.93642	4.42535	3.44721	4.88172	3.87776	2.14968	4.68478	5.31521	4.51645	3.07263	3.12718	4.93202	4.29569	4.2218	5.01787	2.30815	3.9268	4.26255	4.44937	3.15412	3.81429
KL	0	0.473871	0.053513	0.00920186	0.114206	0.0818601	0.217578	0.0212261	0.230945	0.0749221	0.00839098	1.24563	0.749293	0.0230145	0.107797	0.0390617	0.363362	0.582514	0.567368	0.555817	1.03998	0.0834246	0.0639681	0.0268691	0.475633	0.0103928	1.54341	0.0847667	0.0390683	0	0.0385474	0.148533	0.166874	0.148182	0.416661	0.0258027	0.0852965	0.137076	0.0969131	0.0180461	0.992848	0.128093	0.0637065	0.0407025	0.082254	0.129767	0.0221646	0.199861	0.101586
CRYAB	0.0380536	0.103066	0.0593305	0	0.095776	0.0986304	0.0637938	0.103126	0.112372	0.107989	0.0949713	0.0450753	0.0912763	0	0.112104	0	0.128042	0.435435	0.13104	0.124821	0.190705	0.0622469	0.175706	0.014987	0.027758	0.116812	0.159129	0.0709711	0.0326257	0.0737021	0.0511644	0.0706613	0	0.0977489	0.0345823	0.0427461	0.235872	0.151514	0.141333	0.0592883	0.158062	0.426357	0.178444	0.0672046	0.203015	0.0845046	0.223669	0.0756407	0.0289396
EPHB6	3.35881	3.72467	3.24118	3.42395	2.76419	2.59439	3.18744	3.7821	1.87071	4.67791	3.12168	2.94196	3.53848	2.8959	2.26664	2.86785	3.50645	2.44044	2.85762	3.31026	4.01825	3.32821	3.39077	4.17074	2.6405	3.09028	4.44841	3.2239	2.44116	3.16952	2.72694	3.15282	3.57297	4.11192	3.86394	3.76366	2.63558	2.33644	3.42223	1.73315	3.31232	3.84111	3.428	3.39233	1.54315	3.12084	3.64755	3.34803	3.84659
IQGAP1	4.75815	4.49048	6.03059	3.8004	4.63807	5.4203	4.43261	4.15818	4.98428	4.58997	4.42806	4.04897	5.60451	5.7712	4.74568	6.07619	4.2991	4.64703	3.68755	4.5122	3.72087	5.79155	5.01795	6.00478	6.06224	4.81083	5.80904	5.24166	5.63588	5.33982	3.82723	5.75743	5.70653	3.8403	4.8528	5.15496	5.12176	6.30843	5.39365	4.57797	4.02669	4.21723	6.37042	4.06805	6.00224	4.34236	5.17464	3.49851	5.26465
LTF	3.41778	2.93593	0.220272	0.185378	2.6971	0.105438	0.0533629	1.17171	3.13272	2.93194	3.4936	0.647832	4.42942	0.0935629	0	3.38441	7.52246	5.26103	1.47177	0.229173	0.0391861	0.268716	0.344676	1.28674	0.0198843	2.07395	6.05236	1.3499	1.22136	0.482232	0.0184846	2.30588	0.285665	0.297412	0.37254	0.118936	0.484181	1.29606	0.616427	2.73645	2.14145	0.951141	2.49632	5.36487	1.87205	0.0845162	0.0393442	0.196768	0.139239
SDCBP	5.35865	4.87351	5.99821	5.72591	5.10718	5.45142	5.22451	3.26226	5.44593	3.67202	5.19462	5.24565	5.73921	5.9204	5.13762	5.50963	6.22386	5.70795	4.28309	4.91236	5.20057	5.45588	4.82715	4.91975	5.23952	5.26973	5.3252	4.47183	5.35952	4.89188	5.49633	5.45503	5.50776	5.16333	4.56396	4.46313	5.28096	6.29505	4.93421	5.60162	5.01003	4.94498	5.55112	4.60379	5.77117	4.89453	5.36182	5.13055	5.62031
SPIB	1.84349	1.68589	1.14078	0.78699	0.289695	0.256184	1.28482	0.838117	0.478879	0.445711	0.858312	0.920064	1.0975	0.588106	0.498064	1.66527	0.969703	2.11819	1.01313	0.446723	0.541272	0.49182	4.18672	2.83194	1.14058	2.97388	1.15358	0.571441	0.405115	0.3918	0.393326	1.61848	0.770623	0.737397	1.59055	0.700598	0.391442	0.750836	0.419391	0.375531	1.03299	1.91761	2.27075	0.357972	0.12193	0.348928	0.689333	0.767186	3.82968
MGAT5	3.14045	3.02863	2.84042	3.64201	3.4561	3.86343	2.9765	3.13629	3.26355	3.97087	3.03613	3.46797	3.01905	3.19469	2.60848	2.98247	3.35259	3.74997	3.34146	3.16508	3.46141	3.25488	2.94694	3.49554	3.58793	3.30956	3.8597	3.76763	4.18801	3.46036	3.04653	2.99532	3.06404	2.2728	3.36538	3.45503	3.72699	3.44331	3.48629	2.95651	2.63965	3.12171	3.22739	3.04676	2.68395	3.47034	3.75214	3.26045	2.98603
ABHD2	5.38861	4.53599	5.25315	4.29928	4.62744	5.66207	4.95356	3.76215	4.60725	4.79908	4.16028	3.6604	4.51448	4.41491	4.26553	4.40148	4.74876	4.69331	4.97079	4.88156	4.98233	5.02795	3.81325	4.95864	4.46527	4.42349	4.71352	4.30303	5.00953	3.66933	5.52987	4.82517	4.01758	3.59686	3.85346	3.70768	4.29164	5.02894	5.81245	5.08557	2.99866	3.3543	4.82612	3.83368	5.04033	5.45088	4.85007	5.76431	4.46822
TRIM31	0.0327211	0.0227435	0	0.0131431	0.0120909	0	0.00930016	0	0.0142581	0.495476	0.023874	0.101163	0.0100737	0.048932	0	0	0.0163243	0.0504318	0.0387206	0	0	0	0.039546	0.025631	0.137557	0.141962	0.0130673	0	0.0140914	0	0.0221792	0	0	0	0.0297312	0	0	0.0136467	0	0.0257418	0	0.0211318	0.0231038	0.0195485	0.185632	0	0.0315976	0.0264176	0.0124902
MIR1827	1.80535	0.898514	1.5654	0.9967	1.50121	1.6155	0.434792	2.15662	1.66019	2.03903	2.06215	2.30753	0	1.52417	3.53114	2.24365	1.7972	1.2934	0.990057	1.74136	2.37788	0.598844	0	2.29259	0.539421	1.08728	2.68776	2.62713	1.87538	2.14572	0.507179	0.554459	2.67021	0	1.93771	2.09602	2.18687	1.35085	2.80843	0.984835	2.05404	3.41	0.909155	1.68965	0	2.13056	2.20564	1.00362	1.2742
PDGFRB	1.5554	1.15303	0.584688	0.525762	0.932615	0.358388	0.817519	1.30144	0.58667	1.19448	0.352606	1.76045	0.994645	0.484094	0.0582751	1.01836	1.51884	2.32188	1.93035	0.146287	0.608154	0.488495	1.76539	0.636815	0.738927	1.65116	0.93723	1.49892	1.12523	0.416	0.452408	1.16751	1.5866	0.178844	1.06215	1.97988	0.277555	1.0087	0.479007	0.651397	1.00357	2.96288	1.2481	0.274373	0.169528	0.682753	1.66771	1.23273	0.336527
TLR3	0.734051	0.273622	0.173596	0.566702	0.0378	0.669611	0.0434844	0.0396468	1.32713	2.45129	0.461745	0.466628	0.243899	0.42718	0.494007	0.383383	0.660199	0.603122	1.49865	1.36301	0.0330712	0.130271	0.21501	0.490791	0.0374484	0.283864	0.325988	0.19612	0.0367506	0.443057	0.402412	0.362211	0.0490405	0.194845	0.0843456	0.912274	0.0487214	0.150461	0.95638	0.20935	0.10885	0.23685	0.365756	0.147413	0.169063	0.569979	1.0422	0.996993	0.242269
ROCK1	4.26825	4.07334	4.31369	4.45984	4.29512	4.17357	4.11037	3.23246	4.81364	4.82878	3.78718	3.87247	4.07337	4.30078	4.94995	4.33528	4.07764	4.22849	4.02343	4.17943	4.30066	4.25113	4.04336	4.08247	4.82609	4.52833	4.65193	4.22765	4.45131	4.08576	4.59057	4.4815	4.46673	3.06254	4.29798	4.1559	4.54804	5.11206	3.73435	4.43724	3.77867	3.87821	4.45198	3.63812	4.03536	4.08967	4.46071	4.23688	4.09164
CPT1A	5.87481	6.79072	5.28338	6.46832	6.30278	6.45423	6.15537	6.01391	5.02993	6.34896	5.35375	5.15479	5.31871	5.05252	5.53192	5.15749	5.72667	5.67354	6.4664	5.91081	5.72322	5.58919	5.34941	5.8029	5.22484	5.91711	4.51511	5.94524	5.86402	5.51094	5.9732	5.70585	5.16047	5.02626	5.12232	5.61591	5.64964	5.01821	6.98296	5.81205	4.04325	4.5414	5.2125	5.06156	6.15116	5.98686	6.21793	6.06155	5.76064
NRAS	4.74467	4.75531	4.39953	5.16168	3.56066	4.53769	4.4706	3.94815	5.22755	5.10467	4.12596	4.131	4.3495	4.45864	4.5004	4.52335	4.10607	4.97822	4.29614	4.82039	4.40564	4.24872	3.7881	4.41921	4.76648	4.91923	4.51715	4.7999	4.95066	4.72984	4.93392	4.6672	4.32161	3.54866	4.76674	4.79403	5.23523	4.63022	4.76915	4.85554	4.4614	4.16426	4.78473	4.40411	5.34639	4.60681	4.52145	4.52698	3.89059
PLAT	0.171997	0.226197	0.0206763	0.245811	0.18822	0.0174435	0.0295967	0.183811	0.296454	0.146523	0.129064	0.146262	0.191847	0.119017	0.245154	0.17766	0.249054	0.464716	0.665439	0.0712657	0.0985248	0.0849344	0.876741	0.144464	0.0566909	0.24156	0.22063	0.787314	3.26198	0.946743	0.0584907	0.102513	0.129192	0.0392045	0.115586	0.340896	0.0709501	0.290861	0.0746194	0.157555	0.207672	0.369178	0.224221	0.11124	0.113029	0.0237423	0.106859	0.161505	0.0133394
CASP10	3.38627	3.54489	3.62783	2.48285	3.05695	4.1892	4.05138	3.27931	4.03127	3.27918	3.16493	3.13512	2.99575	3.47334	3.65789	3.34079	3.57108	3.64518	3.55708	3.92317	4.02391	3.49594	3.09752	3.84942	2.89879	2.46401	3.3084	3.24256	4.13859	3.58101	3.33472	3.07048	3.61295	3.2901	2.63503	3.5305	3.29995	3.75399	4.32179	2.74953	2.68023	2.73778	3.47469	2.55604	4.5864	4.03876	3.25252	3.81001	4.03643
PAK4	2.01952	1.65593	2.19689	1.63259	2.60218	2.33861	1.99342	2.65243	1.86394	1.36021	2.16009	2.63572	1.92958	2.13171	1.41931	1.92364	2.81752	2.48995	4.34627	2.3739	2.23539	2.08356	2.06994	2.13377	2.07809	2.64635	1.82582	2.46008	2.26562	2.28292	2.17801	1.99109	2.44467	2.48084	2.40696	2.12709	1.82339	1.73053	2.27999	1.58454	1.86291	2.18529	1.92569	2.02036	2.13992	2.26052	2.35618	2.20425	1.94371
VEGFA	1.43036	0.958936	0.646061	0.0908701	2.07378	0.568975	1.54677	2.40166	1.1435	0.723608	0.649056	2.63745	1.22577	1.21308	0.192448	0.756959	2.86949	2.80508	1.14004	0.401512	0.933767	1.04847	1.22437	0.57703	1.73202	0.705503	1.69994	3.01426	3.21196	3.03411	0.628982	1.11023	3.23827	0.967829	2.70347	3.71303	2.17035	1.49718	0.329941	0.328583	3.53851	3.23598	1.02017	0.345605	2.29827	0.314412	2.5294	0.708194	1.45315
ZEB1	3.48982	3.58068	1.99611	1.78022	1.29159	3.79982	2.59331	1.40147	3.85595	4.41005	2.2889	3.59719	1.82023	3.04052	1.34585	2.68667	3.09631	3.10676	3.09439	4.14379	3.02306	1.63197	2.63702	2.89936	0.680804	3.34446	2.50625	2.36236	2.76217	0.70701	2.88522	3.04572	2.95934	2.1202	2.66922	1.24992	1.51606	0.993079	4.13802	0.408603	2.85682	3.34135	1.89967	1.75728	0.645504	2.89379	1.31796	3.09694	2.66144
PIN1	2.97583	2.84074	3.04259	2.87634	3.20509	3.43219	3.23178	3.22948	3.27864	2.47396	3.70654	3.2153	3.73784	3.08874	2.8418	2.57089	3.13586	3.07786	3.40818	3.18794	2.69126	3.58305	3.22463	3.37668	3.54504	3.66425	3.0735	3.07008	3.29047	2.92289	2.7386	2.85439	3.43545	3.75341	3.06776	3.53043	2.63872	2.87954	3.02512	2.64225	2.95214	3.18282	2.67964	3.86394	3.15019	3.18425	3.32823	2.87009	3.48584
UBE2C	3.27514	4.05439	1.8179	2.47336	4.31977	2.68376	2.68304	4.81829	3.59507	3.07271	5.37585	3.77914	3.87342	3.11266	2.59282	4.74502	3.84678	5.07826	4.5084	3.14429	3.83244	3.22861	4.35792	3.67815	3.63636	3.66798	4.9733	3.81373	3.27616	3.86078	3.16406	4.13003	3.31018	1.95699	3.72464	3.97579	3.75399	3.18567	3.30647	4.20703	2.7905	4.18566	4.88859	3.92719	4.81859	2.87164	3.83176	3.81824	2.70515
YWHAZ	5.44012	5.22662	5.87423	6.25323	5.69295	5.98136	5.81021	5.49309	6.11441	5.50797	5.53922	5.98291	5.8739	6.00018	5.7476	5.93864	5.59291	5.94649	5.2822	5.55446	6.00102	6.12113	5.99924	5.68947	6.09442	5.73845	6.17566	5.52389	6.22939	5.56875	6.03909	5.88701	5.90427	5.91226	5.89725	5.22771	6.23107	6.15408	5.77583	5.91542	5.67276	5.8088	6.11297	5.51951	5.95358	5.62609	5.405	5.82055	5.28482
TWIST1	0.0190556	0.0585842	0.0445012	0.0452002	0.0416182	0.0922034	0.52463	0.0263474	0.0247024	0.0925901	0.249249	1.4016	0	0.163465	0.0343816	0.0484145	0.0282673	0.128012	0.0666746	0	1.40539	0.0467004	0.0230528	0	0.0207631	0.124196	0.130833	0.0427849	0.0720379	0.0444479	0.0757051	0	1.74994	0.103972	3.36524	0	0.0180965	0.0698084	0	0.022406	2.52043	1.73758	0.0399386	0.0668708	0	0.0257448	0.0275101	0.132774	0.258881
ELK1	3.17161	3.19367	3.40929	3.31324	3.68029	3.9078	3.51963	4.16221	2.88468	3.0491	2.71826	3.75656	3.41295	2.90152	2.83441	3.1673	3.30431	4.04337	3.55504	3.64318	2.98497	3.23945	2.86459	3.69626	3.331	3.46423	3.26792	3.48916	3.21271	3.2731	3.29985	3.22567	3.62868	3.16322	3.82699	3.24701	3.05883	3.36788	3.71107	3.27094	3.01621	3.24387	3.35923	3.39547	4.08201	3.45476	3.47565	3.4451	3.26477
BMP6	0.159214	1.52559	0.171206	3.01976	0.267034	0.558738	0.383245	0.570667	0.20358	1.94855	1.26325	0.339762	0.371869	0.582239	0.454577	0.743172	0.99886	0.886107	2.20081	0.83032	0.506537	0.25396	1.05914	0.387036	0.264735	1.28286	0.417405	0.20675	0.120838	1.26735	0.109425	0.599293	0.545938	0.360837	0.73285	0.311134	0.393798	0.745686	0.836969	0.350166	0.337155	1.12568	0.517101	0.230783	0.579878	0.195143	0.373676	0.956022	1.05904
PRDX4	3.79604	3.28495	3.34079	3.43122	3.77975	3.92125	2.93809	3.99782	3.43676	3.5983	4.49282	0.800521	3.35566	2.85911	2.10307	3.81951	3.13337	5.07231	3.89452	2.83357	2.85679	3.26402	3.71236	3.82565	3.67218	3.25448	3.17917	3.75685	4.07191	3.93219	3.6675	3.80306	1.19038	2.11612	0.946955	3.44461	3.56841	3.37185	3.60075	2.9071	1.92537	3.12522	3.63451	3.36749	4.39515	4.1257	3.84824	3.6212	2.95983
BNIP3	2.44485	2.23699	2.12338	2.83604	1.74716	2.80535	2.16984	2.15056	3.01122	2.87279	2.92519	2.73877	2.5634	2.65162	2.21779	1.73072	3.48753	2.47	2.5624	2.60375	2.29996	2.41495	1.98025	2.20418	1.9613	3.02668	1.84584	1.84578	3.0484	1.82082	1.84974	2.17206	2.90216	2.45473	2.67088	2.43927	2.4992	2.15666	2.07768	2.81956	3.22264	3.00681	1.94456	2.4482	2.72304	1.90065	3.13091	2.48611	2.4799
BNIP3L	4.96695	5.21101	4.74273	6.10869	4.22473	5.62255	4.84683	3.70586	5.21033	5.85713	4.1261	4.65903	4.98741	4.81479	4.18146	4.37502	5.38465	5.24327	4.96796	4.61877	5.81009	3.96828	4.3889	4.05009	4.06678	4.54826	4.74343	3.89749	5.36989	5.00365	4.91651	4.35991	3.7859	4.5326	4.5805	4.65855	4.75049	4.91561	4.86808	4.78141	4.67722	4.23099	4.85649	4.38522	5.85117	5.37138	4.36591	4.71572	4.69208
KDM3A	3.60744	3.32328	2.81701	3.36468	3.60375	3.47452	3.11309	2.09852	3.64547	3.76914	3.28948	3.38872	2.88708	3.38652	3.93862	3.16642	3.70434	3.48274	3.22802	3.66367	3.42136	2.90788	3.30451	3.15455	2.87676	3.52125	2.90659	3.1368	3.61738	3.08894	3.16053	3.2418	3.49566	2.40992	3.63166	3.25976	3.45723	2.64643	3.29998	3.59513	3.51604	3.69174	3.18468	3.03369	3.81071	3.14895	3.61631	3.40926	3.30755
LMO3	0.171669	0.0195964	0.20797	0.117787	0.234798	0.167139	0.20339	0.0466195	0.14535	0.0419831	0.37389	0.45297	0.107278	0.75267	0.358097	0.241769	0.08771	0.0899039	0.0443479	0.268706	0.764256	0.319075	0.136013	0.0863904	0.122969	0.0992264	0.0268633	0.237307	0.0384826	0.124098	0.237165	0.184546	0.446024	0.370671	0.497929	0.161538	0.657468	0.0914493	0.636933	0.27218	0.332791	0.444317	0.100641	0.49427	0.0113225	0.160458	0.00548865	0.0759823	0.0592295
ZNF32	3.87809	3.64158	2.9812	3.70879	3.60242	3.65159	3.99685	1.98129	3.67082	3.87549	3.204	3.51578	3.19516	3.2766	3.39592	3.08559	2.87398	3.86099	3.78089	3.69898	3.04869	2.7898	3.84658	3.25373	3.57507	2.88045	3.17648	2.94706	2.71841	3.70091	3.47826	3.44704	2.95345	3.98482	3.3176	3.31598	3.53346	2.64172	3.723	3.64392	4.14871	3.80398	2.70132	3.53339	3.27722	3.70675	3.47046	3.3934	3.32974
MIR200B	0	0	0	0	0.342581	0	0.270182	0.419602	0	0	0	1.59651	0	0.450196	0.527795	0	0.446148	0.359787	0	0	0.434201	0.379938	0	0.362245	0.339705	0	0	0	0	0	0	0	1.45704	0	0	0	0	0.381477	0	0	0.337697	0.955921	0	0	0	0.730782	0	0	0
NA.1	NA	NA	NA	NA	NA	NA	NA	NA	NA	NA	NA	NA	NA	NA	NA	NA	NA	NA	NA	NA	NA	NA	NA	NA	NA	NA	NA	NA	NA	NA	NA	NA	NA	NA	NA	NA	NA	NA	NA	NA	NA	NA	NA	NA	NA	NA	NA	NA	NA
MIR525	0	0	0	0	0	0	0	0	0	0	0	0	0	0	0	0	0	0	0	0	0	0	0	0	0	0	0	0	0	0	0.402882	0	0	0	0	0	0	0	0	0	0	0	0	0	0	0	0	0	0
TUBB3	0.0433565	0.0450211	0.0205929	0.0918357	0.0569916	0.00871265	0	0.117137	0.0450258	0.0325434	0.101961	0.120277	0	0.0647195	0.077708	0.190244	0.0889053	0.0893247	0.0309811	0.0391503	0.0862295	0.144944	0.253614	0.0204893	0.0472063	0.420408	0.051445	0.0775905	0.401764	0.156876	0	0.141614	0.188972	0.00986135	0.147957	0.0771374	0	0.125661	0	0.030758	0.0376398	0.205474	0.0366983	0.419503	0.0347082	0.0236467	0.110382	0.0419339	0.0198825
PTPN11	4.62215	4.51034	3.78795	4.72505	4.69645	4.22094	4.19272	3.73881	4.74282	4.87566	3.86326	4.10854	3.93915	3.88358	4.24616	4.16102	4.18934	4.92125	4.69497	4.95175	4.28482	3.87307	3.96556	4.36266	4.34978	4.67713	4.44192	4.84021	4.70709	4.54499	4.78002	4.35242	3.79985	2.78889	4.23923	4.72015	4.96597	3.90399	5.21027	4.51787	3.85999	3.71893	4.39574	3.36056	4.31493	4.55545	4.60723	4.39562	3.76608
SLC2A1	3.27734	5.38667	2.68459	2.7525	3.88197	3.29379	3.45018	3.17605	3.21418	4.96289	3.12561	4.27289	4.84427	2.35066	2.76591	2.9026	4.42303	6.58756	5.27864	2.97859	2.38751	3.0713	3.76074	3.41304	3.49748	3.98058	3.11937	2.87709	3.55155	2.5495	2.32716	3.33545	3.78203	2.56137	4.29108	2.55799	2.46217	3.79857	3.76097	2.80998	3.6046	4.02189	2.5563	3.68405	4.01055	3.01173	3.226	2.91011	3.62255
HMOX1	1.68444	2.23679	5.21207	2.7507	0.716557	1.35732	3.55122	1.52864	2.57969	2.81501	0.874898	0.539787	3.19	3.72472	0.594244	3.06787	2.56905	4.87357	3.39636	0.281372	0.313956	3.11469	3.66011	3.83581	3.8263	2.65637	1.71085	1.4888	2.6308	1.9815	1.04185	2.90637	2.61437	3.95571	1.47254	1.53451	0.666172	5.76717	0.707508	0.925772	1.66298	1.22938	3.23627	1.22866	2.59594	1.68119	0.424115	2.7625	3.99579
PRKACA	3.07567	2.97223	4.48976	2.55868	3.07435	3.08657	3.20179	3.26011	3.5023	2.67331	2.61847	3.03173	3.79543	3.51693	2.24087	3.72758	3.40129	3.07027	2.8507	2.8713	2.72981	4.0259	3.32068	3.87886	3.47519	2.8797	3.45516	2.92003	3.50624	2.60241	2.90135	3.51738	3.34894	4.04775	2.9409	2.70583	2.63421	4.36253	3.29639	2.57318	2.67988	2.85257	3.95495	2.8638	2.95757	3.16343	3.01045	3.04836	4.1739
CBL	4.22816	4.78725	4.76581	4.54455	4.90192	4.11227	3.86091	4.5911	5.22622	4.61511	3.48005	3.62865	4.92895	4.28445	3.64531	4.38151	4.33922	3.5609	3.93259	4.36959	3.73342	4.78138	4.04169	4.86271	5.50787	4.03893	4.78766	4.7867	4.90725	4.09949	4.26996	4.64026	4.41704	2.93783	3.78474	4.88774	5.21033	4.8414	5.45261	4.4054	3.42543	3.45222	4.96304	2.80698	2.42941	4.24262	4.62573	4.19683	4.09948
PAK3	0.0150481	0.0615356	0.0133036	0	0.00415625	0.011219	0.00319489	0.00523258	0.0243532	0.0280052	0.0204844	0.0266943	0.00691417	0.0337263	0.0538596	0	0.0443344	0.0433278	0.0441615	0.00849948	0.0162679	0.00932735	0.058361	0.0176218	0.0204692	0.0101919	0.0311602	0.00853601	0	0.0308159	0.0114473	0.00425523	0.271032	0	0.0051397	0.0211196	0	0.00937021	0.0162907	0.013294	0.0162904	0.0217278	0.00398641	0	0.0112743	0.00511205	0.00546527	0.00911068	0.0170995
PIK3R2	0.35707	0.423779	0.657347	0.50056	0.381287	0.426566	0.353816	0.430666	0.328956	0.376137	0.476272	0.66154	0.427537	0.302906	0.30852	0.468229	0.721676	0.761238	0.68646	0.381882	0.67311	0.615646	0.382955	0.340413	0.413837	0.464413	0.353069	0.225376	0.435946	0.381061	0.446958	0.396654	0.425038	0.688118	0.42403	0.432511	0.29501	0.463355	0.436966	0.34972	0.493313	0.524189	0.381549	0.864578	0.192904	0.275448	0.501069	0.576243	0.44371
CASP6	3.69025	3.52641	3.15371	5.15647	4.09012	4.64881	4.17761	3.58863	3.3527	4.84418	3.78932	4.34887	2.9625	3.59307	5.20985	3.4985	3.70818	4.24985	3.67568	3.84547	4.15635	3.03769	2.84841	3.46949	2.81177	3.09491	3.1745	4.09274	3.90863	4.24214	4.32376	3.52203	3.53972	3.63045	4.26322	4.36986	4.27388	2.85642	3.68175	5.05866	4.6977	4.6684	3.36808	4.47707	3.64293	4.2714	4.08008	3.51807	3.59945
PPP2CA	4.63048	3.64269	4.55322	4.55559	3.50033	4.5977	4.59337	3.60947	4.87891	3.8612	4.56674	4.11275	4.4064	4.68584	4.56107	4.62377	4.04047	4.10434	4.25051	4.38924	4.4178	4.58129	4.45777	4.29011	4.96343	5.06213	4.95759	4.23543	4.3517	4.43721	4.9026	4.8567	4.40314	4.23744	5.01039	4.33214	4.84942	4.7335	3.4655	4.76042	4.44859	4.40012	4.6518	5.30925	4.67805	4.42392	4.38335	4.43286	4.25897
CD36	4.50899	3.52437	6.34702	0.989209	2.65133	5.4964	4.363	1.27205	3.42115	3.59423	1.66017	1.72548	6.11946	5.36531	1.38636	3.9995	3.3787	4.84984	3.76381	0.187196	1.0692	3.53068	4.19561	3.9362	2.64725	3.418	4.01022	2.71298	2.84975	0.61484	3.36177	4.77488	2.99288	3.55728	1.10172	0.719364	0.778571	6.24457	1.54303	1.49965	2.04667	2.87935	4.97531	1.32572	7.20788	4.08705	1.01819	3.94598	5.43305
CDH3	0.0967391	0.0573224	0.0291709	0.0442222	0.0340099	0.036776	0.0262056	0.092334	0.0943195	0.126758	0.00680694	0.0510644	0.00571909	0.0371363	0.09864	0.0395807	0.0814157	0.0709605	0.114022	0.0553117	0.0617824	0.00771628	0.0373904	0.0290246	0.0203102	0.0168149	0.014806	0.0140882	0.0317563	0.0787491	0.0619978	0.0348113	0.0178186	0.0209356	0.0502021	0.0552188	0.0751849	0.0307602	0.263397	0.00734289	0.0134822	0.0357547	0.0131422	0.0221429	0.0670451	0.0251841	0.113155	0.0224937	0.021177
LRP1	2.87864	1.93741	5.65809	0.802088	0.879276	0.614034	3.32244	0.450799	2.65544	2.45959	1.02971	0.774032	5.20066	4.7228	0.530761	4.79122	2.06657	3.06234	3.30672	0.172731	0.287729	4.12258	3.53945	5.71703	2.79544	3.06837	2.39884	1.75579	1.9935	0.941335	1.42397	4.919	1.40967	2.90465	1.01743	0.82304	0.293195	6.42698	0.429242	1.10727	0.649798	1.78153	5.64911	0.967725	1.94614	2.08194	2.74823	2.01464	5.41919
PTK6	1.40154	1.37379	2.58566	2.20186	0.909414	0.532245	1.12377	1.56462	1.78337	1.91318	1.38472	0.969701	1.44075	1.50315	0.377933	1.29155	2.69761	1.11293	0.976748	1.76485	1.05976	2.4277	1.42109	1.20888	2.76342	1.41256	1.04934	1.1606	1.24229	0.922772	0.586643	1.1232	2.03207	1.26436	0.510556	1.02291	0.344759	2.47512	2.22718	0.473746	0.610218	0.614455	1.28271	1.68953	0.706111	0.853882	0.675937	1.13555	1.11648
EEF2K	3.20377	3.20732	3.40284	3.65181	3.79527	4.36952	3.53017	4.73904	3.07462	3.98898	3.1767	4.10471	2.69714	3.19784	3.08459	3.89579	3.74026	4.04269	3.66248	3.77801	3.63646	3.19346	3.28661	4.00885	3.49636	3.36108	3.56905	4.41485	4.9108	4.10299	3.86476	3.79484	4.65403	2.6829	3.94442	3.9405	4.19736	3.04097	3.88734	3.52981	3.5072	3.65789	3.72707	3.05205	3.31142	3.95337	4.49196	4.00732	3.07052
GLO1	5.13947	4.85447	4.21096	5.76508	4.69803	4.64611	5.07502	4.13487	5.38687	5.76545	5.38032	4.59036	4.78119	4.21414	4.4046	4.75665	4.3392	5.23927	5.13778	4.98989	5.06248	5.70446	4.99775	4.47875	5.16019	6.49295	5.39084	5.02386	6.16493	4.94185	5.21661	4.40268	4.08302	4.65144	4.19425	4.97093	5.11061	4.32386	4.82444	5.39764	4.29703	4.22132	4.77919	5.81766	6.32335	4.71302	4.82732	4.80363	4.71417
PAK2	5.07374	4.8613	5.47108	5.69323	5.49457	5.64495	5.314	5.67447	5.80748	5.97329	4.86131	4.78974	5.32133	5.44913	5.43415	5.69665	5.22556	5.08122	4.93785	5.41566	5.22109	5.31867	4.8561	5.33242	5.43008	4.78303	5.80529	5.73891	5.54444	5.28496	5.84228	5.67871	5.24534	4.60688	5.00439	5.57847	6.02778	5.51731	4.41245	5.8905	4.94388	4.75115	5.98184	4.54733	4.70815	5.28712	5.6733	5.28359	5.08506
LPAR1	2.62303	3.01259	0.957358	0.118447	2.17156	0.678115	0.38717	0.453517	0.401401	0.294903	1.04522	0.177849	0.822348	1.1261	2.40361	3.07015	1.94608	1.10368	0.478256	2.05814	0.768006	1.02665	0.210977	2.67657	0.831431	0.585899	0.594945	0.0825044	0.0238731	0.0327238	0.275824	3.09855	0.795795	1.1788	1.12813	0.0619505	0.0524449	0.255651	1.86287	0.0219088	0.0596785	0.407165	3.27583	0.549733	0.167611	0.543659	0	0.35922	1.0248
SFN	0.19326	0.173329	0.744563	0.42559	0.319527	0.242403	0.27242	0.422908	0.213614	0.237135	0.532918	0.28551	0.314921	0.352946	0.290271	0.395471	0.602233	0.490467	0.571104	0.272287	0.614975	0.382971	0.843058	0.338017	0.510145	0.151558	0.227206	0.158205	0.336689	0.254299	0.16924	0.547467	0.403712	1.08943	0.385916	0.21572	0.159169	0.356114	0.271423	0.254413	0.484605	0.21171	0.175935	0.66407	0.451789	0.353104	0.470359	0.506566	0.246453
ADCY10	0.0560672	0.259081	0.189098	0.109758	0.189715	0.285173	0.218912	0.110156	0.249422	0.260089	0.230138	0.24244	0.284371	0.212784	0.337501	0.365352	0.210715	1.02467	0.310549	0.103584	0.472294	0.156266	0.160082	0.128154	0.0476829	0.177592	0.323641	0.130531	0.0559774	0.121775	0.105446	0.11683	0.195567	0.0899622	0.17107	0.168454	0.223057	0.0693643	0.204892	0.108022	0.13769	0.117648	0.158591	0.033605	1.08417	0.154829	0.298087	0.159699	0.220612
TRAF2	2.84773	2.78737	2.77439	2.90865	2.91421	3.0216	3.05675	3.11292	2.76936	2.62496	3.14438	3.20189	2.86434	2.51794	2.5173	2.79257	3.57614	3.19437	3.32886	3.46668	2.71488	2.97891	2.79224	3.0181	3.02864	3.25582	2.94645	3.2535	3.9411	3.15682	2.55617	2.98373	3.10355	2.68367	2.8934	3.42036	2.66728	2.45792	3.03813	2.54778	2.666	3.01129	2.52397	3.17488	2.48386	2.92702	2.90824	3.03808	3.15863
PIK3R3	1.22349	0.259526	0.537269	0.26927	0.239608	0.457333	0.581806	0.235089	1.60957	1.05799	0.232812	0.287955	0.744361	0.594735	0.284938	0.398735	1.46975	1.05791	1.71545	1.4142	1.35151	0.768973	1.02439	0.201189	1.16661	0.346322	0.328947	0.384666	0.218949	0.25477	0.373651	0.21962	0.317044	0.183093	0.462014	0.37809	0.546555	0.875194	0.294561	0.47589	0.146224	0.38926	0.230546	0.225535	1.7177	0.223985	1.42771	0.387981	0.325425
RBL2	4.29361	5.10057	4.35616	4.89222	4.81232	4.73628	4.26739	3.33717	4.33285	5.16419	3.91045	4.26839	4.89985	4.48239	4.83203	4.18875	4.51236	4.75039	4.73544	4.27334	4.54923	4.53202	4.58245	4.44289	4.5932	4.16177	4.66774	4.59934	4.15791	4.38481	4.49844	4.5804	5.1341	3.21943	4.42444	4.36766	4.46052	4.58326	4.14839	4.57475	4.59598	4.58163	4.59466	3.43514	3.73187	4.21118	4.80797	4.85422	4.53583
SIRPA	2.95859	3.60744	5.86768	2.58761	4.47119	3.4081	4.88133	3.84023	3.01437	3.5851	4.24388	3.98192	5.77716	5.04248	1.83732	5.01602	4.65039	3.41061	3.29801	2.67496	3.23011	5.77541	3.12562	5.24777	5.95147	2.36985	5.52584	3.76295	3.56948	3.53988	3.72777	4.97986	4.58763	4.93513	4.05486	3.23105	4.00483	5.74869	3.57828	3.40686	3.67625	4.04707	5.36472	4.05525	1.93565	4.13968	4.02051	3.65989	5.43378
TNFRSF12A	0.386442	0.764752	0.499324	0.0976443	0.902525	0.750586	0.568001	0.721429	0.403789	0.934688	0.669466	0.731181	0.357803	0.33796	0.427517	0.712158	1.44341	1.6602	0.391999	0.827681	0.325513	0.625645	0.680301	0.970901	0.579528	2.20162	1.2373	0.565741	0.838803	0.584096	0.103111	0.514553	2.92693	1.8272	1.92903	0.480245	0.353576	1.1493	1.19437	0.567668	0.749473	0.970597	0.7742	2.36436	0.918502	0.0282969	1.81569	0.212974	0.778385
CEACAM1	2.01041	2.64077	0.608407	1.42582	2.41853	0.906429	1.08231	1.72221	2.42397	2.66501	1.15917	0.830738	2.32056	1.02166	1.79391	1.13717	4.65234	3.03054	1.8594	1.7272	1.55605	0.720529	1.69105	1.46206	0.750927	1.24474	3.4545	0.846076	1.25588	1.1472	0.242949	0.9986	0.433742	0.531604	0.689688	0.797232	0.76678	0.869595	2.98382	2.20532	0.557446	1.09294	0.885271	1.50693	1.58805	1.00995	1.39484	1.26031	1.19242
BAG1	3.4229	2.96091	3.33894	3.12007	2.82201	3.2638	3.31214	3.11126	2.85041	3.12798	3.24781	2.73963	2.88882	3.23775	3.45572	3.12171	2.75934	3.43987	2.70345	3.36072	3.01589	3.38797	3.27113	3.11063	3.70314	3.41555	3.07597	3.25107	3.10075	3.09001	3.30915	3.4582	2.86576	3.35302	3.25801	2.90066	3.51575	3.10246	2.96792	3.5054	2.82404	2.95815	3.01133	4.35183	2.68001	3.09549	3.14653	3.16151	3.03679
APOBEC3G	3.25389	4.35143	2.56748	2.71456	2.40109	2.89539	3.36359	2.68729	2.73519	3.32987	2.56315	2.35102	2.31437	2.58706	2.63557	2.58789	2.62705	2.97235	2.96126	2.64661	2.37121	3.12025	3.047	3.22279	2.8191	2.04377	2.0671	2.87344	2.42335	2.87325	2.22964	2.49454	2.0767	2.52269	1.78355	3.12947	2.46754	2.24087	3.07534	2.30056	2.14552	2.44548	2.85103	2.35627	1.64209	2.82933	2.17054	3.03011	2.63661
GDF2	0.0198106	0.0608729	0	0.0236784	0.0644042	0	0	0	0.0256793	0.0246485	0	0	0.018164	0	0	0.0253757	0	1.48601	0.156746	0	0	0	0.0475384	0	0	0.0267257	0	0.0224042	0	0	0	0	0.0283151	0	0	0	0	0	0.0285213	0	0.0633967	0	0	0	1.19083	0	0	0	0.0225062
MNX1	0.00925084	0.0191572	0.0108918	0.0220455	0.0101784	0.0091839	0.0156136	0.0505613	0.0820051	0.0229492	0.0300619	0.0109781	0.00847933	0	0.0496387	0	0.0805739	0.0214285	0.021844	0	0	0.0340414	0.0442851	0.0108368	0.0200958	0.0124958	0.0219187	0.0208585	0.0118638	0.0108786	0.027932	0.0207659	0	0.0103945	0.0374176	0.0104044	0.00878375	0	0	0	0.0298425	0.0177981	0.0194611	0	0	0.0249187	0.0527733	0.0222564	0
VPS37A	3.12596	3.26218	2.8603	4.1833	3.13129	3.14596	2.74312	2.63292	3.14753	3.5295	3.15154	4.11775	2.77747	3.51355	3.95942	3.37765	3.69731	3.23226	2.77498	2.87951	3.84444	2.63931	2.4629	2.92933	2.8338	2.73734	3.2969	3.10805	3.93837	2.85599	3.38753	3.26885	3.54045	2.21174	3.37645	3.0951	3.20176	2.90259	3.48488	3.47109	3.53154	3.62266	3.30495	2.19173	3.37591	2.88528	2.97974	3.12719	2.56019
COL13A1	0.00675329	0.114866	0.0237269	0.0241023	0.0221794	0	0.00571376	0	0.00876561	0.081989	0.0146961	0.00801549	0.00618963	0.0302213	0	0.0258298	0.0299087	0.0388383	0.10075	0	0	0.0166532	0.0324345	0.00791224	0.0146852	0.0450585	0	0.0228055	0	0.015842	0.0136497	0.00760787	0.0383017	0.0301194	0.00918699	0.0375875	0.0127957	0.0167296	0.0385796	0.00794666	0.00731257	0	0	0.0239535	0.0201188	0.00913763	0.029108	0.00815661	0.0229093
RAD9A	2.82674	3.82819	2.80967	2.5955	3.39794	2.96413	2.79241	2.96911	1.87232	2.59124	2.88794	3.14489	2.55091	3.23794	2.27324	2.49652	3.42305	3.17495	3.0431	3.40332	2.37537	2.71349	3.36016	2.93823	2.89389	2.58863	2.68513	2.89746	2.64037	2.68178	2.72303	2.73605	3.46077	3.2298	3.1294	3.13487	2.15483	2.5348	3.14809	2.42586	3.05484	2.8715	2.41662	2.98713	3.38371	2.79762	2.94366	3.37985	3.59735
IFI27	0.168442	0.710698	0.106732	0.108373	0.815939	0.216324	0.172224	0.844063	0.746141	1.02843	0.12757	0.406067	0.396778	0.222363	0.249959	0.293798	0.462893	2.49949	0.958271	0.131594	0.368912	0.255251	0.520347	0.341863	0.173659	0.877644	0.535899	0.217005	0.115922	0.224936	0.11001	0.287299	0.24717	0.704968	0.929945	0.387387	0.199766	0.490647	0.697087	0.243857	0.342842	0.758539	0.186005	0.231965	2.37694	0.328807	0.305613	0.603921	0.399132
ITPRIP	3.13154	2.79492	3.91081	2.50075	3.55783	2.13096	2.2104	2.90499	3.13101	2.7931	2.48232	2.71361	4.18143	3.03111	2.45424	3.42846	3.68707	3.89449	2.75452	2.84639	2.341	3.60033	3.35974	3.63639	3.98053	3.8256	3.51743	2.17034	3.19894	2.93541	1.42419	4.07876	3.32837	2.79084	3.52517	2.84687	3.1221	4.75864	2.56209	2.41649	1.94016	2.48805	3.32008	3.1966	3.12347	2.34315	2.84688	2.09363	3.11951
BCL2L15	0.581085	0.685095	0.586774	0.323244	0.232614	0.496014	0.708933	0.491034	0.981544	0.848319	0.537	0.546535	0.874387	0.803964	0.68823	0.606235	1.28029	0.944459	0.604334	0.464496	0.571411	0.654703	0.629405	0.425279	0.590795	0.507253	2.19736	0.420388	0.248204	0.504849	0.59347	0.55164	0.687707	0.305528	0.501369	0.425902	0.413609	0.51276	0.624572	0.710399	0.761749	0.806095	0.613774	0.595025	0.645787	0.516558	0.863472	0.53937	0.541544
SNAI2	0.146142	0.61278	0	0.136503	0.407001	0	0	0.046615	0	0.586815	0.0185258	0.0201504	0.231026	0.0254736	0.0607008	0.185001	1.12502	1.35434	0.731335	0.0750557	0.0244347	0.0209893	0.780302	0.0588713	0.018512	0.153322	0.708635	0	0.0432174	0.223109	0.0172083	0.513123	0	0	0.195532	0.0565595	0	0.901982	0.0721954	0.223211	0.714953	1.31366	0.548568	0	0.0828209	0	0.369121	0.080322	0
GLUD1	5.36391	4.78243	5.51133	5.23719	5.04695	5.55988	5.68171	4.56036	5.15505	5.07149	5.03807	4.50917	5.42983	5.06987	4.67213	5.45948	4.90032	4.79528	4.98666	5.63613	5.27858	5.55245	4.82948	5.49296	5.82463	5.4684	5.23744	5.61968	6.19482	5.43863	5.73665	5.52932	4.90813	4.8412	4.5524	5.36144	5.44245	5.27434	5.49728	5.45547	4.23607	4.12294	5.74041	5.0973	4.76151	5.36942	5.3822	5.24821	5.45602
MYH9	6.93526	7.53175	7.99671	6.8479	7.08201	7.01756	6.82676	5.9902	6.52481	6.1605	6.23127	6.71621	7.53845	6.842	6.54389	7.43378	7.23259	6.89569	6.73803	7.0916	6.4142	7.94856	6.82517	7.76514	7.59216	6.62035	7.40121	7.00329	7.07914	6.84155	6.36957	7.54667	7.80908	6.71988	6.89626	6.62771	6.24253	7.83769	7.69313	6.19748	6.01152	6.45023	7.73104	6.86991	6.47826	7.09064	6.99195	7.41023	6.94307
NOTCH3	2.71605	0.800273	0.384137	3.55395	2.80307	0.280055	0.241868	0.208587	0.971239	2.18482	0.24134	0.980951	0.866051	0.25145	0.0947125	1.08083	3.51599	2.34283	1.03147	1.27915	0.825198	0.123004	0.885236	1.45254	0.0135143	0.907283	0.843453	0.0325234	0.484293	0.413369	0.128658	2.25038	2.49898	1.50281	1.93385	0.0639524	0.0879098	1.1386	0.359018	0.291087	1.11055	2.8158	1.25952	0.113884	0.570605	1.79835	1.01191	0.499546	0.50136
PTPN1	4.33325	4.45915	4.5917	4.43128	4.87175	4.80155	4.45425	4.36402	4.49431	4.06662	4.05976	3.85191	4.62304	4.43847	3.96764	4.25265	4.43135	5.08197	4.40242	4.47738	4.08849	4.66189	4.98808	4.64559	4.44136	5.40575	4.39354	4.12417	4.44768	4.09618	4.28883	4.50805	4.10478	3.89313	4.01793	3.81795	3.94152	5.11776	4.58955	4.37222	3.49661	3.91231	4.45195	4.37592	4.06947	4.79012	4.18365	4.72582	4.61359
TPM1	0.953779	1.87789	1.12617	0.579805	0.755549	1.59316	0.756977	0.449885	1.35607	2.64213	0.91843	0.740373	1.52494	0.961225	0.440608	0.438785	1.84229	2.33613	3.12914	1.91008	0.425711	1.14758	1.64791	0.662957	1.34913	0.545382	0.787501	0.344176	1.45058	0.347578	0.23041	1.00157	0.974302	0.871384	0.68692	0.224028	0.201584	1.59316	1.54681	0.367804	0.873371	1.38501	0.899702	0.442572	4.1784	1.07962	1.80485	2.35343	1.35753
FASN	4.1446	3.7674	4.43352	4.14038	4.8506	5.18075	4.62788	5.01669	3.35446	3.53267	4.65408	5.08386	4.14438	3.57311	2.1926	4.16151	4.82599	5.35151	4.68228	5.75231	4.30658	5.37182	3.8479	5.04021	4.70535	5.80828	3.96089	5.8825	5.80734	5.18207	4.47947	4.98367	4.45882	3.73819	5.4644	5.57886	4.59358	3.46062	5.0268	2.94513	3.55131	4.14482	3.88422	5.21868	4.89997	5.02708	4.90687	4.88841	4.24789
RPS6KB1	3.09647	3.09377	2.71353	3.17136	2.63444	2.9661	2.87299	2.32947	4.09207	3.84948	3.13812	3.00791	2.90366	3.11041	3.31917	2.99585	2.90476	3.29421	3.07778	2.82771	3.19995	2.7819	3.02724	2.72452	2.77375	3.10495	3.36243	2.79384	3.02915	3.07427	3.29938	3.00532	2.82975	1.99861	3.02135	3.09908	3.34677	2.78025	3.11648	3.36245	3.09754	3.04859	3.18399	2.58949	2.64749	3.08421	3.32145	3.10035	2.76341
SIRT1	2.90303	3.25318	3.47388	3.66524	3.27033	3.32077	3.04594	2.79241	4.03549	4.05541	3.14742	3.25304	3.13203	3.44231	3.39117	3.89982	3.10162	3.59051	3.46053	2.71581	3.58979	3.20407	3.35903	3.22449	3.2265	3.54032	3.76266	2.90714	3.58605	3.18471	3.66979	3.47247	3.11202	2.79674	3.45562	3.22241	3.62058	3.22715	3.34608	3.61389	3.49807	3.24683	3.79406	3.24124	2.68964	2.84341	3.59724	3.43924	3.04624
PPP2R1A	4.22023	4.04983	4.55542	4.61824	4.78672	4.81405	4.54733	5.33101	4.43782	4.03415	4.11292	4.52558	4.62938	4.16637	4.04323	4.60592	4.62497	4.78919	4.57862	4.75535	4.02301	4.93282	4.51096	4.85338	4.79121	5.00263	4.40991	4.75563	5.12859	4.50348	4.12431	4.61359	4.42608	5.07751	4.59865	4.55084	4.28119	4.32524	5.06651	4.062	3.6875	4.10092	4.27031	4.69273	5.29388	4.33877	4.40586	4.42078	4.45997
CD151	3.66478	3.82718	4.15798	3.14361	2.73683	4.44154	3.87724	3.87131	2.02395	2.29557	3.92096	4.153	4.24519	3.35889	0.731091	3.40027	4.15904	3.8832	3.26844	4.313	1.78858	4.97865	2.90581	4.22244	4.07213	3.61144	2.29639	3.77646	4.42349	3.32267	3.24854	3.95591	5.58775	5.88431	4.42842	3.72105	1.46096	4.39158	1.92418	2.05076	3.73047	4.21025	3.79822	3.8428	3.79788	3.23737	2.84435	3.43571	4.10466
CTNND1	3.82892	3.25402	3.59607	2.58041	2.13809	4.45833	4.0108	3.2596	4.2114	4.72271	3.09297	3.97755	3.39126	4.00277	4.74539	3.80571	3.59184	4.39034	3.94954	4.14374	4.00946	3.0733	3.35906	4.23331	3.01372	4.026	3.55851	2.79651	0.981245	3.23713	3.52586	3.91588	4.5696	3.36188	4.30646	1.64836	2.01186	3.56469	4.42539	1.87979	3.97197	4.14661	3.79384	3.10888	5.15676	3.68531	4.39817	4.07682	3.81636
MMP11	0.916698	0.424207	0.0777478	0.862977	0.325275	0.271874	0.256215	0.342376	0.234332	0.99226	0.199305	0.0867982	0.131865	0.0664303	0.130573	0.138204	0.990594	0.299613	0.481645	0.298133	0.134746	0.0727079	0.870881	0.323035	0.374143	1.33652	0.103758	0.353698	0.181508	0.509929	0.022717	0.311829	0.0839147	0.144914	0.182813	0.532632	0.212445	0.0641051	0.20267	0.069264	0.124982	0.569208	0.165143	0.312948	0.129324	0.136201	0.125305	0.211341	0.525513
COL4A2	0.1649	0.231676	0.0364731	0.0629395	0.543903	0.0220644	0.0113208	0.113397	0.0173496	0.287548	0.0853927	0.275178	0.248265	0.0913551	0.101939	0.304626	0.399243	2.23975	0.179567	0.0100619	0.141403	0.0436675	0.159115	0.218794	0.0145769	0.319295	0.533094	0.0151313	0.050841	0.178256	0.0225116	0.628359	0.25264	0.020001	0.579752	0.0397661	0	0.8126	0.0632759	0.10669	0.962182	1.92065	0.468279	0.0625561	0.0133445	0.0477282	0.880232	0.292911	0.10792
ARHGEF7	3.21063	3.19603	3.0319	2.96168	3.7871	3.44185	2.80073	1.91093	3.30434	3.95921	2.88179	3.38627	3.04386	3.06789	4.4746	2.98527	3.55339	3.174	2.73907	3.84954	3.18248	3.24921	3.46319	3.53161	2.80275	3.65447	2.82791	2.62074	3.2816	2.47141	2.8968	3.49385	3.62952	2.7604	3.49004	2.65016	2.61613	2.92666	3.30395	2.91007	3.32234	3.42939	3.26197	2.90283	2.87773	3.44759	3.13517	2.98694	3.52978
PPP2R5A	4.5516	4.60969	4.8902	4.75441	4.40064	4.59486	4.58419	4.51873	4.98783	5.16641	4.02042	4.01388	4.71169	4.67165	4.63624	4.74919	5.15166	4.65335	4.45063	4.56826	4.46028	4.51352	4.42595	4.40048	4.59778	4.22854	5.27665	4.46871	4.72538	4.255	5.10926	4.80222	4.2785	4.97635	4.08016	4.29263	4.63713	4.85326	4.82212	4.89162	4.12051	4.06963	5.17562	4.53777	5.31818	4.36181	4.69745	4.92647	4.37296
BST2	6.27301	5.27696	6.41334	4.37879	5.63229	4.60201	7.10645	6.93128	4.9569	3.87755	3.63368	5.34688	5.89062	5.10068	3.16587	5.40239	5.81477	4.95841	5.92489	5.60584	5.75348	5.98306	6.35037	5.85783	6.8522	5.89811	5.53561	4.39524	6.26385	4.29192	5.76604	5.20678	5.45287	7.24223	6.02168	4.43126	3.71998	5.75067	5.75174	4.78299	5.25062	5.46783	5.1896	2.84053	6.34303	5.97177	3.12594	6.34053	6.49842
PPP2R2D	2.82193	2.53282	2.76668	3.05593	2.5808	3.09289	2.51802	2.73279	3.11123	3.08841	3.09815	2.84285	2.57214	3.18883	3.2035	2.47683	3.27378	3.02831	2.82864	2.98571	2.48503	2.64129	2.86943	2.66516	2.70844	3.02254	2.71576	2.60993	3.56171	2.56978	2.44022	2.80187	3.53934	3.23073	3.38442	2.64399	2.54282	2.74894	2.85108	2.93554	3.21314	3.22951	2.54267	3.32957	2.45739	2.65643	3.1336	2.69013	2.83006
CCN1	0.300087	0.242495	0.142435	0.276014	0.195877	0.191685	0.152828	0.204921	0.378874	0.365321	0.577769	0.143514	0.403664	0.412694	0.640821	0.172713	0.21891	0.961742	0.364283	0.443479	0.289579	0.113345	0.247004	0.223752	0.378628	0.290827	0.210659	0.445124	0.359142	0.347163	0.236903	0.334059	0.230966	0.136208	0.505633	0.650641	0.720781	0.394796	0.289948	0.271883	0.308584	0.998976	0.203004	0.160742	0.768091	0.219105	0.639678	0.652701	0.18615
CCDC178	0.00868818	0	0	0	0	0.0086253	0	0.0120293	0	0.0215596	0.00947683	0	0	0.0130463	0	0	0	0.0201303	0.0306729	0	0	0	0	0.010178	0	0.0117366	0	0	0.0111428	0.0102172	0	0	0	0	0.0118163	0.0194779	0	0	0.0125295	0.0102222	0	0.0332456	0	0	0	0	0	0	0
MIR30C1	1.14721	0.395675	0	1.49441	0.416057	1.49009	0.59812	2.12697	0.479737	1.53236	0	1.05791	0.875726	2.06945	2.43491	2.04204	0.538021	1.04247	1.66034	0.752425	2.30501	1.32368	1.30553	1.04819	0.412648	0.86507	1.81956	0.75495	1.56035	1.4786	0.943362	1.01917	2.01709	0	0	1.60897	1.4489	0.462045	1.4617	2.74857	1.40308	1.46373	1.38017	0	1.14536	1.15954	1.46416	1.30335	1.25184
MIR30B	0	0	0	0.451678	0	0	0	0.511756	1.37623	0	0	0	0	0.547888	0.63893	0	0.543116	0	0	0	0	0	0	0	0	0.50119	0	0.430492	0	0	0	0.428826	0	0	0	0	0.36917	0	0	0	0	0	0	0	0	0	0	0	0.432199
NA.2	NA	NA	NA	NA	NA	NA	NA	NA	NA	NA	NA	NA	NA	NA	NA	NA	NA	NA	NA	NA	NA	NA	NA	NA	NA	NA	NA	NA	NA	NA	NA	NA	NA	NA	NA	NA	NA	NA	NA	NA	NA	NA	NA	NA	NA	NA	NA	NA	NA
SHC1	3.95119	3.8482	4.54647	3.64862	4.18571	4.17599	3.78602	5.83411	3.63054	3.2151	3.64614	3.95038	4.26929	4.63764	3.22942	3.92501	4.41956	4.78673	4.31779	4.13125	3.352	4.5287	4.35457	4.1357	4.51786	4.21618	4.24346	5.2232	4.33531	5.01441	3.78944	4.23248	4.52121	4.10256	4.31848	4.89566	3.63234	4.62827	4.22504	3.7017	3.50539	3.92136	4.13152	4.35152	4.63442	3.69534	4.49289	4.08688	4.01655
BUB1	2.42951	3.15776	0.990729	2.90386	3.22802	2.56674	2.36566	2.35918	4.05253	3.43912	3.63703	3.16783	2.90618	2.37436	3.04593	3.34505	3.08334	4.32854	3.77725	2.47659	3.60866	2.28059	2.73129	2.90331	2.5715	3.35292	4.73335	3.03702	3.01554	3.00796	3.21344	3.07522	2.45857	0.828411	2.86358	3.19979	3.39637	2.2184	2.96129	3.18044	2.02061	2.80045	4.1304	1.92532	4.27443	2.43446	3.08758	2.53413	1.71272
CDC25C	1.12424	1.18394	0.471633	1.1987	1.09921	0.883977	0.874073	1.35711	1.798	1.35554	2.51931	1.76627	1.52906	1.1292	0.799267	2.12011	2.1045	1.52501	1.63898	1.26291	2.15924	1.05354	1.57928	1.63727	1.57195	1.63756	3.53845	1.43674	1.82812	1.39987	1.30149	1.32741	1.34413	0.421204	1.21197	1.55894	1.91165	1.18843	1.04494	1.71679	0.868898	1.56979	2.76877	1.41243	2.52423	0.971634	1.54929	0.934469	0.627363
BUB3	3.72633	3.84183	3.17716	3.83353	3.754	3.68976	3.90616	3.01247	3.87869	4.16784	4.0881	3.73641	3.64437	3.63192	3.8537	3.62519	3.49501	4.23173	3.80607	3.87724	3.86282	3.53667	3.76065	3.59514	4.44034	3.47172	4.44561	3.72871	4.2625	3.68091	3.81601	3.57284	3.44281	3.02671	3.45928	3.88856	4.07056	3.26084	3.5355	3.90033	3.65097	3.79131	3.80609	2.58559	3.96389	3.87364	4.21709	3.59713	3.48098
FER	1.56157	0.908232	1.70568	1.91851	2.37186	2.15872	1.67876	0.959042	2.65764	0.295907	1.69502	1.7795	1.57156	2.13784	2.6416	2.10942	1.46676	1.54093	2.00578	2.19127	1.98777	1.75297	1.99633	1.61442	1.58817	1.93531	0.176247	2.05734	2.97563	1.45687	2.04672	1.88861	2.0905	1.08888	1.73094	1.88961	2.13083	1.18014	0.692824	2.25614	1.64365	1.70509	1.97146	1.01702	3.17098	2.18303	0.439871	2.01687	1.53095
SETD2	4.27356	4.47686	4.14299	4.59388	4.49594	4.72167	4.19347	3.94083	5.17207	5.01485	4.04553	4.29984	4.24684	4.67028	5.13079	4.65056	4.4588	4.67054	5.10033	4.35202	4.78494	4.08763	4.39183	4.54928	4.33283	4.87574	4.5294	4.56921	4.77971	4.42949	4.49821	4.63768	4.31194	3.22387	4.50753	4.66469	4.44645	4.34638	4.21164	4.46191	4.04191	4.23023	4.63409	4.04641	4.17403	4.48933	4.41263	4.57476	4.15429
CDK1	2.49607	3.23841	1.44648	2.16654	3.1305	2.34156	2.10545	2.22921	3.68292	3.40225	4.22946	3.12095	3.41067	2.38096	1.93786	3.16636	3.33734	4.74205	3.5043	2.46423	3.65552	2.80162	2.83749	2.92615	3.2252	2.81453	5.21714	2.71313	4.21449	2.89535	3.30471	2.85553	2.31682	0.487415	2.03852	3.17115	3.31184	3.05142	2.52017	3.48638	1.97333	2.90467	4.16054	1.61401	2.84694	2.33911	3.41651	2.36818	1.82107
ITGB5	1.38174	1.43936	0.856021	0.328746	0.227423	0.405622	0.239826	0.267134	1.27258	1.55514	0.902397	0.0972058	0.539393	0.449656	0.0748302	0.81452	0.578139	1.50759	1.11662	0.682458	0.347181	0.396627	1.09267	1.57314	0.492451	0.7043	0.405212	0.143276	1.67618	0.241877	0.151119	0.477315	0.618167	0.514883	0.310058	0.136279	0.09983	0.677434	0.797974	0.253979	0.251829	1.80735	1.43742	1.0494	0.742824	0.669466	0.529239	3.11698	0.890189
TP73	0.183826	0.484044	1.08128	0.22923	1.94507	0.0834072	0.542359	0.158784	0.176049	1.39171	1.47241	0.574179	0.698333	0.303835	0.984583	0.238216	0.629673	0.257308	0.215548	0.216823	0.428479	2.52533	0.183423	0.599612	2.63801	0.169044	1.71284	0.0638367	0.806562	0.213992	0.0403202	0.106438	1.62016	0.193794	0.944935	0.12425	0.0217322	0.78684	0.339704	0.0983871	0.287783	0.586227	0.446611	0.604587	0.868217	0.148282	0.0732502	0.345356	0.300758
MAD2L1	2.38875	2.4861	1.30339	2.71015	2.34441	2.00905	2.38732	2.08841	2.71066	2.91358	3.32925	2.41045	2.2723	1.74937	2.33924	2.60591	2.31064	3.46638	2.302	2.54575	2.6167	2.11563	1.97807	2.1805	2.45445	2.99109	3.66936	2.37553	2.44434	2.69181	3.14425	2.73314	1.34696	1.04069	2.14791	2.47945	2.94004	1.83428	2.20774	3.27587	1.97211	2.27456	2.89305	2.63267	1.76841	2.40906	2.39013	2.00219	1.43037
BCL2L2	3.37695	2.58047	2.89356	3.45757	3.23728	3.27596	3.21906	3.13158	2.77791	2.32798	3.05082	3.09157	2.86034	3.31431	3.09585	2.47588	3.24916	1.93431	2.96393	3.66366	3.17922	2.54941	2.77717	3.38911	3.28253	2.87311	2.65488	3.29622	3.2107	2.89793	3.33055	3.06954	3.33395	2.95474	2.90714	3.25481	3.25207	2.86073	3.04268	3.08702	3.08605	3.19665	2.97437	2.65963	3.63986	3.44862	3.14234	3.28982	3.00794
SLCO1B3	0	0.28926	0.0129122	0	0	0.463416	0	0	0	0.0136567	0	0	0	0	0	0	0	0	0.012997	0	0	0	0	0	0	0	0	0	0.0140637	0	0	0	0	0	0	0	0.0104146	0.0136199	0	0	0	0.0210904	0	0	0.0109424	0.0295147	0	0.0132432	0
DLG1	3.47487	3.23135	2.7484	3.64537	3.26342	3.21509	2.80341	2.37271	3.95795	4.2742	3.04611	3.27369	3.08823	3.5527	3.62458	3.21476	3.47906	3.59931	3.60435	3.58461	3.16433	2.77587	3.32899	2.92451	2.95882	3.43944	3.53478	3.18485	3.85317	3.28944	3.57738	3.15328	3.27485	2.36647	3.34858	3.45247	3.66312	3.12945	2.81101	3.38859	3.12299	3.21977	3.12628	3.26052	2.85132	2.90593	3.73363	3.30287	2.71925
PDCD6IP	4.95728	4.46653	4.85585	5.05766	4.91274	4.94126	4.99984	3.87831	5.01877	4.84626	4.50233	4.44484	5.04185	4.78589	5.02779	4.56564	4.92609	4.71123	4.79025	5.11469	4.81324	4.54554	4.44198	4.72383	5.1397	4.60744	4.77697	4.94318	4.98661	4.78439	5.18787	4.88291	4.41369	4.15237	4.08737	5.14298	5.19765	4.92035	3.95686	4.73579	4.50597	4.42389	4.899	4.14316	4.55407	4.87012	4.96229	4.83467	4.79573
SCRIB	3.30249	3.28797	3.76166	3.99954	3.84465	4.05511	3.90729	3.54152	2.43751	2.84518	4.14287	4.56454	3.67183	3.42174	2.42519	3.27559	4.15274	3.59077	3.91954	3.89528	3.90752	4.28247	3.60392	4.06732	4.05901	3.9386	3.1025	4.09876	4.29922	3.74519	3.1427	3.86515	3.86588	3.85547	4.77148	4.15604	3.60415	3.30957	4.01669	2.24836	3.59197	3.67446	3.34233	4.37024	4.32925	3.74824	4.03429	3.77803	4.06788
TDGF1	0.00775826	0	0	0.0276644	0.0504782	0	0	0.0214069	0.24987	0.0570288	0.00846274	0.0274486	0.00711092	0	0.0417231	0.00994934	0	0.00901968	0.00919536	0	0.0332669	0	0.0372122	0	0.00845644	0	0.00922691	0.00877877	0.0198339	0	0.00785898	0.0174266	0.0221325	0	0.0105528	0.0260221	0.00736634	0	0.0333131	0.00912865	0.00840052	0.0149336	0.0163304	0	0.0154389	0	0.0112199	0	0.00881893
EDAR	0.0433951	0.91713	0.388872	0.140559	0.173401	0.241092	0.201375	0.183265	0.335455	0.496736	0.363482	0.571312	0.101318	0.42205	0.208008	0.322869	0.418221	0.423265	0.584679	0.245922	0.716243	0.135177	0.955777	0.210987	0.1109	0.15785	0.240834	0.288319	0.267623	0.567014	0.168301	0.25423	0.336449	0.286502	0.386987	0.342544	0.300905	0.61481	0.41698	0.175568	0.323477	0.700084	0.0636784	0.0913616	0.430067	0.300497	0.655154	0.880731	0.337882
SH3GLB1	4.48425	4.30022	4.4104	5.05418	3.42912	4.5946	4.43422	3.81218	4.97738	5.0241	3.928	4.26976	4.20453	4.26272	4.82445	4.24665	4.30193	4.45457	4.1604	4.84956	4.41677	4.34373	4.14948	4.13019	4.31098	4.41947	4.40074	4.27434	4.94772	4.30121	4.48987	4.47418	4.39904	3.96495	4.34928	4.4194	4.75335	4.42311	4.61483	4.58922	4.35562	4.26191	4.50485	3.83603	4.60468	4.55046	4.51789	4.31072	4.12495
DYNLL2	3.40933	3.28103	2.87957	3.56956	3.26689	3.10678	3.1938	4.09545	3.87452	4.38482	3.1097	3.15233	2.91265	3.47888	3.25806	3.00172	3.14281	3.33319	3.66519	3.43416	2.85555	3.17161	3.73123	3.5093	3.47968	3.49653	3.58422	3.26053	3.58656	3.13143	3.18268	3.11116	3.35236	3.09221	3.36411	3.25614	3.38857	2.95493	3.08793	3.35084	3.52478	3.68971	3.52504	3.66597	2.65134	3.30148	3.26019	3.45794	3.11598
TSC2	3.72847	3.70861	4.13999	3.76266	4.22054	4.03451	3.7344	4.29759	4.14033	3.27708	3.58148	4.07819	3.95126	3.70495	3.26528	3.54376	4.17315	3.88629	3.96441	4.35018	3.71372	4.05635	3.8945	4.29196	3.71118	3.89886	3.42426	4.27064	3.66673	4.20383	3.45284	4.00678	4.00939	3.86526	4.08863	4.5159	3.80859	3.61866	4.4686	2.91254	3.61077	3.89742	3.7328	3.92986	3.87376	3.87507	4.28418	4.01525	4.25807
BAG4	2.87584	2.87623	3.07431	3.71324	3.32746	3.09777	2.91483	3.54526	3.42384	3.41132	2.43874	3.10019	3.29694	2.85736	3.22029	3.46015	3.96702	3.30327	2.97794	2.7128	3.71254	3.31268	2.17211	3.03344	3.51709	2.91543	4.15171	3.18678	4.00325	3.07842	3.56854	3.26612	3.25536	2.18212	2.8736	3.45094	3.48372	3.44804	3.21147	3.21582	2.57858	2.61851	3.67688	2.66105	3.45996	3.0909	3.11546	3.26184	2.73479
MAP3K7	3.36484	3.68877	3.09778	3.59179	3.85289	3.57038	3.47626	2.19615	3.88581	3.83644	3.34504	3.07252	3.45462	3.4169	4.0333	3.18477	3.50003	3.89293	3.41053	3.45546	3.23892	3.17451	3.1527	3.27828	3.33768	3.20937	3.43949	3.43987	3.49802	3.18407	3.4251	3.31012	3.13859	2.68525	3.04467	3.49366	3.50379	3.13533	3.70477	3.32759	3.26847	3.14491	3.32104	2.51881	4.031	3.39605	3.51754	3.43337	3.24952
F10	0.111448	0.0835231	0.0193687	0.0582397	0.1222	0.0484726	0.0816414	0.110388	0.162491	0.0996245	0.0356744	0.300531	0.0594297	0.119385	0	0.0418724	0.0720671	0.0750224	0.347214	0.0727567	0.114664	0	0.187756	0.0192713	0	0.581575	0	0.0369937	0.0210917	0.0758718	0.0331514	0.0548988	0.0466919	0.0367399	0.209402	0.27088	0.163257	0.0405702	0.613693	0	0.594025	0.655918	0.0173673	0.0292324	0.425874	0.0657239	0.705991	0.0394583	0.0371613
HSP90B1	6.63695	6.67933	6.30301	5.89228	7.21361	6.78373	6.97037	5.36634	6.66956	6.05343	8.13035	8.3425	6.87189	6.87309	6.25171	7.07901	6.4029	7.37937	6.58699	6.38495	6.54587	6.65546	6.60939	6.72674	7.32657	6.84808	7.10715	7.43912	6.47262	7.23633	6.97249	7.24207	7.87035	5.68729	8.01578	7.15494	6.81151	6.73722	6.34827	6.41382	7.74099	8.57456	7.18467	6.93602	6.19793	6.71634	7.36297	6.73652	6.68936
F3	0.555912	0.434742	0.472653	0.0942578	0.434917	0.894294	1.31901	0.0186807	1.08645	0.918799	3.36803	2.58532	1.03639	2.29767	0	0.670164	0.533798	0.285353	0.0934174	0.25186	1.24449	0.922717	0.518858	0.234278	2.68084	0.966113	2.06255	0.0303853	0.57996	0.0471021	0.855646	0.186162	4.64875	0.833552	1.85256	0.030205	0.0752653	0.470546	0.712039	0	3.71451	3.05195	0.375999	0.917638	0.42981	0.688076	0.935154	0.816558	0.266797
ADAMTSL1	0.011794	0	0.0104254	0.0280721	0	0.00293611	0.0025018	0.0122594	0.0228902	0.047187	0.00965824	0.0483957	0.0188668	0.00887744	0.0318671	0.00379461	0.0218629	0.208072	0.00350648	0	0	0.00365825	0.00358216	0.0034659	0	0.00798509	0.0586784	0.00334732	0.00758057	0	0.00598583	0.00333237	0	0	0.0120423	0.00995888	0.00840741	0.0399201	0.00852531	0.0104179	0.00320284	0.146548	0.00312179	0.00527233	0.0117665	0.00400362	0.0380737	0.00357311	0
SERPINB1	8.06479	6.61642	6.94663	6.93073	7.97069	6.44614	8.18302	6.51053	7.53555	7.22929	7.4319	7.34779	7.07929	6.68183	7.32031	7.54569	8.05595	7.29086	7.02698	8.38041	6.88986	7.97296	6.58449	7.39576	7.16743	6.96172	8.06458	7.8771	7.58859	7.62084	8.03352	8.35482	7.69125	8.03368	7.33526	7.42956	8.6542	7.13065	7.1645	8.5935	7.68577	7.42622	7.46937	7.76155	7.06098	7.85449	7.56582	7.82912	6.97313
MIR181A1	0	0	0	0.912506	0	0	0.27242	2.24699	0	0	0.342682	1.85842	0.292992	0.453707	3.93203	1.36561	1.06838	0.893312	0	0.635913	0.772906	0	0	0.656303	0	0.735184	0	1.25748	0	0.658341	0	0	2.17716	0	0.739105	1.07447	1.51919	0.384521	0.438136	2.93609	0	1.27652	0.332728	0	0	0	2.07116	0	0
MAP3K1	3.85287	4.00029	5.04314	4.103	4.19837	4.85795	4.43242	3.90595	4.79989	4.57945	5.24397	5.38166	5.00292	5.67115	3.95251	4.95469	4.15824	3.79575	3.81488	4.09971	5.35219	4.64976	4.32438	4.98102	4.16133	3.80924	4.42322	5.17019	4.57062	4.82983	4.34379	4.86018	6.04995	3.42681	4.74617	5.07415	5.29754	4.86218	3.88411	4.34984	5.37917	5.45655	4.83801	3.83542	4.10778	4.31572	5.35454	4.23854	4.35977
CTBP1	4.14394	3.9524	4.32994	4.08744	4.38331	4.27439	4.61447	4.48823	3.48379	4.39929	4.22771	4.179	4.22368	3.9973	3.97178	3.71866	4.51153	4.21473	4.11309	4.42797	4.06513	4.5587	4.56779	4.44521	4.35075	4.4017	4.3686	4.71949	3.9934	3.97289	3.98124	4.07509	4.59141	4.80704	4.10678	4.20179	3.64955	3.95588	4.33641	4.03111	4.16451	4.15685	3.76295	4.16652	3.23792	4.17865	4.50114	4.00646	4.65751
CEACAM4	3.38033	1.41564	3.68215	3.26449	5.23012	1.07156	3.62413	4.29661	2.48735	0.898737	2.83605	2.05422	5.24275	3.48831	1.30674	3.33338	6.13978	4.20542	3.53585	4.91505	1.76573	3.95557	2.3107	4.02123	2.22434	4.34496	4.62221	4.73793	2.79751	4.77093	1.54953	5.3005	3.34708	4.68017	2.17236	4.93807	4.3569	4.96223	3.23033	3.42332	1.65363	2.19994	4.32904	1.93676	2.00896	2.2419	4.43693	2.718	4.77904
PXN	4.0049	4.47944	4.93925	3.07853	4.06579	3.83398	3.65301	5.27398	3.46077	3.24232	3.1455	2.75918	4.27543	4.3532	1.93301	4.35221	5.26103	4.21916	4.24791	4.73269	3.13404	5.34903	4.51282	4.79067	4.01709	3.93847	3.88084	4.29037	4.11853	3.7057	3.79861	4.54251	4.23817	4.71547	3.55795	4.07714	3.62344	4.91415	4.92259	3.14241	2.78697	3.03293	4.17994	3.71603	3.47081	3.98489	3.54154	4.54998	5.12189
MALAT1	10.0728	10.2915	9.56234	10.6528	8.9925	8.77165	9.72891	9.49667	10.6346	10.6711	10.8179	9.95778	8.58937	11.1203	11.4865	10.5511	10.1811	9.7641	9.79449	9.23774	10.6519	9.73358	10.4428	9.46125	8.23776	10.3645	10.327	9.97064	10.5878	9.79644	10.4293	9.47444	10.2539	9.76905	9.77658	9.42077	10.4233	10.0116	9.74922	10.2902	10.0167	10.2845	10.0285	11.1579	8.41853	9.77922	10.1459	9.73827	10.1913
IKBKG	1.32266	1.53706	1.97548	1.21987	1.68957	1.64925	1.30483	1.63825	0.836701	0.818596	1.23503	1.11382	1.87743	1.61986	1.22269	1.21852	1.6883	1.58712	1.51244	1.28278	1.1473	1.9704	1.45654	1.59024	1.70993	1.5594	1.46416	1.48717	1.31303	1.45859	1.11363	1.40523	1.87506	1.45828	1.19733	1.58468	0.899428	1.8284	1.48123	0.954381	1.15558	1.14534	1.36096	1.50834	1.65411	1.56579	1.46644	1.55309	2.01116
TFDP1	4.89483	5.25913	4.24037	4.98876	5.04653	4.63228	4.83844	5.06916	5.32682	3.68176	5.0454	4.70526	5.60973	4.27936	3.55587	4.99456	5.35794	5.99346	5.41041	5.42316	4.84167	5.04845	4.56292	5.43439	5.521	4.72752	5.62784	5.03559	5.3422	4.60659	5.05051	5.07325	4.42197	3.66349	4.46545	4.9692	5.25936	4.96855	4.92665	4.86184	4.31967	4.63147	5.29407	4.67494	4.32206	5.0872	4.78466	4.64549	4.68176
CRYBA1	0.689554	0.359487	0.486509	0.891919	0.711034	0.65493	0.574808	1.32774	1.2982	0.633729	0.531796	0.854778	0.831797	1.22104	1.0783	1.56857	0.591322	0.903897	0.821323	0.427959	1.24767	0.706454	4.21484	0.56445	0.672524	0.796261	1.17362	0.470253	0.478495	1.00101	0.427464	0.507913	1.15059	0.20548	0.911246	0.61942	0.506046	0.745896	0.712898	0.880956	0.331236	1.12596	0.840437	0.62913	0.657534	0.299252	1.09338	0.318261	0.695453
ANKRD13C	2.75557	3.15228	2.47147	3.26885	1.97799	2.63441	2.26636	2.59829	3.51086	3.87871	2.77279	2.43126	2.96002	3.00915	2.80671	2.94705	2.71924	3.17295	2.99183	2.94668	2.77856	2.41031	2.76574	2.66686	2.70391	2.31773	2.87062	2.74986	3.27668	2.47722	3.14442	2.62075	2.66786	2.13928	2.47438	2.76513	3.13872	2.6903	3.45253	2.9927	2.54331	2.68392	3.11067	2.15134	3.99582	2.59706	2.95185	2.92131	2.64566
SERPINE1	2.81417	1.10065	0.695014	1.71896	1.35997	2.27879	1.3735	2.47745	1.73695	4.36977	3.25298	3.77163	0.835312	1.34593	0.577103	2.30673	1.75305	1.03882	0.959418	3.72514	1.09517	0.819916	1.89542	5.15831	2.59994	2.54205	0.370052	0.620235	3.13728	0.712013	0.185666	1.88841	4.30326	3.35602	2.63568	0.352178	1.30575	0.659245	2.2793	0.772499	3.64584	2.95171	2.63152	2.05644	4.44711	0.589656	3.2483	1.40519	3.13196
FOXO3	3.61288	3.62503	3.11965	4.08156	3.6591	3.06849	2.65402	3.00921	3.71253	4.28637	2.78211	3.39159	3.34379	2.86103	2.8115	3.34693	3.84277	4.39268	4.05033	3.61279	3.2497	2.89041	3.40627	3.30087	2.77879	3.42089	3.52276	3.27066	3.4575	3.38594	3.5787	3.40846	3.51902	2.42443	3.34095	3.3373	3.78304	4.55384	3.52741	3.31609	3.42755	3.20818	3.24283	2.59765	4.36856	3.07373	3.67129	3.71326	2.99472
ACTG1	9.90856	9.19104	9.69908	8.64523	10.017	10.1243	9.85393	10.0775	9.65941	9.61486	9.50528	9.82357	10.0562	8.7501	9.0342	10.0018	9.26426	9.1139	8.98356	10.1808	8.85498	10.0378	9.51696	9.79262	9.77206	9.3417	9.91887	9.51109	9.12362	9.47759	8.9965	9.77201	9.56736	9.89858	10.0985	9.09281	10.0587	9.43099	9.72451	9.23376	10.0477	9.86154	9.57564	9.89037	8.25834	9.73501	4.69096	9.79875	9.11703
ARHGDIA	5.30963	5.17658	6.82919	5.29941	5.96317	6.20054	6.0803	6.19787	5.00207	4.59679	5.90236	5.90894	6.15442	5.84098	4.61136	5.66562	5.71326	5.90223	5.089	5.90083	4.68854	7.12822	6.06049	6.17698	6.43543	6.51504	5.80533	6.16561	6.15587	5.87458	5.30631	6.12863	6.78833	7.43939	6.34292	5.73121	5.06662	6.39236	5.95368	5.17908	5.37605	5.74441	5.69476	7.12562	5.12273	5.92133	5.81515	5.67089	6.24805
EZR	5.05798	5.04443	5.29063	2.70223	4.54113	4.42297	5.11589	5.24871	5.71766	5.18634	4.8953	4.65272	4.86942	4.97925	4.96791	5.12094	4.22355	5.7539	4.8284	5.59486	4.23432	5.9605	6.16144	5.72502	5.53921	6.14085	5.38432	5.11575	5.34515	5.24325	4.32256	4.82446	6.57086	5.1249	4.73413	5.28586	5.34116	4.98603	5.60447	4.62079	4.95754	5.17397	5.42818	4.77571	6.68529	4.0452	5.17712	4.91944	5.08277
SLC39A6	3.69588	3.39391	3.61184	4.23612	3.88048	4.33864	4.43761	2.40169	4.07205	5.33096	3.70385	3.42804	3.5144	3.45107	3.64909	3.25909	3.0394	3.76132	3.70484	3.8649	4.14265	3.59683	2.57164	3.33312	3.87957	3.81197	3.86368	3.50303	3.26357	3.6092	4.63905	3.37821	3.24683	3.35416	3.48867	3.58326	3.79996	3.62549	2.91069	4.48529	3.36491	3.40277	3.49316	3.79031	2.96016	3.89513	4.11231	4.01521	3.43526
BIN1	3.46892	3.9162	1.84846	3.51305	1.50034	0.779437	1.42368	4.11707	2.69769	1.51463	1.06911	2.39424	1.75278	1.23946	1.54831	1.71062	3.69268	2.82191	3.84444	4.3288	2.9823	1.3664	2.12751	3.28496	0.847674	2.27516	0.647374	1.84836	2.54405	2.28512	1.40055	2.16403	2.25375	1.79627	2.59974	2.2921	2.05755	1.51698	4.6132	0.658677	1.70129	2.4559	2.50433	0.831479	1.42712	2.78457	0.876548	2.686	3.58886
TIAM1	0.140036	1.78605	0.504331	0.142103	0.730781	0.355068	0.71144	0.212161	3.42132	2.94311	0.393334	0.39955	1.51011	2.92354	0.349981	0.629532	0.545648	1.40154	1.29952	0.0924057	0.305765	2.93177	1.3458	0.99683	0.443965	0.745612	0.270021	0.803007	0.270439	0.766757	0.129444	0.261114	0.768961	0.533964	0.565043	0.361752	0.208415	2.23061	1.54499	0.360221	0.936041	1.1975	0.599479	0.447541	3.13136	0.361135	1.32093	1.2288	1.38915
PDPK1	2.61438	2.37711	2.93451	2.43691	2.58675	2.72562	2.30634	2.54143	2.61631	2.58078	1.96909	2.28446	2.72485	2.62999	2.08102	2.48315	2.78696	2.48571	2.60017	2.56255	2.26928	2.53666	2.3682	2.69415	2.71941	2.23682	2.70283	2.54988	2.34592	2.43797	2.59573	2.74201	2.54006	1.66408	2.28898	2.59015	2.59909	3.13315	2.70003	2.51551	2.42853	2.21935	2.72283	1.95359	2.01728	2.5371	2.61748	2.63615	2.56431
SMAD7	2.08272	2.07646	1.06721	0.275367	1.54091	0.231971	0.500676	0.481092	1.1733	1.17581	0.541342	1.1316	1.6291	0.769499	1.88074	0.609934	1.72676	1.30637	1.24066	0.438109	0.385346	0.874482	1.04568	1.05148	1.08237	0.608562	1.40884	0.667578	0.41026	0.472646	0.236341	0.57218	1.74909	0.219829	1.11522	0.250315	0.322184	1.15607	1.14786	0.649694	1.73947	1.60141	0.549623	0.593994	1.39843	0.342204	0.583269	1.12212	0.937943
RHOC	2.83598	2.54395	2.19323	2.50038	1.37594	2.3572	2.21	3.87703	2.50828	2.36878	1.76309	1.79502	1.83858	1.62717	0.512016	2.44695	2.53197	2.23973	2.65713	3.30665	0.881194	2.73962	3.55227	3.13405	2.48217	2.19106	1.24698	2.34888	3.69076	2.3743	1.1307	2.04903	3.65993	4.63222	2.155	2.17103	1.75817	1.35129	3.36499	0.455533	1.50156	1.69032	2.63379	2.27595	4.50366	1.91521	1.70232	3.09448	3.12095
CASP2	4.70557	4.87636	4.54019	5.68909	4.68422	4.93821	4.73093	5.59098	4.53548	5.80642	5.03586	3.88784	5.00621	5.4332	5.71361	4.65742	5.36759	3.97741	4.95899	4.67231	4.90717	5.38278	4.29447	5.22751	4.35866	4.93388	5.26851	5.34438	4.87147	5.20482	5.35617	4.88507	5.48006	4.44596	5.34103	5.39652	5.42592	4.68788	4.40422	5.85696	4.82273	4.79102	4.87029	5.24055	3.31386	4.93689	5.83682	5.05643	4.54474
TNC	0.50097	1.65578	0.475029	1.65322	0.86738	0.296726	0.230441	0.279607	0.0363346	1.34782	0.254377	0.278792	0.958572	1.06823	0.327017	0.643045	1.9296	1.63585	1.78169	0.375396	1.12511	0.205025	1.76232	0.798902	0.162565	1.79158	1.22969	0.216535	0.3652	1.24674	0.515101	1.0308	0.419848	0.179428	0.735138	0.306516	0.303755	1.34742	0.659257	0.804305	0.764479	1.86884	1.02391	0.20181	0.0398205	0.538088	0.83832	0.850691	0.18544
IRF6	0.031393	1.45264	0.3691	5.12672	0.1492	0.354389	0.158705	0.156204	0.146851	0.077015	0.33802	7.52581	0.228168	0.168722	0	1.57693	0.452381	1.1517	0.780204	2.61644	0.0887453	0.18407	0.270873	5.7713	0.0593164	4.98576	0.135089	0.103938	0.0598486	0.0549536	0.137873	4.52826	0.140765	0.245446	0.600898	0.0177449	0.0445012	0.467585	2.52136	1.69313	4.4611	0.199843	0.104966	0.415328	4.24307	0.152783	0.682746	2.40048	0.153894
NTRK3	0.00436687	0.0120668	0.0136742	0.00174374	0.0317388	0	0	0.00806063	0.00566949	2.65002	0.00317769	0.442294	0.00400211	0.00874311	0.00791142	0.00560202	0.0193946	0.028541	0.0120506	0.00492087	0.172197	0	0.0105578	0.00341335	0	0.0446448	0.0189564	0	0.00560298	0.00513677	0.00295059	0.00982324	0.0186869	0.00163778	2.18355	0.00327683	0.00828018	0.0180068	0.00630179	0.0153633	0.152673	1.29436	0.00460923	0	0.0344903	0.00591037	0.0619746	0.0140246	0.00331169
GNE	3.30286	3.00081	3.13504	3.87985	3.57048	3.39435	3.64285	3.34001	3.5819	3.49151	3.09764	3.44211	2.88651	3.43853	3.17189	3.23926	3.1254	3.44042	3.29222	3.47701	3.2722	3.31402	3.20491	3.48221	3.34912	3.1692	3.35331	3.48554	3.27391	3.30179	3.7408	3.11313	3.36009	2.36602	3.49236	3.22864	3.79006	2.95603	3.42907	3.56148	3.22068	3.21792	3.45429	3.06519	2.62985	3.28319	3.58897	3.55271	2.95758
XAF1	3.18051	3.05648	2.66634	1.56377	0.443389	1.06993	2.66044	3.24048	2.68355	2.26889	2.05848	3.34218	2.84441	3.12611	2.84284	2.40608	2.74634	2.11016	3.30833	1.79817	2.06214	2.94555	2.32331	3.99182	2.42981	1.92661	2.22524	2.26921	1.06781	2.56407	2.79754	2.23192	3.31648	1.63186	2.67354	3.80236	1.70044	1.65461	3.7691	1.63549	4.18392	3.38384	2.66154	1.23633	1.85651	1.81919	2.29945	4.26494	4.0944
SFRP1	0.00816774	0.106597	0.00961718	0.0948454	0.0356172	0	0	0.0225311	0.0419405	0.0986334	0	0.028887	0.014934	0.0244285	0	0.0916366	0.0361127	0.684839	0.36681	0.0092024	0	0.0201268	0.22042	0.00956863	1.33144	0.157258	0.182837	0.0184251	0.0208762	0.155185	0.056944	0.123759	0.112884	0	0.158273	0	0.0154689	0.67153	0.0234645	0.239344	0.175207	0.609634	0.0257083	0	0.0243092	0.0110496	0.157159	0.00986398	0
MAP2K2	3.68055	3.86973	4.63247	3.45986	4.42247	4.38439	4.29279	4.31826	3.56429	3.4516	4.05722	3.92339	4.19861	3.84491	3.42728	3.99582	4.76826	4.44024	4.66056	4.11976	3.64748	4.69078	4.40348	4.20133	4.38596	4.08813	4.31614	4.04057	4.36143	3.79466	3.3614	4.10301	4.60137	5.41911	3.84698	4.00762	3.48593	4.24145	4.37179	3.55988	3.80092	4.0322	3.70944	4.52608	4.45558	3.9232	4.14131	4.11014	4.56185
CSK	4.63268	4.4525	6.1599	5.12961	4.64886	5.26384	5.41873	5.13404	4.46625	4.03231	4.72216	4.17695	5.55409	4.98183	4.58707	5.19773	5.17687	4.98937	4.95869	5.21512	4.22418	5.95934	5.53362	5.75748	4.97767	5.29342	4.99312	4.93354	4.89123	4.96848	4.45361	5.4282	4.87755	5.76453	4.34422	4.83046	4.17779	5.40914	5.28731	4.40973	4.14829	4.22603	5.18492	5.39979	4.91975	5.01534	5.1724	5.27141	5.51647
PIK3C2B	2.6718	3.74465	2.09227	2.46352	3.69722	3.68107	2.707	3.49731	2.83944	3.70388	2.14234	3.09855	1.48392	1.95453	2.54303	1.96624	2.21299	3.02209	2.85554	2.74881	2.67229	1.84673	3.9073	2.45313	1.93615	2.51837	1.80493	2.83846	2.80513	2.89517	1.50058	1.70848	3.20732	2.24414	3.51428	3.47111	3.07707	0.968234	4.55422	2.15853	2.6896	3.04294	2.00241	2.11258	2.42066	2.42295	3.47391	2.71182	2.53272
FOXC2	0	0.0482374	0.0366101	0.0187132	0.0172177	0.015539	0	0	0.0403132	0.0194812	0.0339386	0.0185668	0.0426268	0.0234751	0	0.0398391	0	0.235878	0	0	0.0665233	0.0193402	0.01894	0.036427	0.0670481	0	0	0	0	0.314826	0.0470507	0.0176258	0.0223851	0.0175823	0.0832571	0.0521657	0.81227	0.0194287	0.0225484	0	0.016944	0.0300524	0.0328473	0.027807	0.0156155	0.0211552	0.0448679	0	0
ARHGDIB	8.75763	8.6787	8.70823	8.29463	8.88091	7.95923	8.46074	8.64432	8.6075	7.61221	7.6511	7.97256	8.69906	8.19153	8.60165	8.90368	8.67096	7.86804	8.26976	8.53706	7.44904	8.72954	8.66034	8.55534	8.91876	8.33084	8.89229	8.45641	8.46259	8.87416	8.28011	8.57726	8.7843	8.89133	8.72119	8.53942	8.88992	9.03106	7.87228	8.92686	7.8407	8.19239	8.58985	8.65537	7.65277	8.52759	8.67403	8.25278	8.36754
ENDOG	1.63171	1.28557	2.31233	1.53836	1.41974	2.41343	2.32159	2.17527	0.443059	0.897106	2.35809	1.61069	1.81353	0.668708	1.50628	1.7263	1.76663	2.0208	1.59639	1.81618	1.44861	2.11722	2.18537	2.22541	3.1201	1.89276	1.73669	2.12689	1.68722	1.93443	1.34597	2.03309	1.97912	2.27409	1.49636	1.85637	1.57076	1.81665	0.793036	1.40935	1.45864	1.56473	1.55957	1.92526	1.13521	2.34807	1.63406	1.20782	2.3104
TAGLN	1.82916	2.94425	3.66658	1.76699	2.02449	1.47925	2.92952	1.67813	2.25778	2.04635	1.81961	2.21357	2.32093	3.09331	1.49956	2.15511	2.59512	2.78142	2.90955	1.8657	1.74351	1.81852	2.7818	2.98911	2.93422	2.17872	1.95075	1.69682	1.70434	1.95093	1.54372	2.87381	2.99355	2.64242	2.72652	2.05124	1.88464	3.40804	2.43951	1.56056	2.57413	3.08017	2.72125	1.61747	2.65562	1.71788	2.19758	2.78393	2.47692
FBLIM1	2.01152	0.315175	0.103362	0.228355	0.381621	0.0404722	0.0413635	0.523039	0.237166	0.92605	0.112764	0.0577421	0.230602	0.208089	0.156222	0.198016	0.503813	1.26302	0.243075	0.141905	0.11457	0.0403528	0.36142	0.156016	0.0267958	0.25553	0.284805	0.055095	0.0521186	0.173941	0.0574767	0.368098	0.046653	0.0547193	0.303476	0.0813955	0.141938	0.361724	0.136615	0.156661	0.403587	0.980609	0.262625	0.140463	0.141339	0.05493	0.291692	0.105929	0.0822382
RACK1	8.91543	7.17912	7.58422	8.22819	6.96932	7.84499	8.32815	8.41703	7.38552	7.08167	8.32133	8.0695	7.79412	7.43624	7.46725	8.04779	7.8875	6.76931	8.17666	8.48821	7.79751	7.98664	7.82904	7.60531	7.63913	8.16108	7.43847	7.99016	7.80151	8.3943	8.19586	8.14568	6.75363	8.99572	7.98235	8.07516	8.18457	7.21166	7.97979	8.46963	8.26571	8.22589	7.42374	9.2013	8.81281	8.28244	7.50679	8.37751	7.47556
CCDC80	0.599249	0.587632	0.425999	0.269548	0.423752	0.175476	0.104616	0.253458	0.293523	0.579997	0.239404	0.431559	0.384156	0.470555	0.327777	0.545127	0.850584	1.62993	0.520096	0.397241	0.273512	0.397539	1.05642	0.41104	0.360739	0.420489	0.63567	0.116724	0.342673	0.375015	0.160035	0.677082	0.103145	0.246062	0.329089	0.0910568	0.180786	0.941242	0.155074	0.361574	0.288923	1.36527	0.455333	0.513975	0.0866398	0.0824423	0.357792	0.295608	0.0759928
ANGPTL2	0.392618	0.548121	0.167128	0.0816546	0.214931	0.0295592	0.0663002	0.0941581	0.239469	0.343164	0.105457	0.0810292	0.341991	0.183819	0.716326	0.13504	0.759599	1.01912	1.30763	0.0662654	0.137804	0.164001	1.0667	0.145229	0.313236	0.610091	0.403321	0.0556647	0.181201	0.316544	0.0301567	0.563427	0.188391	0.0334247	0.295275	0.0981277	0.252606	0.282112	0.0706434	0.268498	0.114772	1.0517	0.287008	0.0698418	0.0198705	0.0792569	0.819549	0.160384	0.0991377
HOTAIR	0.01491	0	0	0.0528331	0.0326192	0.0294543	0	0	0.0193366	0.53918	0	0	0.0272092	0	0.0269328	0.074957	0.0439316	0.0173272	0	0	0	0.0184244	0.0180431	0.0174603	0	0	0.0352332	0	0	0.0175274	0.0300496	0.0167907	0.0213262	0	0.0599533	0	0	0.0185088	0	0	0.0635079	0.0286343	0	0	0.0148752	0	0.220897	0.0179977	0
PRKD1	0.00749868	0.169325	0.0176058	0.00897019	0.257023	0.0222189	0.0126616	0.0410951	0.0480183	0.0186192	0.00817966	0.0439597	0.303332	0.0224377	0.0403429	0	0.0762668	1.80119	1.51916	0.484804	0.284428	0.00927178	0.155278	0.0175172	0.00817357	0.0597469	0.128311	0.00848515	0	0	0.00759604	0.0168454	0.0319755	0	0.0303863	0.0251567	0.0142047	0.125228	0.0215517	0	0.0401482	0.190024	0.0468478	0	1.80336	0.0101453	0.0428991	0.0358894	0.00852397
LDHA	6.25834	6.84098	6.06961	5.68698	5.22109	6.29438	6.62569	5.73769	5.83232	5.35688	6.17524	6.14718	5.8906	5.82078	6.19106	6.29931	5.40219	5.24901	5.3467	6.19908	5.59439	6.48922	5.95186	6.2007	6.82817	6.5511	6.53644	6.11137	6.0323	6.32081	6.45208	6.36206	6.38201	6.58943	6.68515	5.82725	6.62492	6.11664	6.32845	5.78155	6.40541	6.48591	6.46958	6.49799	5.42499	6.69198	5.89771	5.8385	6.23447
ANXA2	3.71251	2.95076	5.48563	0.469846	1.68032	4.63453	4.37684	3.1631	3.57315	2.87755	2.69555	3.74142	5.64362	4.70435	1.4596	5.17862	2.22053	2.69356	2.52573	4.48114	1.21736	5.80109	4.31526	5.03802	5.14062	3.20781	4.32703	4.35421	4.66064	3.56407	3.23983	4.89756	6.51903	5.11888	4.05081	3.65631	1.41959	5.57148	3.52764	1.14041	4.44768	4.8035	5.33425	2.66934	4.71926	3.42939	1.77661	3.01194	4.79472
SPP1	0.288389	1.37024	0.552347	0.338947	0.358392	0.172714	0.814296	0.154459	0.240648	1.60029	0.297157	0.0776741	0.0304688	0.18918	2.18555	1.19245	1.0528	1.07775	0.457202	4.21332	0	0.175912	0.420734	1.1649	0.036179	0.249735	0.0587644	0.144649	0.742188	0.0390064	0.0336456	0.805748	0.976954	2.40789	2.34794	0.0187817	0.165583	0.24875	2.34195	0.510964	1.50024	1.17536	1.73802	0.195907	0.0331412	0.0448024	1.20065	0.0981027	0.354008
SMARCE1	3.35001	2.7058	2.54649	3.53006	3.21304	2.85403	3.05186	2.34561	3.96336	4.18212	3.16055	2.79989	2.62341	3.084	3.75111	2.87247	2.59022	3.23403	2.75289	3.26164	3.14986	2.62745	2.91838	2.73173	2.8497	3.23731	3.1523	2.88618	2.74843	3.28355	3.1916	2.7993	2.68833	2.68868	2.67488	2.93858	3.44003	2.39626	3.26283	3.51374	2.69231	2.65215	2.97646	3.04132	2.36308	3.13823	3.2247	2.88716	2.56611
RBFOX2	2.09475	0.735242	0.401815	0.0727095	0.127102	1.62893	0.0675591	0.0477826	2.00042	2.29447	0.536651	0.734198	0.589375	1.48665	0.0210374	0.0919646	0.764649	1.73804	2.58875	2.00756	1.12908	0.0932787	0.682536	0.118256	1.76987	0.619728	0.261997	0.130559	0.251648	0.212633	1.09962	0.204251	0.296662	0.101409	0.375941	0.113703	0.160763	0.696593	2.42061	0.122967	0.243881	0.714285	0.148315	0.649165	2.10486	0.606642	1.52994	1.00568	0.0306696
QSOX1	3.3603	3.31853	4.49589	3.10821	5.0652	4.1936	4.86033	4.60479	2.66949	3.18027	3.69356	5.04455	4.49629	4.25591	2.43077	3.86818	4.20687	3.99531	2.66434	3.41222	3.5198	5.06399	2.99469	3.82425	5.2587	2.99286	4.18582	4.25351	4.02852	4.14595	4.62887	4.24763	4.50163	3.56488	5.05971	3.38042	3.93245	5.38627	2.77924	3.51435	3.93659	4.24914	4.07279	4.45312	3.28664	3.9548	5.16055	3.95799	4.02572
RPS6KA3	4.56417	4.86471	4.88877	5.73546	4.27787	5.03706	4.64295	3.33494	5.20291	5.0961	3.95831	3.66911	4.27913	4.95621	5.62802	4.86993	4.61081	4.41062	4.37631	4.88183	4.68647	4.41172	4.50414	5.68048	4.43538	4.21148	4.65974	4.51659	4.5667	4.27652	4.47736	4.75746	5.15224	3.06197	4.11377	4.33953	4.78217	4.31682	4.68297	5.28391	5.10278	4.16416	5.47066	3.72271	4.7014	4.90307	4.60764	4.54678	4.8017
CDC42	6.06623	6.05251	6.15901	5.8726	5.9576	6.06554	6.03326	6.40741	6.1206	5.60737	5.7075	5.44111	5.80092	6.1861	6.01374	6.19751	5.38762	5.98776	5.37315	5.77816	5.41097	6.24722	5.59989	5.93657	6.25897	5.95484	6.65201	5.84996	5.77077	5.93352	6.33743	6.01525	6.06182	6.32924	6.08045	5.68548	6.22284	6.42518	5.97705	6.24095	5.64683	5.80365	6.22923	6.38389	6.40794	6.26672	5.77414	5.70073	5.85027
MAOA	0.209731	0.132943	0.111893	0.21165	0.182114	0.589614	0.0698769	0.0194259	0.122894	0.578816	0.160109	0.112749	0.764685	0.131718	0.0748038	0.162512	0.537209	0.96751	0.675577	0.429967	0.285209	0.017351	0.206664	0.331022	2.45929	0.127731	0.065637	0.129736	0.279059	0.111762	0.0833032	0.062234	1.17294	0.253839	0.14603	0.150604	0.0133325	3.2372	0.225851	0.0328412	0.344922	0.226312	0.029483	0.242693	3.46269	0.516425	0.182083	0.168749	0.194803
PIP5K1C	3.5535	3.1429	4.36116	3.56149	3.85286	3.8924	3.45716	4.14726	2.6691	3.0073	2.90999	3.27909	3.78109	3.29983	2.53911	3.63422	4.32333	3.34993	3.74592	4.55968	2.97657	3.72683	3.78169	4.20372	4.10259	2.99121	2.96948	3.58245	4.1283	3.18147	2.82597	3.97039	4.24196	4.39288	3.28172	3.559	2.94217	3.81962	4.16882	3.02753	2.71239	2.9981	3.64781	2.99655	3.50403	3.72302	3.69237	3.81877	4.24267
JUP	5.26183	4.4793	4.29199	6.53531	6.81658	3.85839	4.05059	7.47336	4.85009	5.54869	3.19124	5.03525	4.85985	1.70214	5.33974	5.45996	5.10421	4.74294	4.99045	6.72266	4.5854	4.07454	5.90224	6.25254	0.921805	5.71104	2.90973	6.81057	6.25371	6.52153	3.92714	5.71905	4.58336	6.42666	5.83874	6.68578	6.11992	3.3033	6.55246	4.97464	4.74148	4.9875	5.21074	5.91434	4.51921	3.87363	6.17275	4.82559	4.50543
ATF2	4.17523	3.96587	3.60176	4.25483	4.28227	4.17241	3.88578	3.42758	4.47146	4.76315	3.67054	4.13185	3.83751	3.82966	4.35863	3.95488	3.98574	4.21958	4.1378	4.30671	4.18334	3.63064	3.80436	3.64608	4.00361	3.71938	4.22505	4.11326	4.57359	3.87923	4.36007	3.95091	3.98088	3.00007	3.88036	4.12708	4.35153	3.61558	4.20821	4.03353	3.88256	3.97704	4.13921	2.9211	4.74893	3.98228	4.41422	4.10037	3.66001
NKX2-1	0	0	0	0.0146718	0	0	0	0	0.0159158	0.0303897	0	0	0	0.0184119	0.0221785	0.0312845	0	0	0	0.0138207	0	0.0301705	0	0	0	0	0.0145872	0	0	0	0	0	0	0.0807951	0	0.0137971	0.0346719	0	0	0	0.013283	0	0.0129479	0.0218166	0	0	0	0	0.0139434
OCLN	2.0379	0.221762	1.79996	0.246853	0.0313975	1.99303	1.50046	0.0471916	2.47628	0.207224	2.54214	0.459473	1.39523	2.08637	1.11609	0.868763	0.52635	0.421648	1.99866	1.06072	2.15304	1.05542	0.410723	0.0267916	1.63475	0.422891	0.781022	0.0449936	0.341257	0.172503	3.41898	0.260907	0.118982	1.16662	0.156152	0.0758481	0.0746939	0.552973	2.60284	0.0663503	1.07916	0.686586	0.82219	1.80591	0.0729322	2.05533	0.0968909	2.79742	0.190216
ID2	4.59947	3.91157	4.08019	1.38621	4.65101	3.05344	4.51187	1.92744	5.35692	4.59556	4.47594	2.12034	5.35605	5.1872	3.74022	2.55512	3.61542	5.22226	3.98569	3.92764	2.39029	5.30132	5.749	2.77869	5.46017	6.45015	4.85904	3.10503	4.30198	3.02244	1.92848	2.86501	4.88797	5.37452	4.05361	1.75966	2.06252	5.44581	2.60841	2.47138	3.16018	3.7789	3.05955	5.58102	5.75469	3.22754	4.20262	3.01185	4.77475
CRABP2	0.4527	0.689529	1.34157	0.584941	0.46325	0.397402	0.169539	0.308523	0.683865	0.820192	1.03255	0.463962	0.664905	1.52844	0.290271	1.13646	0.697487	0.958418	0.552115	0.556634	0.859981	0.864625	1.53866	0.656303	0.56778	1.56589	1.01678	0.187866	0.211278	0.710255	0.291649	0.894078	0.964295	1.55265	1.11836	0.255247	0.218225	1.64984	1.50855	0.366561	0.735814	0.734528	0.892194	2.95448	0.815563	0.414425	1.21193	0.725321	0.386672
CEACAM8	0.828027	0.935751	0.118015	0.215156	3.66624	0.0293093	1.44017	0.872673	1.77827	1.51354	0.944713	0.302415	2.38793	0.338306	0.0789515	0.756886	4.84243	3.78954	0.563691	0.246597	0.325848	0.268579	0.293258	0.509994	0	0.505233	6.04744	1.1935	0.710952	0.935219	0.19736	0.822758	0.25415	0.173527	0.0981076	0.15873	0.350238	1.31634	0.425801	2.48534	0.441737	0.163085	0.986973	3.06638	1.42274	0.189007	0.535064	0.217082	0.0983193
PITPNC1	1.62022	2.55085	2.49118	2.6033	2.0333	1.02118	2.16988	2.73747	2.47913	3.40414	0.906948	1.95668	2.29268	2.20905	1.70376	1.97389	2.20203	2.29876	2.98024	1.76229	1.8449	2.47715	2.185	1.96242	3.06692	1.31691	2.27194	2.24757	2.82363	2.43653	1.28856	2.06042	2.66049	1.8787	1.52272	2.42023	2.3824	3.24649	2.46934	2.08386	1.96408	2.12504	2.16158	1.25936	1.02235	1.3289	1.92338	3.20822	2.20684
AFAP1L1	2.46999	0.0833684	0.0289018	0.158977	0.10517	0.435534	0.08149	0.88692	0.66677	0.155973	0.0703568	0.422163	0.171105	0.072674	0.0149063	0.179215	0.34785	0.622383	1.37981	0.986149	0.199898	0.0303381	0.337516	0.335397	0.0267677	0.217352	0.339941	0.200459	0.466938	0.404215	0.150823	0.648724	0.102819	0.0275901	1.00965	0.504611	2.09866	0.209843	0.604918	0.066511	0.276	1.03535	0.478043	0.0577761	4.33046	0.0656014	0.36755	0.204407	0.0821535
HSPB1	5.16876	4.81716	4.28641	3.64194	3.36001	4.53625	4.9888	5.5783	3.3621	3.55354	4.17011	4.84577	4.16328	3.61118	0.623047	4.65916	4.21356	4.27755	5.46199	5.44019	3.90946	4.09309	5.8393	4.67617	5.40756	4.46422	3.83462	4.93037	5.32449	4.67494	3.39486	4.16552	5.48695	6.34111	4.32261	5.18667	4.98797	3.40627	5.41325	1.48109	4.53593	4.84658	4.05257	3.71156	5.35541	4.2213	5.31481	4.87015	4.79732
PCNA	6.74308	6.10346	5.07878	5.73365	6.28045	6.15336	6.67907	5.32367	6.16958	6.0052	6.81601	5.8036	6.58527	5.67219	5.7151	6.17624	5.74601	6.6054	6.19618	6.63002	5.83333	6.44039	5.99193	6.88414	7.54517	6.3944	7.22219	6.20108	6.90175	6.03047	6.47229	6.31665	5.82695	4.14821	5.91096	6.17776	6.22179	6.14236	6.33946	6.90607	5.23946	5.99783	6.57072	6.3327	6.44474	7.14765	5.94883	5.33836	5.38213
GSK3B	3.61429	3.38404	3.57508	4.19625	4.07903	4.07329	3.59518	3.53611	4.5026	4.63714	3.22684	3.40076	3.82547	3.69347	4.35366	3.60638	3.81854	3.69704	3.96657	4.06874	4.03903	3.59829	3.13079	3.60777	3.82671	3.31189	3.85345	3.53482	3.95066	3.44359	3.96167	3.58442	3.41553	3.08799	3.39509	3.50292	4.16305	3.60089	3.16927	4.05243	3.19502	3.26107	3.80419	3.20229	2.90578	3.77865	4.12234	3.72945	3.35685
NGF	0	0	0	0	0	0.0365101	0	0	0	0.0456889	0	0	0	0.0549544	0	0	0	0.0841404	0	0	0	0.0453611	0	0	0	0	0	0	0	0.0431723	0	0	0.052429	0	0	0	0	0	0.10375	0.0431931	0	0	0	0	0.0366885	0	0	0	0
TP63	0.0207764	0.124891	0.173971	0.0186633	0.0453448	0.602552	0.0648901	0.0144316	2.58436	0.189165	0.672186	0.0123712	0.328688	2.35389	0.0558441	0.0266103	0.0459735	0.0537508	0.0901797	0	0.108945	0.773046	0.068085	0.0303386	0.171868	0.0486926	0.0609464	0.113828	0.020007	0.184645	0.169797	0.011743	0.0223255	0.242976	0.0212124	0.629231	0.207793	0.0698114	0.0592072	0.348469	0.0112878	0.0881119	0.0164731	0.346789	0.0155739	0.0691618	0.249777	0.194851	0.0525724
CTNNA1	4.26984	1.98127	4.00959	4.2651	2.51949	4.50336	3.48322	3.22315	4.19724	1.8085	3.64227	3.91021	4.4671	4.10284	1.61358	4.25934	4.09551	3.91882	4.35454	4.28975	3.29442	4.76339	4.23131	4.26722	4.31279	3.72243	3.53513	4.03096	4.46219	4.17058	3.83956	4.23081	4.31282	3.97112	3.56518	4.21754	3.4941	4.36822	2.51743	1.32765	3.08172	3.32908	4.25201	3.70999	5.15291	3.69734	4.33448	3.60191	4.04113
KRT14	0	0.0176546	0	0.020318	0	0	0.0286331	0	0.0437426	0.0211514	0	0.0400404	0.0155819	0	0	0	0	0	0.0201322	0	0.0244453	0	0	0	0	0	0	0	0	0	0.0172158	0	0	0	0	0.0191089	0	0	0	0	0	0.0326187	0	0.0301836	0	0	0	0	0
SPHK1	1.20783	1.49838	1.21388	0.597238	1.80434	0.646279	0.922668	1.50219	0.616062	2.08999	1.28839	1.25155	1.65713	0.693107	0.378272	1.73007	2.18957	1.9757	1.22377	1.16466	0.740568	0.295361	2.14839	1.76089	1.24777	2.0969	1.52198	1.09512	1.07577	0.776536	0.275991	1.95212	1.44352	0.98835	0.536086	0.645926	0.917693	1.12382	2.55779	0.247743	0.588636	0.732441	2.19318	1.12394	0.227726	0.990152	0.758135	0.690567	1.90933
EHMT2	3.77975	4.03364	4.02363	4.33028	4.53679	4.27963	4.30947	4.46071	3.34846	3.97244	4.38508	4.76135	3.76668	3.81938	3.75039	3.76532	4.29954	3.99546	4.59203	4.70754	4.17763	3.96553	4.02336	4.48866	3.93398	4.1619	3.76628	4.6067	4.09623	4.38161	4.01989	4.1415	4.13637	4.18648	4.75584	4.77981	4.33562	3.37058	4.42624	3.56289	4.4023	4.30525	3.84205	4.4659	4.18645	4.29839	4.66457	4.19886	4.29223
RAC3	2.64964	2.36642	0.85861	1.90851	2.64176	1.71568	1.43657	2.38418	1.23668	1.75816	2.13726	3.25307	1.32686	1.10079	0.436381	1.50599	2.75898	2.44005	2.10287	3.12782	1.39709	1.72229	1.81108	1.5301	1.94722	2.55665	1.44742	2.52829	2.43513	2.50221	1.22954	1.5728	1.99796	2.03006	2.95389	1.95902	1.62473	0.927576	2.23467	1.32214	2.29601	2.767	1.0975	2.24081	1.64934	1.90947	3.11924	1.0493	1.62921
SIRT6	2.31794	2.59178	3.267	2.42035	2.69037	2.90302	3.10503	2.68816	1.9006	1.9772	3.05156	2.51937	3.1482	2.7195	1.79933	2.46099	2.71619	2.93864	2.75991	2.88011	2.32193	3.48846	2.96621	2.97357	3.56284	2.68774	2.61449	2.9004	2.80236	2.66205	2.55897	3.09629	3.24294	3.96228	2.13544	2.87368	1.63196	2.89009	2.88764	1.80752	2.26693	2.54777	2.58157	3.16623	2.64257	2.99057	2.72317	2.80021	3.3471
OGT	7.22022	6.71489	6.53739	7.00511	7.03822	7.76145	7.35465	4.78864	7.15047	6.67479	6.85367	7.15115	6.63293	6.80467	7.45519	5.68428	7.14955	6.46587	7.02202	7.90661	7.19017	6.43948	7.05227	6.62059	6.38764	7.05364	5.79808	6.52443	6.69348	6.69628	7.11538	6.71198	7.46542	5.47228	7.32648	7.12864	7.21617	6.1353	6.94338	6.95503	7.39906	7.53379	6.23155	5.44683	8.371	7.37452	7.70698	7.36949	7.17677
NDRG1	4.10523	2.65813	4.14684	3.96954	4.97527	3.92365	4.66185	4.66918	3.22322	3.34292	4.9024	5.54946	4.52061	4.6651	2.67148	4.04039	5.77323	3.71798	2.861	3.9622	5.05696	4.35283	3.82862	4.02773	3.08191	4.02596	4.99903	4.13946	4.74108	4.26737	4.19902	4.35088	4.42737	4.35534	4.17757	3.32824	4.26171	3.8559	2.25551	4.89746	3.98483	4.0153	4.18601	4.46922	3.46999	4.21316	4.79943	3.68194	3.74458
STK38	5.60508	5.62833	5.70432	5.71584	5.07164	4.93243	5.45669	5.03149	6.20365	6.08285	4.93971	5.24885	5.69198	5.70975	5.78374	5.72256	5.72772	5.23097	5.78619	5.27008	5.28088	5.5887	5.60639	5.77995	4.79702	4.78913	6.28242	5.66838	5.46523	6.19607	5.09569	5.59115	5.47241	5.6821	5.01836	6.23748	5.89602	5.60554	5.88862	5.73087	6.04226	5.62208	5.85824	4.89162	6.11165	5.06122	6.14065	5.57848	5.8248
ACP1	4.53703	4.01824	3.4439	3.95382	3.78224	4.0079	4.13678	3.36894	4.26275	4.24069	4.09055	3.89533	3.73287	3.51679	3.95394	3.54524	3.68644	4.3601	4.52297	4.22503	3.80599	3.46057	3.78488	3.54566	3.63703	4.24826	3.82997	3.8859	3.70714	4.09731	4.21323	3.88988	3.39245	3.61017	3.88417	3.98694	4.1695	3.18977	4.17835	4.24606	4.23998	4.30341	3.51506	4.42831	4.69773	4.29288	4.0973	4.06208	3.65962
FOXA1	0.0194548	0	0	0	0.0107387	0	0.00825915	0	0	0.012154	0.0212136	0	0.00894635	0.0146534	0	0.0125142	0	0	0.0115667	0	0	0	0	0	0	0.138784	0.0116063	0.011043	0	0	0.0197064	0.0219045	0	0	0.0132725	0	0	0.0241415	0	0	0.0105676	0	0	0	0.0480428	0	0	0	0
RHOQ	3.62336	3.13067	3.85371	3.75736	3.49236	3.55359	3.81775	3.07284	3.77466	3.32928	3.60191	2.39496	3.76745	4.22959	4.30739	3.7048	3.51516	3.10368	3.24067	3.63962	3.46826	3.33435	3.60729	3.47293	3.48322	3.91896	3.64587	3.53836	3.42227	3.43456	3.84896	3.81188	3.03376	3.73775	2.5588	3.7693	3.83123	4.47643	2.87539	4.28314	3.31181	3.17456	3.89295	2.71246	3.19658	3.51961	3.54553	3.57427	3.67039
ONECUT1	0.0100937	0.0104859	0	0.0240444	0	0.0100207	0.00854149	0.0139727	0.0260759	2.33416	0.0110094	0	0	0	0	0.038481	0.0149956	0	0	0	0.014533	0	0.012219	0	0	0.0271383	0.0120026	0	0.0129436	0	0	0.0113693	0.0144476	0.0113411	0.0137254	0.0337913	0	0.0494995	0	0.0118749	0.0109285	0.0194145	0.031725	0.017959	0.0496619	0.0405739	0.361367	0	0.0114724
S100A7	0	0	0	0	0	0	0	0	0	0	0	0	0	0	0	0	0	0	0	0	0	0	0.0855522	0	0	0	0	0.08009	0	0.0831618	0	0	0	0.0795485	0	0	0	0	0	0	0	0	0	0	2.59244	0	0	0	0
SRSF3	5.80037	5.20974	4.98041	5.33257	5.29069	5.16402	5.24512	4.52642	5.64484	5.37434	5.88311	5.35442	5.04016	5.27569	5.29997	5.57355	4.85782	5.78196	5.10509	5.14912	5.45272	5.13939	6.18468	4.98634	5.36348	5.57657	5.6562	5.1466	4.99326	5.57853	5.60978	5.53136	5.01451	4.92734	5.80595	5.22857	5.71355	5.02869	5.32709	5.76111	5.68906	5.78748	5.29948	6.05164	5.56598	5.56903	5.51993	5.28371	4.58517
GKN1	0	0	0.0394389	0.0400595	0	0	0	0	0	0.082211	0	0.0397483	0	0	0.0602868	0	0	0	0	0	0	0	0	0	0	0	0	0	0	0	0	0	0	0	0	0	0	0	0	0	0	0	0	0	0	0	0	0	0
MIR107	0	0	0	0	0	0	0	0	0	0	0	0	0	0	0.644852	0	0	0	0	0	0	0	0	0	0.746294	0	0	0.7684	0	0	0	0	0	0	0	0	0	0	0	0	0	0	0	0	0	0	0	0	0
NA.3	NA	NA	NA	NA	NA	NA	NA	NA	NA	NA	NA	NA	NA	NA	NA	NA	NA	NA	NA	NA	NA	NA	NA	NA	NA	NA	NA	NA	NA	NA	NA	NA	NA	NA	NA	NA	NA	NA	NA	NA	NA	NA	NA	NA	NA	NA	NA	NA	NA
[truncated: 102 more columns]

## Sheet: consensus_results
Table SIII Grouping of leukemia patients based on genes related to anoikis
Sample	Type
TCGA.AB.2949.03B	1
TCGA.AB.2943.03A	1
TCGA.AB.2851.03A	2
TCGA.AB.2822.03A	1
TCGA.AB.2939.03A	1
TCGA.AB.2931.03A	2
TCGA.AB.2921.03A	2
TCGA.AB.2937.03A	1
TCGA.AB.2917.03A	2
TCGA.AB.2849.03A	1
TCGA.AB.2990.03B	1
TCGA.AB.3007.03A	1
TCGA.AB.2948.03A	2
TCGA.AB.2971.03A	2
TCGA.AB.2955.03A	1
TCGA.AB.2892.03A	2
TCGA.AB.2898.03A	1
TCGA.AB.2857.03A	1
TCGA.AB.2995.03A	1
TCGA.AB.2928.03A	1
TCGA.AB.2913.03A	1
TCGA.AB.2866.03A	2
TCGA.AB.2927.03A	2
TCGA.AB.2870.03A	2
TCGA.AB.2956.03A	2
TCGA.AB.3002.03A	1
TCGA.AB.2834.03A	1
TCGA.AB.2875.03A	1
TCGA.AB.2901.03A	2
TCGA.AB.2858.03A	1
TCGA.AB.2853.03A	2
TCGA.AB.2846.03A	2
TCGA.AB.2994.03A	2
TCGA.AB.2977.03B	2
TCGA.AB.2991.03A	1
TCGA.AB.2886.03A	1
TCGA.AB.2806.03A	1
TCGA.AB.2873.03A	2
TCGA.AB.2885.03A	1
TCGA.AB.2876.03A	1
TCGA.AB.2999.03B	1
TCGA.AB.2982.03B	1
TCGA.AB.2815.03A	2
TCGA.AB.2810.03A	2
TCGA.AB.2941.03A	2
TCGA.AB.2896.03B	2
TCGA.AB.3009.03A	1
TCGA.AB.2859.03A	2
TCGA.AB.2934.03A	2
TCGA.AB.2919.03A	1
TCGA.AB.3000.03A	1
TCGA.AB.2973.03A	2
TCGA.AB.2924.03A	2
TCGA.AB.2915.03A	2
TCGA.AB.2952.03B	2
TCGA.AB.2938.03A	1
TCGA.AB.2935.03A	2
TCGA.AB.2823.03A	2
TCGA.AB.2814.03A	1
TCGA.AB.2899.03A	1
TCGA.AB.3001.03A	1
TCGA.AB.2813.03A	2
TCGA.AB.2942.03A	2
TCGA.AB.2930.03A	1
TCGA.AB.2811.03B	2
TCGA.AB.2842.03A	2
TCGA.AB.2911.03A	2
TCGA.AB.2825.03A	2
TCGA.AB.2920.03B	1
TCGA.AB.2998.03A	2
TCGA.AB.2916.03A	2
TCGA.AB.2839.03A	1
TCGA.AB.2965.03A	2
TCGA.AB.2944.03A	2
TCGA.AB.2861.03A	2
TCGA.AB.2843.03A	1
TCGA.AB.2933.03A	2
TCGA.AB.2894.03A	2
TCGA.AB.2888.03B	2
TCGA.AB.2900.03A	2
TCGA.AB.2966.03A	1
TCGA.AB.2963.03A	2
TCGA.AB.2975.03A	2
TCGA.AB.2881.03A	2
TCGA.AB.2950.03A	1
TCGA.AB.2821.03A	1
TCGA.AB.2912.03A	1
TCGA.AB.2890.03A	2
TCGA.AB.2812.03A	2
TCGA.AB.2817.03A	1
TCGA.AB.2970.03A	1
TCGA.AB.2984.03A	1
TCGA.AB.2946.03A	1
TCGA.AB.2828.03A	2
TCGA.AB.2845.03B	1
TCGA.AB.2883.03A	1
TCGA.AB.2959.03A	1
TCGA.AB.2893.03A	2
TCGA.AB.2863.03A	1
TCGA.AB.2871.03A	1
TCGA.AB.2979.03B	1
TCGA.AB.2987.03A	2
TCGA.AB.2891.03A	1
TCGA.AB.2820.03A	1
TCGA.AB.2897.03A	1
TCGA.AB.2884.03A	2
TCGA.AB.2882.03A	2
TCGA.AB.2981.03B	2
TCGA.AB.2877.03A	1
TCGA.AB.2918.03A	2
TCGA.AB.2889.03A	2
TCGA.AB.2808.03A	1
TCGA.AB.2983.03A	1
TCGA.AB.2830.03A	1
TCGA.AB.2929.03A	2
TCGA.AB.2836.03A	2
TCGA.AB.2910.03A	2
TCGA.AB.2856.03A	2
TCGA.AB.2844.03A	1
TCGA.AB.2908.03A	1
TCGA.AB.2940.03A	1
TCGA.AB.2869.03A	2
TCGA.AB.2996.03A	2
TCGA.AB.2867.03A	1
TCGA.AB.2826.03A	2
TCGA.AB.2872.03A	1
TCGA.AB.2840.03A	1
TCGA.AB.3008.03A	1
TCGA.AB.2992.03A	2
TCGA.AB.3011.03A	1
TCGA.AB.2914.03A	1
TCGA.AB.2818.03A	2
TCGA.AB.2986.03A	2
TCGA.AB.2847.03A	1
TCGA.AB.2805.03A	2
TCGA.AB.2819.03A	1
TCGA.AB.2988.03B	2
TCGA.AB.2841.03B	2
TCGA.AB.2976.03A	2
TCGA.AB.2895.03A	2
TCGA.AB.3012.03A	1
TCGA.AB.2874.03A	1
TCGA.AB.2862.03A	1
TCGA.AB.2980.03A	1
TCGA.AB.2865.03A	2
TCGA.AB.2835.03A	2
TCGA.AB.2878.03A	1
TCGA.AB.2936.03A	1
TCGA.AB.2880.03A	1
TCGA.AB.2932.03A	2
TCGA.AB.2925.03A	2

## Sheet: OS
Table SIII Grouping of leukemia patients based on genes related to anoikis
Sample	Type		sample	OS	_PATIENT	OS.time	subtype
TCGA.AB.2949.03B	1		TCGA.AB.2919.03A	0	TCGA.AB.2919	61	1	0.167123	0.167
TCGA.AB.2943.03A	1		TCGA.AB.2970.03A	1	TCGA.AB.2970	305	1	0.835616	0.836
TCGA.AB.2851.03A	2		TCGA.AB.2979.03B	0	TCGA.AB.2979	671	1	1.83836	1.838
TCGA.AB.2822.03A	1		TCGA.AB.3008.03A	1	TCGA.AB.3008	822	1	2.25205	2.252
TCGA.AB.2939.03A	1		TCGA.AB.2863.03A	1	TCGA.AB.2863	31	1	0.0849315	0.085
TCGA.AB.2931.03A	2		TCGA.AB.2936.03A	0	TCGA.AB.2936	59	1	0.161644	0.162
TCGA.AB.2921.03A	2		TCGA.AB.2885.03A	1	TCGA.AB.2885	214	1	0.586301	0.586
TCGA.AB.2937.03A	1		TCGA.AB.2897.03A	0	TCGA.AB.2897	243	1	0.665753	0.666
TCGA.AB.2917.03A	2		TCGA.AB.2938.03A	1	TCGA.AB.2938	304	1	0.832877	0.833
TCGA.AB.2849.03A	1		TCGA.AB.2983.03A	1	TCGA.AB.2983	335	1	0.917808	0.918
TCGA.AB.2990.03B	1		TCGA.AB.2898.03A	0	TCGA.AB.2898	393	1	1.07671	1.077
TCGA.AB.3007.03A	1		TCGA.AB.2839.03A	1	TCGA.AB.2839	486	1	1.33151	1.332
TCGA.AB.2948.03A	2		TCGA.AB.2872.03A	0	TCGA.AB.2872	638	1	1.74795	1.748
TCGA.AB.2971.03A	2		TCGA.AB.2877.03A	0	TCGA.AB.2877	638	1	1.74795	1.748
TCGA.AB.2955.03A	1		TCGA.AB.2814.03A	1	TCGA.AB.2814	792	1	2.16986	2.17
TCGA.AB.2892.03A	2		TCGA.AB.3000.03A	0	TCGA.AB.3000	1249	1	3.42192	3.422
TCGA.AB.2898.03A	1		TCGA.AB.3002.03A	1	TCGA.AB.3002	1431	1	3.92055	3.921
TCGA.AB.2857.03A	1		TCGA.AB.3001.03A	0	TCGA.AB.3001	1581	1	4.33151	4.332
TCGA.AB.2995.03A	1		TCGA.AB.2991.03A	0	TCGA.AB.2991	1826	1	5.00274	5.003
TCGA.AB.2928.03A	1		TCGA.AB.2849.03A	0	TCGA.AB.2849	2220	1	6.08219	6.082
TCGA.AB.2913.03A	1		TCGA.AB.2966.03A	1	TCGA.AB.2966	854	1	2.33973	2.34
TCGA.AB.2866.03A	2		TCGA.AB.2806.03A	1	TCGA.AB.2806	945	1	2.58904	2.589
TCGA.AB.2927.03A	2		TCGA.AB.2840.03A	1	TCGA.AB.2840	28	1	0.0767123	0.077
TCGA.AB.2870.03A	2		TCGA.AB.2928.03A	1	TCGA.AB.2928	59	1	0.161644	0.162
TCGA.AB.2956.03A	2		TCGA.AB.2844.03A	1	TCGA.AB.2844	122	1	0.334247	0.334
TCGA.AB.3002.03A	1		TCGA.AB.2982.03B	0	TCGA.AB.2982	150	1	0.410959	0.411
TCGA.AB.2834.03A	1		TCGA.AB.2886.03A	0	TCGA.AB.2886	181	1	0.49589	0.496
TCGA.AB.2875.03A	1		TCGA.AB.2875.03A	0	TCGA.AB.2875	212	1	0.580822	0.581
TCGA.AB.2901.03A	2		TCGA.AB.2937.03A	1	TCGA.AB.2937	215	1	0.589041	0.589
TCGA.AB.2858.03A	1		TCGA.AB.2834.03A	1	TCGA.AB.2834	245	1	0.671233	0.671
TCGA.AB.2853.03A	2		TCGA.AB.2912.03A	1	TCGA.AB.2912	274	1	0.750685	0.751
TCGA.AB.2846.03A	2		TCGA.AB.2830.03A	1	TCGA.AB.2830	275	1	0.753425	0.753
TCGA.AB.2994.03A	2		TCGA.AB.2857.03A	1	TCGA.AB.2857	306	1	0.838356	0.838
TCGA.AB.2977.03B	2		TCGA.AB.2878.03A	1	TCGA.AB.2878	365	1	1	1
TCGA.AB.2991.03A	1		TCGA.AB.2939.03A	0	TCGA.AB.2939	455	1	1.24658	1.247
TCGA.AB.2886.03A	1		TCGA.AB.3009.03A	1	TCGA.AB.3009	577	1	1.58082	1.581
TCGA.AB.2806.03A	1		TCGA.AB.2883.03A	0	TCGA.AB.2883	730	1	2	2
TCGA.AB.2873.03A	2		TCGA.AB.2821.03A	1	TCGA.AB.2821	822	1	2.25205	2.252
TCGA.AB.2885.03A	1		TCGA.AB.2822.03A	1	TCGA.AB.2822	973	1	2.66575	2.666
TCGA.AB.2876.03A	1		TCGA.AB.2984.03A	0	TCGA.AB.2984	1157	1	3.16986	3.17
TCGA.AB.2999.03B	1		TCGA.AB.2913.03A	0	TCGA.AB.2913	1216	1	3.33151	3.332
TCGA.AB.2982.03B	1		TCGA.AB.3007.03A	0	TCGA.AB.3007	1581	1	4.33151	4.332
TCGA.AB.2815.03A	2		TCGA.AB.3012.03A	0	TCGA.AB.3012	1887	1	5.16986	5.17
TCGA.AB.2810.03A	2		TCGA.AB.2819.03A	0	TCGA.AB.2819	2496	1	6.83836	6.838
TCGA.AB.2941.03A	2		TCGA.AB.2808.03A	0	TCGA.AB.2808	2861	1	7.83836	7.838
TCGA.AB.2896.03B	2		TCGA.AB.2871.03A	0	TCGA.AB.2871	153	1	0.419178	0.419
TCGA.AB.3009.03A	1		TCGA.AB.2867.03A	1	TCGA.AB.2867	184	1	0.50411	0.504
TCGA.AB.2859.03A	2		TCGA.AB.2843.03A	1	TCGA.AB.2843	215	1	0.589041	0.589
TCGA.AB.2934.03A	2		TCGA.AB.2817.03A	1	TCGA.AB.2817	273	1	0.747945	0.748
TCGA.AB.2919.03A	1		TCGA.AB.2845.03B	1	TCGA.AB.2845	304	1	0.832877	0.833
TCGA.AB.3000.03A	1		TCGA.AB.2959.03A	1	TCGA.AB.2959	489	1	1.33973	1.34
TCGA.AB.2973.03A	2		TCGA.AB.2955.03A	1	TCGA.AB.2955	489	1	1.33973	1.34
TCGA.AB.2924.03A	2		TCGA.AB.2858.03A	1	TCGA.AB.2858	577	1	1.58082	1.581
TCGA.AB.2915.03A	2		TCGA.AB.2847.03A	1	TCGA.AB.2847	608	1	1.66575	1.666
TCGA.AB.2952.03B	2		TCGA.AB.2899.03A	1	TCGA.AB.2899	671	1	1.83836	1.838
TCGA.AB.2938.03A	1		TCGA.AB.2980.03A	0	TCGA.AB.2980	699	1	1.91507	1.915
TCGA.AB.2935.03A	2		TCGA.AB.2914.03A	0	TCGA.AB.2914	792	1	2.16986	2.17
TCGA.AB.2823.03A	2		TCGA.AB.2862.03A	0	TCGA.AB.2862	1430	1	3.91781	3.918
TCGA.AB.2814.03A	1		TCGA.AB.2908.03A	1	TCGA.AB.2908	31	1	0.0849315	0.085
TCGA.AB.2899.03A	1		TCGA.AB.2990.03B	0	TCGA.AB.2990	457	1	1.25205	1.252
TCGA.AB.3001.03A	1		TCGA.AB.2949.03B	0	TCGA.AB.2949	699	1	1.91507	1.915
TCGA.AB.2813.03A	2		TCGA.AB.2995.03A	0	TCGA.AB.2995	1551	1	4.24932	4.249
TCGA.AB.2942.03A	2		TCGA.AB.2950.03A	0	TCGA.AB.2950	306	1	0.838356	0.838
TCGA.AB.2930.03A	1		TCGA.AB.2920.03B	1	TCGA.AB.2920	366	1	1.00274	1.003
TCGA.AB.2811.03B	2		TCGA.AB.3011.03A	0	TCGA.AB.3011	1885	1	5.16438	5.164
TCGA.AB.2842.03A	2		TCGA.AB.2874.03A	0	TCGA.AB.2874	396	1	1.08493	1.085
TCGA.AB.2911.03A	2		TCGA.AB.2880.03A	1	TCGA.AB.2880	424	1	1.16164	1.162
TCGA.AB.2825.03A	2		TCGA.AB.2876.03A	0	TCGA.AB.2876	1219	1	3.33973	3.34
TCGA.AB.2920.03B	1		TCGA.AB.2999.03B	0	TCGA.AB.2999	1735	1	4.75342	4.753
TCGA.AB.2998.03A	2		TCGA.AB.2998.03A	1	TCGA.AB.2998	31	2	0.0849315	0.085
TCGA.AB.2916.03A	2		TCGA.AB.2811.03B	1	TCGA.AB.2811	243	2	0.665753	0.666
TCGA.AB.2839.03A	1		TCGA.AB.2892.03A	0	TCGA.AB.2892	943	2	2.58356	2.584
TCGA.AB.2965.03A	2		TCGA.AB.2992.03A	1	TCGA.AB.2992	1706	2	4.67397	4.674
TCGA.AB.2944.03A	2		TCGA.AB.2828.03A	0	TCGA.AB.2828	2284	2	6.25753	6.258
TCGA.AB.2861.03A	2		TCGA.AB.2977.03B	1	TCGA.AB.2977	31	2	0.0849315	0.085
TCGA.AB.2843.03A	1		TCGA.AB.2927.03A	1	TCGA.AB.2927	90	2	0.246575	0.247
TCGA.AB.2933.03A	2		TCGA.AB.2986.03A	1	TCGA.AB.2986	212	2	0.580822	0.581
TCGA.AB.2894.03A	2		TCGA.AB.2851.03A	1	TCGA.AB.2851	242	2	0.663014	0.663
TCGA.AB.2888.03B	2		TCGA.AB.2859.03A	1	TCGA.AB.2859	304	2	0.832877	0.833
TCGA.AB.2900.03A	2		TCGA.AB.2981.03B	0	TCGA.AB.2981	487	2	1.33425	1.334
TCGA.AB.2966.03A	1		TCGA.AB.2815.03A	1	TCGA.AB.2815	822	2	2.25205	2.252
TCGA.AB.2963.03A	2		TCGA.AB.2916.03A	0	TCGA.AB.2916	882	2	2.41644	2.416
TCGA.AB.2975.03A	2		TCGA.AB.2901.03A	0	TCGA.AB.2901	59	2	0.161644	0.162
TCGA.AB.2881.03A	2		TCGA.AB.2865.03A	1	TCGA.AB.2865	61	2	0.167123	0.167
TCGA.AB.2950.03A	1		TCGA.AB.2825.03A	1	TCGA.AB.2825	212	2	0.580822	0.581
TCGA.AB.2821.03A	1		TCGA.AB.2889.03A	0	TCGA.AB.2889	304	2	0.832877	0.833
TCGA.AB.2912.03A	1		TCGA.AB.2812.03A	1	TCGA.AB.2812	366	2	1.00274	1.003
TCGA.AB.2890.03A	2		TCGA.AB.2973.03A	1	TCGA.AB.2973	609	2	1.66849	1.668
TCGA.AB.2812.03A	2		TCGA.AB.2976.03A	1	TCGA.AB.2976	915	2	2.50685	2.507
TCGA.AB.2817.03A	1		TCGA.AB.2934.03A	0	TCGA.AB.2934	28	2	0.0767123	0.077
TCGA.AB.2970.03A	1		TCGA.AB.2988.03B	1	TCGA.AB.2988	30	2	0.0821918	0.082
TCGA.AB.2984.03A	1		TCGA.AB.2813.03A	1	TCGA.AB.2813	31	2	0.0849315	0.085
TCGA.AB.2946.03A	1		TCGA.AB.2935.03A	1	TCGA.AB.2935	61	2	0.167123	0.167
TCGA.AB.2828.03A	2		TCGA.AB.2924.03A	0	TCGA.AB.2924	90	2	0.246575	0.247
TCGA.AB.2845.03B	1		TCGA.AB.2870.03A	1	TCGA.AB.2870	153	2	0.419178	0.419
TCGA.AB.2883.03A	1		TCGA.AB.2956.03A	1	TCGA.AB.2956	183	2	0.50137	0.501
TCGA.AB.2959.03A	1		TCGA.AB.2900.03A	1	TCGA.AB.2900	184	2	0.50411	0.504
TCGA.AB.2893.03A	2		TCGA.AB.2965.03A	1	TCGA.AB.2965	335	2	0.917808	0.918
TCGA.AB.2863.03A	1		TCGA.AB.2881.03A	0	TCGA.AB.2881	393	2	1.07671	1.077
TCGA.AB.2871.03A	1		TCGA.AB.2805.03A	1	TCGA.AB.2805	577	2	1.58082	1.581
TCGA.AB.2979.03B	1		TCGA.AB.2971.03A	1	TCGA.AB.2971	792	2	2.16986	2.17
TCGA.AB.2987.03A	2		TCGA.AB.2841.03B	1	TCGA.AB.2841	1401	2	3.83836	3.838
TCGA.AB.2891.03A	1		TCGA.AB.2952.03B	1	TCGA.AB.2952	31	2	0.0849315	0.085
TCGA.AB.2820.03A	1		TCGA.AB.2933.03A	1	TCGA.AB.2933	122	2	0.334247	0.334
TCGA.AB.2897.03A	1		TCGA.AB.2929.03A	1	TCGA.AB.2929	123	2	0.336986	0.337
TCGA.AB.2884.03A	2		TCGA.AB.2856.03A	1	TCGA.AB.2856	150	2	0.410959	0.411
TCGA.AB.2882.03A	2		TCGA.AB.2866.03A	1	TCGA.AB.2866	153	2	0.419178	0.419
TCGA.AB.2981.03B	2		TCGA.AB.2893.03A	1	TCGA.AB.2893	212	2	0.580822	0.581
TCGA.AB.2877.03A	1		TCGA.AB.2896.03B	1	TCGA.AB.2896	214	2	0.586301	0.586
TCGA.AB.2918.03A	2		TCGA.AB.2925.03A	1	TCGA.AB.2925	243	2	0.665753	0.666
TCGA.AB.2889.03A	2		TCGA.AB.2818.03A	1	TCGA.AB.2818	303	2	0.830137	0.83
TCGA.AB.2808.03A	1		TCGA.AB.2884.03A	1	TCGA.AB.2884	731	2	2.00274	2.003
TCGA.AB.2983.03A	1		TCGA.AB.2917.03A	0	TCGA.AB.2917	1216	2	3.33151	3.332
TCGA.AB.2830.03A	1		TCGA.AB.2846.03A	1	TCGA.AB.2846	1402	2	3.8411	3.841
TCGA.AB.2929.03A	2		TCGA.AB.2996.03A	0	TCGA.AB.2996	1581	2	4.33151	4.332
TCGA.AB.2836.03A	2		TCGA.AB.2963.03A	1	TCGA.AB.2963	1642	2	4.49863	4.499
TCGA.AB.2910.03A	2		TCGA.AB.2835.03A	0	TCGA.AB.2835	1673	2	4.58356	4.584
TCGA.AB.2856.03A	2		TCGA.AB.2873.03A	0	TCGA.AB.2873	273	2	0.747945	0.748
TCGA.AB.2844.03A	1		TCGA.AB.2942.03A	0	TCGA.AB.2942	641	2	1.75616	1.756
TCGA.AB.2908.03A	1		TCGA.AB.2911.03A	0	TCGA.AB.2911	1186	2	3.24932	3.249
TCGA.AB.2940.03A	1		TCGA.AB.2994.03A	0	TCGA.AB.2994	1798	2	4.92603	4.926
TCGA.AB.2869.03A	2		TCGA.AB.2869.03A	0	TCGA.AB.2869	243	2	0.665753	0.666
TCGA.AB.2996.03A	2		TCGA.AB.2810.03A	1	TCGA.AB.2810	31	2	0.0849315	0.085
TCGA.AB.2867.03A	1		TCGA.AB.2853.03A	1	TCGA.AB.2853	89	2	0.243836	0.244
TCGA.AB.2826.03A	2		TCGA.AB.2895.03A	1	TCGA.AB.2895	153	2	0.419178	0.419
TCGA.AB.2872.03A	1		TCGA.AB.2894.03A	1	TCGA.AB.2894	181	2	0.49589	0.496
TCGA.AB.2840.03A	1		TCGA.AB.2987.03A	1	TCGA.AB.2987	184	2	0.50411	0.504
TCGA.AB.3008.03A	1		TCGA.AB.2888.03B	0	TCGA.AB.2888	334	2	0.915068	0.915
TCGA.AB.2992.03A	2		TCGA.AB.2882.03A	1	TCGA.AB.2882	365	2	1	1
TCGA.AB.3011.03A	1		TCGA.AB.2836.03A	1	TCGA.AB.2836	518	2	1.41918	1.419
TCGA.AB.2914.03A	1		TCGA.AB.2948.03A	1	TCGA.AB.2948	580	2	1.58904	1.589
TCGA.AB.2818.03A	2		TCGA.AB.2826.03A	1	TCGA.AB.2826	731	2	2.00274	2.003
TCGA.AB.2986.03A	2		TCGA.AB.2840.11B	1	TCGA.AB.2840	28	#N/A
TCGA.AB.2847.03A	1		TCGA.AB.2840.03D	1	TCGA.AB.2840	28	#N/A
TCGA.AB.2805.03A	2		TCGA.AB.2988.03A	1	TCGA.AB.2988	30	#N/A
TCGA.AB.2819.03A	1		TCGA.AB.2824.03C	1	TCGA.AB.2824	30	#N/A
TCGA.AB.2988.03B	2		TCGA.AB.2824.03A	1	TCGA.AB.2824	30	#N/A
TCGA.AB.2841.03B	2		TCGA.AB.2824.03B	1	TCGA.AB.2824	30	#N/A
TCGA.AB.2976.03A	2		TCGA.AB.2988.11A	1	TCGA.AB.2988	30	#N/A
TCGA.AB.2895.03A	2		TCGA.AB.2909.03A	0	TCGA.AB.2909	30	#N/A
TCGA.AB.3012.03A	1		TCGA.AB.2840.11A	1	TCGA.AB.2840	28	#N/A
TCGA.AB.2874.03A	1		TCGA.AB.2909.11A	0	TCGA.AB.2909	30	#N/A
TCGA.AB.2862.03A	1		TCGA.AB.2934.11A	0	TCGA.AB.2934	28	#N/A
TCGA.AB.2980.03A	1		TCGA.AB.2840.11D	1	TCGA.AB.2840	28	#N/A
TCGA.AB.2865.03A	2		TCGA.AB.2840.11C	1	TCGA.AB.2840	28	#N/A
TCGA.AB.2835.03A	2		TCGA.AB.2840.03B	1	TCGA.AB.2840	28	#N/A
TCGA.AB.2878.03A	1		TCGA.AB.2840.03C	1	TCGA.AB.2840	28	#N/A
TCGA.AB.2936.03A	1		TCGA.AB.2824.11B	1	TCGA.AB.2824	30	#N/A
TCGA.AB.2880.03A	1		TCGA.AB.2824.11A	1	TCGA.AB.2824	30	#N/A
TCGA.AB.2932.03A	2		TCGA.AB.2988.03C	1	TCGA.AB.2988	30	#N/A
TCGA.AB.2925.03A	2		TCGA.AB.2824.11C	1	TCGA.AB.2824	30	#N/A
			TCGA.AB.2972.03A	1	TCGA.AB.2972	30	#N/A
			TCGA.AB.2972.11A	1	TCGA.AB.2972	30	#N/A
			TCGA.AB.2998.11A	1	TCGA.AB.2998	31	#N/A
			TCGA.AB.2810.11B	1	TCGA.AB.2810	31	#N/A
			TCGA.AB.2810.11C	1	TCGA.AB.2810	31	#N/A
			TCGA.AB.2810.11A	1	TCGA.AB.2810	31	#N/A
			TCGA.AB.2810.03C	1	TCGA.AB.2810	31	#N/A
			TCGA.AB.2810.03B	1	TCGA.AB.2810	31	#N/A
			TCGA.AB.2947.03A	0	TCGA.AB.2947	31	#N/A
			TCGA.AB.2947.11A	0	TCGA.AB.2947	31	#N/A
			TCGA.AB.2923.11A	1	TCGA.AB.2923	31	#N/A
			TCGA.AB.2923.03A	1	TCGA.AB.2923	31	#N/A
			TCGA.AB.2908.11A	1	TCGA.AB.2908	31	#N/A
			TCGA.AB.2813.03B	1	TCGA.AB.2813	31	#N/A
			TCGA.AB.2813.03C	1	TCGA.AB.2813	31	#N/A
			TCGA.AB.2813.11A	1	TCGA.AB.2813	31	#N/A
			TCGA.AB.2813.11C	1	TCGA.AB.2813	31	#N/A
			TCGA.AB.2813.11B	1	TCGA.AB.2813	31	#N/A
			TCGA.AB.2863.03D	1	TCGA.AB.2863	31	#N/A
			TCGA.AB.2863.03C	1	TCGA.AB.2863	31	#N/A
			TCGA.AB.2863.03B	1	TCGA.AB.2863	31	#N/A
			TCGA.AB.2863.11A	1	TCGA.AB.2863	31	#N/A
			TCGA.AB.2863.11B	1	TCGA.AB.2863	31	#N/A
			TCGA.AB.2863.11D	1	TCGA.AB.2863	31	#N/A
			TCGA.AB.2977.11A	1	TCGA.AB.2977	31	#N/A
			TCGA.AB.2977.03A	1	TCGA.AB.2977	31	#N/A
			TCGA.AB.2952.11A	1	TCGA.AB.2952	31	#N/A
			TCGA.AB.2952.03A	1	TCGA.AB.2952	31	#N/A
			TCGA.AB.2928.11A	1	TCGA.AB.2928	59	#N/A
			TCGA.AB.2936.11A	0	TCGA.AB.2936	59	#N/A
			TCGA.AB.2901.11A	0	TCGA.AB.2901	59	#N/A
			TCGA.AB.2865.03C	1	TCGA.AB.2865	61	#N/A
			TCGA.AB.2865.03B	1	TCGA.AB.2865	61	#N/A
			TCGA.AB.2865.11B	1	TCGA.AB.2865	61	#N/A
			TCGA.AB.2865.11C	1	TCGA.AB.2865	61	#N/A
			TCGA.AB.2865.11A	1	TCGA.AB.2865	61	#N/A
			TCGA.AB.2850.11B	1	TCGA.AB.2850	61	#N/A
			TCGA.AB.2850.11C	1	TCGA.AB.2850	61	#N/A
			TCGA.AB.2850.11A	1	TCGA.AB.2850	61	#N/A
			TCGA.AB.2850.03A	1	TCGA.AB.2850	61	#N/A
			TCGA.AB.2850.03C	1	TCGA.AB.2850	61	#N/A
			TCGA.AB.2850.03B	1	TCGA.AB.2850	61	#N/A
			TCGA.AB.2919.11A	0	TCGA.AB.2919	61	#N/A
			TCGA.AB.2935.11A	1	TCGA.AB.2935	61	#N/A
			TCGA.AB.2809.03D	1	TCGA.AB.2809	62	#N/A
			TCGA.AB.2809.03C	1	TCGA.AB.2809	62	#N/A
			TCGA.AB.2809.03B	1	TCGA.AB.2809	62	#N/A
			TCGA.AB.2809.03A	1	TCGA.AB.2809	62	#N/A
			TCGA.AB.2809.11A	1	TCGA.AB.2809	62	#N/A
			TCGA.AB.2809.11B	1	TCGA.AB.2809	62	#N/A
			TCGA.AB.2809.11C	1	TCGA.AB.2809	62	#N/A
			TCGA.AB.2809.11D	1	TCGA.AB.2809	62	#N/A
			TCGA.AB.2853.11D	1	TCGA.AB.2853	89	#N/A
			TCGA.AB.2853.11A	1	TCGA.AB.2853	89	#N/A
			TCGA.AB.2853.11B	1	TCGA.AB.2853	89	#N/A
			TCGA.AB.2853.03D	1	TCGA.AB.2853	89	#N/A
			TCGA.AB.2853.03B	1	TCGA.AB.2853	89	#N/A
			TCGA.AB.2853.03C	1	TCGA.AB.2853	89	#N/A
			TCGA.AB.2927.11A	1	TCGA.AB.2927	90	#N/A
			TCGA.AB.2924.11A	0	TCGA.AB.2924	90	#N/A
			TCGA.AB.2974.11A	1	TCGA.AB.2974	92	#N/A
			TCGA.AB.2974.03A	1	TCGA.AB.2974	92	#N/A
			TCGA.AB.2844.11A	1	TCGA.AB.2844	122	#N/A
			TCGA.AB.2844.11C	1	TCGA.AB.2844	122	#N/A
			TCGA.AB.2844.11B	1	TCGA.AB.2844	122	#N/A
			TCGA.AB.2844.03B	1	TCGA.AB.2844	122	#N/A
			TCGA.AB.2844.03C	1	TCGA.AB.2844	122	#N/A
			TCGA.AB.2933.11A	1	TCGA.AB.2933	122	#N/A
			TCGA.AB.2929.11A	1	TCGA.AB.2929	123	#N/A
			TCGA.AB.2982.11A	0	TCGA.AB.2982	150	#N/A
			TCGA.AB.2982.03A	0	TCGA.AB.2982	150	#N/A
			TCGA.AB.2856.11A	1	TCGA.AB.2856	150	#N/A
			TCGA.AB.2856.11B	1	TCGA.AB.2856	150	#N/A
			TCGA.AB.2856.11C	1	TCGA.AB.2856	150	#N/A
			TCGA.AB.2856.03B	1	TCGA.AB.2856	150	#N/A
			TCGA.AB.2868.11C	1	TCGA.AB.2868	151	#N/A
			TCGA.AB.2868.11B	1	TCGA.AB.2868	151	#N/A
			TCGA.AB.2868.11A	1	TCGA.AB.2868	151	#N/A
			TCGA.AB.2868.03C	1	TCGA.AB.2868	151	#N/A
			TCGA.AB.2868.03A	1	TCGA.AB.2868	151	#N/A
			TCGA.AB.2868.03B	1	TCGA.AB.2868	151	#N/A
			TCGA.AB.2866.11A	1	TCGA.AB.2866	153	#N/A
			TCGA.AB.2866.11C	1	TCGA.AB.2866	153	#N/A
			TCGA.AB.2866.11B	1	TCGA.AB.2866	153	#N/A
			TCGA.AB.2866.03B	1	TCGA.AB.2866	153	#N/A
			TCGA.AB.2866.03C	1	TCGA.AB.2866	153	#N/A
			TCGA.AB.2871.11A	0	TCGA.AB.2871	153	#N/A
			TCGA.AB.2870.11A	1	TCGA.AB.2870	153	#N/A
			TCGA.AB.2895.11A	1	TCGA.AB.2895	153	#N/A
			TCGA.AB.2886.11A	0	TCGA.AB.2886	181	#N/A
			TCGA.AB.2807.11D	1	TCGA.AB.2807	181	#N/A
			TCGA.AB.2807.11B	1	TCGA.AB.2807	181	#N/A
			TCGA.AB.2807.11C	1	TCGA.AB.2807	181	#N/A
			TCGA.AB.2807.11A	1	TCGA.AB.2807	181	#N/A
			TCGA.AB.2807.03A	1	TCGA.AB.2807	181	#N/A
			TCGA.AB.2807.03C	1	TCGA.AB.2807	181	#N/A
			TCGA.AB.2807.03B	1	TCGA.AB.2807	181	#N/A
			TCGA.AB.2807.03D	1	TCGA.AB.2807	181	#N/A
			TCGA.AB.2894.11A	1	TCGA.AB.2894	181	#N/A
			TCGA.AB.2956.11A	1	TCGA.AB.2956	183	#N/A
			TCGA.AB.2987.11A	1	TCGA.AB.2987	184	#N/A
			TCGA.AB.2900.11A	1	TCGA.AB.2900	184	#N/A
			TCGA.AB.2867.03C	1	TCGA.AB.2867	184	#N/A
			TCGA.AB.2867.03B	1	TCGA.AB.2867	184	#N/A
			TCGA.AB.2867.11A	1	TCGA.AB.2867	184	#N/A
			TCGA.AB.2867.11B	1	TCGA.AB.2867	184	#N/A
			TCGA.AB.2867.11C	1	TCGA.AB.2867	184	#N/A
			TCGA.AB.2855.03A	1	TCGA.AB.2855	212	#N/A
			TCGA.AB.2855.03B	1	TCGA.AB.2855	212	#N/A
			TCGA.AB.2855.03C	1	TCGA.AB.2855	212	#N/A
			TCGA.AB.2855.11A	1	TCGA.AB.2855	212	#N/A
			TCGA.AB.2855.11B	1	TCGA.AB.2855	212	#N/A
			TCGA.AB.2875.11A	0	TCGA.AB.2875	212	#N/A
			TCGA.AB.2893.11A	1	TCGA.AB.2893	212	#N/A
			TCGA.AB.2986.11A	1	TCGA.AB.2986	212	#N/A
			TCGA.AB.2825.03C	1	TCGA.AB.2825	212	#N/A
			TCGA.AB.2825.11C	1	TCGA.AB.2825	212	#N/A
			TCGA.AB.2825.11B	1	TCGA.AB.2825	212	#N/A
			TCGA.AB.2825.03D	1	TCGA.AB.2825	212	#N/A
			TCGA.AB.2825.11A	1	TCGA.AB.2825	212	#N/A
			TCGA.AB.2825.11D	1	TCGA.AB.2825	212	#N/A
			TCGA.AB.2825.03B	1	TCGA.AB.2825	212	#N/A
			TCGA.AB.2885.11A	1	TCGA.AB.2885	214	#N/A
			TCGA.AB.2896.03A	1	TCGA.AB.2896	214	#N/A
			TCGA.AB.2896.11A	1	TCGA.AB.2896	214	#N/A
			TCGA.AB.2937.11A	1	TCGA.AB.2937	215	#N/A
			TCGA.AB.2843.11D	1	TCGA.AB.2843	215	#N/A
			TCGA.AB.2843.11B	1	TCGA.AB.2843	215	#N/A
			TCGA.AB.2843.11C	1	TCGA.AB.2843	215	#N/A
			TCGA.AB.2843.11A	1	TCGA.AB.2843	215	#N/A
			TCGA.AB.2843.03C	1	TCGA.AB.2843	215	#N/A
			TCGA.AB.2843.03B	1	TCGA.AB.2843	215	#N/A
			TCGA.AB.2843.03D	1	TCGA.AB.2843	215	#N/A
			TCGA.AB.2851.11A	1	TCGA.AB.2851	242	#N/A
			TCGA.AB.2851.11C	1	TCGA.AB.2851	242	#N/A
			TCGA.AB.2851.03B	1	TCGA.AB.2851	242	#N/A
			TCGA.AB.2851.03C	1	TCGA.AB.2851	242	#N/A
			TCGA.AB.2851.11B	1	TCGA.AB.2851	242	#N/A
			TCGA.AB.2869.11A	0	TCGA.AB.2869	243	#N/A
			TCGA.AB.2925.11A	1	TCGA.AB.2925	243	#N/A
			TCGA.AB.2945.11A	1	TCGA.AB.2945	243	#N/A
			TCGA.AB.2945.03A	1	TCGA.AB.2945	243	#N/A
			TCGA.AB.2811.11C	1	TCGA.AB.2811	243	#N/A
			TCGA.AB.2811.03A	1	TCGA.AB.2811	243	#N/A
			TCGA.AB.2811.03C	1	TCGA.AB.2811	243	#N/A
			TCGA.AB.2811.11B	1	TCGA.AB.2811	243	#N/A
			TCGA.AB.2811.11A	1	TCGA.AB.2811	243	#N/A
			TCGA.AB.2897.11A	0	TCGA.AB.2897	243	#N/A
			TCGA.AB.2879.11A	0	TCGA.AB.2879	245	#N/A
			TCGA.AB.2879.03A	0	TCGA.AB.2879	245	#N/A
			TCGA.AB.2834.03B	1	TCGA.AB.2834	245	#N/A
			TCGA.AB.2834.11A	1	TCGA.AB.2834	245	#N/A
			TCGA.AB.2834.11B	1	TCGA.AB.2834	245	#N/A
			TCGA.AB.2834.11C	1	TCGA.AB.2834	245	#N/A
			TCGA.AB.2816.03C	1	TCGA.AB.2816	245	#N/A
			TCGA.AB.2816.03B	1	TCGA.AB.2816	245	#N/A
			TCGA.AB.2816.03A	1	TCGA.AB.2816	245	#N/A
			TCGA.AB.2816.11A	1	TCGA.AB.2816	245	#N/A
			TCGA.AB.2816.11B	1	TCGA.AB.2816	245	#N/A
			TCGA.AB.2816.11C	1	TCGA.AB.2816	245	#N/A
			TCGA.AB.2985.11A	1	TCGA.AB.2985	273	#N/A
			TCGA.AB.2985.03A	1	TCGA.AB.2985	273	#N/A
			TCGA.AB.2817.11A	1	TCGA.AB.2817	273	#N/A
			TCGA.AB.2817.11C	1	TCGA.AB.2817	273	#N/A
			TCGA.AB.2817.11B	1	TCGA.AB.2817	273	#N/A
			TCGA.AB.2817.03B	1	TCGA.AB.2817	273	#N/A
			TCGA.AB.2817.03C	1	TCGA.AB.2817	273	#N/A
			TCGA.AB.2827.11A	1	TCGA.AB.2827	273	#N/A
			TCGA.AB.2827.11B	1	TCGA.AB.2827	273	#N/A
			TCGA.AB.2827.11C	1	TCGA.AB.2827	273	#N/A
			TCGA.AB.2827.03C	1	TCGA.AB.2827	273	#N/A
			TCGA.AB.2827.03B	1	TCGA.AB.2827	273	#N/A
			TCGA.AB.2827.03A	1	TCGA.AB.2827	273	#N/A
			TCGA.AB.2829.11B	1	TCGA.AB.2829	273	#N/A
			TCGA.AB.2829.11C	1	TCGA.AB.2829	273	#N/A
			TCGA.AB.2829.11A	1	TCGA.AB.2829	273	#N/A
			TCGA.AB.2829.03A	1	TCGA.AB.2829	273	#N/A
			TCGA.AB.2829.03C	1	TCGA.AB.2829	273	#N/A
			TCGA.AB.2829.03B	1	TCGA.AB.2829	273	#N/A
			TCGA.AB.2873.11A	0	TCGA.AB.2873	273	#N/A
			TCGA.AB.2912.11A	1	TCGA.AB.2912	274	#N/A
			TCGA.AB.2830.03C	1	TCGA.AB.2830	275	#N/A
			TCGA.AB.2830.03B	1	TCGA.AB.2830	275	#N/A
			TCGA.AB.2830.11A	1	TCGA.AB.2830	275	#N/A
			TCGA.AB.2830.11B	1	TCGA.AB.2830	275	#N/A
			TCGA.AB.2830.11C	1	TCGA.AB.2830	275	#N/A
			TCGA.AB.2818.11B	1	TCGA.AB.2818	303	#N/A
			TCGA.AB.2818.11C	1	TCGA.AB.2818	303	#N/A
			TCGA.AB.2818.11A	1	TCGA.AB.2818	303	#N/A
			TCGA.AB.2818.03C	1	TCGA.AB.2818	303	#N/A
			TCGA.AB.2818.03B	1	TCGA.AB.2818	303	#N/A
			TCGA.AB.2845.03D	1	TCGA.AB.2845	304	#N/A
			TCGA.AB.2845.03C	1	TCGA.AB.2845	304	#N/A
			TCGA.AB.2845.03A	1	TCGA.AB.2845	304	#N/A
			TCGA.AB.2845.11A	1	TCGA.AB.2845	304	#N/A
			TCGA.AB.2845.11B	1	TCGA.AB.2845	304	#N/A
			TCGA.AB.2845.11D	1	TCGA.AB.2845	304	#N/A
			TCGA.AB.2938.11A	1	TCGA.AB.2938	304	#N/A
			TCGA.AB.2859.03B	1	TCGA.AB.2859	304	#N/A
			TCGA.AB.2859.11C	1	TCGA.AB.2859	304	#N/A
			TCGA.AB.2859.11A	1	TCGA.AB.2859	304	#N/A
			TCGA.AB.2859.11B	1	TCGA.AB.2859	304	#N/A
			TCGA.AB.2889.11A	0	TCGA.AB.2889	304	#N/A
			TCGA.AB.2970.11A	1	TCGA.AB.2970	305	#N/A
			TCGA.AB.2950.11A	0	TCGA.AB.2950	306	#N/A
			TCGA.AB.2857.11A	1	TCGA.AB.2857	306	#N/A
			TCGA.AB.2857.11C	1	TCGA.AB.2857	306	#N/A
			TCGA.AB.2857.11B	1	TCGA.AB.2857	306	#N/A
			TCGA.AB.2857.03B	1	TCGA.AB.2857	306	#N/A
			TCGA.AB.2857.03C	1	TCGA.AB.2857	306	#N/A
			TCGA.AB.2888.11A	0	TCGA.AB.2888	334	#N/A
			TCGA.AB.2888.03A	0	TCGA.AB.2888	334	#N/A
			TCGA.AB.2983.11A	1	TCGA.AB.2983	335	#N/A
			TCGA.AB.2965.11A	1	TCGA.AB.2965	335	#N/A
			TCGA.AB.2802.11C	1	TCGA.AB.2802	365	#N/A
			TCGA.AB.2802.11B	1	TCGA.AB.2802	365	#N/A
			TCGA.AB.2802.11A	1	TCGA.AB.2802	365	#N/A
			TCGA.AB.2802.03C	1	TCGA.AB.2802	365	#N/A
			TCGA.AB.2802.03D	1	TCGA.AB.2802	365	#N/A
			TCGA.AB.2802.11D	1	TCGA.AB.2802	365	#N/A
			TCGA.AB.2802.03B	1	TCGA.AB.2802	365	#N/A
			TCGA.AB.2802.03A	1	TCGA.AB.2802	365	#N/A
			TCGA.AB.2989.11A	1	TCGA.AB.2989	365	#N/A
			TCGA.AB.2989.03A	1	TCGA.AB.2989	365	#N/A
			TCGA.AB.2882.11A	1	TCGA.AB.2882	365	#N/A
			TCGA.AB.2838.11A	1	TCGA.AB.2838	365	#N/A
			TCGA.AB.2838.11B	1	TCGA.AB.2838	365	#N/A
			TCGA.AB.2838.11C	1	TCGA.AB.2838	365	#N/A
			TCGA.AB.2838.03C	1	TCGA.AB.2838	365	#N/A
			TCGA.AB.2838.03B	1	TCGA.AB.2838	365	#N/A
			TCGA.AB.2838.03A	1	TCGA.AB.2838	365	#N/A
			TCGA.AB.2878.11A	1	TCGA.AB.2878	365	#N/A
			TCGA.AB.2832.11B	1	TCGA.AB.2832	365	#N/A
			TCGA.AB.2832.11C	1	TCGA.AB.2832	365	#N/A
			TCGA.AB.2832.11A	1	TCGA.AB.2832	365	#N/A
			TCGA.AB.2832.03A	1	TCGA.AB.2832	365	#N/A
			TCGA.AB.2832.03C	1	TCGA.AB.2832	365	#N/A
			TCGA.AB.2832.03B	1	TCGA.AB.2832	365	#N/A
			TCGA.AB.2812.11A	1	TCGA.AB.2812	366	#N/A
			TCGA.AB.2812.11B	1	TCGA.AB.2812	366	#N/A
			TCGA.AB.2812.11C	1	TCGA.AB.2812	366	#N/A
			TCGA.AB.2812.03C	1	TCGA.AB.2812	366	#N/A
			TCGA.AB.2812.03B	1	TCGA.AB.2812	366	#N/A
			TCGA.AB.2854.11B	1	TCGA.AB.2854	366	#N/A
			TCGA.AB.2854.11C	1	TCGA.AB.2854	366	#N/A
			TCGA.AB.2854.11A	1	TCGA.AB.2854	366	#N/A
			TCGA.AB.2854.03A	1	TCGA.AB.2854	366	#N/A
			TCGA.AB.2854.03C	1	TCGA.AB.2854	366	#N/A
			TCGA.AB.2854.03B	1	TCGA.AB.2854	366	#N/A
			TCGA.AB.2920.11A	1	TCGA.AB.2920	366	#N/A
			TCGA.AB.2920.03A	1	TCGA.AB.2920	366	#N/A
			TCGA.AB.2898.11A	0	TCGA.AB.2898	393	#N/A
			TCGA.AB.2881.11A	0	TCGA.AB.2881	393	#N/A
			TCGA.AB.2874.11A	0	TCGA.AB.2874	396	#N/A
			TCGA.AB.2880.11A	1	TCGA.AB.2880	424	#N/A
			TCGA.AB.2860.11B	1	TCGA.AB.2860	427	#N/A
			TCGA.AB.2860.11A	1	TCGA.AB.2860	427	#N/A
			TCGA.AB.2860.11C	1	TCGA.AB.2860	427	#N/A
			TCGA.AB.2860.03A	1	TCGA.AB.2860	427	#N/A
			TCGA.AB.2860.03B	1	TCGA.AB.2860	427	#N/A
			TCGA.AB.2860.03C	1	TCGA.AB.2860	427	#N/A
			TCGA.AB.2939.11A	0	TCGA.AB.2939	455	#N/A
			TCGA.AB.2848.11A	1	TCGA.AB.2848	455	#N/A
			TCGA.AB.2848.11C	1	TCGA.AB.2848	455	#N/A
			TCGA.AB.2848.11B	1	TCGA.AB.2848	455	#N/A
			TCGA.AB.2848.03B	1	TCGA.AB.2848	455	#N/A
			TCGA.AB.2848.03C	1	TCGA.AB.2848	455	#N/A
			TCGA.AB.2848.03A	1	TCGA.AB.2848	455	#N/A
			TCGA.AB.2833.11B	1	TCGA.AB.2833	456	#N/A
			TCGA.AB.2833.11C	1	TCGA.AB.2833	456	#N/A
			TCGA.AB.2833.03A	1	TCGA.AB.2833	456	#N/A
			TCGA.AB.2833.03B	1	TCGA.AB.2833	456	#N/A
			TCGA.AB.2833.03C	1	TCGA.AB.2833	456	#N/A
			TCGA.AB.2833.11A	1	TCGA.AB.2833	456	#N/A
			TCGA.AB.2926.03A	1	TCGA.AB.2926	457	#N/A
			TCGA.AB.2926.11A	1	TCGA.AB.2926	457	#N/A
			TCGA.AB.2990.03A	0	TCGA.AB.2990	457	#N/A
			TCGA.AB.2990.11A	0	TCGA.AB.2990	457	#N/A
			TCGA.AB.2968.03A	1	TCGA.AB.2968	458	#N/A
			TCGA.AB.2968.11A	1	TCGA.AB.2968	458	#N/A
			TCGA.AB.3006.03A	1	TCGA.AB.3006	485	#N/A
			TCGA.AB.3006.11A	1	TCGA.AB.3006	485	#N/A
			TCGA.AB.2839.03B	1	TCGA.AB.2839	486	#N/A
			TCGA.AB.2839.03C	1	TCGA.AB.2839	486	#N/A
			TCGA.AB.2839.11A	1	TCGA.AB.2839	486	#N/A
			TCGA.AB.2839.11C	1	TCGA.AB.2839	486	#N/A
			TCGA.AB.2839.11B	1	TCGA.AB.2839	486	#N/A
			TCGA.AB.2981.03C	0	TCGA.AB.2981	487	#N/A
			TCGA.AB.2981.03A	0	TCGA.AB.2981	487	#N/A
			TCGA.AB.2981.11A	0	TCGA.AB.2981	487	#N/A
			TCGA.AB.2959.11A	1	TCGA.AB.2959	489	#N/A
			TCGA.AB.2955.11A	1	TCGA.AB.2955	489	#N/A
			TCGA.AB.2904.03A	1	TCGA.AB.2904	517	#N/A
			TCGA.AB.2904.11A	1	TCGA.AB.2904	517	#N/A
			TCGA.AB.2836.11B	1	TCGA.AB.2836	518	#N/A
			TCGA.AB.2836.11C	1	TCGA.AB.2836	518	#N/A
			TCGA.AB.2836.11A	1	TCGA.AB.2836	518	#N/A
			TCGA.AB.2836.03C	1	TCGA.AB.2836	518	#N/A
			TCGA.AB.2836.03B	1	TCGA.AB.2836	518	#N/A
			TCGA.AB.2906.03A	0	TCGA.AB.2906	577	#N/A
			TCGA.AB.2906.11A	0	TCGA.AB.2906	577	#N/A
			TCGA.AB.2805.03C	1	TCGA.AB.2805	577	#N/A
			TCGA.AB.2805.03B	1	TCGA.AB.2805	577	#N/A
			TCGA.AB.2805.11A	1	TCGA.AB.2805	577	#N/A
			TCGA.AB.2805.11B	1	TCGA.AB.2805	577	#N/A
			TCGA.AB.2805.11C	1	TCGA.AB.2805	577	#N/A
			TCGA.AB.2858.12A	1	TCGA.AB.2858	577	#N/A
			TCGA.AB.2858.11B	1	TCGA.AB.2858	577	#N/A
			TCGA.AB.2858.11C	1	TCGA.AB.2858	577	#N/A
			TCGA.AB.2858.11A	1	TCGA.AB.2858	577	#N/A
			TCGA.AB.2858.03C	1	TCGA.AB.2858	577	#N/A
			TCGA.AB.2858.03B	1	TCGA.AB.2858	577	#N/A
			TCGA.AB.2858.03D	1	TCGA.AB.2858	577	#N/A
			TCGA.AB.3009.11A	1	TCGA.AB.3009	577	#N/A
			TCGA.AB.2864.03D	1	TCGA.AB.2864	577	#N/A
			TCGA.AB.2864.11D	1	TCGA.AB.2864	577	#N/A
			TCGA.AB.2864.11C	1	TCGA.AB.2864	577	#N/A
			TCGA.AB.2864.03A	1	TCGA.AB.2864	577	#N/A
			TCGA.AB.2864.03B	1	TCGA.AB.2864	577	#N/A
			TCGA.AB.2864.11B	1	TCGA.AB.2864	577	#N/A
			TCGA.AB.2864.11A	1	TCGA.AB.2864	577	#N/A
			TCGA.AB.2864.03C	1	TCGA.AB.2864	577	#N/A
			TCGA.AB.2948.11A	1	TCGA.AB.2948	580	#N/A
			TCGA.AB.2847.11B	1	TCGA.AB.2847	608	#N/A
			TCGA.AB.2847.11C	1	TCGA.AB.2847	608	#N/A
			TCGA.AB.2847.11A	1	TCGA.AB.2847	608	#N/A
			TCGA.AB.2847.03C	1	TCGA.AB.2847	608	#N/A
			TCGA.AB.2847.03B	1	TCGA.AB.2847	608	#N/A
			TCGA.AB.2847.11D	1	TCGA.AB.2847	608	#N/A
			TCGA.AB.2847.03D	1	TCGA.AB.2847	608	#N/A
			TCGA.AB.2973.11A	1	TCGA.AB.2973	609	#N/A
			TCGA.AB.2957.03A	0	TCGA.AB.2957	609	#N/A
			TCGA.AB.2957.11A	0	TCGA.AB.2957	609	#N/A
			TCGA.AB.2872.11A	0	TCGA.AB.2872	638	#N/A
			TCGA.AB.2877.11A	0	TCGA.AB.2877	638	#N/A
			TCGA.AB.2831.11A	1	TCGA.AB.2831	640	#N/A
			TCGA.AB.2831.03B	1	TCGA.AB.2831	640	#N/A
			TCGA.AB.2831.11C	1	TCGA.AB.2831	640	#N/A
			TCGA.AB.2831.11B	1	TCGA.AB.2831	640	#N/A
			TCGA.AB.2831.03A	1	TCGA.AB.2831	640	#N/A
			TCGA.AB.2942.11A	0	TCGA.AB.2942	641	#N/A
			TCGA.AB.2899.11A	1	TCGA.AB.2899	671	#N/A
			TCGA.AB.2979.03A	0	TCGA.AB.2979	671	#N/A
			TCGA.AB.2979.11A	0	TCGA.AB.2979	671	#N/A
			TCGA.AB.2978.11A	0	TCGA.AB.2978	699	#N/A
			TCGA.AB.2978.03A	0	TCGA.AB.2978	699	#N/A
			TCGA.AB.2949.11A	0	TCGA.AB.2949	699	#N/A
			TCGA.AB.2949.03A	0	TCGA.AB.2949	699	#N/A
			TCGA.AB.2980.11A	0	TCGA.AB.2980	699	#N/A
			TCGA.AB.2883.11A	0	TCGA.AB.2883	730	#N/A
			TCGA.AB.2826.03B	1	TCGA.AB.2826	731	#N/A
			TCGA.AB.2826.11A	1	TCGA.AB.2826	731	#N/A
			TCGA.AB.2826.11C	1	TCGA.AB.2826	731	#N/A
			TCGA.AB.2826.11B	1	TCGA.AB.2826	731	#N/A
			TCGA.AB.2884.11A	1	TCGA.AB.2884	731	#N/A
			TCGA.AB.2993.03A	1	TCGA.AB.2993	761	#N/A
			TCGA.AB.2993.11A	1	TCGA.AB.2993	761	#N/A
			TCGA.AB.2971.11A	1	TCGA.AB.2971	792	#N/A
			TCGA.AB.2803.11B	1	TCGA.AB.2803	792	#N/A
			TCGA.AB.2803.11C	1	TCGA.AB.2803	792	#N/A
			TCGA.AB.2803.11A	1	TCGA.AB.2803	792	#N/A
			TCGA.AB.2803.03A	1	TCGA.AB.2803	792	#N/A
			TCGA.AB.2803.03C	1	TCGA.AB.2803	792	#N/A
			TCGA.AB.2803.03B	1	TCGA.AB.2803	792	#N/A
			TCGA.AB.2814.11D	1	TCGA.AB.2814	792	#N/A
			TCGA.AB.2814.11B	1	TCGA.AB.2814	792	#N/A
			TCGA.AB.2814.11C	1	TCGA.AB.2814	792	#N/A
			TCGA.AB.2814.11A	1	TCGA.AB.2814	792	#N/A
			TCGA.AB.2814.03C	1	TCGA.AB.2814	792	#N/A
			TCGA.AB.2814.03B	1	TCGA.AB.2814	792	#N/A
			TCGA.AB.2814.03D	1	TCGA.AB.2814	792	#N/A
			TCGA.AB.2914.11A	0	TCGA.AB.2914	792	#N/A
			TCGA.AB.2821.11B	1	TCGA.AB.2821	822	#N/A
			TCGA.AB.2821.11C	1	TCGA.AB.2821	822	#N/A
			TCGA.AB.2821.11A	1	TCGA.AB.2821	822	#N/A
			TCGA.AB.2821.03C	1	TCGA.AB.2821	822	#N/A
			TCGA.AB.2821.03B	1	TCGA.AB.2821	822	#N/A
			TCGA.AB.2815.03B	1	TCGA.AB.2815	822	#N/A
			TCGA.AB.2815.11C	1	TCGA.AB.2815	822	#N/A
			TCGA.AB.2815.11B	1	TCGA.AB.2815	822	#N/A
			TCGA.AB.2815.11A	1	TCGA.AB.2815	822	#N/A
			TCGA.AB.2815.03C	1	TCGA.AB.2815	822	#N/A
			TCGA.AB.3008.11A	1	TCGA.AB.3008	822	#N/A
			TCGA.AB.2966.11A	1	TCGA.AB.2966	854	#N/A
			TCGA.AB.2916.11A	0	TCGA.AB.2916	882	#N/A
			TCGA.AB.2976.11A	1	TCGA.AB.2976	915	#N/A
			TCGA.AB.2892.11A	0	TCGA.AB.2892	943	#N/A
			TCGA.AB.2806.03B	1	TCGA.AB.2806	945	#N/A
			TCGA.AB.2806.11A	1	TCGA.AB.2806	945	#N/A
			TCGA.AB.2806.11B	1	TCGA.AB.2806	945	#N/A
			TCGA.AB.2822.11D	1	TCGA.AB.2822	973	#N/A
			TCGA.AB.2822.11A	1	TCGA.AB.2822	973	#N/A
			TCGA.AB.2822.11B	1	TCGA.AB.2822	973	#N/A
			TCGA.AB.2822.03D	1	TCGA.AB.2822	973	#N/A
			TCGA.AB.2822.03B	1	TCGA.AB.2822	973	#N/A
			TCGA.AB.2822.03C	1	TCGA.AB.2822	973	#N/A
			TCGA.AB.2967.11A	0	TCGA.AB.2967	1035	#N/A
			TCGA.AB.2967.03A	0	TCGA.AB.2967	1035	#N/A
			TCGA.AB.2969.03A	0	TCGA.AB.2969	1127	#N/A
			TCGA.AB.2969.11A	0	TCGA.AB.2969	1127	#N/A
			TCGA.AB.2984.11A	0	TCGA.AB.2984	1157	#N/A
			TCGA.AB.2911.11A	0	TCGA.AB.2911	1186	#N/A
			TCGA.AB.2917.11A	0	TCGA.AB.2917	1216	#N/A
			TCGA.AB.2913.11A	0	TCGA.AB.2913	1216	#N/A
			TCGA.AB.2876.11A	0	TCGA.AB.2876	1219	#N/A
			TCGA.AB.3000.11A	0	TCGA.AB.3000	1249	#N/A
			TCGA.AB.2964.11A	0	TCGA.AB.2964	1277	#N/A
			TCGA.AB.2964.03A	0	TCGA.AB.2964	1277	#N/A
			TCGA.AB.2841.03C	1	TCGA.AB.2841	1401	#N/A
			TCGA.AB.2841.03A	1	TCGA.AB.2841	1401	#N/A
			TCGA.AB.2841.11A	1	TCGA.AB.2841	1401	#N/A
			TCGA.AB.2841.11B	1	TCGA.AB.2841	1401	#N/A
			TCGA.AB.2841.11C	1	TCGA.AB.2841	1401	#N/A
			TCGA.AB.2846.11B	1	TCGA.AB.2846	1402	#N/A
			TCGA.AB.2846.03B	1	TCGA.AB.2846	1402	#N/A
			TCGA.AB.2846.03C	1	TCGA.AB.2846	1402	#N/A
			TCGA.AB.2846.11A	1	TCGA.AB.2846	1402	#N/A
			TCGA.AB.2846.11D	1	TCGA.AB.2846	1402	#N/A
			TCGA.AB.2862.11A	0	TCGA.AB.2862	1430	#N/A
			TCGA.AB.2862.11C	0	TCGA.AB.2862	1430	#N/A
			TCGA.AB.2862.11B	0	TCGA.AB.2862	1430	#N/A
			TCGA.AB.2862.03B	0	TCGA.AB.2862	1430	#N/A
			TCGA.AB.2862.03C	0	TCGA.AB.2862	1430	#N/A
			TCGA.AB.3002.11A	1	TCGA.AB.3002	1431	#N/A
			TCGA.AB.2954.03A	0	TCGA.AB.2954	1492	#N/A
			TCGA.AB.2954.11A	0	TCGA.AB.2954	1492	#N/A
			TCGA.AB.2995.11A	0	TCGA.AB.2995	1551	#N/A
			TCGA.AB.3001.11A	0	TCGA.AB.3001	1581	#N/A
			TCGA.AB.2996.11A	0	TCGA.AB.2996	1581	#N/A
			TCGA.AB.3007.11A	0	TCGA.AB.3007	1581	#N/A
			TCGA.AB.2905.11A	0	TCGA.AB.2905	1611	#N/A
			TCGA.AB.2905.03A	0	TCGA.AB.2905	1611	#N/A
			TCGA.AB.2963.11A	1	TCGA.AB.2963	1642	#N/A
			TCGA.AB.2835.11A	0	TCGA.AB.2835	1673	#N/A
			TCGA.AB.2835.11C	0	TCGA.AB.2835	1673	#N/A
			TCGA.AB.2835.11B	0	TCGA.AB.2835	1673	#N/A
			TCGA.AB.2835.03B	0	TCGA.AB.2835	1673	#N/A
			TCGA.AB.2835.03C	0	TCGA.AB.2835	1673	#N/A
			TCGA.AB.2992.11A	1	TCGA.AB.2992	1706	#N/A
			TCGA.AB.2999.03A	0	TCGA.AB.2999	1735	#N/A
			TCGA.AB.2999.11A	0	TCGA.AB.2999	1735	#N/A
			TCGA.AB.2994.11A	0	TCGA.AB.2994	1798	#N/A
			TCGA.AB.2991.11A	0	TCGA.AB.2991	1826	#N/A
			TCGA.AB.3011.11A	0	TCGA.AB.3011	1885	#N/A
			TCGA.AB.3012.11A	0	TCGA.AB.3012	1887	#N/A
			TCGA.AB.3005.03A	0	TCGA.AB.3005	2100	#N/A
			TCGA.AB.3005.11A	0	TCGA.AB.3005	2100	#N/A
			TCGA.AB.2849.03C	0	TCGA.AB.2849	2220	#N/A
			TCGA.AB.2849.03B	0	TCGA.AB.2849	2220	#N/A
			TCGA.AB.2849.11A	0	TCGA.AB.2849	2220	#N/A
			TCGA.AB.2849.11B	0	TCGA.AB.2849	2220	#N/A
			TCGA.AB.2849.11C	0	TCGA.AB.2849	2220	#N/A
			TCGA.AB.2828.03B	0	TCGA.AB.2828	2284	#N/A
			TCGA.AB.2828.11C	0	TCGA.AB.2828	2284	#N/A
			TCGA.AB.2828.11A	0	TCGA.AB.2828	2284	#N/A
			TCGA.AB.2828.03C	0	TCGA.AB.2828	2284	#N/A
			TCGA.AB.2828.11B	0	TCGA.AB.2828	2284	#N/A
			TCGA.AB.2819.11B	0	TCGA.AB.2819	2496	#N/A
			TCGA.AB.2819.11C	0	TCGA.AB.2819	2496	#N/A
			TCGA.AB.2819.03B	0	TCGA.AB.2819	2496	#N/A
			TCGA.AB.2819.03C	0	TCGA.AB.2819	2496	#N/A
			TCGA.AB.2819.11A	0	TCGA.AB.2819	2496	#N/A
			TCGA.AB.2804.11A	0	TCGA.AB.2804	2557	#N/A
			TCGA.AB.2804.11C	0	TCGA.AB.2804	2557	#N/A
			TCGA.AB.2804.11B	0	TCGA.AB.2804	2557	#N/A
			TCGA.AB.2804.03B	0	TCGA.AB.2804	2557	#N/A
			TCGA.AB.2804.03C	0	TCGA.AB.2804	2557	#N/A
			TCGA.AB.2804.03A	0	TCGA.AB.2804	2557	#N/A
			TCGA.AB.2808.11A	0	TCGA.AB.2808	2861	#N/A
			TCGA.AB.2808.11C	0	TCGA.AB.2808	2861	#N/A
			TCGA.AB.2808.11B	0	TCGA.AB.2808	2861	#N/A
			TCGA.AB.2808.11D	0	TCGA.AB.2808	2861	#N/A
			TCGA.AB.2808.03B	0	TCGA.AB.2808	2861	#N/A
			TCGA.AB.2808.03C	0	TCGA.AB.2808	2861	#N/A
			TCGA.AB.2808.03D	0	TCGA.AB.2808	2861	#N/A

## Sheet: OS-year
							Table SIII Grouping of leukemia patients based on genes related to anoikis
Sample	OS	_PATIENT	OS.time	group							sample	cluster1	cluster2			sample	age	gender		female=1	male=2
TCGA.AB.2919.03A	0	TCGA.AB.2919	0.167	cluster1		总	132				TCGA.AB.2919.03A	1	0			TCGA.AB.2919.03A	25	1
TCGA.AB.2970.03A	1	TCGA.AB.2970	0.836	cluster1		cluster1	69				TCGA.AB.2970.03A	1	0			TCGA.AB.2970.03A	25	1
TCGA.AB.2979.03B	0	TCGA.AB.2979	1.838	cluster1		cluster2	63				TCGA.AB.2979.03B	1	0			TCGA.AB.2979.03B	25	1
TCGA.AB.3008.03A	1	TCGA.AB.3008	2.252	cluster1							TCGA.AB.3008.03A	1	0			TCGA.AB.3008.03A	25	1
TCGA.AB.2863.03A	1	TCGA.AB.2863	0.085	cluster1							TCGA.AB.2863.03A	1	0			TCGA.AB.2863.03A	25	1
TCGA.AB.2936.03A	0	TCGA.AB.2936	0.162	cluster1							TCGA.AB.2936.03A	1	0			TCGA.AB.2936.03A	25	1
TCGA.AB.2885.03A	1	TCGA.AB.2885	0.586	cluster1							TCGA.AB.2885.03A	1	0			TCGA.AB.2885.03A	72	1
TCGA.AB.2897.03A	0	TCGA.AB.2897	0.666	cluster1							TCGA.AB.2897.03A	1	0			TCGA.AB.2897.03A	72	1
TCGA.AB.2938.03A	1	TCGA.AB.2938	0.833	cluster1							TCGA.AB.2938.03A	1	0			TCGA.AB.2938.03A	72	1
TCGA.AB.2983.03A	1	TCGA.AB.2983	0.918	cluster1							TCGA.AB.2983.03A	1	0			TCGA.AB.2983.03A	72	1
TCGA.AB.2898.03A	0	TCGA.AB.2898	1.077	cluster1							TCGA.AB.2898.03A	1	0			TCGA.AB.2898.03A	72	1
TCGA.AB.2839.03A	1	TCGA.AB.2839	1.332	cluster1							TCGA.AB.2839.03A	1	0			TCGA.AB.2839.03A	72	1
TCGA.AB.2872.03A	0	TCGA.AB.2872	1.748	cluster1							TCGA.AB.2872.03A	1	0			TCGA.AB.2872.03A	30	1
TCGA.AB.2877.03A	0	TCGA.AB.2877	1.748	cluster1							TCGA.AB.2877.03A	1	0			TCGA.AB.2877.03A	30	1
TCGA.AB.2814.03A	1	TCGA.AB.2814	2.17	cluster1							TCGA.AB.2814.03A	1	0			TCGA.AB.2814.03A	30	1
TCGA.AB.3000.03A	0	TCGA.AB.3000	3.422	cluster1							TCGA.AB.3000.03A	1	0			TCGA.AB.3000.03A	33	2
TCGA.AB.3002.03A	1	TCGA.AB.3002	3.921	cluster1							TCGA.AB.3002.03A	1	0			TCGA.AB.3002.03A	33	2
TCGA.AB.3001.03A	0	TCGA.AB.3001	4.332	cluster1							TCGA.AB.3001.03A	1	0			TCGA.AB.3001.03A	33	2
TCGA.AB.2991.03A	0	TCGA.AB.2991	5.003	cluster1							TCGA.AB.2991.03A	1	0			TCGA.AB.2991.03A	33	2
TCGA.AB.2849.03A	0	TCGA.AB.2849	6.082	cluster1							TCGA.AB.2849.03A	1	0			TCGA.AB.2849.03A	33	2
TCGA.AB.2966.03A	1	TCGA.AB.2966	2.34	cluster1							TCGA.AB.2966.03A	1	0			TCGA.AB.2966.03A	61	1
TCGA.AB.2806.03A	1	TCGA.AB.2806	2.589	cluster1							TCGA.AB.2806.03A	1	0			TCGA.AB.2806.03A	61	1
TCGA.AB.2840.03A	1	TCGA.AB.2840	0.077	cluster1							TCGA.AB.2840.03A	1	0			TCGA.AB.2840.03A	61	1
TCGA.AB.2928.03A	1	TCGA.AB.2928	0.162	cluster1							TCGA.AB.2928.03A	1	0			TCGA.AB.2928.03A	61	1
TCGA.AB.2844.03A	1	TCGA.AB.2844	0.334	cluster1							TCGA.AB.2844.03A	1	0			TCGA.AB.2844.03A	61	1
TCGA.AB.2982.03B	0	TCGA.AB.2982	0.411	cluster1							TCGA.AB.2982.03B	1	0			TCGA.AB.2982.03B	61	1
TCGA.AB.2886.03A	0	TCGA.AB.2886	0.496	cluster1							TCGA.AB.2886.03A	1	0			TCGA.AB.2886.03A	66	1
TCGA.AB.2875.03A	0	TCGA.AB.2875	0.581	cluster1							TCGA.AB.2875.03A	1	0			TCGA.AB.2875.03A	66	1
TCGA.AB.2937.03A	1	TCGA.AB.2937	0.589	cluster1							TCGA.AB.2937.03A	1	0			TCGA.AB.2937.03A	66	1
TCGA.AB.2834.03A	1	TCGA.AB.2834	0.671	cluster1							TCGA.AB.2834.03A	1	0			TCGA.AB.2834.03A	66	1
TCGA.AB.2912.03A	1	TCGA.AB.2912	0.751	cluster1							TCGA.AB.2912.03A	1	0			TCGA.AB.2912.03A	66	1
TCGA.AB.2830.03A	1	TCGA.AB.2830	0.753	cluster1							TCGA.AB.2830.03A	1	0			TCGA.AB.2830.03A	66	1
TCGA.AB.2857.03A	1	TCGA.AB.2857	0.838	cluster1							TCGA.AB.2857.03A	1	0			TCGA.AB.2857.03A	51	2
TCGA.AB.2878.03A	1	TCGA.AB.2878	1	cluster1							TCGA.AB.2878.03A	1	0			TCGA.AB.2878.03A	51	2
TCGA.AB.2939.03A	0	TCGA.AB.2939	1.247	cluster1							TCGA.AB.2939.03A	1	0			TCGA.AB.2939.03A	57	1
TCGA.AB.3009.03A	1	TCGA.AB.3009	1.581	cluster1							TCGA.AB.3009.03A	1	0			TCGA.AB.3009.03A	57	1
TCGA.AB.2883.03A	0	TCGA.AB.2883	2	cluster1							TCGA.AB.2883.03A	1	0			TCGA.AB.2883.03A	57	1
TCGA.AB.2821.03A	1	TCGA.AB.2821	2.252	cluster1							TCGA.AB.2821.03A	1	0			TCGA.AB.2821.03A	57	1
TCGA.AB.2822.03A	1	TCGA.AB.2822	2.666	cluster1							TCGA.AB.2822.03A	1	0			TCGA.AB.2822.03A	57	1
TCGA.AB.2984.03A	0	TCGA.AB.2984	3.17	cluster1							TCGA.AB.2984.03A	1	0			TCGA.AB.2984.03A	57	1
TCGA.AB.2913.03A	0	TCGA.AB.2913	3.332	cluster1							TCGA.AB.2913.03A	1	0			TCGA.AB.2913.03A	33	1
TCGA.AB.3007.03A	0	TCGA.AB.3007	4.332	cluster1							TCGA.AB.3007.03A	1	0			TCGA.AB.3007.03A	33	1
TCGA.AB.3012.03A	0	TCGA.AB.3012	5.17	cluster1							TCGA.AB.3012.03A	1	0			TCGA.AB.3012.03A	33	1
TCGA.AB.2819.03A	0	TCGA.AB.2819	6.838	cluster1							TCGA.AB.2819.03A	1	0			TCGA.AB.2819.03A	33	1
TCGA.AB.2808.03A	0	TCGA.AB.2808	7.838	cluster1							TCGA.AB.2808.03A	1	0			TCGA.AB.2808.03A	33	1
TCGA.AB.2871.03A	0	TCGA.AB.2871	0.419	cluster1							TCGA.AB.2871.03A	1	0			TCGA.AB.2871.03A	33	1
TCGA.AB.2867.03A	1	TCGA.AB.2867	0.504	cluster1							TCGA.AB.2867.03A	1	0			TCGA.AB.2867.03A	76	2
TCGA.AB.2843.03A	1	TCGA.AB.2843	0.589	cluster1							TCGA.AB.2843.03A	1	0			TCGA.AB.2843.03A	76	2
TCGA.AB.2817.03A	1	TCGA.AB.2817	0.748	cluster1							TCGA.AB.2817.03A	1	0			TCGA.AB.2817.03A	76	2
TCGA.AB.2845.03B	1	TCGA.AB.2845	0.833	cluster1							TCGA.AB.2845.03B	1	0			TCGA.AB.2845.03B	76	2
TCGA.AB.2959.03A	1	TCGA.AB.2959	1.34	cluster1							TCGA.AB.2959.03A	1	0			TCGA.AB.2959.03A	76	2
TCGA.AB.2955.03A	1	TCGA.AB.2955	1.34	cluster1							TCGA.AB.2955.03A	1	0			TCGA.AB.2955.03A	76	2
TCGA.AB.2858.03A	1	TCGA.AB.2858	1.581	cluster1							TCGA.AB.2858.03A	1	0			TCGA.AB.2858.03A	47	1
TCGA.AB.2847.03A	1	TCGA.AB.2847	1.666	cluster1							TCGA.AB.2847.03A	1	0			TCGA.AB.2847.03A	47	1
TCGA.AB.2899.03A	1	TCGA.AB.2899	1.838	cluster1							TCGA.AB.2899.03A	1	0			TCGA.AB.2899.03A	55	2
TCGA.AB.2980.03A	0	TCGA.AB.2980	1.915	cluster1							TCGA.AB.2980.03A	1	0			TCGA.AB.2980.03A	55	2
TCGA.AB.2914.03A	0	TCGA.AB.2914	2.17	cluster1							TCGA.AB.2914.03A	1	0			TCGA.AB.2914.03A	33	2
TCGA.AB.2862.03A	0	TCGA.AB.2862	3.918	cluster1							TCGA.AB.2862.03A	1	0			TCGA.AB.2862.03A	33	2
TCGA.AB.2908.03A	1	TCGA.AB.2908	0.085	cluster1							TCGA.AB.2908.03A	1	0			TCGA.AB.2908.03A	33	2
TCGA.AB.2990.03B	0	TCGA.AB.2990	1.252	cluster1							TCGA.AB.2990.03B	1	0			TCGA.AB.2990.03B	33	2
TCGA.AB.2949.03B	0	TCGA.AB.2949	1.915	cluster1							TCGA.AB.2949.03B	1	0			TCGA.AB.2949.03B	33	2
TCGA.AB.2995.03A	0	TCGA.AB.2995	4.249	cluster1							TCGA.AB.2995.03A	1	0			TCGA.AB.2995.03A	33	2
TCGA.AB.2950.03A	0	TCGA.AB.2950	0.838	cluster1							TCGA.AB.2950.03A	1	0			TCGA.AB.2950.03A	41	2
TCGA.AB.2920.03B	1	TCGA.AB.2920	1.003	cluster1							TCGA.AB.2920.03B	1	0			TCGA.AB.2920.03B	41	2
TCGA.AB.3011.03A	0	TCGA.AB.3011	5.164	cluster1							TCGA.AB.3011.03A	1	0			TCGA.AB.3011.03A	51	2
TCGA.AB.2874.03A	0	TCGA.AB.2874	1.085	cluster1							TCGA.AB.2874.03A	1	0			TCGA.AB.2874.03A	51	2
TCGA.AB.2880.03A	1	TCGA.AB.2880	1.162	cluster1							TCGA.AB.2880.03A	1	0			TCGA.AB.2880.03A	51	2
TCGA.AB.2876.03A	0	TCGA.AB.2876	3.34	cluster1							TCGA.AB.2876.03A	1	0			TCGA.AB.2876.03A	51	2
TCGA.AB.2999.03B	0	TCGA.AB.2999	4.753	cluster1							TCGA.AB.2999.03B	1	0			TCGA.AB.2999.03B	51	2
TCGA.AB.2998.03A	1	TCGA.AB.2998	0.085	cluster2							TCGA.AB.2998.03A	0	1			TCGA.AB.2998.03A	51	2
TCGA.AB.2811.03B	1	TCGA.AB.2811	0.666	cluster2							TCGA.AB.2811.03B	0	1			TCGA.AB.2811.03B	51	2
TCGA.AB.2892.03A	0	TCGA.AB.2892	2.584	cluster2							TCGA.AB.2892.03A	0	1			TCGA.AB.2892.03A	35	2
TCGA.AB.2992.03A	1	TCGA.AB.2992	4.674	cluster2							TCGA.AB.2992.03A	0	1			TCGA.AB.2992.03A	35	2
TCGA.AB.2828.03A	0	TCGA.AB.2828	6.258	cluster2							TCGA.AB.2828.03A	0	1			TCGA.AB.2828.03A	35	2
TCGA.AB.2977.03B	1	TCGA.AB.2977	0.085	cluster2							TCGA.AB.2977.03B	0	1			TCGA.AB.2977.03B	35	2
TCGA.AB.2927.03A	1	TCGA.AB.2927	0.247	cluster2							TCGA.AB.2927.03A	0	1			TCGA.AB.2927.03A	35	2
TCGA.AB.2986.03A	1	TCGA.AB.2986	0.581	cluster2							TCGA.AB.2986.03A	0	1			TCGA.AB.2986.03A	35	2
TCGA.AB.2851.03A	1	TCGA.AB.2851	0.663	cluster2							TCGA.AB.2851.03A	0	1			TCGA.AB.2851.03A	63	2
TCGA.AB.2859.03A	1	TCGA.AB.2859	0.833	cluster2							TCGA.AB.2859.03A	0	1			TCGA.AB.2859.03A	63	2
TCGA.AB.2981.03B	0	TCGA.AB.2981	1.334	cluster2							TCGA.AB.2981.03B	0	1			TCGA.AB.2981.03B	63	2
TCGA.AB.2815.03A	1	TCGA.AB.2815	2.252	cluster2							TCGA.AB.2815.03A	0	1			TCGA.AB.2815.03A	63	2
TCGA.AB.2916.03A	0	TCGA.AB.2916	2.416	cluster2							TCGA.AB.2916.03A	0	1			TCGA.AB.2916.03A	63	2
TCGA.AB.2901.03A	0	TCGA.AB.2901	0.162	cluster2							TCGA.AB.2901.03A	0	1			TCGA.AB.2901.03A	63	2
TCGA.AB.2865.03A	1	TCGA.AB.2865	0.167	cluster2							TCGA.AB.2865.03A	0	1			TCGA.AB.2865.03A	63	2
TCGA.AB.2825.03A	1	TCGA.AB.2825	0.581	cluster2							TCGA.AB.2825.03A	0	1			TCGA.AB.2825.03A	63	2
TCGA.AB.2889.03A	0	TCGA.AB.2889	0.833	cluster2							TCGA.AB.2889.03A	0	1			TCGA.AB.2889.03A	63	2
TCGA.AB.2812.03A	1	TCGA.AB.2812	1.003	cluster2							TCGA.AB.2812.03A	0	1			TCGA.AB.2812.03A	51	1
TCGA.AB.2973.03A	1	TCGA.AB.2973	1.668	cluster2							TCGA.AB.2973.03A	0	1			TCGA.AB.2973.03A	51	1
TCGA.AB.2976.03A	1	TCGA.AB.2976	2.507	cluster2							TCGA.AB.2976.03A	0	1			TCGA.AB.2976.03A	51	1
TCGA.AB.2934.03A	0	TCGA.AB.2934	0.077	cluster2							TCGA.AB.2934.03A	0	1			TCGA.AB.2934.03A	51	1
TCGA.AB.2988.03B	1	TCGA.AB.2988	0.082	cluster2							TCGA.AB.2988.03B	0	1			TCGA.AB.2988.03B	51	1
TCGA.AB.2813.03A	1	TCGA.AB.2813	0.085	cluster2							TCGA.AB.2813.03A	0	1			TCGA.AB.2813.03A	51	1
TCGA.AB.2935.03A	1	TCGA.AB.2935	0.167	cluster2							TCGA.AB.2935.03A	0	1			TCGA.AB.2935.03A	50	2
TCGA.AB.2924.03A	0	TCGA.AB.2924	0.247	cluster2							TCGA.AB.2924.03A	0	1			TCGA.AB.2924.03A	50	2
TCGA.AB.2870.03A	1	TCGA.AB.2870	0.419	cluster2							TCGA.AB.2870.03A	0	1			TCGA.AB.2870.03A	50	2
TCGA.AB.2956.03A	1	TCGA.AB.2956	0.501	cluster2							TCGA.AB.2956.03A	0	1			TCGA.AB.2956.03A	50	2
TCGA.AB.2900.03A	1	TCGA.AB.2900	0.504	cluster2							TCGA.AB.2900.03A	0	1			TCGA.AB.2900.03A	50	2
TCGA.AB.2965.03A	1	TCGA.AB.2965	0.918	cluster2							TCGA.AB.2965.03A	0	1			TCGA.AB.2965.03A	50	2
TCGA.AB.2881.03A	0	TCGA.AB.2881	1.077	cluster2							TCGA.AB.2881.03A	0	1			TCGA.AB.2881.03A	50	2
TCGA.AB.2805.03A	1	TCGA.AB.2805	1.581	cluster2							TCGA.AB.2805.03A	0	1			TCGA.AB.2805.03A	50	2
TCGA.AB.2971.03A	1	TCGA.AB.2971	2.17	cluster2							TCGA.AB.2971.03A	0	1			TCGA.AB.2971.03A	31	1
TCGA.AB.2841.03B	1	TCGA.AB.2841	3.838	cluster2							TCGA.AB.2841.03B	0	1			TCGA.AB.2841.03B	31	1
TCGA.AB.2952.03B	1	TCGA.AB.2952	0.085	cluster2							TCGA.AB.2952.03B	0	1			TCGA.AB.2952.03B	31	1
TCGA.AB.2933.03A	1	TCGA.AB.2933	0.334	cluster2							TCGA.AB.2933.03A	0	1			TCGA.AB.2933.03A	31	1
TCGA.AB.2929.03A	1	TCGA.AB.2929	0.337	cluster2							TCGA.AB.2929.03A	0	1			TCGA.AB.2929.03A	31	1
TCGA.AB.2856.03A	1	TCGA.AB.2856	0.411	cluster2							TCGA.AB.2856.03A	0	1			TCGA.AB.2856.03A	31	1
TCGA.AB.2866.03A	1	TCGA.AB.2866	0.419	cluster2							TCGA.AB.2866.03A	0	1			TCGA.AB.2866.03A	31	1
TCGA.AB.2893.03A	1	TCGA.AB.2893	0.581	cluster2							TCGA.AB.2893.03A	0	1			TCGA.AB.2893.03A	31	1
TCGA.AB.2896.03B	1	TCGA.AB.2896	0.586	cluster2							TCGA.AB.2896.03B	0	1			TCGA.AB.2896.03B	45	2
TCGA.AB.2925.03A	1	TCGA.AB.2925	0.666	cluster2							TCGA.AB.2925.03A	0	1			TCGA.AB.2925.03A	45	2
TCGA.AB.2818.03A	1	TCGA.AB.2818	0.83	cluster2							TCGA.AB.2818.03A	0	1			TCGA.AB.2818.03A	29	1
TCGA.AB.2884.03A	1	TCGA.AB.2884	2.003	cluster2							TCGA.AB.2884.03A	0	1			TCGA.AB.2884.03A	29	1
TCGA.AB.2917.03A	0	TCGA.AB.2917	3.332	cluster2							TCGA.AB.2917.03A	0	1			TCGA.AB.2917.03A	29	1
TCGA.AB.2846.03A	1	TCGA.AB.2846	3.841	cluster2							TCGA.AB.2846.03A	0	1			TCGA.AB.2846.03A	66	1
TCGA.AB.2996.03A	0	TCGA.AB.2996	4.332	cluster2							TCGA.AB.2996.03A	0	1			TCGA.AB.2996.03A	66	1
TCGA.AB.2963.03A	1	TCGA.AB.2963	4.499	cluster2							TCGA.AB.2963.03A	0	1			TCGA.AB.2963.03A	66	1
TCGA.AB.2835.03A	0	TCGA.AB.2835	4.584	cluster2							TCGA.AB.2835.03A	0	1			TCGA.AB.2835.03A	66	1
TCGA.AB.2873.03A	0	TCGA.AB.2873	0.748	cluster2							TCGA.AB.2873.03A	0	1			TCGA.AB.2873.03A	66	1
TCGA.AB.2942.03A	0	TCGA.AB.2942	1.756	cluster2							TCGA.AB.2942.03A	0	1			TCGA.AB.2942.03A	66	1
TCGA.AB.2911.03A	0	TCGA.AB.2911	3.249	cluster2							TCGA.AB.2911.03A	0	1			TCGA.AB.2911.03A	68	1
TCGA.AB.2994.03A	0	TCGA.AB.2994	4.926	cluster2							TCGA.AB.2994.03A	0	1			TCGA.AB.2994.03A	68	1
TCGA.AB.2869.03A	0	TCGA.AB.2869	0.666	cluster2							TCGA.AB.2869.03A	0	1			TCGA.AB.2869.03A	57	1
TCGA.AB.2810.03A	1	TCGA.AB.2810	0.085	cluster2							TCGA.AB.2810.03A	0	1			TCGA.AB.2810.03A	57	1
TCGA.AB.2853.03A	1	TCGA.AB.2853	0.244	cluster2							TCGA.AB.2853.03A	0	1			TCGA.AB.2853.03A	50	2
TCGA.AB.2895.03A	1	TCGA.AB.2895	0.419	cluster2							TCGA.AB.2895.03A	0	1			TCGA.AB.2895.03A	50	2
TCGA.AB.2894.03A	1	TCGA.AB.2894	0.496	cluster2							TCGA.AB.2894.03A	0	1			TCGA.AB.2894.03A	50	2
TCGA.AB.2987.03A	1	TCGA.AB.2987	0.504	cluster2							TCGA.AB.2987.03A	0	1			TCGA.AB.2987.03A	50	2
TCGA.AB.2888.03B	0	TCGA.AB.2888	0.915	cluster2							TCGA.AB.2888.03B	0	1			TCGA.AB.2888.03B	50	2
TCGA.AB.2882.03A	1	TCGA.AB.2882	1	cluster2							TCGA.AB.2882.03A	0	1			TCGA.AB.2882.03A	50	2
TCGA.AB.2836.03A	1	TCGA.AB.2836	1.419	cluster2							TCGA.AB.2836.03A	0	1			TCGA.AB.2836.03A	30	2
TCGA.AB.2948.03A	1	TCGA.AB.2948	1.589	cluster2							TCGA.AB.2948.03A	0	1			TCGA.AB.2948.03A	30	2
TCGA.AB.2826.03A	1	TCGA.AB.2826	2.003	cluster2							TCGA.AB.2826.03A	0	1			TCGA.AB.2826.03A	30	2

## Sheet: phenotype
Table SIII. Grouping of leukemia patients based on genes related to anoikis.
	sample	age_at_initial_pathologic_diagnosis	gender.demographic	sample	age	sex	submitter_id.samples	acute_myeloid_leukemia_calgb_cytogenetics_risk_category	atra_exposure	batch_number	bcr	submitter_id	cumulative_agent_total_dose	cytogenetic_abnormality_other	cytogenetic_analysis_performed_ind	day_of_dcc_upload	days_to_initial_pathologic_diagnosis	disease_detection_molecular_analysis_method_type	file_uuid	fish_evaluation_performed_ind	fluorescence_in_situ_hybrid_cytogenetics_metaphase_nucleus_result_count	fluorescence_in_situ_hybridization_abnormal_result_indicator	germline_testing_performed	history_of_neoadjuvant_treatment	hydroxyurea_administration_prior_registration_clinical_study_indicator	hydroxyurea_agent_administered_day_count	informed_consent_verified	lab_procedure_abnormal_lymphocyte_result_percent_value	lab_procedure_blast_cell_outcome_percentage_value	lab_procedure_bone_marrow_band_cell_result_percent_value	lab_procedure_bone_marrow_basophil_result_percent_value	lab_procedure_bone_marrow_blast_cell_outcome_percent_value	lab_procedure_bone_marrow_cellularity_outcome_percent_value	lab_procedure_bone_marrow_lab_eosinophil_result_percent_value	lab_procedure_bone_marrow_lymphocyte_outcome_percent_value	lab_procedure_bone_marrow_metamyelocyte_result_value	lab_procedure_bone_marrow_myelocyte_result_percent_value	lab_procedure_bone_marrow_neutrophil_result_percent_value	lab_procedure_bone_marrow_prolymphocyte_result_percent_value	lab_procedure_bone_marrow_promonocyte_count_result_percent_value	lab_procedure_bone_marrow_promyelocyte_result_percent_value	lab_procedure_hematocrit_outcome_percent_value	lab_procedure_hemoglobin_result_specified_value	lab_procedure_leukocyte_result_unspecified_value	lab_procedure_monocyte_result_percent_value	leukemia_french_american_british_morphology_code	leukemia_specimen_cell_source_type	molecular_analysis_abnormal_result_indicator	month_of_dcc_upload
	TCGA.AB.2919.03A	25	female	TCGA.AB.2919.03A	25	female	TCGA-AB-2812-03A	Intermediate/Normal	NO	25.17.0	Washington University	TCGA-AB-2812	4000		YES	9	0		670E0D3D-2E09-4F8F-91B9-F566D8A20D87	YES	20	NO	NO	Yes	YES	3	YES	0	53	0	0	87	100	0	10	0	0	1	0	2	0		11	34	0	M2	Bone marrow aspirate		12
	TCGA.AB.2970.03A	25	female	TCGA.AB.2970.03A	25	female	TCGA-AB-2812-03B	Intermediate/Normal	NO	25.17.0	Washington University	TCGA-AB-2812	4000		YES	9	0		670E0D3D-2E09-4F8F-91B9-F566D8A20D87	YES	20	NO	NO	Yes	YES	3	YES	0	53	0	0	87	100	0	10	0	0	1	0	2	0		11	34	0	M2	Bone marrow aspirate		12
	TCGA.AB.2979.03B	25	female	TCGA.AB.2979.03B	25	female	TCGA-AB-2812-03C	Intermediate/Normal	NO	25.17.0	Washington University	TCGA-AB-2812	4000		YES	9	0		670E0D3D-2E09-4F8F-91B9-F566D8A20D87	YES	20	NO	NO	Yes	YES	3	YES	0	53	0	0	87	100	0	10	0	0	1	0	2	0		11	34	0	M2	Bone marrow aspirate		12
	TCGA.AB.3008.03A	25	female	TCGA.AB.3008.03A	25	female	TCGA-AB-2812-11A	Intermediate/Normal	NO	25.17.0	Washington University	TCGA-AB-2812	4000		YES	9	0		670E0D3D-2E09-4F8F-91B9-F566D8A20D87	YES	20	NO	NO	Yes	YES	3	YES	0	53	0	0	87	100	0	10	0	0	1	0	2	0		11	34	0	M2	Bone marrow aspirate		12
	TCGA.AB.2863.03A	25	female	TCGA.AB.2863.03A	25	female	TCGA-AB-2812-11B	Intermediate/Normal	NO	25.17.0	Washington University	TCGA-AB-2812	4000		YES	9	0		670E0D3D-2E09-4F8F-91B9-F566D8A20D87	YES	20	NO	NO	Yes	YES	3	YES	0	53	0	0	87	100	0	10	0	0	1	0	2	0		11	34	0	M2	Bone marrow aspirate		12
	TCGA.AB.2936.03A	25	female	TCGA.AB.2936.03A	25	female	TCGA-AB-2812-11C	Intermediate/Normal	NO	25.17.0	Washington University	TCGA-AB-2812	4000		YES	9	0		670E0D3D-2E09-4F8F-91B9-F566D8A20D87	YES	20	NO	NO	Yes	YES	3	YES	0	53	0	0	87	100	0	10	0	0	1	0	2	0		11	34	0	M2	Bone marrow aspirate		12
	TCGA.AB.2885.03A	72	female	TCGA.AB.2885.03A	72	female	TCGA-AB-2850-03A	Intermediate/Normal	NO	25.17.0	Washington University	TCGA-AB-2850			YES	9	0		4429D764-90F5-4899-A0D9-D5AB57A79F81	NO			NO	No	NO		YES	7	45	0	0	0	70	1	79	0	0	13	0	0	0		11	3	0	M2	Bone marrow aspirate		12
	TCGA.AB.2897.03A	72	female	TCGA.AB.2897.03A	72	female	TCGA-AB-2850-03B	Intermediate/Normal	NO	25.17.0	Washington University	TCGA-AB-2850			YES	9	0		4429D764-90F5-4899-A0D9-D5AB57A79F81	NO			NO	No	NO		YES	7	45	0	0	0	70	1	79	0	0	13	0	0	0		11	3	0	M2	Bone marrow aspirate		12
	TCGA.AB.2938.03A	72	female	TCGA.AB.2938.03A	72	female	TCGA-AB-2850-03C	Intermediate/Normal	NO	25.17.0	Washington University	TCGA-AB-2850			YES	9	0		4429D764-90F5-4899-A0D9-D5AB57A79F81	NO			NO	No	NO		YES	7	45	0	0	0	70	1	79	0	0	13	0	0	0		11	3	0	M2	Bone marrow aspirate		12
	TCGA.AB.2983.03A	72	female	TCGA.AB.2983.03A	72	female	TCGA-AB-2850-11A	Intermediate/Normal	NO	25.17.0	Washington University	TCGA-AB-2850			YES	9	0		4429D764-90F5-4899-A0D9-D5AB57A79F81	NO			NO	No	NO		YES	7	45	0	0	0	70	1	79	0	0	13	0	0	0		11	3	0	M2	Bone marrow aspirate		12
	TCGA.AB.2898.03A	72	female	TCGA.AB.2898.03A	72	female	TCGA-AB-2850-11B	Intermediate/Normal	NO	25.17.0	Washington University	TCGA-AB-2850			YES	9	0		4429D764-90F5-4899-A0D9-D5AB57A79F81	NO			NO	No	NO		YES	7	45	0	0	0	70	1	79	0	0	13	0	0	0		11	3	0	M2	Bone marrow aspirate		12
	TCGA.AB.2839.03A	72	female	TCGA.AB.2839.03A	72	female	TCGA-AB-2850-11C	Intermediate/Normal	NO	25.17.0	Washington University	TCGA-AB-2850			YES	9	0		4429D764-90F5-4899-A0D9-D5AB57A79F81	NO			NO	No	NO		YES	7	45	0	0	0	70	1	79	0	0	13	0	0	0		11	3	0	M2	Bone marrow aspirate		12
	TCGA.AB.2872.03A	30	female	TCGA.AB.2872.03A	30	female	TCGA-AB-2979-03A	Intermediate/Normal	NO	25.17.0	Washington University	TCGA-AB-2979		No	YES	9	0	RT-PCR	906E9F6C-DBCE-43EA-B42C-2A172F81564B	YES	20	NO	YES	No	NO		YES	0	86	0	0	88		0	6	0	0	6	0	0	0		10	23	0	M1	Bone marrow aspirate	NO	12
	TCGA.AB.2877.03A	30	female	TCGA.AB.2877.03A	30	female	TCGA-AB-2979-03B	Intermediate/Normal	NO	25.17.0	Washington University	TCGA-AB-2979		No	YES	9	0	RT-PCR	906E9F6C-DBCE-43EA-B42C-2A172F81564B	YES	20	NO	YES	No	NO		YES	0	86	0	0	88		0	6	0	0	6	0	0	0		10	23	0	M1	Bone marrow aspirate	NO	12
	TCGA.AB.2814.03A	30	female	TCGA.AB.2814.03A	30	female	TCGA-AB-2979-11A	Intermediate/Normal	NO	25.17.0	Washington University	TCGA-AB-2979		No	YES	9	0	RT-PCR	906E9F6C-DBCE-43EA-B42C-2A172F81564B	YES	20	NO	YES	No	NO		YES	0	86	0	0	88		0	6	0	0	6	0	0	0		10	23	0	M1	Bone marrow aspirate	NO	12
	TCGA.AB.3000.03A	33	male	TCGA.AB.3000.03A	33	male	TCGA-AB-2834-03A	Intermediate/Normal	NO	25.17.0	Washington University	TCGA-AB-2834			YES	9	0		0ED93064-B3D5-4281-BED1-6C890FB35BF9	YES	20	YES	NO	No	NO		YES	0	71	5	0	14	90	3	10	0	1	25	0	0	5		10	26	37	M4	Bone marrow aspirate		12
	TCGA.AB.3002.03A	33	male	TCGA.AB.3002.03A	33	male	TCGA-AB-2834-03B	Intermediate/Normal	NO	25.17.0	Washington University	TCGA-AB-2834			YES	9	0		0ED93064-B3D5-4281-BED1-6C890FB35BF9	YES	20	YES	NO	No	NO		YES	0	71	5	0	14	90	3	10	0	1	25	0	0	5		10	26	37	M4	Bone marrow aspirate		12
	TCGA.AB.3001.03A	33	male	TCGA.AB.3001.03A	33	male	TCGA-AB-2834-11A	Intermediate/Normal	NO	25.17.0	Washington University	TCGA-AB-2834			YES	9	0		0ED93064-B3D5-4281-BED1-6C890FB35BF9	YES	20	YES	NO	No	NO		YES	0	71	5	0	14	90	3	10	0	1	25	0	0	5		10	26	37	M4	Bone marrow aspirate		12
	TCGA.AB.2991.03A	33	male	TCGA.AB.2991.03A	33	male	TCGA-AB-2834-11B	Intermediate/Normal	NO	25.17.0	Washington University	TCGA-AB-2834			YES	9	0		0ED93064-B3D5-4281-BED1-6C890FB35BF9	YES	20	YES	NO	No	NO		YES	0	71	5	0	14	90	3	10	0	1	25	0	0	5		10	26	37	M4	Bone marrow aspirate		12
	TCGA.AB.2849.03A	33	male	TCGA.AB.2849.03A	33	male	TCGA-AB-2834-11C	Intermediate/Normal	NO	25.17.0	Washington University	TCGA-AB-2834			YES	9	0		0ED93064-B3D5-4281-BED1-6C890FB35BF9	YES	20	YES	NO	No	NO		YES	0	71	5	0	14	90	3	10	0	1	25	0	0	5		10	26	37	M4	Bone marrow aspirate		12
	TCGA.AB.2966.03A	61	female	TCGA.AB.2966.03A	61	female	TCGA-AB-2803-03A	Favorable	NO	25.17.0	Washington University	TCGA-AB-2803	0	t(15;17)	YES	9	0	RT-PCR	7A6B16BF-78D8-45C2-A7BB-184FAEE4919B	YES	25	YES	YES	No	NO	0	YES	0	44	0	0	0	90	0	91	0	0	9	0	0	0		10	1	0	M3	Bone marrow aspirate	YES	12
	TCGA.AB.2806.03A	61	female	TCGA.AB.2806.03A	61	female	TCGA-AB-2803-03B	Favorable	NO	25.17.0	Washington University	TCGA-AB-2803	0	t(15;17)	YES	9	0	RT-PCR	7A6B16BF-78D8-45C2-A7BB-184FAEE4919B	YES	25	YES	YES	No	NO	0	YES	0	44	0	0	0	90	0	91	0	0	9	0	0	0		10	1	0	M3	Bone marrow aspirate	YES	12
	TCGA.AB.2840.03A	61	female	TCGA.AB.2840.03A	61	female	TCGA-AB-2803-03C	Favorable	NO	25.17.0	Washington University	TCGA-AB-2803	0	t(15;17)	YES	9	0	RT-PCR	7A6B16BF-78D8-45C2-A7BB-184FAEE4919B	YES	25	YES	YES	No	NO	0	YES	0	44	0	0	0	90	0	91	0	0	9	0	0	0		10	1	0	M3	Bone marrow aspirate	YES	12
	TCGA.AB.2928.03A	61	female	TCGA.AB.2928.03A	61	female	TCGA-AB-2803-11A	Favorable	NO	25.17.0	Washington University	TCGA-AB-2803	0	t(15;17)	YES	9	0	RT-PCR	7A6B16BF-78D8-45C2-A7BB-184FAEE4919B	YES	25	YES	YES	No	NO	0	YES	0	44	0	0	0	90	0	91	0	0	9	0	0	0		10	1	0	M3	Bone marrow aspirate	YES	12
	TCGA.AB.2844.03A	61	female	TCGA.AB.2844.03A	61	female	TCGA-AB-2803-11B	Favorable	NO	25.17.0	Washington University	TCGA-AB-2803	0	t(15;17)	YES	9	0	RT-PCR	7A6B16BF-78D8-45C2-A7BB-184FAEE4919B	YES	25	YES	YES	No	NO	0	YES	0	44	0	0	0	90	0	91	0	0	9	0	0	0		10	1	0	M3	Bone marrow aspirate	YES	12
	TCGA.AB.2982.03B	61	female	TCGA.AB.2982.03B	61	female	TCGA-AB-2803-11C	Favorable	NO	25.17.0	Washington University	TCGA-AB-2803	0	t(15;17)	YES	9	0	RT-PCR	7A6B16BF-78D8-45C2-A7BB-184FAEE4919B	YES	25	YES	YES	No	NO	0	YES	0	44	0	0	0	90	0	91	0	0	9	0	0	0		10	1	0	M3	Bone marrow aspirate	YES	12
	TCGA.AB.2886.03A	66	female	TCGA.AB.2886.03A	66	female	TCGA-AB-2851-03A	Intermediate/Normal	NO	25.17.0	Washington University	TCGA-AB-2851			YES	9	0		38C5E3A9-F53F-426D-9B5F-F85E61EC6D02	YES	20	NO	NO	No	NO		YES	12	32	3	1	11	70	0	16	1	0	10	0	0	0		12	79	46	M5	Bone marrow aspirate		12
	TCGA.AB.2875.03A	66	female	TCGA.AB.2875.03A	66	female	TCGA-AB-2851-03B	Intermediate/Normal	NO	25.17.0	Washington University	TCGA-AB-2851			YES	9	0		38C5E3A9-F53F-426D-9B5F-F85E61EC6D02	YES	20	NO	NO	No	NO		YES	12	32	3	1	11	70	0	16	1	0	10	0	0	0		12	79	46	M5	Bone marrow aspirate		12
	TCGA.AB.2937.03A	66	female	TCGA.AB.2937.03A	66	female	TCGA-AB-2851-03C	Intermediate/Normal	NO	25.17.0	Washington University	TCGA-AB-2851			YES	9	0		38C5E3A9-F53F-426D-9B5F-F85E61EC6D02	YES	20	NO	NO	No	NO		YES	12	32	3	1	11	70	0	16	1	0	10	0	0	0		12	79	46	M5	Bone marrow aspirate		12
	TCGA.AB.2834.03A	66	female	TCGA.AB.2834.03A	66	female	TCGA-AB-2851-11A	Intermediate/Normal	NO	25.17.0	Washington University	TCGA-AB-2851			YES	9	0		38C5E3A9-F53F-426D-9B5F-F85E61EC6D02	YES	20	NO	NO	No	NO		YES	12	32	3	1	11	70	0	16	1	0	10	0	0	0		12	79	46	M5	Bone marrow aspirate		12
	TCGA.AB.2912.03A	66	female	TCGA.AB.2912.03A	66	female	TCGA-AB-2851-11B	Intermediate/Normal	NO	25.17.0	Washington University	TCGA-AB-2851			YES	9	0		38C5E3A9-F53F-426D-9B5F-F85E61EC6D02	YES	20	NO	NO	No	NO		YES	12	32	3	1	11	70	0	16	1	0	10	0	0	0		12	79	46	M5	Bone marrow aspirate		12
	TCGA.AB.2830.03A	66	female	TCGA.AB.2830.03A	66	female	TCGA-AB-2851-11C	Intermediate/Normal	NO	25.17.0	Washington University	TCGA-AB-2851			YES	9	0		38C5E3A9-F53F-426D-9B5F-F85E61EC6D02	YES	20	NO	NO	No	NO		YES	12	32	3	1	11	70	0	16	1	0	10	0	0	0		12	79	46	M5	Bone marrow aspirate		12
	TCGA.AB.2857.03A	51	male	TCGA.AB.2857.03A	51	male	TCGA-AB-2871-03A	Intermediate/Normal	NO	25.17.0	Washington University	TCGA-AB-2871	0		YES	9	0	RT-PCR	0AD5A549-3140-4CC2-BBDF-4242319958C7	NO	20		YES	No	NO	0	YES	5	62	0	0	10	45	0	71	0	0	10	4	0	0		10	2	0	M1	Bone marrow aspirate	NO	12
	TCGA.AB.2878.03A	51	male	TCGA.AB.2878.03A	51	male	TCGA-AB-2871-11A	Intermediate/Normal	NO	25.17.0	Washington University	TCGA-AB-2871	0		YES	9	0	RT-PCR	0AD5A549-3140-4CC2-BBDF-4242319958C7	NO	20		YES	No	NO	0	YES	5	62	0	0	10	45	0	71	0	0	10	4	0	0		10	2	0	M1	Bone marrow aspirate	NO	12
	TCGA.AB.2939.03A	57	female	TCGA.AB.2939.03A	57	female	TCGA-AB-2816-03A	Intermediate/Normal	NO	25.17.0	Washington University	TCGA-AB-2816	11000		YES	9	0		18DBD405-39E0-47AA-92A4-E5E54D709179	NO	20		NO	Yes	YES	3	YES	10	90	0	0	84	80	0	3	0	0	0	0	0	0		10	88	3	M4	Bone marrow aspirate		12
	TCGA.AB.3009.03A	57	female	TCGA.AB.3009.03A	57	female	TCGA-AB-2816-03B	Intermediate/Normal	NO	25.17.0	Washington University	TCGA-AB-2816	11000		YES	9	0		18DBD405-39E0-47AA-92A4-E5E54D709179	NO	20		NO	Yes	YES	3	YES	10	90	0	0	84	80	0	3	0	0	0	0	0	0		10	88	3	M4	Bone marrow aspirate		12
	TCGA.AB.2883.03A	57	female	TCGA.AB.2883.03A	57	female	TCGA-AB-2816-03C	Intermediate/Normal	NO	25.17.0	Washington University	TCGA-AB-2816	11000		YES	9	0		18DBD405-39E0-47AA-92A4-E5E54D709179	NO	20		NO	Yes	YES	3	YES	10	90	0	0	84	80	0	3	0	0	0	0	0	0		10	88	3	M4	Bone marrow aspirate		12
	TCGA.AB.2821.03A	57	female	TCGA.AB.2821.03A	57	female	TCGA-AB-2816-11A	Intermediate/Normal	NO	25.17.0	Washington University	TCGA-AB-2816	11000		YES	9	0		18DBD405-39E0-47AA-92A4-E5E54D709179	NO	20		NO	Yes	YES	3	YES	10	90	0	0	84	80	0	3	0	0	0	0	0	0		10	88	3	M4	Bone marrow aspirate		12
	TCGA.AB.2822.03A	57	female	TCGA.AB.2822.03A	57	female	TCGA-AB-2816-11B	Intermediate/Normal	NO	25.17.0	Washington University	TCGA-AB-2816	11000		YES	9	0		18DBD405-39E0-47AA-92A4-E5E54D709179	NO	20		NO	Yes	YES	3	YES	10	90	0	0	84	80	0	3	0	0	0	0	0	0		10	88	3	M4	Bone marrow aspirate		12
	TCGA.AB.2984.03A	57	female	TCGA.AB.2984.03A	57	female	TCGA-AB-2816-11C	Intermediate/Normal	NO	25.17.0	Washington University	TCGA-AB-2816	11000		YES	9	0		18DBD405-39E0-47AA-92A4-E5E54D709179	NO	20		NO	Yes	YES	3	YES	10	90	0	0	84	80	0	3	0	0	0	0	0	0		10	88	3	M4	Bone marrow aspirate		12
	TCGA.AB.2913.03A	33	female	TCGA.AB.2913.03A	33	female	TCGA-AB-2862-03A	Intermediate/Normal	NO	25.17.0	Washington University	TCGA-AB-2862			YES	9	0		1F6BAFF2-BAAC-410F-A53A-D9BB5D980474	YES	20	YES	NO	No	NO		YES	2	100	0	0	0	100	0	88	0	0	10	0	0	0		9	1	0	M3	Bone marrow aspirate		12
	TCGA.AB.3007.03A	33	female	TCGA.AB.3007.03A	33	female	TCGA-AB-2862-03B	Intermediate/Normal	NO	25.17.0	Washington University	TCGA-AB-2862			YES	9	0		1F6BAFF2-BAAC-410F-A53A-D9BB5D980474	YES	20	YES	NO	No	NO		YES	2	100	0	0	0	100	0	88	0	0	10	0	0	0		9	1	0	M3	Bone marrow aspirate		12
	TCGA.AB.3012.03A	33	female	TCGA.AB.3012.03A	33	female	TCGA-AB-2862-03C	Intermediate/Normal	NO	25.17.0	Washington University	TCGA-AB-2862			YES	9	0		1F6BAFF2-BAAC-410F-A53A-D9BB5D980474	YES	20	YES	NO	No	NO		YES	2	100	0	0	0	100	0	88	0	0	10	0	0	0		9	1	0	M3	Bone marrow aspirate		12
	TCGA.AB.2819.03A	33	female	TCGA.AB.2819.03A	33	female	TCGA-AB-2862-11A	Intermediate/Normal	NO	25.17.0	Washington University	TCGA-AB-2862			YES	9	0		1F6BAFF2-BAAC-410F-A53A-D9BB5D980474	YES	20	YES	NO	No	NO		YES	2	100	0	0	0	100	0	88	0	0	10	0	0	0		9	1	0	M3	Bone marrow aspirate		12
	TCGA.AB.2808.03A	33	female	TCGA.AB.2808.03A	33	female	TCGA-AB-2862-11B	Intermediate/Normal	NO	25.17.0	Washington University	TCGA-AB-2862			YES	9	0		1F6BAFF2-BAAC-410F-A53A-D9BB5D980474	YES	20	YES	NO	No	NO		YES	2	100	0	0	0	100	0	88	0	0	10	0	0	0		9	1	0	M3	Bone marrow aspirate		12
	TCGA.AB.2871.03A	33	female	TCGA.AB.2871.03A	33	female	TCGA-AB-2862-11C	Intermediate/Normal	NO	25.17.0	Washington University	TCGA-AB-2862			YES	9	0		1F6BAFF2-BAAC-410F-A53A-D9BB5D980474	YES	20	YES	NO	No	NO		YES	2	100	0	0	0	100	0	88	0	0	10	0	0	0		9	1	0	M3	Bone marrow aspirate		12
	TCGA.AB.2867.03A	76	male	TCGA.AB.2867.03A	76	male	TCGA-AB-2820-03A	Poor	NO	25.17.0	Washington University	TCGA-AB-2820			YES	9	0		4979F66D-A711-4DEC-8C68-360B0381A8A1	NO	17		NO	No	NO		YES	0	74	0	0	82	90	0	18	0	0	0	0	0	0		9	15	1	M0 Undifferentiated	Bone marrow aspirate		12
	TCGA.AB.2843.03A	76	male	TCGA.AB.2843.03A	76	male	TCGA-AB-2820-03B	Poor	NO	25.17.0	Washington University	TCGA-AB-2820			YES	9	0		4979F66D-A711-4DEC-8C68-360B0381A8A1	NO	17		NO	No	NO		YES	0	74	0	0	82	90	0	18	0	0	0	0	0	0		9	15	1	M0 Undifferentiated	Bone marrow aspirate		12
	TCGA.AB.2817.03A	76	male	TCGA.AB.2817.03A	76	male	TCGA-AB-2820-03C	Poor	NO	25.17.0	Washington University	TCGA-AB-2820			YES	9	0		4979F66D-A711-4DEC-8C68-360B0381A8A1	NO	17		NO	No	NO		YES	0	74	0	0	82	90	0	18	0	0	0	0	0	0		9	15	1	M0 Undifferentiated	Bone marrow aspirate		12
	TCGA.AB.2845.03B	76	male	TCGA.AB.2845.03B	76	male	TCGA-AB-2820-11A	Poor	NO	25.17.0	Washington University	TCGA-AB-2820			YES	9	0		4979F66D-A711-4DEC-8C68-360B0381A8A1	NO	17		NO	No	NO		YES	0	74	0	0	82	90	0	18	0	0	0	0	0	0		9	15	1	M0 Undifferentiated	Bone marrow aspirate		12
	TCGA.AB.2959.03A	76	male	TCGA.AB.2959.03A	76	male	TCGA-AB-2820-11B	Poor	NO	25.17.0	Washington University	TCGA-AB-2820			YES	9	0		4979F66D-A711-4DEC-8C68-360B0381A8A1	NO	17		NO	No	NO		YES	0	74	0	0	82	90	0	18	0	0	0	0	0	0		9	15	1	M0 Undifferentiated	Bone marrow aspirate		12
	TCGA.AB.2955.03A	76	male	TCGA.AB.2955.03A	76	male	TCGA-AB-2820-11C	Poor	NO	25.17.0	Washington University	TCGA-AB-2820			YES	9	0		4979F66D-A711-4DEC-8C68-360B0381A8A1	NO	17		NO	No	NO		YES	0	74	0	0	82	90	0	18	0	0	0	0	0	0		9	15	1	M0 Undifferentiated	Bone marrow aspirate		12
	TCGA.AB.2858.03A	47	female	TCGA.AB.2858.03A	47	female	TCGA-AB-2878-03A	Poor	NO	25.17.0	Washington University	TCGA-AB-2878			YES	9	0		4A4F2AE1-4D6C-4899-BD97-8E11A49A5C25	YES	20	YES	NO	No	NO		YES	0	37	0	6	0	70	5	10	0	0	70	0	0	0		9	12	9	M2	Bone marrow aspirate		12
	TCGA.AB.2847.03A	47	female	TCGA.AB.2847.03A	47	female	TCGA-AB-2878-11A	Poor	NO	25.17.0	Washington University	TCGA-AB-2878			YES	9	0		4A4F2AE1-4D6C-4899-BD97-8E11A49A5C25	YES	20	YES	NO	No	NO		YES	0	37	0	6	0	70	5	10	0	0	70	0	0	0		9	12	9	M2	Bone marrow aspirate		12
	TCGA.AB.2899.03A	55	male	TCGA.AB.2899.03A	55	male	TCGA-AB-2969-03A	Intermediate/Normal	NO	25.17.0	Washington University	TCGA-AB-2969			YES	9	0		92ECA568-31B6-41B2-844E-59D51232D134	YES	20	NO	NO	No	NO		YES	8	97	0	0	8		1	13	1	2	1	0	0	0		8	73	50	M5	Bone marrow aspirate		12
	TCGA.AB.2980.03A	55	male	TCGA.AB.2980.03A	55	male	TCGA-AB-2969-11A	Intermediate/Normal	NO	25.17.0	Washington University	TCGA-AB-2969			YES	9	0		92ECA568-31B6-41B2-844E-59D51232D134	YES	20	NO	NO	No	NO		YES	8	97	0	0	8		1	13	1	2	1	0	0	0		8	73	50	M5	Bone marrow aspirate		12
	TCGA.AB.2914.03A	33	male	TCGA.AB.2914.03A	33	male	TCGA-AB-2827-03A	Favorable	NO	25.17.0	Washington University	TCGA-AB-2827			YES	9	0		38147B69-F547-4A2B-ACE2-65E3C934CC58	YES	20	NO	NO	No	NO		YES	0	33	0	0	0	30	0	67	5	0	25	0	0	0		7	3	3	M2	Bone marrow aspirate		12
	TCGA.AB.2862.03A	33	male	TCGA.AB.2862.03A	33	male	TCGA-AB-2827-03B	Favorable	NO	25.17.0	Washington University	TCGA-AB-2827			YES	9	0		38147B69-F547-4A2B-ACE2-65E3C934CC58	YES	20	NO	NO	No	NO		YES	0	33	0	0	0	30	0	67	5	0	25	0	0	0		7	3	3	M2	Bone marrow aspirate		12
	TCGA.AB.2908.03A	33	male	TCGA.AB.2908.03A	33	male	TCGA-AB-2827-03C	Favorable	NO	25.17.0	Washington University	TCGA-AB-2827			YES	9	0		38147B69-F547-4A2B-ACE2-65E3C934CC58	YES	20	NO	NO	No	NO		YES	0	33	0	0	0	30	0	67	5	0	25	0	0	0		7	3	3	M2	Bone marrow aspirate		12
	TCGA.AB.2990.03B	33	male	TCGA.AB.2990.03B	33	male	TCGA-AB-2827-11A	Favorable	NO	25.17.0	Washington University	TCGA-AB-2827			YES	9	0		38147B69-F547-4A2B-ACE2-65E3C934CC58	YES	20	NO	NO	No	NO		YES	0	33	0	0	0	30	0	67	5	0	25	0	0	0		7	3	3	M2	Bone marrow aspirate		12
	TCGA.AB.2949.03B	33	male	TCGA.AB.2949.03B	33	male	TCGA-AB-2827-11B	Favorable	NO	25.17.0	Washington University	TCGA-AB-2827			YES	9	0		38147B69-F547-4A2B-ACE2-65E3C934CC58	YES	20	NO	NO	No	NO		YES	0	33	0	0	0	30	0	67	5	0	25	0	0	0		7	3	3	M2	Bone marrow aspirate		12
	TCGA.AB.2995.03A	33	male	TCGA.AB.2995.03A	33	male	TCGA-AB-2827-11C	Favorable	NO	25.17.0	Washington University	TCGA-AB-2827			YES	9	0		38147B69-F547-4A2B-ACE2-65E3C934CC58	YES	20	NO	NO	No	NO		YES	0	33	0	0	0	30	0	67	5	0	25	0	0	0		7	3	3	M2	Bone marrow aspirate		12
	TCGA.AB.2950.03A	41	male	TCGA.AB.2950.03A	41	male	TCGA-AB-2946-03A	Intermediate/Normal	NO	25.17.0	Washington University	TCGA-AB-2946	10000			9	0		3E95E506-08B3-48FE-80FE-2E13BF6A9BB4					Yes	YES	4	YES	2	47	0	0	62	55	3	8	0	0	3	0	0	0		9	43	22	M2	Bone marrow aspirate		12
	TCGA.AB.2920.03B	41	male	TCGA.AB.2920.03B	41	male	TCGA-AB-2946-11A	Intermediate/Normal	NO	25.17.0	Washington University	TCGA-AB-2946	10000			9	0		3E95E506-08B3-48FE-80FE-2E13BF6A9BB4					Yes	YES	4	YES	2	47	0	0	62	55	3	8	0	0	3	0	0	0		9	43	22	M2	Bone marrow aspirate		12
	TCGA.AB.3011.03A	51	male	TCGA.AB.3011.03A	51	male	TCGA-AB-2853-03A	Intermediate/Normal	NO	25.17.0	Washington University	TCGA-AB-2853			YES	9	0		392F4363-048E-4304-B521-A0C0148B4F58	NO	20		NO	No	NO		YES	0	85	0	0	85	100	0	9	2	0	1	0	0	1		12	104	2	M1	Bone marrow aspirate		12
	TCGA.AB.2874.03A	51	male	TCGA.AB.2874.03A	51	male	TCGA-AB-2853-03B	Intermediate/Normal	NO	25.17.0	Washington University	TCGA-AB-2853			YES	9	0		392F4363-048E-4304-B521-A0C0148B4F58	NO	20		NO	No	NO		YES	0	85	0	0	85	100	0	9	2	0	1	0	0	1		12	104	2	M1	Bone marrow aspirate		12
	TCGA.AB.2880.03A	51	male	TCGA.AB.2880.03A	51	male	TCGA-AB-2853-03C	Intermediate/Normal	NO	25.17.0	Washington University	TCGA-AB-2853			YES	9	0		392F4363-048E-4304-B521-A0C0148B4F58	NO	20		NO	No	NO		YES	0	85	0	0	85	100	0	9	2	0	1	0	0	1		12	104	2	M1	Bone marrow aspirate		12
	TCGA.AB.2876.03A	51	male	TCGA.AB.2876.03A	51	male	TCGA-AB-2853-03D	Intermediate/Normal	NO	25.17.0	Washington University	TCGA-AB-2853			YES	9	0		392F4363-048E-4304-B521-A0C0148B4F58	NO	20		NO	No	NO		YES	0	85	0	0	85	100	0	9	2	0	1	0	0	1		12	104	2	M1	Bone marrow aspirate		12
	TCGA.AB.2999.03B	51	male	TCGA.AB.2999.03B	51	male	TCGA-AB-2853-11A	Intermediate/Normal	NO	25.17.0	Washington University	TCGA-AB-2853			YES	9	0		392F4363-048E-4304-B521-A0C0148B4F58	NO	20		NO	No	NO		YES	0	85	0	0	85	100	0	9	2	0	1	0	0	1		12	104	2	M1	Bone marrow aspirate		12
	TCGA.AB.2998.03A	51	male	TCGA.AB.2998.03A	51	male	TCGA-AB-2853-11B	Intermediate/Normal	NO	25.17.0	Washington University	TCGA-AB-2853			YES	9	0		392F4363-048E-4304-B521-A0C0148B4F58	NO	20		NO	No	NO		YES	0	85	0	0	85	100	0	9	2	0	1	0	0	1		12	104	2	M1	Bone marrow aspirate		12
	TCGA.AB.2811.03B	51	male	TCGA.AB.2811.03B	51	male	TCGA-AB-2853-11D	Intermediate/Normal	NO	25.17.0	Washington University	TCGA-AB-2853			YES	9	0		392F4363-048E-4304-B521-A0C0148B4F58	NO	20		NO	No	NO		YES	0	85	0	0	85	100	0	9	2	0	1	0	0	1		12	104	2	M1	Bone marrow aspirate		12
	TCGA.AB.2892.03A	35	male	TCGA.AB.2892.03A	35	male	TCGA-AB-2836-03A	Intermediate/Normal	NO	25.17.0	Washington University	TCGA-AB-2836			YES	9	0		9DF68365-7B35-4E9C-A327-D28529272D44	YES	20	NO	NO	No	NO		YES	7	90	3	0	18	100	1	3	0	3	15	0	0	6		8	53	33	M4	Bone marrow aspirate		12
	TCGA.AB.2992.03A	35	male	TCGA.AB.2992.03A	35	male	TCGA-AB-2836-03B	Intermediate/Normal	NO	25.17.0	Washington University	TCGA-AB-2836			YES	9	0		9DF68365-7B35-4E9C-A327-D28529272D44	YES	20	NO	NO	No	NO		YES	7	90	3	0	18	100	1	3	0	3	15	0	0	6		8	53	33	M4	Bone marrow aspirate		12
	TCGA.AB.2828.03A	35	male	TCGA.AB.2828.03A	35	male	TCGA-AB-2836-03C	Intermediate/Normal	NO	25.17.0	Washington University	TCGA-AB-2836			YES	9	0		9DF68365-7B35-4E9C-A327-D28529272D44	YES	20	NO	NO	No	NO		YES	7	90	3	0	18	100	1	3	0	3	15	0	0	6		8	53	33	M4	Bone marrow aspirate		12
	TCGA.AB.2977.03B	35	male	TCGA.AB.2977.03B	35	male	TCGA-AB-2836-11A	Intermediate/Normal	NO	25.17.0	Washington University	TCGA-AB-2836			YES	9	0		9DF68365-7B35-4E9C-A327-D28529272D44	YES	20	NO	NO	No	NO		YES	7	90	3	0	18	100	1	3	0	3	15	0	0	6		8	53	33	M4	Bone marrow aspirate		12
	TCGA.AB.2927.03A	35	male	TCGA.AB.2927.03A	35	male	TCGA-AB-2836-11B	Intermediate/Normal	NO	25.17.0	Washington University	TCGA-AB-2836			YES	9	0		9DF68365-7B35-4E9C-A327-D28529272D44	YES	20	NO	NO	No	NO		YES	7	90	3	0	18	100	1	3	0	3	15	0	0	6		8	53	33	M4	Bone marrow aspirate		12
	TCGA.AB.2986.03A	35	male	TCGA.AB.2986.03A	35	male	TCGA-AB-2836-11C	Intermediate/Normal	NO	25.17.0	Washington University	TCGA-AB-2836			YES	9	0		9DF68365-7B35-4E9C-A327-D28529272D44	YES	20	NO	NO	No	NO		YES	7	90	3	0	18	100	1	3	0	3	15	0	0	6		8	53	33	M4	Bone marrow aspirate		12
	TCGA.AB.2851.03A	63	male	TCGA.AB.2851.03A	63	male	TCGA-AB-2995-03A	Intermediate/Normal		25.17.0	Washington University	TCGA-AB-2995	0	no	YES	9	0		02B1C724-6CA1-4E18-ADB8-BEE5C1E842A9	NO	20		NO	No	NO	0	YES	0	0	0	0	0	20	2	78	0	0	16	2	0	0		11	1	2	M2	Bone marrow aspirate		12
	TCGA.AB.2859.03A	63	male	TCGA.AB.2859.03A	63	male	TCGA-AB-2995-11A	Intermediate/Normal		25.17.0	Washington University	TCGA-AB-2995	0	no	YES	9	0		02B1C724-6CA1-4E18-ADB8-BEE5C1E842A9	NO	20		NO	No	NO	0	YES	0	0	0	0	0	20	2	78	0	0	16	2	0	0		11	1	2	M2	Bone marrow aspirate		12
	TCGA.AB.2981.03B	63	male	TCGA.AB.2981.03B	63	male	TCGA-AB-2863-03A	Poor	NO	25.17.0	Washington University	TCGA-AB-2863			YES	9	0	RT-PCR	79C3C394-1BF2-4634-9481-F04E896A1025	YES	20	NO	YES	No	NO		YES	0	81	0	0	97	95	0	2	0	0	1	0	0	0		8	46	0	M1	Bone marrow aspirate	NO	12
	TCGA.AB.2815.03A	63	male	TCGA.AB.2815.03A	63	male	TCGA-AB-2863-03B	Poor	NO	25.17.0	Washington University	TCGA-AB-2863			YES	9	0	RT-PCR	79C3C394-1BF2-4634-9481-F04E896A1025	YES	20	NO	YES	No	NO		YES	0	81	0	0	97	95	0	2	0	0	1	0	0	0		8	46	0	M1	Bone marrow aspirate	NO	12
	TCGA.AB.2916.03A	63	male	TCGA.AB.2916.03A	63	male	TCGA-AB-2863-03C	Poor	NO	25.17.0	Washington University	TCGA-AB-2863			YES	9	0	RT-PCR	79C3C394-1BF2-4634-9481-F04E896A1025	YES	20	NO	YES	No	NO		YES	0	81	0	0	97	95	0	2	0	0	1	0	0	0		8	46	0	M1	Bone marrow aspirate	NO	12
	TCGA.AB.2901.03A	63	male	TCGA.AB.2901.03A	63	male	TCGA-AB-2863-03D	Poor	NO	25.17.0	Washington University	TCGA-AB-2863			YES	9	0	RT-PCR	79C3C394-1BF2-4634-9481-F04E896A1025	YES	20	NO	YES	No	NO		YES	0	81	0	0	97	95	0	2	0	0	1	0	0	0		8	46	0	M1	Bone marrow aspirate	NO	12
	TCGA.AB.2865.03A	63	male	TCGA.AB.2865.03A	63	male	TCGA-AB-2863-11A	Poor	NO	25.17.0	Washington University	TCGA-AB-2863			YES	9	0	RT-PCR	79C3C394-1BF2-4634-9481-F04E896A1025	YES	20	NO	YES	No	NO		YES	0	81	0	0	97	95	0	2	0	0	1	0	0	0		8	46	0	M1	Bone marrow aspirate	NO	12
	TCGA.AB.2825.03A	63	male	TCGA.AB.2825.03A	63	male	TCGA-AB-2863-11B	Poor	NO	25.17.0	Washington University	TCGA-AB-2863			YES	9	0	RT-PCR	79C3C394-1BF2-4634-9481-F04E896A1025	YES	20	NO	YES	No	NO		YES	0	81	0	0	97	95	0	2	0	0	1	0	0	0		8	46	0	M1	Bone marrow aspirate	NO	12
	TCGA.AB.2889.03A	63	male	TCGA.AB.2889.03A	63	male	TCGA-AB-2863-11D	Poor	NO	25.17.0	Washington University	TCGA-AB-2863			YES	9	0	RT-PCR	79C3C394-1BF2-4634-9481-F04E896A1025	YES	20	NO	YES	No	NO		YES	0	81	0	0	97	95	0	2	0	0	1	0	0	0		8	46	0	M1	Bone marrow aspirate	NO	12
	TCGA.AB.2812.03A	51	female	TCGA.AB.2812.03A	51	female	TCGA-AB-2854-03A	Intermediate/Normal	NO	25.17.0	Washington University	TCGA-AB-2854			YES	9	0		5D05EBDD-4A4A-4B3E-891F-2A1AFCF9E0BF	NO	20		NO	No	NO		YES	0	73	2	0	2	40	3	42	0	0	6	0	0	0		11	3	45	M4	Bone marrow aspirate		12
	TCGA.AB.2973.03A	51	female	TCGA.AB.2973.03A	51	female	TCGA-AB-2854-03B	Intermediate/Normal	NO	25.17.0	Washington University	TCGA-AB-2854			YES	9	0		5D05EBDD-4A4A-4B3E-891F-2A1AFCF9E0BF	NO	20		NO	No	NO		YES	0	73	2	0	2	40	3	42	0	0	6	0	0	0		11	3	45	M4	Bone marrow aspirate		12
	TCGA.AB.2976.03A	51	female	TCGA.AB.2976.03A	51	female	TCGA-AB-2854-03C	Intermediate/Normal	NO	25.17.0	Washington University	TCGA-AB-2854			YES	9	0		5D05EBDD-4A4A-4B3E-891F-2A1AFCF9E0BF	NO	20		NO	No	NO		YES	0	73	2	0	2	40	3	42	0	0	6	0	0	0		11	3	45	M4	Bone marrow aspirate		12
	TCGA.AB.2934.03A	51	female	TCGA.AB.2934.03A	51	female	TCGA-AB-2854-11A	Intermediate/Normal	NO	25.17.0	Washington University	TCGA-AB-2854			YES	9	0		5D05EBDD-4A4A-4B3E-891F-2A1AFCF9E0BF	NO	20		NO	No	NO		YES	0	73	2	0	2	40	3	42	0	0	6	0	0	0		11	3	45	M4	Bone marrow aspirate		12
	TCGA.AB.2988.03B	51	female	TCGA.AB.2988.03B	51	female	TCGA-AB-2854-11B	Intermediate/Normal	NO	25.17.0	Washington University	TCGA-AB-2854			YES	9	0		5D05EBDD-4A4A-4B3E-891F-2A1AFCF9E0BF	NO	20		NO	No	NO		YES	0	73	2	0	2	40	3	42	0	0	6	0	0	0		11	3	45	M4	Bone marrow aspirate		12
	TCGA.AB.2813.03A	51	female	TCGA.AB.2813.03A	51	female	TCGA-AB-2854-11C	Intermediate/Normal	NO	25.17.0	Washington University	TCGA-AB-2854			YES	9	0		5D05EBDD-4A4A-4B3E-891F-2A1AFCF9E0BF	NO	20		NO	No	NO		YES	0	73	2	0	2	40	3	42	0	0	6	0	0	0		11	3	45	M4	Bone marrow aspirate		12
	TCGA.AB.2935.03A	50	male	TCGA.AB.2935.03A	50	male	TCGA-AB-2802-03A	Intermediate/Normal	NO	25.17.0	Washington University	TCGA-AB-2802	0		YES	9	0	RT-PCR	98F10632-EBB4-4325-8EDA-FB08D2B2E5FF	NO	20		YES	No	NO	0	YES	0	88	1	0	52	80	1	24	3	1	2	0	0	0		10	17	16	M4	Bone marrow aspirate	NO	12
	TCGA.AB.2924.03A	50	male	TCGA.AB.2924.03A	50	male	TCGA-AB-2802-03B	Intermediate/Normal	NO	25.17.0	Washington University	TCGA-AB-2802	0		YES	9	0	RT-PCR	98F10632-EBB4-4325-8EDA-FB08D2B2E5FF	NO	20		YES	No	NO	0	YES	0	88	1	0	52	80	1	24	3	1	2	0	0	0		10	17	16	M4	Bone marrow aspirate	NO	12
	TCGA.AB.2870.03A	50	male	TCGA.AB.2870.03A	50	male	TCGA-AB-2802-03C	Intermediate/Normal	NO	25.17.0	Washington University	TCGA-AB-2802	0		YES	9	0	RT-PCR	98F10632-EBB4-4325-8EDA-FB08D2B2E5FF	NO	20		YES	No	NO	0	YES	0	88	1	0	52	80	1	24	3	1	2	0	0	0		10	17	16	M4	Bone marrow aspirate	NO	12
	TCGA.AB.2956.03A	50	male	TCGA.AB.2956.03A	50	male	TCGA-AB-2802-03D	Intermediate/Normal	NO	25.17.0	Washington University	TCGA-AB-2802	0		YES	9	0	RT-PCR	98F10632-EBB4-4325-8EDA-FB08D2B2E5FF	NO	20		YES	No	NO	0	YES	0	88	1	0	52	80	1	24	3	1	2	0	0	0		10	17	16	M4	Bone marrow aspirate	NO	12
	TCGA.AB.2900.03A	50	male	TCGA.AB.2900.03A	50	male	TCGA-AB-2802-11A	Intermediate/Normal	NO	25.17.0	Washington University	TCGA-AB-2802	0		YES	9	0	RT-PCR	98F10632-EBB4-4325-8EDA-FB08D2B2E5FF	NO	20		YES	No	NO	0	YES	0	88	1	0	52	80	1	24	3	1	2	0	0	0		10	17	16	M4	Bone marrow aspirate	NO	12
	TCGA.AB.2965.03A	50	male	TCGA.AB.2965.03A	50	male	TCGA-AB-2802-11B	Intermediate/Normal	NO	25.17.0	Washington University	TCGA-AB-2802	0		YES	9	0	RT-PCR	98F10632-EBB4-4325-8EDA-FB08D2B2E5FF	NO	20		YES	No	NO	0	YES	0	88	1	0	52	80	1	24	3	1	2	0	0	0		10	17	16	M4	Bone marrow aspirate	NO	12
	TCGA.AB.2881.03A	50	male	TCGA.AB.2881.03A	50	male	TCGA-AB-2802-11C	Intermediate/Normal	NO	25.17.0	Washington University	TCGA-AB-2802	0		YES	9	0	RT-PCR	98F10632-EBB4-4325-8EDA-FB08D2B2E5FF	NO	20		YES	No	NO	0	YES	0	88	1	0	52	80	1	24	3	1	2	0	0	0		10	17	16	M4	Bone marrow aspirate	NO	12
	TCGA.AB.2805.03A	50	male	TCGA.AB.2805.03A	50	male	TCGA-AB-2802-11D	Intermediate/Normal	NO	25.17.0	Washington University	TCGA-AB-2802	0		YES	9	0	RT-PCR	98F10632-EBB4-4325-8EDA-FB08D2B2E5FF	NO	20		YES	No	NO	0	YES	0	88	1	0	52	80	1	24	3	1	2	0	0	0		10	17	16	M4	Bone marrow aspirate	NO	12
	TCGA.AB.2971.03A	31	female	TCGA.AB.2971.03A	31	female	TCGA-AB-2825-03A	Intermediate/Normal	NO	25.17.0	Washington University	TCGA-AB-2825	2000		YES	9	0		6825030E-1F18-4941-8623-C3AFB5D44B72	YES	20	NO	NO	Yes	YES	1	YES	0	83	0	0	6	90	0	4	0	0	0	0	14	0		6	137	76	M5	Bone marrow aspirate		12
	TCGA.AB.2841.03B	31	female	TCGA.AB.2841.03B	31	female	TCGA-AB-2825-03B	Intermediate/Normal	NO	25.17.0	Washington University	TCGA-AB-2825	2000		YES	9	0		6825030E-1F18-4941-8623-C3AFB5D44B72	YES	20	NO	NO	Yes	YES	1	YES	0	83	0	0	6	90	0	4	0	0	0	0	14	0		6	137	76	M5	Bone marrow aspirate		12
	TCGA.AB.2952.03B	31	female	TCGA.AB.2952.03B	31	female	TCGA-AB-2825-03C	Intermediate/Normal	NO	25.17.0	Washington University	TCGA-AB-2825	2000		YES	9	0		6825030E-1F18-4941-8623-C3AFB5D44B72	YES	20	NO	NO	Yes	YES	1	YES	0	83	0	0	6	90	0	4	0	0	0	0	14	0		6	137	76	M5	Bone marrow aspirate		12
	TCGA.AB.2933.03A	31	female	TCGA.AB.2933.03A	31	female	TCGA-AB-2825-03D	Intermediate/Normal	NO	25.17.0	Washington University	TCGA-AB-2825	2000		YES	9	0		6825030E-1F18-4941-8623-C3AFB5D44B72	YES	20	NO	NO	Yes	YES	1	YES	0	83	0	0	6	90	0	4	0	0	0	0	14	0		6	137	76	M5	Bone marrow aspirate		12
	TCGA.AB.2929.03A	31	female	TCGA.AB.2929.03A	31	female	TCGA-AB-2825-11A	Intermediate/Normal	NO	25.17.0	Washington University	TCGA-AB-2825	2000		YES	9	0		6825030E-1F18-4941-8623-C3AFB5D44B72	YES	20	NO	NO	Yes	YES	1	YES	0	83	0	0	6	90	0	4	0	0	0	0	14	0		6	137	76	M5	Bone marrow aspirate		12
	TCGA.AB.2856.03A	31	female	TCGA.AB.2856.03A	31	female	TCGA-AB-2825-11B	Intermediate/Normal	NO	25.17.0	Washington University	TCGA-AB-2825	2000		YES	9	0		6825030E-1F18-4941-8623-C3AFB5D44B72	YES	20	NO	NO	Yes	YES	1	YES	0	83	0	0	6	90	0	4	0	0	0	0	14	0		6	137	76	M5	Bone marrow aspirate		12
	TCGA.AB.2866.03A	31	female	TCGA.AB.2866.03A	31	female	TCGA-AB-2825-11C	Intermediate/Normal	NO	25.17.0	Washington University	TCGA-AB-2825	2000		YES	9	0		6825030E-1F18-4941-8623-C3AFB5D44B72	YES	20	NO	NO	Yes	YES	1	YES	0	83	0	0	6	90	0	4	0	0	0	0	14	0		6	137	76	M5	Bone marrow aspirate		12
	TCGA.AB.2893.03A	31	female	TCGA.AB.2893.03A	31	female	TCGA-AB-2825-11D	Intermediate/Normal	NO	25.17.0	Washington University	TCGA-AB-2825	2000		YES	9	0		6825030E-1F18-4941-8623-C3AFB5D44B72	YES	20	NO	NO	Yes	YES	1	YES	0	83	0	0	6	90	0	4	0	0	0	0	14	0		6	137	76	M5	Bone marrow aspirate		12
	TCGA.AB.2896.03B	45	male	TCGA.AB.2896.03B	45	male	TCGA-AB-2983-03A	Intermediate/Normal	NO	25.17.0	Washington University	TCGA-AB-2983	0		YES	9	0		00400B85-D6BF-4005-B524-1E98E9037A14		20		NO	No	NO	0	YES	0	0	0	0	0	30	5	53	0	0	29	0	0	0		12	2	13	M0 Undifferentiated	Bone marrow aspirate		12
	TCGA.AB.2925.03A	45	male	TCGA.AB.2925.03A	45	male	TCGA-AB-2983-11A	Intermediate/Normal	NO	25.17.0	Washington University	TCGA-AB-2983	0		YES	9	0		00400B85-D6BF-4005-B524-1E98E9037A14		20		NO	No	NO	0	YES	0	0	0	0	0	30	5	53	0	0	29	0	0	0		12	2	13	M0 Undifferentiated	Bone marrow aspirate		12
	TCGA.AB.2818.03A	29	female	TCGA.AB.2818.03A	29	female	TCGA-AB-2982-03A	Favorable	NO	25.17.0	Washington University	TCGA-AB-2982		No	YES	9	0	RT-PCR	6DAF7E69-C881-4D7F-AC13-9F35F01A4B18	YES	20	YES	YES	No	NO		YES	0	0	2	0	0	90	1	55	2	3	20	0	0	1		9	1	16	M3	Bone marrow aspirate	NO	12
	TCGA.AB.2884.03A	29	female	TCGA.AB.2884.03A	29	female	TCGA-AB-2982-03B	Favorable	NO	25.17.0	Washington University	TCGA-AB-2982		No	YES	9	0	RT-PCR	6DAF7E69-C881-4D7F-AC13-9F35F01A4B18	YES	20	YES	YES	No	NO		YES	0	0	2	0	0	90	1	55	2	3	20	0	0	1		9	1	16	M3	Bone marrow aspirate	NO	12
	TCGA.AB.2917.03A	29	female	TCGA.AB.2917.03A	29	female	TCGA-AB-2982-11A	Favorable	NO	25.17.0	Washington University	TCGA-AB-2982		No	YES	9	0	RT-PCR	6DAF7E69-C881-4D7F-AC13-9F35F01A4B18	YES	20	YES	YES	No	NO		YES	0	0	2	0	0	90	1	55	2	3	20	0	0	1		9	1	16	M3	Bone marrow aspirate	NO	12
	TCGA.AB.2846.03A	66	female	TCGA.AB.2846.03A	66	female	TCGA-AB-2837-03A	Intermediate/Normal	NO	25.17.0	Washington University	TCGA-AB-2837	3000		YES	9	0		8048E4AD-659A-4EFB-9564-08488176E107	NO	20		NO	Yes	YES	3	YES	30	90	6	1	7	90	1	0	4	3	20	0	0	6		10	112	0	M5	Bone marrow aspirate		12
	TCGA.AB.2996.03A	66	female	TCGA.AB.2996.03A	66	female	TCGA-AB-2837-03B	Intermediate/Normal	NO	25.17.0	Washington University	TCGA-AB-2837	3000		YES	9	0		8048E4AD-659A-4EFB-9564-08488176E107	NO	20		NO	Yes	YES	3	YES	30	90	6	1	7	90	1	0	4	3	20	0	0	6		10	112	0	M5	Bone marrow aspirate		12
	TCGA.AB.2963.03A	66	female	TCGA.AB.2963.03A	66	female	TCGA-AB-2837-03C	Intermediate/Normal	NO	25.17.0	Washington University	TCGA-AB-2837	3000		YES	9	0		8048E4AD-659A-4EFB-9564-08488176E107	NO	20		NO	Yes	YES	3	YES	30	90	6	1	7	90	1	0	4	3	20	0	0	6		10	112	0	M5	Bone marrow aspirate		12
	TCGA.AB.2835.03A	66	female	TCGA.AB.2835.03A	66	female	TCGA-AB-2837-11A	Intermediate/Normal	NO	25.17.0	Washington University	TCGA-AB-2837	3000		YES	9	0		8048E4AD-659A-4EFB-9564-08488176E107	NO	20		NO	Yes	YES	3	YES	30	90	6	1	7	90	1	0	4	3	20	0	0	6		10	112	0	M5	Bone marrow aspirate		12
	TCGA.AB.2873.03A	66	female	TCGA.AB.2873.03A	66	female	TCGA-AB-2837-11B	Intermediate/Normal	NO	25.17.0	Washington University	TCGA-AB-2837	3000		YES	9	0		8048E4AD-659A-4EFB-9564-08488176E107	NO	20		NO	Yes	YES	3	YES	30	90	6	1	7	90	1	0	4	3	20	0	0	6		10	112	0	M5	Bone marrow aspirate		12
	TCGA.AB.2942.03A	66	female	TCGA.AB.2942.03A	66	female	TCGA-AB-2837-11C	Intermediate/Normal	NO	25.17.0	Washington University	TCGA-AB-2837	3000		YES	9	0		8048E4AD-659A-4EFB-9564-08488176E107	NO	20		NO	Yes	YES	3	YES	30	90	6	1	7	90	1	0	4	3	20	0	0	6		10	112	0	M5	Bone marrow aspirate		12
	TCGA.AB.2911.03A	68	female	TCGA.AB.2911.03A	68	female	TCGA-AB-2998-03A	Favorable	NO	25.17.0	Washington University	TCGA-AB-2998	14000		YES	9	0	RT-PCR	A1CEA6B3-EE2E-437D-B03A-75E82FB12E25	YES	20	YES	YES	Yes	YES	4	YES	3	85	0	0	32	100	1	4	0	10	1	0	17	8		10	29	24	M3	Bone marrow aspirate	YES	12
	TCGA.AB.2994.03A	68	female	TCGA.AB.2994.03A	68	female	TCGA-AB-2998-11A	Favorable	NO	25.17.0	Washington University	TCGA-AB-2998	14000		YES	9	0	RT-PCR	A1CEA6B3-EE2E-437D-B03A-75E82FB12E25	YES	20	YES	YES	Yes	YES	4	YES	3	85	0	0	32	100	1	4	0	10	1	0	17	8		10	29	24	M3	Bone marrow aspirate	YES	12
	TCGA.AB.2869.03A	57	female	TCGA.AB.2869.03A	57	female	TCGA-AB-2993-03A	Intermediate/Normal		25.17.0	Washington University	TCGA-AB-2993	4500	no	YES	9	0		AB3B85F8-6486-40A6-9080-2E46EA89A855	YES	20	YES	NO	Yes	YES	2	YES	0	6	2	0	91	90	0	1	0	0	6	1	0	0		10	103	0	M4	Bone marrow aspirate		12
	TCGA.AB.2810.03A	57	female	TCGA.AB.2810.03A	57	female	TCGA-AB-2993-11A	Intermediate/Normal		25.17.0	Washington University	TCGA-AB-2993	4500	no	YES	9	0		AB3B85F8-6486-40A6-9080-2E46EA89A855	YES	20	YES	NO	Yes	YES	2	YES	0	6	2	0	91	90	0	1	0	0	6	1	0	0		10	103	0	M4	Bone marrow aspirate		12
	TCGA.AB.2853.03A	50	male	TCGA.AB.2853.03A	50	male	TCGA-AB-2829-03A		NO	25.17.0	Washington University	TCGA-AB-2829				9	0		E9D31C50-45AD-41BF-978F-AAD36A583E43	YES		YES	NO	No	NO		YES	0	70	8	0	0	90	0	36	0	0	34	0	0	0		9	6	22	M6	Bone marrow aspirate		12
	TCGA.AB.2895.03A	50	male	TCGA.AB.2895.03A	50	male	TCGA-AB-2829-03B		NO	25.17.0	Washington University	TCGA-AB-2829				9	0		E9D31C50-45AD-41BF-978F-AAD36A583E43	YES		YES	NO	No	NO		YES	0	70	8	0	0	90	0	36	0	0	34	0	0	0		9	6	22	M6	Bone marrow aspirate		12
	TCGA.AB.2894.03A	50	male	TCGA.AB.2894.03A	50	male	TCGA-AB-2829-03C		NO	25.17.0	Washington University	TCGA-AB-2829				9	0		E9D31C50-45AD-41BF-978F-AAD36A583E43	YES		YES	NO	No	NO		YES	0	70	8	0	0	90	0	36	0	0	34	0	0	0		9	6	22	M6	Bone marrow aspirate		12
	TCGA.AB.2987.03A	50	male	TCGA.AB.2987.03A	50	male	TCGA-AB-2829-11A		NO	25.17.0	Washington University	TCGA-AB-2829				9	0		E9D31C50-45AD-41BF-978F-AAD36A583E43	YES		YES	NO	No	NO		YES	0	70	8	0	0	90	0	36	0	0	34	0	0	0		9	6	22	M6	Bone marrow aspirate		12
	TCGA.AB.2888.03B	50	male	TCGA.AB.2888.03B	50	male	TCGA-AB-2829-11B		NO	25.17.0	Washington University	TCGA-AB-2829				9	0		E9D31C50-45AD-41BF-978F-AAD36A583E43	YES		YES	NO	No	NO		YES	0	70	8	0	0	90	0	36	0	0	34	0	0	0		9	6	22	M6	Bone marrow aspirate		12
	TCGA.AB.2882.03A	50	male	TCGA.AB.2882.03A	50	male	TCGA-AB-2829-11C		NO	25.17.0	Washington University	TCGA-AB-2829				9	0		E9D31C50-45AD-41BF-978F-AAD36A583E43	YES		YES	NO	No	NO		YES	0	70	8	0	0	90	0	36	0	0	34	0	0	0		9	6	22	M6	Bone marrow aspirate		12
	TCGA.AB.2836.03A	30	male	TCGA.AB.2836.03A	30	male	TCGA-AB-2804-03A	Intermediate/Normal	YES	25.17.0	Washington University	TCGA-AB-2804	0		YES	9	0	RT-PCR	13AF5C70-CB6B-4602-819D-FD76E2121768	YES	25	NO	YES	No	NO	0	YES	0	82	0	0	6	100	0	25	1	0	1	0	0	63		11	6	4	M3	Bone marrow aspirate	YES	12
	TCGA.AB.2948.03A	30	male	TCGA.AB.2948.03A	30	male	TCGA-AB-2804-03B	Intermediate/Normal	YES	25.17.0	Washington University	TCGA-AB-2804	0		YES	9	0	RT-PCR	13AF5C70-CB6B-4602-819D-FD76E2121768	YES	25	NO	YES	No	NO	0	YES	0	82	0	0	6	100	0	25	1	0	1	0	0	63		11	6	4	M3	Bone marrow aspirate	YES	12
	TCGA.AB.2826.03A	30	male	TCGA.AB.2826.03A	30	male	TCGA-AB-2804-03C	Intermediate/Normal	YES	25.17.0	Washington University	TCGA-AB-2804	0		YES	9	0	RT-PCR	13AF5C70-CB6B-4602-819D-FD76E2121768	YES	25	NO	YES	No	NO	0	YES	0	82	0	0	6	100	0	25	1	0	1	0	0	63		11	6	4	M3	Bone marrow aspirate	YES	12
	TCGA-AB-2804-11A	YES	white				Intermediate/Normal	30	25.17.0	Washington University	TCGA-AB-2804	0		YES	9	0	RT-PCR	13AF5C70-CB6B-4602-819D-FD76E2121768	YES	25	NO	YES	No	NO	0	YES	0	82	0	0	6	100	0	25	1	0	1	0	0	63		11	6	4	M3	Bone marrow aspirate	YES	12	No
	TCGA-AB-2804-11B	YES	white				Intermediate/Normal	30	25.17.0	Washington University	TCGA-AB-2804	0		YES	9	0	RT-PCR	13AF5C70-CB6B-4602-819D-FD76E2121768	YES	25	NO	YES	No	NO	0	YES	0	82	0	0	6	100	0	25	1	0	1	0	0	63		11	6	4	M3	Bone marrow aspirate	YES	12	No
	TCGA-AB-2804-11C	YES	white				Intermediate/Normal	30	25.17.0	Washington University	TCGA-AB-2804	0		YES	9	0	RT-PCR	13AF5C70-CB6B-4602-819D-FD76E2121768	YES	25	NO	YES	No	NO	0	YES	0	82	0	0	6	100	0	25	1	0	1	0	0	63		11	6	4	M3	Bone marrow aspirate	YES	12	No
	TCGA-AB-2817-03A	NO	white				Poor	64	25.17.0	Washington University	TCGA-AB-2817		t(9;22)	YES	9	0		E4CD97FB-5362-4315-9489-4C07DB21505B	YES	20	YES	NO	No	NO		YES	0	57	7	0	70	90	1	8	6	0	3	0	0	3		13	77	2	M2	Bone marrow aspirate		12	No
	TCGA-AB-2817-03B	NO	white				Poor	64	25.17.0	Washington University	TCGA-AB-2817		t(9;22)	YES	9	0		E4CD97FB-5362-4315-9489-4C07DB21505B	YES	20	YES	NO	No	NO		YES	0	57	7	0	70	90	1	8	6	0	3	0	0	3		13	77	2	M2	Bone marrow aspirate		12	No
	TCGA-AB-2817-03C	NO	white				Poor	64	25.17.0	Washington University	TCGA-AB-2817		t(9;22)	YES	9	0		E4CD97FB-5362-4315-9489-4C07DB21505B	YES	20	YES	NO	No	NO		YES	0	57	7	0	70	90	1	8	6	0	3	0	0	3		13	77	2	M2	Bone marrow aspirate		12	No
	TCGA-AB-2817-11A	NO	white				Poor	64	25.17.0	Washington University	TCGA-AB-2817		t(9;22)	YES	9	0		E4CD97FB-5362-4315-9489-4C07DB21505B	YES	20	YES	NO	No	NO		YES	0	57	7	0	70	90	1	8	6	0	3	0	0	3		13	77	2	M2	Bone marrow aspirate		12	No
	TCGA-AB-2817-11B	NO	white				Poor	64	25.17.0	Washington University	TCGA-AB-2817		t(9;22)	YES	9	0		E4CD97FB-5362-4315-9489-4C07DB21505B	YES	20	YES	NO	No	NO		YES	0	57	7	0	70	90	1	8	6	0	3	0	0	3		13	77	2	M2	Bone marrow aspirate		12	No
	TCGA-AB-2817-11C	NO	white				Poor	64	25.17.0	Washington University	TCGA-AB-2817		t(9;22)	YES	9	0		E4CD97FB-5362-4315-9489-4C07DB21505B	YES	20	YES	NO	No	NO		YES	0	57	7	0	70	90	1	8	6	0	3	0	0	3		13	77	2	M2	Bone marrow aspirate		12	No
	TCGA-AB-3005-03A	NO	white				Intermediate/Normal	45	25.17.0	Washington University	TCGA-AB-3005	0		YES	9	0		73C4CCB1-F387-4FAA-A96C-60FDB92C9486	YES	20	NO	NO	No	NO	0	YES	0	0	3	0	0	80	12	54	2	0	20	0	0	0		13	2	9	M5	Bone marrow aspirate		12	No
	TCGA-AB-3005-11A	NO	white				Intermediate/Normal	45	25.17.0	Washington University	TCGA-AB-3005	0		YES	9	0		73C4CCB1-F387-4FAA-A96C-60FDB92C9486	YES	20	NO	NO	No	NO	0	YES	0	0	3	0	0	80	12	54	2	0	20	0	0	0		13	2	9	M5	Bone marrow aspirate		12	No
	TCGA-AB-2860-03A	NO	white				Poor	60	25.17.0	Washington University	TCGA-AB-2860		t(4;11)	YES	9	0		06D4B7BF-D558-4544-AC30-C1A57242DFE2	NO	20		NO	No	NO		YES	14	58	0	0	0	70	2	64	0	0	18	0	0	0		9	1	2	M7	Bone marrow aspirate		12	No
	TCGA-AB-2860-03B	NO	white				Poor	60	25.17.0	Washington University	TCGA-AB-2860		t(4;11)	YES	9	0		06D4B7BF-D558-4544-AC30-C1A57242DFE2	NO	20		NO	No	NO		YES	14	58	0	0	0	70	2	64	0	0	18	0	0	0		9	1	2	M7	Bone marrow aspirate		12	No
	TCGA-AB-2860-03C	NO	white				Poor	60	25.17.0	Washington University	TCGA-AB-2860		t(4;11)	YES	9	0		06D4B7BF-D558-4544-AC30-C1A57242DFE2	NO	20		NO	No	NO		YES	14	58	0	0	0	70	2	64	0	0	18	0	0	0		9	1	2	M7	Bone marrow aspirate		12	No
	TCGA-AB-2860-11A	NO	white				Poor	60	25.17.0	Washington University	TCGA-AB-2860		t(4;11)	YES	9	0		06D4B7BF-D558-4544-AC30-C1A57242DFE2	NO	20		NO	No	NO		YES	14	58	0	0	0	70	2	64	0	0	18	0	0	0		9	1	2	M7	Bone marrow aspirate		12	No
	TCGA-AB-2860-11B	NO	white				Poor	60	25.17.0	Washington University	TCGA-AB-2860		t(4;11)	YES	9	0		06D4B7BF-D558-4544-AC30-C1A57242DFE2	NO	20		NO	No	NO		YES	14	58	0	0	0	70	2	64	0	0	18	0	0	0		9	1	2	M7	Bone marrow aspirate		12	No
	TCGA-AB-2860-11C	NO	white				Poor	60	25.17.0	Washington University	TCGA-AB-2860		t(4;11)	YES	9	0		06D4B7BF-D558-4544-AC30-C1A57242DFE2	NO	20		NO	No	NO		YES	14	58	0	0	0	70	2	64	0	0	18	0	0	0		9	1	2	M7	Bone marrow aspirate		12	No
	TCGA-AB-2973-03A	NO	white				Intermediate/Normal	68	25.17.0	Washington University	TCGA-AB-2973			YES	9	0	RT-PCR	6C5C42CF-4E90-4AFE-9634-5FEDC0DB3766	YES	20	NO	YES	No	NO		YES	3	75	1	0	10	90	0	29	0	1	16	0	10	0		8	15	30	M4	Bone marrow aspirate	NO	12	No
	TCGA-AB-2973-11A	NO	white				Intermediate/Normal	68	25.17.0	Washington University	TCGA-AB-2973			YES	9	0	RT-PCR	6C5C42CF-4E90-4AFE-9634-5FEDC0DB3766	YES	20	NO	YES	No	NO		YES	3	75	1	0	10	90	0	29	0	1	16	0	10	0		8	15	30	M4	Bone marrow aspirate	NO	12	No
	TCGA-AB-2900-03A	NO	black or african american				Intermediate/Normal	70	25.17.0	Washington University	TCGA-AB-2900	7000		YES	9	0		C98B014E-D79E-47FF-8FEB-5D6C29BC2F65	YES	20	NO	NO	Yes	YES	4	YES	0	84	3	0	49	90	8	5	0	0	3	0	14	7		10	48	11	M1	Bone marrow aspirate		12	No
	TCGA-AB-2900-11A	NO	black or african american				Intermediate/Normal	70	25.17.0	Washington University	TCGA-AB-2900	7000		YES	9	0		C98B014E-D79E-47FF-8FEB-5D6C29BC2F65	YES	20	NO	NO	Yes	YES	4	YES	0	84	3	0	49	90	8	5	0	0	3	0	14	7		10	48	11	M1	Bone marrow aspirate		12	No
	TCGA-AB-2877-03A	NO	white				Intermediate/Normal	60	25.17.0	Washington University	TCGA-AB-2877			YES	9	0		EA74CF10-8415-446D-B384-69363383E63B	YES	20	NO	NO	No	NO		YES	1	86	3	0	43	90	3	45	0	1	4	0	0	0		9	12	0	M1	Bone marrow aspirate		12	Yes
	TCGA-AB-2877-11A	NO	white				Intermediate/Normal	60	25.17.0	Washington University	TCGA-AB-2877			YES	9	0		EA74CF10-8415-446D-B384-69363383E63B	YES	20	NO	NO	No	NO		YES	1	86	3	0	43	90	3	45	0	1	4	0	0	0		9	12	0	M1	Bone marrow aspirate		12	Yes
	TCGA-AB-2875-03A	NO	white				Favorable	43	25.17.0	Washington University	TCGA-AB-2875			YES	9	0	RT-PCR	48B29775-389C-4364-AE49-2D61D67508DE	YES	20	YES	YES	No	NO		YES	0	40	3	0	39	45	0	29	0	4	21	0	0	0		11	4	4	M2	Bone marrow aspirate	YES	12	No
	TCGA-AB-2875-11A	NO	white				Favorable	43	25.17.0	Washington University	TCGA-AB-2875			YES	9	0	RT-PCR	48B29775-389C-4364-AE49-2D61D67508DE	YES	20	YES	YES	No	NO		YES	0	40	3	0	39	45	0	29	0	4	21	0	0	0		11	4	4	M2	Bone marrow aspirate	YES	12	No
	TCGA-AB-2972-03A	NO	white				Intermediate/Normal	82	25.17.0	Washington University	TCGA-AB-2972			YES	9	0	RT-PCR	3E3FD182-AF10-42D5-AFC0-80E8E7EBF90C	YES	20	NO	YES	No	NO		YES	2	53	0	0	25	70	0	42	0	2	24	0	0	0		11	1	5	M2	Bone marrow aspirate	NO	12	No
	TCGA-AB-2972-11A	NO	white				Intermediate/Normal	82	25.17.0	Washington University	TCGA-AB-2972			YES	9	0	RT-PCR	3E3FD182-AF10-42D5-AFC0-80E8E7EBF90C	YES	20	NO	YES	No	NO		YES	2	53	0	0	25	70	0	42	0	2	24	0	0	0		11	1	5	M2	Bone marrow aspirate	NO	12	No
	TCGA-AB-2898-03A	NO	white				Poor	69	25.17.0	Washington University	TCGA-AB-2898			YES	9	0		4719E65B-3941-4436-9C64-11CAF3733B0E	YES	20	NO	NO	No	NO		YES	40	42	0	0	32	90	0	22	0	0	5	0	0	0		7	10	1	M1	Bone marrow aspirate		12	No
	TCGA-AB-2898-11A	NO	white				Poor	69	25.17.0	Washington University	TCGA-AB-2898			YES	9	0		4719E65B-3941-4436-9C64-11CAF3733B0E	YES	20	NO	NO	No	NO		YES	40	42	0	0	32	90	0	22	0	0	5	0	0	0		7	10	1	M1	Bone marrow aspirate		12	No
	TCGA-AB-2913-03A	NO	white				Poor	61	25.17.0	Washington University	TCGA-AB-2913			YES	9	0		1653F1AE-AA80-48A5-84DB-86EC2793E910	YES	20	NO	NO	No	NO		YES	2	95	0	0	86		0	8	0	0	3	0	0	0		13	62	1	M0 Undifferentiated	Bone marrow aspirate		12	No
	TCGA-AB-2913-11A	NO	white				Poor	61	25.17.0	Washington University	TCGA-AB-2913			YES	9	0		1653F1AE-AA80-48A5-84DB-86EC2793E910	YES	20	NO	NO	No	NO		YES	2	95	0	0	86		0	8	0	0	3	0	0	0		13	62	1	M0 Undifferentiated	Bone marrow aspirate		12	No
	TCGA-AB-2932-03A	NO	white				Intermediate/Normal	62	25.17.0	Washington University	TCGA-AB-2932	8000		YES	9	0	RT-PCR	FE9000C5-FEE9-43A2-A46D-0D8466EFAE22	YES	20	NO	YES	Yes	YES	3	YES	0	85	0	0	22	90	0	11	0	0	5	0	3	0		7	59	59	M5	Bone marrow aspirate	YES	12	Yes
	TCGA-AB-2932-11A	NO	white				Intermediate/Normal	62	25.17.0	Washington University	TCGA-AB-2932	8000		YES	9	0	RT-PCR	FE9000C5-FEE9-43A2-A46D-0D8466EFAE22	YES	20	NO	YES	Yes	YES	3	YES	0	85	0	0	22	90	0	11	0	0	5	0	3	0		7	59	59	M5	Bone marrow aspirate	YES	12	Yes
	TCGA-AB-3006-03A		white				Intermediate/Normal	61	25.17.0	Washington University	TCGA-AB-3006	0		YES	9	0		1F476811-D977-42DC-91FF-E6B7584909A0	YES	20	NO	NO	No	NO	0	YES	15	14	21	0	14	60	2	48	0	0	20	0	0	0		14	3	2	M1	Bone marrow aspirate		12	No
	TCGA-AB-3006-11A		white				Intermediate/Normal	61	25.17.0	Washington University	TCGA-AB-3006	0		YES	9	0		1F476811-D977-42DC-91FF-E6B7584909A0	YES	20	NO	NO	No	NO	0	YES	15	14	21	0	14	60	2	48	0	0	20	0	0	0		14	3	2	M1	Bone marrow aspirate		12	No
	TCGA-AB-2858-03A	NO	white				Favorable	75	25.17.0	Washington University	TCGA-AB-2858			YES	9	0		365FD361-5905-4ECC-88E3-9162C6872069	YES	20	YES	NO	No	NO		YES	4	48	0	0	54	35	0	22	0	0	20	0	0	0		9	8	0	M2	Bone marrow aspirate		12	No
	TCGA-AB-2858-03B	NO	white				Favorable	75	25.17.0	Washington University	TCGA-AB-2858			YES	9	0		365FD361-5905-4ECC-88E3-9162C6872069	YES	20	YES	NO	No	NO		YES	4	48	0	0	54	35	0	22	0	0	20	0	0	0		9	8	0	M2	Bone marrow aspirate		12	No
	TCGA-AB-2858-03C	NO	white				Favorable	75	25.17.0	Washington University	TCGA-AB-2858			YES	9	0		365FD361-5905-4ECC-88E3-9162C6872069	YES	20	YES	NO	No	NO		YES	4	48	0	0	54	35	0	22	0	0	20	0	0	0		9	8	0	M2	Bone marrow aspirate		12	No
	TCGA-AB-2858-03D	NO	white				Favorable	75	25.17.0	Washington University	TCGA-AB-2858			YES	9	0		365FD361-5905-4ECC-88E3-9162C6872069	YES	20	YES	NO	No	NO		YES	4	48	0	0	54	35	0	22	0	0	20	0	0	0		9	8	0	M2	Bone marrow aspirate		12	No
	TCGA-AB-2858-11A	NO	white				Favorable	75	25.17.0	Washington University	TCGA-AB-2858			YES	9	0		365FD361-5905-4ECC-88E3-9162C6872069	YES	20	YES	NO	No	NO		YES	4	48	0	0	54	35	0	22	0	0	20	0	0	0		9	8	0	M2	Bone marrow aspirate		12	No
	TCGA-AB-2858-11B	NO	white				Favorable	75	25.17.0	Washington University	TCGA-AB-2858			YES	9	0		365FD361-5905-4ECC-88E3-9162C6872069	YES	20	YES	NO	No	NO		YES	4	48	0	0	54	35	0	22	0	0	20	0	0	0		9	8	0	M2	Bone marrow aspirate		12	No
	TCGA-AB-2858-11C	NO	white				Favorable	75	25.17.0	Washington University	TCGA-AB-2858			YES	9	0		365FD361-5905-4ECC-88E3-9162C6872069	YES	20	YES	NO	No	NO		YES	4	48	0	0	54	35	0	22	0	0	20	0	0	0		9	8	0	M2	Bone marrow aspirate		12	No
	TCGA-AB-2858-12A	NO	white				Favorable	75	25.17.0	Washington University	TCGA-AB-2858			YES	9	0		365FD361-5905-4ECC-88E3-9162C6872069	YES	20	YES	NO	No	NO		YES	4	48	0	0	54	35	0	22	0	0	20	0	0	0		9	8	0	M2	Bone marrow aspirate		12	No
	TCGA-AB-2986-03A	NO	white				Intermediate/Normal	31	25.17.0	Washington University	TCGA-AB-2986			YES	9	0	RT-PCR	C36C7DCA-E2BA-46F0-B628-16FB1126ED25	YES	20	NO	YES	No	NO		YES	0	63	0	0	45	95	1	33	0	0	20	0	0	0		11	13	1	M2	Bone marrow aspirate	YES	12	No
	TCGA-AB-2986-11A	NO	white				Intermediate/Normal	31	25.17.0	Washington University	TCGA-AB-2986			YES	9	0	RT-PCR	C36C7DCA-E2BA-46F0-B628-16FB1126ED25	YES	20	NO	YES	No	NO		YES	0	63	0	0	45	95	1	33	0	0	20	0	0	0		11	13	1	M2	Bone marrow aspirate	YES	12	No
	TCGA-AB-2818-03A	NO	asian				Intermediate/Normal	62	25.17.0	Washington University	TCGA-AB-2818			YES	9	0		07D4E41C-FA90-4286-9FC4-2E000AC165E3	NO	20		NO	No	NO		YES	0	46	2	0	53		0	12	0	0	21	1	0	4		11	75	7	M2	Bone marrow aspirate		12	No
	TCGA-AB-2818-03B	NO	asian				Intermediate/Normal	62	25.17.0	Washington University	TCGA-AB-2818			YES	9	0		07D4E41C-FA90-4286-9FC4-2E000AC165E3	NO	20		NO	No	NO		YES	0	46	2	0	53		0	12	0	0	21	1	0	4		11	75	7	M2	Bone marrow aspirate		12	No
	TCGA-AB-2818-03C	NO	asian				Intermediate/Normal	62	25.17.0	Washington University	TCGA-AB-2818			YES	9	0		07D4E41C-FA90-4286-9FC4-2E000AC165E3	NO	20		NO	No	NO		YES	0	46	2	0	53		0	12	0	0	21	1	0	4		11	75	7	M2	Bone marrow aspirate		12	No
	TCGA-AB-2818-11A	NO	asian				Intermediate/Normal	62	25.17.0	Washington University	TCGA-AB-2818			YES	9	0		07D4E41C-FA90-4286-9FC4-2E000AC165E3	NO	20		NO	No	NO		YES	0	46	2	0	53		0	12	0	0	21	1	0	4		11	75	7	M2	Bone marrow aspirate		12	No
	TCGA-AB-2818-11B	NO	asian				Intermediate/Normal	62	25.17.0	Washington University	TCGA-AB-2818			YES	9	0		07D4E41C-FA90-4286-9FC4-2E000AC165E3	NO	20		NO	No	NO		YES	0	46	2	0	53		0	12	0	0	21	1	0	4		11	75	7	M2	Bone marrow aspirate		12	No
	TCGA-AB-2818-11C	NO	asian				Intermediate/Normal	62	25.17.0	Washington University	TCGA-AB-2818			YES	9	0		07D4E41C-FA90-4286-9FC4-2E000AC165E3	NO	20		NO	No	NO		YES	0	46	2	0	53		0	12	0	0	21	1	0	4		11	75	7	M2	Bone marrow aspirate		12	No
	TCGA-AB-2941-03A	NO	white				Poor	73	25.17.0	Washington University	TCGA-AB-2941		t(9;22)	YES	9	0		97B1D8E5-81FC-4B23-9DDC-25CF4B09F6CC	YES	20	YES	NO	No	NO		YES	0	90	0	0	0	90	0	4	0	0	94	0	0	0		9	59	1	Not Classified	Bone marrow aspirate		12	Yes
	TCGA-AB-2941-11A	NO	white				Poor	73	25.17.0	Washington University	TCGA-AB-2941		t(9;22)	YES	9	0		97B1D8E5-81FC-4B23-9DDC-25CF4B09F6CC	YES	20	YES	NO	No	NO		YES	0	90	0	0	0	90	0	4	0	0	94	0	0	0		9	59	1	Not Classified	Bone marrow aspirate		12	Yes
	TCGA-AB-2883-03A	NO	white				Poor	60	25.17.0	Washington University	TCGA-AB-2883		21	YES	9	0	RT-PCR	78B5ADF1-5C4D-4A44-90C7-04CFFC0E0A10	YES	20	YES	YES	No	NO		YES	0	94	0	0	30	90	0	49	0	1	5	0	2	0		9	7	12	M5	Bone marrow aspirate	NO	12	No
	TCGA-AB-2883-11A	NO	white				Poor	60	25.17.0	Washington University	TCGA-AB-2883		21	YES	9	0	RT-PCR	78B5ADF1-5C4D-4A44-90C7-04CFFC0E0A10	YES	20	YES	YES	No	NO		YES	0	94	0	0	30	90	0	49	0	1	5	0	2	0		9	7	12	M5	Bone marrow aspirate	NO	12	No
	TCGA-AB-2921-03A	NO	white				Intermediate/Normal	56	25.17.0	Washington University	TCGA-AB-2921			YES	9	0	RT-PCR	2B5B2161-B988-4D80-8E21-25D421C881EE	YES	20	NO	YES	No	NO		YES	0	69	1	0	57	90	0	21	4	1	2	0	3	0		8	28	11	M4	Bone marrow aspirate	YES	12	No
	TCGA-AB-2921-11A	NO	white				Intermediate/Normal	56	25.17.0	Washington University	TCGA-AB-2921			YES	9	0	RT-PCR	2B5B2161-B988-4D80-8E21-25D421C881EE	YES	20	NO	YES	No	NO		YES	0	69	1	0	57	90	0	21	4	1	2	0	3	0		8	28	11	M4	Bone marrow aspirate	YES	12	No
	TCGA-AB-2919-03A	NO	white				Intermediate/Normal	54	25.17.0	Washington University	TCGA-AB-2919	2000		YES	9	0	RT-PCR	B4809842-F8B1-428C-9061-CABDB2F1E527	YES	20	NO	YES	Yes	YES	2	YES	0	72	0	0	90	90	0	9	0	0	1	0	0	0		9	13	0	M1	Bone marrow aspirate	YES	12	No
	TCGA-AB-2919-11A	NO	white				Intermediate/Normal	54	25.17.0	Washington University	TCGA-AB-2919	2000		YES	9	0	RT-PCR	B4809842-F8B1-428C-9061-CABDB2F1E527	YES	20	NO	YES	Yes	YES	2	YES	0	72	0	0	90	90	0	9	0	0	1	0	0	0		9	13	0	M1	Bone marrow aspirate	YES	12	No
	TCGA-AB-2963-03A	NO	white				Intermediate/Normal	56	25.17.0	Washington University	TCGA-AB-2963	0		YES	9	0		F445D7EB-A446-407C-AF1F-FEFA4FEF9DDA	NO	20		NO	No	NO	0	YES	6	90	2	0	45	90	0	5	0	2	8	0	0	8		10	31	24	M1	Bone marrow aspirate		12	No
	TCGA-AB-2963-11A	NO	white				Intermediate/Normal	56	25.17.0	Washington University	TCGA-AB-2963	0		YES	9	0		F445D7EB-A446-407C-AF1F-FEFA4FEF9DDA	NO	20		NO	No	NO	0	YES	6	90	2	0	45	90	0	5	0	2	8	0	0	8		10	31	24	M1	Bone marrow aspirate		12	No
	TCGA-AB-2821-03A	NO	white				Poor	64	25.17.0	Washington University	TCGA-AB-2821			YES	9	0		4DBB157C-01C4-4ED3-B0A6-F08CCD516A65	YES	20	YES	NO	No	NO		YES	2	61	0	0	5	20	0	74	0	0	13	0	0	0		8	1	6	M1	Bone marrow aspirate		12	No
	TCGA-AB-2821-03B	NO	white				Poor	64	25.17.0	Washington University	TCGA-AB-2821			YES	9	0		4DBB157C-01C4-4ED3-B0A6-F08CCD516A65	YES	20	YES	NO	No	NO		YES	2	61	0	0	5	20	0	74	0	0	13	0	0	0		8	1	6	M1	Bone marrow aspirate		12	No
	TCGA-AB-2821-03C	NO	white				Poor	64	25.17.0	Washington University	TCGA-AB-2821			YES	9	0		4DBB157C-01C4-4ED3-B0A6-F08CCD516A65	YES	20	YES	NO	No	NO		YES	2	61	0	0	5	20	0	74	0	0	13	0	0	0		8	1	6	M1	Bone marrow aspirate		12	No
	TCGA-AB-2821-11A	NO	white				Poor	64	25.17.0	Washington University	TCGA-AB-2821			YES	9	0		4DBB157C-01C4-4ED3-B0A6-F08CCD516A65	YES	20	YES	NO	No	NO		YES	2	61	0	0	5	20	0	74	0	0	13	0	0	0		8	1	6	M1	Bone marrow aspirate		12	No
	TCGA-AB-2821-11B	NO	white				Poor	64	25.17.0	Washington University	TCGA-AB-2821			YES	9	0		4DBB157C-01C4-4ED3-B0A6-F08CCD516A65	YES	20	YES	NO	No	NO		YES	2	61	0	0	5	20	0	74	0	0	13	0	0	0		8	1	6	M1	Bone marrow aspirate		12	No
	TCGA-AB-2821-11C	NO	white				Poor	64	25.17.0	Washington University	TCGA-AB-2821			YES	9	0		4DBB157C-01C4-4ED3-B0A6-F08CCD516A65	YES	20	YES	NO	No	NO		YES	2	61	0	0	5	20	0	74	0	0	13	0	0	0		8	1	6	M1	Bone marrow aspirate		12	No
	TCGA-AB-2992-03A	NO	white				Intermediate/Normal	32	25.17.0	Washington University	TCGA-AB-2992			YES	9	0		F573DD44-789F-49C5-B787-AC77F2B94043	YES	20	NO	NO	No	NO		YES	0	94	0	0	70	95	0	30	0	0	0	0	0	0		9	5	0	M1	Bone marrow aspirate		12	No
	TCGA-AB-2992-11A	NO	white				Intermediate/Normal	32	25.17.0	Washington University	TCGA-AB-2992			YES	9	0		F573DD44-789F-49C5-B787-AC77F2B94043	YES	20	NO	NO	No	NO		YES	0	94	0	0	70	95	0	30	0	0	0	0	0	0		9	5	0	M1	Bone marrow aspirate		12	No
	TCGA-AB-2967-03A	NO	white				Intermediate/Normal	58	25.17.0	Washington University	TCGA-AB-2967			YES	9	0		8E3A23E8-FDE3-4474-97B0-2080C3DB7E69	YES	20	NO	NO	No	NO		YES	0	58	5	0	10	90	1	17	0	5	45	0	0	0		9	20	17	M4	Bone marrow aspirate		12	No
	TCGA-AB-2967-11A	NO	white				Intermediate/Normal	58	25.17.0	Washington University	TCGA-AB-2967			YES	9	0		8E3A23E8-FDE3-4474-97B0-2080C3DB7E69	YES	20	NO	NO	No	NO		YES	0	58	5	0	10	90	1	17	0	5	45	0	0	0		9	20	17	M4	Bone marrow aspirate		12	No
	TCGA-AB-2872-03A	YES	black or african american				Favorable	42	25.17.0	Washington University	TCGA-AB-2872			YES	9	0	RT-PCR	58FB29FF-2799-4DCA-8F7C-635A75ADC295	YES	20	YES	YES	No	NO		YES	2	88	2	0	2	90	0	79	0	0	6	0	0	5		9	2	4	M3	Bone marrow aspirate	YES	12	No
	TCGA-AB-2872-11A	YES	black or african american				Favorable	42	25.17.0	Washington University	TCGA-AB-2872			YES	9	0	RT-PCR	58FB29FF-2799-4DCA-8F7C-635A75ADC295	YES	20	YES	YES	No	NO		YES	2	88	2	0	2	90	0	79	0	0	6	0	0	5		9	2	4	M3	Bone marrow aspirate	YES	12	No
	TCGA-AB-2809-03A	NO	white				Intermediate/Normal	64	25.17.0	Washington University	TCGA-AB-2809	0		YES	9	0		06A6999E-2E7B-41D7-A2A0-E1D3B1CBF00B	YES	25	NO	NO	No	NO	0	YES	0	60	0	2	0	90	0	11	0	0	69	0	0	0		10	117	18	M3	Bone marrow aspirate		12	No
	TCGA-AB-2809-03B	NO	white				Intermediate/Normal	64	25.17.0	Washington University	TCGA-AB-2809	0		YES	9	0		06A6999E-2E7B-41D7-A2A0-E1D3B1CBF00B	YES	25	NO	NO	No	NO	0	YES	0	60	0	2	0	90	0	11	0	0	69	0	0	0		10	117	18	M3	Bone marrow aspirate		12	No
	TCGA-AB-2809-03C	NO	white				Intermediate/Normal	64	25.17.0	Washington University	TCGA-AB-2809	0		YES	9	0		06A6999E-2E7B-41D7-A2A0-E1D3B1CBF00B	YES	25	NO	NO	No	NO	0	YES	0	60	0	2	0	90	0	11	0	0	69	0	0	0		10	117	18	M3	Bone marrow aspirate		12	No
	TCGA-AB-2809-03D	NO	white				Intermediate/Normal	64	25.17.0	Washington University	TCGA-AB-2809	0		YES	9	0		06A6999E-2E7B-41D7-A2A0-E1D3B1CBF00B	YES	25	NO	NO	No	NO	0	YES	0	60	0	2	0	90	0	11	0	0	69	0	0	0		10	117	18	M3	Bone marrow aspirate		12	No
	TCGA-AB-2809-11A	NO	white				Intermediate/Normal	64	25.17.0	Washington University	TCGA-AB-2809	0		YES	9	0		06A6999E-2E7B-41D7-A2A0-E1D3B1CBF00B	YES	25	NO	NO	No	NO	0	YES	0	60	0	2	0	90	0	11	0	0	69	0	0	0		10	117	18	M3	Bone marrow aspirate		12	No
	TCGA-AB-2809-11B	NO	white				Intermediate/Normal	64	25.17.0	Washington University	TCGA-AB-2809	0		YES	9	0		06A6999E-2E7B-41D7-A2A0-E1D3B1CBF00B	YES	25	NO	NO	No	NO	0	YES	0	60	0	2	0	90	0	11	0	0	69	0	0	0		10	117	18	M3	Bone marrow aspirate		12	No
	TCGA-AB-2809-11C	NO	white				Intermediate/Normal	64	25.17.0	Washington University	TCGA-AB-2809	0		YES	9	0		06A6999E-2E7B-41D7-A2A0-E1D3B1CBF00B	YES	25	NO	NO	No	NO	0	YES	0	60	0	2	0	90	0	11	0	0	69	0	0	0		10	117	18	M3	Bone marrow aspirate		12	No
	TCGA-AB-2809-11D	NO	white				Intermediate/Normal	64	25.17.0	Washington University	TCGA-AB-2809	0		YES	9	0		06A6999E-2E7B-41D7-A2A0-E1D3B1CBF00B	YES	25	NO	NO	No	NO	0	YES	0	60	0	2	0	90	0	11	0	0	69	0	0	0		10	117	18	M3	Bone marrow aspirate		12	No
	TCGA-AB-2888-03A	NO	white				Favorable	57	25.17.0	Washington University	TCGA-AB-2888			YES	9	0	RT-PCR	D86726EB-FB2F-473A-A09C-DAD79E12D674	YES		YES	YES	No	NO		YES	1	40	0	0	0	30	1	27	0	0	12	0	1	0		7	5	58	M4	Bone marrow aspirate	NO	12	No
	TCGA-AB-2888-03B	NO	white				Favorable	57	25.17.0	Washington University	TCGA-AB-2888			YES	9	0	RT-PCR	D86726EB-FB2F-473A-A09C-DAD79E12D674	YES		YES	YES	No	NO		YES	1	40	0	0	0	30	1	27	0	0	12	0	1	0		7	5	58	M4	Bone marrow aspirate	NO	12	No
	TCGA-AB-2888-11A	NO	white				Favorable	57	25.17.0	Washington University	TCGA-AB-2888			YES	9	0	RT-PCR	D86726EB-FB2F-473A-A09C-DAD79E12D674	YES		YES	YES	No	NO		YES	1	40	0	0	0	30	1	27	0	0	12	0	1	0		7	5	58	M4	Bone marrow aspirate	NO	12	No
	TCGA-AB-2906-03A	YES	white				Favorable	59	25.17.0	Washington University	TCGA-AB-2906			YES	9	0	RT-PCR	845A3485-A4E3-4EF1-81A6-55E90563495C	YES	20	YES	YES	No	NO		YES	0	79	3	0	15	90	0	51	0	0	23	0	0	0		8	1	8	M3	Bone marrow aspirate	YES	12	No
	TCGA-AB-2906-11A	YES	white				Favorable	59	25.17.0	Washington University	TCGA-AB-2906			YES	9	0	RT-PCR	845A3485-A4E3-4EF1-81A6-55E90563495C	YES	20	YES	YES	No	NO		YES	0	79	3	0	15	90	0	51	0	0	23	0	0	0		8	1	8	M3	Bone marrow aspirate	YES	12	No
	TCGA-AB-2822-03A	NO	white				Poor	65	25.17.0	Washington University	TCGA-AB-2822			YES	9	0	RT-PCR	2C25B139-0ABD-4608-880B-B30158455130	NO	20		YES	No	NO		YES	16	99	0	0	34	50	0	45	0	0	1	0	0	0		9	3	4	M0 Undifferentiated	Bone marrow aspirate	NO	12	No
	TCGA-AB-2822-03B	NO	white				Poor	65	25.17.0	Washington University	TCGA-AB-2822			YES	9	0	RT-PCR	2C25B139-0ABD-4608-880B-B30158455130	NO	20		YES	No	NO		YES	16	99	0	0	34	50	0	45	0	0	1	0	0	0		9	3	4	M0 Undifferentiated	Bone marrow aspirate	NO	12	No
	TCGA-AB-2822-03C	NO	white				Poor	65	25.17.0	Washington University	TCGA-AB-2822			YES	9	0	RT-PCR	2C25B139-0ABD-4608-880B-B30158455130	NO	20		YES	No	NO		YES	16	99	0	0	34	50	0	45	0	0	1	0	0	0		9	3	4	M0 Undifferentiated	Bone marrow aspirate	NO	12	No
	TCGA-AB-2822-03D	NO	white				Poor	65	25.17.0	Washington University	TCGA-AB-2822			YES	9	0	RT-PCR	2C25B139-0ABD-4608-880B-B30158455130	NO	20		YES	No	NO		YES	16	99	0	0	34	50	0	45	0	0	1	0	0	0		9	3	4	M0 Undifferentiated	Bone marrow aspirate	NO	12	No
	TCGA-AB-2822-11A	NO	white				Poor	65	25.17.0	Washington University	TCGA-AB-2822			YES	9	0	RT-PCR	2C25B139-0ABD-4608-880B-B30158455130	NO	20		YES	No	NO		YES	16	99	0	0	34	50	0	45	0	0	1	0	0	0		9	3	4	M0 Undifferentiated	Bone marrow aspirate	NO	12	No
	TCGA-AB-2822-11B	NO	white				Poor	65	25.17.0	Washington University	TCGA-AB-2822			YES	9	0	RT-PCR	2C25B139-0ABD-4608-880B-B30158455130	NO	20		YES	No	NO		YES	16	99	0	0	34	50	0	45	0	0	1	0	0	0		9	3	4	M0 Undifferentiated	Bone marrow aspirate	NO	12	No
	TCGA-AB-2822-11D	NO	white				Poor	65	25.17.0	Washington University	TCGA-AB-2822			YES	9	0	RT-PCR	2C25B139-0ABD-4608-880B-B30158455130	NO	20		YES	No	NO		YES	16	99	0	0	34	50	0	45	0	0	1	0	0	0		9	3	4	M0 Undifferentiated	Bone marrow aspirate	NO	12	No
	TCGA-AB-2945-03A	NO	white				Poor	65	25.17.0	Washington University	TCGA-AB-2945			YES	9	0		A3EFDAA4-7202-46CF-8CBD-6683CA86B27A	NO	20		NO	No	NO		YES	0	90	1	0	0	90	0	17	0	0	4	0	0	0		9	49	2	M4	Bone marrow aspirate		12	No
	TCGA-AB-2945-11A	NO	white				Poor	65	25.17.0	Washington University	TCGA-AB-2945			YES	9	0		A3EFDAA4-7202-46CF-8CBD-6683CA86B27A	NO	20		NO	No	NO		YES	0	90	1	0	0	90	0	17	0	0	4	0	0	0		9	49	2	M4	Bone marrow aspirate		12	No
	TCGA-AB-3011-03A	NO	white				Intermediate/Normal	21	25.17.0	Washington University	TCGA-AB-3011			YES	9	0		5ED90467-9DC3-47FA-ADB9-75B702075657	YES	20	NO	NO	No	NO		YES	0	91	1	0	83	95	0	14	0	0	1	0	0	0		8	8	1	M1	Bone marrow aspirate		12	No
	TCGA-AB-3011-11A	NO	white				Intermediate/Normal	21	25.17.0	Washington University	TCGA-AB-3011			YES	9	0		5ED90467-9DC3-47FA-ADB9-75B702075657	YES	20	NO	NO	No	NO		YES	0	91	1	0	83	95	0	14	0	0	1	0	0	0		8	8	1	M1	Bone marrow aspirate		12	No
	TCGA-AB-2988-03A	NO	white				Intermediate/Normal	67	25.17.0	Washington University	TCGA-AB-2988			YES	9	0	RT-PCR	BB23DAED-B2C4-45BC-A512-E39071912FE5	YES	20	NO	YES	No	NO		YES	0	76	3	0	49	15	1	20	1	2	13	0	1	0		13	46	10	M1	Bone marrow aspirate	YES	12	No
	TCGA-AB-2988-03B	NO	white				Intermediate/Normal	67	25.17.0	Washington University	TCGA-AB-2988			YES	9	0	RT-PCR	BB23DAED-B2C4-45BC-A512-E39071912FE5	YES	20	NO	YES	No	NO		YES	0	76	3	0	49	15	1	20	1	2	13	0	1	0		13	46	10	M1	Bone marrow aspirate	YES	12	No
	TCGA-AB-2988-03C	NO	white				Intermediate/Normal	67	25.17.0	Washington University	TCGA-AB-2988			YES	9	0	RT-PCR	BB23DAED-B2C4-45BC-A512-E39071912FE5	YES	20	NO	YES	No	NO		YES	0	76	3	0	49	15	1	20	1	2	13	0	1	0		13	46	10	M1	Bone marrow aspirate	YES	12	No
	TCGA-AB-2988-11A	NO	white				Intermediate/Normal	67	25.17.0	Washington University	TCGA-AB-2988			YES	9	0	RT-PCR	BB23DAED-B2C4-45BC-A512-E39071912FE5	YES	20	NO	YES	No	NO		YES	0	76	3	0	49	15	1	20	1	2	13	0	1	0		13	46	10	M1	Bone marrow aspirate	YES	12	No
	TCGA-AB-2916-03A	NO	white				Intermediate/Normal	48	25.17.0	Washington University	TCGA-AB-2916			YES	9	0	RT-PCR	344B6351-5A18-49CF-B058-E0B97AEDA63A	NO	20		YES	No	NO		YES	0	51	4	0	5	80	0	15	0	5	39	0	0	0		9	12	32	M4	Bone marrow aspirate	NO	12	No
	TCGA-AB-2916-11A	NO	white				Intermediate/Normal	48	25.17.0	Washington University	TCGA-AB-2916			YES	9	0	RT-PCR	344B6351-5A18-49CF-B058-E0B97AEDA63A	NO	20		YES	No	NO		YES	0	51	4	0	5	80	0	15	0	5	39	0	0	0		9	12	32	M4	Bone marrow aspirate	NO	12	No
	TCGA-AB-2966-03A	NO	white				Intermediate/Normal	57	25.17.0	Washington University	TCGA-AB-2966	500		YES	9	0	RT-PCR	8681CE75-2AD1-4634-A313-2BA02D6E9BDC	YES	20	NO	YES	Yes	YES	1	YES	1	43	0	0	35	80	0	64	0	0	0	0	0	0		9	3	0	M2	Bone marrow aspirate	NO	12	No
	TCGA-AB-2966-11A	NO	white				Intermediate/Normal	57	25.17.0	Washington University	TCGA-AB-2966	500		YES	9	0	RT-PCR	8681CE75-2AD1-4634-A313-2BA02D6E9BDC	YES	20	NO	YES	Yes	YES	1	YES	1	43	0	0	35	80	0	64	0	0	0	0	0	0		9	3	0	M2	Bone marrow aspirate	NO	12	No
	TCGA-AB-2806-03A	NO	white				Favorable	46	25.17.0	Washington University	TCGA-AB-2806	4000		YES	9	0		7F0A3B76-36D9-48BA-B5D7-7A45952A2E05	NO	20		NO	Yes	YES	3	YES	0	90	0	0	81		0	6	0	0	0	0	0	13		9	29	0	M1	Bone marrow aspirate		12	No
	TCGA-AB-2806-03B	NO	white				Favorable	46	25.17.0	Washington University	TCGA-AB-2806	4000		YES	9	0		7F0A3B76-36D9-48BA-B5D7-7A45952A2E05	NO	20		NO	Yes	YES	3	YES	0	90	0	0	81		0	6	0	0	0	0	0	13		9	29	0	M1	Bone marrow aspirate		12	No
	TCGA-AB-2806-11A	NO	white				Favorable	46	25.17.0	Washington University	TCGA-AB-2806	4000		YES	9	0		7F0A3B76-36D9-48BA-B5D7-7A45952A2E05	NO	20		NO	Yes	YES	3	YES	0	90	0	0	81		0	6	0	0	0	0	0	13		9	29	0	M1	Bone marrow aspirate		12	No
	TCGA-AB-2806-11B	NO	white				Favorable	46	25.17.0	Washington University	TCGA-AB-2806	4000		YES	9	0		7F0A3B76-36D9-48BA-B5D7-7A45952A2E05	NO	20		NO	Yes	YES	3	YES	0	90	0	0	81		0	6	0	0	0	0	0	13		9	29	0	M1	Bone marrow aspirate		12	No
	TCGA-AB-3009-03A	NO	not reported				Intermediate/Normal	23	25.17.0	Washington University	TCGA-AB-3009			YES	9	0		EBF213DA-6220-49D0-A811-C62F56C4B6F4	NO	20			No	NO		YES	0	51	0	0	63		0	18	0	0	0	0	1	18		12	27	0	M4	Bone marrow aspirate		12	No
	TCGA-AB-3009-11A	NO	not reported				Intermediate/Normal	23	25.17.0	Washington University	TCGA-AB-3009			YES	9	0		EBF213DA-6220-49D0-A811-C62F56C4B6F4	NO	20			No	NO		YES	0	51	0	0	63		0	18	0	0	0	0	1	18		12	27	0	M4	Bone marrow aspirate		12	No
	TCGA-AB-2859-03A	NO	black or african american				Intermediate/Normal	40	25.17.0	Washington University	TCGA-AB-2859			YES	9	0		273C4633-76CA-4D31-8E41-CF50EC56DC90	NO	13		NO	No	NO		YES	2	47	0	1	23	90	1	38	0	0	33	0	0	0		10	8	2	M2	Bone marrow aspirate		12	No
	TCGA-AB-2859-03B	NO	black or african american				Intermediate/Normal	40	25.17.0	Washington University	TCGA-AB-2859			YES	9	0		273C4633-76CA-4D31-8E41-CF50EC56DC90	NO	13		NO	No	NO		YES	2	47	0	1	23	90	1	38	0	0	33	0	0	0		10	8	2	M2	Bone marrow aspirate		12	No
	TCGA-AB-2859-11A	NO	black or african american				Intermediate/Normal	40	25.17.0	Washington University	TCGA-AB-2859			YES	9	0		273C4633-76CA-4D31-8E41-CF50EC56DC90	NO	13		NO	No	NO		YES	2	47	0	1	23	90	1	38	0	0	33	0	0	0		10	8	2	M2	Bone marrow aspirate		12	No
	TCGA-AB-2859-11B	NO	black or african american				Intermediate/Normal	40	25.17.0	Washington University	TCGA-AB-2859			YES	9	0		273C4633-76CA-4D31-8E41-CF50EC56DC90	NO	13		NO	No	NO		YES	2	47	0	1	23	90	1	38	0	0	33	0	0	0		10	8	2	M2	Bone marrow aspirate		12	No
	TCGA-AB-2859-11C	NO	black or african american				Intermediate/Normal	40	25.17.0	Washington University	TCGA-AB-2859			YES	9	0		273C4633-76CA-4D31-8E41-CF50EC56DC90	NO	13		NO	No	NO		YES	2	47	0	1	23	90	1	38	0	0	33	0	0	0		10	8	2	M2	Bone marrow aspirate		12	No
	TCGA-AB-2933-03A	NO	white				Intermediate/Normal	58	25.17.0	Washington University	TCGA-AB-2933			YES	9	0	RT-PCR	F730DD65-7E01-4940-A031-75679E717B5D	YES	20	YES	YES	No	NO		YES	0	79	2	0	64	100	1	11	3	6	2	0	0	4		9	101	7	M4	Bone marrow aspirate	NO	12	No
	TCGA-AB-2933-11A	NO	white				Intermediate/Normal	58	25.17.0	Washington University	TCGA-AB-2933			YES	9	0	RT-PCR	F730DD65-7E01-4940-A031-75679E717B5D	YES	20	YES	YES	No	NO		YES	0	79	2	0	64	100	1	11	3	6	2	0	0	4		9	101	7	M4	Bone marrow aspirate	NO	12	No
	TCGA-AB-2959-03A	NO	white				Intermediate/Normal	71	25.17.0	Washington University	TCGA-AB-2959			YES	9	0	RT-PCR	3A801E02-AF8C-4325-8435-8A5F754ED67B	YES	20	NO	YES	No	NO		YES	1	90	0	0	13	30	1	75	0	0	8	0	0	0		11	1	2	M0 Undifferentiated	Bone marrow aspirate	NO	12	No
	TCGA-AB-2959-11A	NO	white				Intermediate/Normal	71	25.17.0	Washington University	TCGA-AB-2959			YES	9	0	RT-PCR	3A801E02-AF8C-4325-8435-8A5F754ED67B	YES	20	NO	YES	No	NO		YES	1	90	0	0	13	30	1	75	0	0	8	0	0	0		11	1	2	M0 Undifferentiated	Bone marrow aspirate	NO	12	No
	TCGA-AB-2943-03A	NO	white				Poor	70	25.17.0	Washington University	TCGA-AB-2943			YES	9	0	RT-PCR	9770912F-B787-4CD8-AF8B-4B3F7AAA60CC	NO	20		YES	No	NO		YES	0	32	0	0	6	50	2	72	0	2	8	0	6	0		8	1	4	M1	Bone marrow aspirate	NO	12	No
	TCGA-AB-2943-11A	NO	white				Poor	70	25.17.0	Washington University	TCGA-AB-2943			YES	9	0	RT-PCR	9770912F-B787-4CD8-AF8B-4B3F7AAA60CC	NO	20		YES	No	NO		YES	0	32	0	0	6	50	2	72	0	2	8	0	6	0		8	1	4	M1	Bone marrow aspirate	NO	12	No
	TCGA-AB-2929-03A	NO	white				Poor	71	25.17.0	Washington University	TCGA-AB-2929			YES	9	0	RT-PCR	1E1E1537-E9E2-4A7A-B4AF-489CDCC1B002	YES	20	NO	YES	No	NO		YES	0	55	7	1	50		1	22	0	1	16	0	0	0		9	6	2	M0 Undifferentiated	Bone marrow aspirate	NO	12	Yes
	TCGA-AB-2929-11A	NO	white				Poor	71	25.17.0	Washington University	TCGA-AB-2929			YES	9	0	RT-PCR	1E1E1537-E9E2-4A7A-B4AF-489CDCC1B002	YES	20	NO	YES	No	NO		YES	0	55	7	1	50		1	22	0	1	16	0	0	0		9	6	2	M0 Undifferentiated	Bone marrow aspirate	NO	12	Yes
	TCGA-AB-2890-03A	NO	white				Poor	69	25.17.0	Washington University	TCGA-AB-2890			YES	9	0		2C13A088-9A37-473A-9ACB-971C0F3F394E	YES	20	NO	NO	No	NO		YES	8	60	1	0	22	50	1	65	0	0	2	0	0	0		11	6	1	M0 Undifferentiated	Bone marrow aspirate		12	No
	TCGA-AB-2890-11A	NO	white				Poor	69	25.17.0	Washington University	TCGA-AB-2890			YES	9	0		2C13A088-9A37-473A-9ACB-971C0F3F394E	YES	20	NO	NO	No	NO		YES	8	60	1	0	22	50	1	65	0	0	2	0	0	0		11	6	1	M0 Undifferentiated	Bone marrow aspirate		12	No
	TCGA-AB-3001-03A	NO	white				Favorable	31	25.17.0	Washington University	TCGA-AB-3001			YES	9	0		B1FCC03A-1896-4B42-AE47-D2B13D62511C	YES	20	YES	NO	No	NO		YES	0	40	4	0	0	65	0	32	0	0	62	0	0	0		11	2	2	M3	Bone marrow aspirate		12	No
	TCGA-AB-3001-11A	NO	white				Favorable	31	25.17.0	Washington University	TCGA-AB-3001			YES	9	0		B1FCC03A-1896-4B42-AE47-D2B13D62511C	YES	20	YES	NO	No	NO		YES	0	40	4	0	0	65	0	32	0	0	62	0	0	0		11	2	2	M3	Bone marrow aspirate		12	No
	TCGA-AB-2981-03A	NO	white				Intermediate/Normal	35	25.17.0	Washington University	TCGA-AB-2981	4000		YES	9	0	RT-PCR	EB21EA32-5832-4D6C-A8A8-04E450FC46D9	YES	20	NO	YES	Yes	YES	2	YES	0	87	0	0	8	100	0	21	1	0	0	0	41	0		9	72	29	M5	Bone marrow aspirate	YES	12	No
	TCGA-AB-2981-03B	NO	white				Intermediate/Normal	35	25.17.0	Washington University	TCGA-AB-2981	4000		YES	9	0	RT-PCR	EB21EA32-5832-4D6C-A8A8-04E450FC46D9	YES	20	NO	YES	Yes	YES	2	YES	0	87	0	0	8	100	0	21	1	0	0	0	41	0		9	72	29	M5	Bone marrow aspirate	YES	12	No
	TCGA-AB-2981-03C	NO	white				Intermediate/Normal	35	25.17.0	Washington University	TCGA-AB-2981	4000		YES	9	0	RT-PCR	EB21EA32-5832-4D6C-A8A8-04E450FC46D9	YES	20	NO	YES	Yes	YES	2	YES	0	87	0	0	8	100	0	21	1	0	0	0	41	0		9	72	29	M5	Bone marrow aspirate	YES	12	No
	TCGA-AB-2981-11A	NO	white				Intermediate/Normal	35	25.17.0	Washington University	TCGA-AB-2981	4000		YES	9	0	RT-PCR	EB21EA32-5832-4D6C-A8A8-04E450FC46D9	YES	20	NO	YES	Yes	YES	2	YES	0	87	0	0	8	100	0	21	1	0	0	0	41	0		9	72	29	M5	Bone marrow aspirate	YES	12	No
	TCGA-AB-2999-03A	NO	white				Favorable	62	25.17.0	Washington University	TCGA-AB-2999			YES	9	0		71FAC5C1-7382-44A0-81C8-E1287242264D	YES	20	YES	NO	No	NO		YES	6	82	2	0	11	90	0	65	0	1	10	0	0	0		9	1	5	M3	Bone marrow aspirate	NO	12	No
	TCGA-AB-2999-03B	NO	white				Favorable	62	25.17.0	Washington University	TCGA-AB-2999			YES	9	0		71FAC5C1-7382-44A0-81C8-E1287242264D	YES	20	YES	NO	No	NO		YES	6	82	2	0	11	90	0	65	0	1	10	0	0	0		9	1	5	M3	Bone marrow aspirate	NO	12	No
	TCGA-AB-2999-11A	NO	white				Favorable	62	25.17.0	Washington University	TCGA-AB-2999			YES	9	0		71FAC5C1-7382-44A0-81C8-E1287242264D	YES	20	YES	NO	No	NO		YES	6	82	2	0	11	90	0	65	0	1	10	0	0	0		9	1	5	M3	Bone marrow aspirate	NO	12	No
	TCGA-AB-2964-03A	NO	white				Intermediate/Normal	58	25.17.0	Washington University	TCGA-AB-2964			YES	9	0		BA5D123D-BE5E-4069-A129-E67159442204	YES	19	NO	NO	No	NO		YES	0	64	0	0	61	80	0	34	0	0	5	0	0	0		6	3	0	M1	Bone marrow aspirate		12	No
	TCGA-AB-2964-11A	NO	white				Intermediate/Normal	58	25.17.0	Washington University	TCGA-AB-2964			YES	9	0		BA5D123D-BE5E-4069-A129-E67159442204	YES	19	NO	NO	No	NO		YES	0	64	0	0	61	80	0	34	0	0	5	0	0	0		6	3	0	M1	Bone marrow aspirate		12	No
	TCGA-AB-2885-03A	NO	white				Poor	71	25.17.0	Washington University	TCGA-AB-2885			YES	9	0	RT-PCR	57E686FD-FD63-487A-8168-A9AB9AD9AAC7	YES	20	YES	YES	No	NO		YES	8	97	0	0	54	50	1	33	0	0	4	0	0	0		8	5	0	M0 Undifferentiated	Bone marrow aspirate	NO	12	No
	TCGA-AB-2885-11A	NO	white				Poor	71	25.17.0	Washington University	TCGA-AB-2885			YES	9	0	RT-PCR	57E686FD-FD63-487A-8168-A9AB9AD9AAC7	YES	20	YES	YES	No	NO		YES	8	97	0	0	54	50	1	33	0	0	4	0	0	0		8	5	0	M0 Undifferentiated	Bone marrow aspirate	NO	12	No
	TCGA-AB-2944-03A	NO	white				Poor	48	25.17.0	Washington University	TCGA-AB-2944	9000		YES	9	0	RT-PCR	509DC4D9-730E-45D2-AE05-3AADB9DAD7A0	YES	5	YES	YES	Yes	YES	3	YES	0	92	1	0	87	100	2	8	0	0	1	0	0	0		9	111	1	M0 Undifferentiated	Bone marrow aspirate	YES	12	No
	TCGA-AB-2944-11A	NO	white				Poor	48	25.17.0	Washington University	TCGA-AB-2944	9000		YES	9	0	RT-PCR	509DC4D9-730E-45D2-AE05-3AADB9DAD7A0	YES	5	YES	YES	Yes	YES	3	YES	0	92	1	0	87	100	2	8	0	0	1	0	0	0		9	111	1	M0 Undifferentiated	Bone marrow aspirate	YES	12	No
	TCGA-AB-2911-03A	NO	black or african american				Poor	51	25.17.0	Washington University	TCGA-AB-2911	2000		YES	9	0		FFEB7C49-D121-4503-897E-834AE0696153	YES	20	YES	NO	Yes	YES	1	YES	0	39	0	0	39	90	0	13	0	9	0	0	0	0		11	50	39	M4	Bone marrow aspirate		12	No
	TCGA-AB-2911-11A	NO	black or african american				Poor	51	25.17.0	Washington University	TCGA-AB-2911	2000		YES	9	0		FFEB7C49-D121-4503-897E-834AE0696153	YES	20	YES	NO	Yes	YES	1	YES	0	39	0	0	39	90	0	13	0	9	0	0	0	0		11	50	39	M4	Bone marrow aspirate		12	No
	TCGA-AB-2886-03A	NO	white				Favorable	26	25.17.0	Washington University	TCGA-AB-2886	4000	Yes	YES	9	0	RT-PCR	00CF4D41-7856-42AD-A5EA-93FFF0A6F9A9	YES	20	YES	YES	Yes	YES	3	YES	0	72	1	0	50	90	0	27	0	1	19	0	0	0		9	11	2	M2	Bone marrow aspirate	NO	12	No
	TCGA-AB-2886-11A	NO	white				Favorable	26	25.17.0	Washington University	TCGA-AB-2886	4000	Yes	YES	9	0	RT-PCR	00CF4D41-7856-42AD-A5EA-93FFF0A6F9A9	YES	20	YES	YES	Yes	YES	3	YES	0	72	1	0	50	90	0	27	0	1	19	0	0	0		9	11	2	M2	Bone marrow aspirate	NO	12	No
	TCGA-AB-3008-03A	NO	white				Intermediate/Normal	22	25.17.0	Washington University	TCGA-AB-3008	8000		YES	9	0		284542AE-647B-431D-8871-AC855FCF2559	YES	30	NO	NO	Yes	YES	3	YES	0	71	0	0	90	90	0	9	0	0	0	0	1	0		8	115	0	M1	Bone marrow aspirate		12	No
	TCGA-AB-3008-11A	NO	white				Intermediate/Normal	22	25.17.0	Washington University	TCGA-AB-3008	8000		YES	9	0		284542AE-647B-431D-8871-AC855FCF2559	YES	30	NO	NO	Yes	YES	3	YES	0	71	0	0	90	90	0	9	0	0	0	0	1	0		8	115	0	M1	Bone marrow aspirate		12	No
	TCGA-AB-2923-03A	NO	white				Intermediate/Normal	78	25.17.0	Washington University	TCGA-AB-2923			YES	9	0	RT-PCR	DB535881-6790-4406-A3FA-5E06292EDA4C	NO	20		YES	No	NO		YES	7	70	1	0	28	90	0	20	1	4	14	0	7	0		9	17	18	M4	Bone marrow aspirate	NO	12	No
	TCGA-AB-2923-11A	NO	white				Intermediate/Normal	78	25.17.0	Washington University	TCGA-AB-2923			YES	9	0	RT-PCR	DB535881-6790-4406-A3FA-5E06292EDA4C	NO	20		YES	No	NO		YES	7	70	1	0	28	90	0	20	1	4	14	0	7	0		9	17	18	M4	Bone marrow aspirate	NO	12	No
	TCGA-AB-2976-03A	NO	white				Intermediate/Normal	53	25.17.0	Washington University	TCGA-AB-2976	1000		YES	9	0	RT-PCR	8CFCBD6C-83A7-46EB-B1D8-FFB1BDD5C921	YES	20	NO	YES	Yes	YES	1	YES	0	86	4	0	52	90	0	6	0	1	35	0	1	0		9	88	1	M1	Bone marrow aspirate	YES	12	No
	TCGA-AB-2976-11A	NO	white				Intermediate/Normal	53	25.17.0	Washington University	TCGA-AB-2976	1000		YES	9	0	RT-PCR	8CFCBD6C-83A7-46EB-B1D8-FFB1BDD5C921	YES	20	NO	YES	Yes	YES	1	YES	0	86	4	0	52	90	0	6	0	1	35	0	1	0		9	88	1	M1	Bone marrow aspirate	YES	12	No
	TCGA-AB-2815-03A	NO	white				Favorable	49	25.17.0	Washington University	TCGA-AB-2815	5000		YES	9	0		C041887B-09D5-404F-97BB-F653C6E9CAAC	YES	20	YES	NO	Yes	YES	3	YES	11	81	0	0	48	95	1	11	0	0	2	0	0	0		8	57	26	M4	Bone marrow aspirate		12	No
	TCGA-AB-2815-03B	NO	white				Favorable	49	25.17.0	Washington University	TCGA-AB-2815	5000		YES	9	0		C041887B-09D5-404F-97BB-F653C6E9CAAC	YES	20	YES	NO	Yes	YES	3	YES	11	81	0	0	48	95	1	11	0	0	2	0	0	0		8	57	26	M4	Bone marrow aspirate		12	No
	TCGA-AB-2815-03C	NO	white				Favorable	49	25.17.0	Washington University	TCGA-AB-2815	5000		YES	9	0		C041887B-09D5-404F-97BB-F653C6E9CAAC	YES	20	YES	NO	Yes	YES	3	YES	11	81	0	0	48	95	1	11	0	0	2	0	0	0		8	57	26	M4	Bone marrow aspirate		12	No
	TCGA-AB-2815-11A	NO	white				Favorable	49	25.17.0	Washington University	TCGA-AB-2815	5000		YES	9	0		C041887B-09D5-404F-97BB-F653C6E9CAAC	YES	20	YES	NO	Yes	YES	3	YES	11	81	0	0	48	95	1	11	0	0	2	0	0	0		8	57	26	M4	Bone marrow aspirate		12	No
	TCGA-AB-2815-11B	NO	white				Favorable	49	25.17.0	Washington University	TCGA-AB-2815	5000		YES	9	0		C041887B-09D5-404F-97BB-F653C6E9CAAC	YES	20	YES	NO	Yes	YES	3	YES	11	81	0	0	48	95	1	11	0	0	2	0	0	0		8	57	26	M4	Bone marrow aspirate		12	No
	TCGA-AB-2815-11C	NO	white				Favorable	49	25.17.0	Washington University	TCGA-AB-2815	5000		YES	9	0		C041887B-09D5-404F-97BB-F653C6E9CAAC	YES	20	YES	NO	Yes	YES	3	YES	11	81	0	0	48	95	1	11	0	0	2	0	0	0		8	57	26	M4	Bone marrow aspirate		12	No
	TCGA-AB-2914-03A	NO	white				Favorable	22	25.17.0	Washington University	TCGA-AB-2914			YES	9	0	RT-PCR	390BDCA7-15B9-488E-B4C1-F1E4FC57E3C4	YES	20	YES	YES	No	NO		YES	0	55	1	0	70	70	0	9	0	1	5	0	0	0		11	52	14	M2	Bone marrow aspirate	YES	12	No
	TCGA-AB-2914-11A	NO	white				Favorable	22	25.17.0	Washington University	TCGA-AB-2914			YES	9	0	RT-PCR	390BDCA7-15B9-488E-B4C1-F1E4FC57E3C4	YES	20	YES	YES	No	NO		YES	0	55	1	0	70	70	0	9	0	1	5	0	0	0		11	52	14	M2	Bone marrow aspirate	YES	12	No
	TCGA-AB-2838-03A	NO	white				Poor	67	25.17.0	Washington University	TCGA-AB-2838		21	YES	9	0		385F4A7B-A4E5-4E58-9D1E-6197145FB07D	NO	20		NO	No	NO		YES	8	50	1	0	17	60	0	53	1	0	3	0	3	1		9	2	10	M2	Bone marrow aspirate		12	No
	TCGA-AB-2838-03B	NO	white				Poor	67	25.17.0	Washington University	TCGA-AB-2838		21	YES	9	0		385F4A7B-A4E5-4E58-9D1E-6197145FB07D	NO	20		NO	No	NO		YES	8	50	1	0	17	60	0	53	1	0	3	0	3	1		9	2	10	M2	Bone marrow aspirate		12	No
	TCGA-AB-2838-03C	NO	white				Poor	67	25.17.0	Washington University	TCGA-AB-2838		21	YES	9	0		385F4A7B-A4E5-4E58-9D1E-6197145FB07D	NO	20		NO	No	NO		YES	8	50	1	0	17	60	0	53	1	0	3	0	3	1		9	2	10	M2	Bone marrow aspirate		12	No
	TCGA-AB-2838-11A	NO	white				Poor	67	25.17.0	Washington University	TCGA-AB-2838		21	YES	9	0		385F4A7B-A4E5-4E58-9D1E-6197145FB07D	NO	20		NO	No	NO		YES	8	50	1	0	17	60	0	53	1	0	3	0	3	1		9	2	10	M2	Bone marrow aspirate		12	No
	TCGA-AB-2838-11B	NO	white				Poor	67	25.17.0	Washington University	TCGA-AB-2838		21	YES	9	0		385F4A7B-A4E5-4E58-9D1E-6197145FB07D	NO	20		NO	No	NO		YES	8	50	1	0	17	60	0	53	1	0	3	0	3	1		9	2	10	M2	Bone marrow aspirate		12	No
	TCGA-AB-2838-11C	NO	white				Poor	67	25.17.0	Washington University	TCGA-AB-2838		21	YES	9	0		385F4A7B-A4E5-4E58-9D1E-6197145FB07D	NO	20		NO	No	NO		YES	8	50	1	0	17	60	0	53	1	0	3	0	3	1		9	2	10	M2	Bone marrow aspirate		12	No
	TCGA-AB-2839-03A	NO	white				Intermediate/Normal	51	25.17.0	Washington University	TCGA-AB-2839	2000		YES	9	0		387D5212-FED5-4E25-B8CA-DE59F9DA9622	YES	20	NO	NO	Yes	YES	2	YES	0	64	0	0	79	90	0	0	1	0	0	0	0	0		13	42	0	M2	Bone marrow aspirate		12	No
	TCGA-AB-2839-03B	NO	white				Intermediate/Normal	51	25.17.0	Washington University	TCGA-AB-2839	2000		YES	9	0		387D5212-FED5-4E25-B8CA-DE59F9DA9622	YES	20	NO	NO	Yes	YES	2	YES	0	64	0	0	79	90	0	0	1	0	0	0	0	0		13	42	0	M2	Bone marrow aspirate		12	No
	TCGA-AB-2839-03C	NO	white				Intermediate/Normal	51	25.17.0	Washington University	TCGA-AB-2839	2000		YES	9	0		387D5212-FED5-4E25-B8CA-DE59F9DA9622	YES	20	NO	NO	Yes	YES	2	YES	0	64	0	0	79	90	0	0	1	0	0	0	0	0		13	42	0	M2	Bone marrow aspirate		12	No
	TCGA-AB-2839-11A	NO	white				Intermediate/Normal	51	25.17.0	Washington University	TCGA-AB-2839	2000		YES	9	0		387D5212-FED5-4E25-B8CA-DE59F9DA9622	YES	20	NO	NO	Yes	YES	2	YES	0	64	0	0	79	90	0	0	1	0	0	0	0	0		13	42	0	M2	Bone marrow aspirate		12	No
	TCGA-AB-2839-11B	NO	white				Intermediate/Normal	51	25.17.0	Washington University	TCGA-AB-2839	2000		YES	9	0		387D5212-FED5-4E25-B8CA-DE59F9DA9622	YES	20	NO	NO	Yes	YES	2	YES	0	64	0	0	79	90	0	0	1	0	0	0	0	0		13	42	0	M2	Bone marrow aspirate		12	No
	TCGA-AB-2839-11C	NO	white				Intermediate/Normal	51	25.17.0	Washington University	TCGA-AB-2839	2000		YES	9	0		387D5212-FED5-4E25-B8CA-DE59F9DA9622	YES	20	NO	NO	Yes	YES	2	YES	0	64	0	0	79	90	0	0	1	0	0	0	0	0		13	42	0	M2	Bone marrow aspirate		12	No
	TCGA-AB-2881-03A	NO	white				Favorable	48	25.17.0	Washington University	TCGA-AB-2881			YES	9	0	RT-PCR	74A9CEDE-37C2-4012-915B-4C4945D8D54D	YES	20	YES	YES	No	NO		YES	2	75	2	0	41	90	0	26	0	1	2	0	10	0		10	33	17	M1	Bone marrow aspirate	NO	12	No
	TCGA-AB-2881-11A	NO	white				Favorable	48	25.17.0	Washington University	TCGA-AB-2881			YES	9	0	RT-PCR	74A9CEDE-37C2-4012-915B-4C4945D8D54D	YES	20	YES	YES	No	NO		YES	2	75	2	0	41	90	0	26	0	1	2	0	10	0		10	33	17	M1	Bone marrow aspirate	NO	12	No
	TCGA-AB-2813-03A	NO	white				Poor	78	25.17.0	Washington University	TCGA-AB-2813		21	YES	9	0		207FABAB-B0AB-40F2-8D87-1C9F601486FE	YES	20	YES	NO	No	NO		YES	0	40	7	0	6	80	0	23	3	4	13	0	14	3		10	10	25	M4	Bone marrow aspirate		12	No
	TCGA-AB-2813-03B	NO	white				Poor	78	25.17.0	Washington University	TCGA-AB-2813		21	YES	9	0		207FABAB-B0AB-40F2-8D87-1C9F601486FE	YES	20	YES	NO	No	NO		YES	0	40	7	0	6	80	0	23	3	4	13	0	14	3		10	10	25	M4	Bone marrow aspirate		12	No
	TCGA-AB-2813-03C	NO	white				Poor	78	25.17.0	Washington University	TCGA-AB-2813		21	YES	9	0		207FABAB-B0AB-40F2-8D87-1C9F601486FE	YES	20	YES	NO	No	NO		YES	0	40	7	0	6	80	0	23	3	4	13	0	14	3		10	10	25	M4	Bone marrow aspirate		12	No
	TCGA-AB-2813-11A	NO	white				Poor	78	25.17.0	Washington University	TCGA-AB-2813		21	YES	9	0		207FABAB-B0AB-40F2-8D87-1C9F601486FE	YES	20	YES	NO	No	NO		YES	0	40	7	0	6	80	0	23	3	4	13	0	14	3		10	10	25	M4	Bone marrow aspirate		12	No
	TCGA-AB-2813-11B	NO	white				Poor	78	25.17.0	Washington University	TCGA-AB-2813		21	YES	9	0		207FABAB-B0AB-40F2-8D87-1C9F601486FE	YES	20	YES	NO	No	NO		YES	0	40	7	0	6	80	0	23	3	4	13	0	14	3		10	10	25	M4	Bone marrow aspirate		12	No
	TCGA-AB-2813-11C	NO	white				Poor	78	25.17.0	Washington University	TCGA-AB-2813		21	YES	9	0		207FABAB-B0AB-40F2-8D87-1C9F601486FE	YES	20	YES	NO	No	NO		YES	0	40	7	0	6	80	0	23	3	4	13	0	14	3		10	10	25	M4	Bone marrow aspirate		12	No
	TCGA-AB-2947-03A	NO	white				Intermediate/Normal	52	25.17.0	Washington University	TCGA-AB-2947	500		YES	9	0	RT-PCR	4760609A-F8BE-4602-99D3-F109FDD15691	YES	20	NO	YES	Yes	YES	1	YES	0	75	0	0	51	90	1	4	0	2	1	0	3	0		9	298	38	M4	Bone marrow aspirate	NO	12	No
	TCGA-AB-2947-11A	NO	white				Intermediate/Normal	52	25.17.0	Washington University	TCGA-AB-2947	500		YES	9	0	RT-PCR	4760609A-F8BE-4602-99D3-F109FDD15691	YES	20	NO	YES	Yes	YES	1	YES	0	75	0	0	51	90	1	4	0	2	1	0	3	0		9	298	38	M4	Bone marrow aspirate	NO	12	No
	TCGA-AB-2918-03A	NO	white				Poor	47	25.17.0	Washington University	TCGA-AB-2918	4000		YES	9	0	RT-PCR	E2A598AD-288C-4EB5-BA1C-CA3E3D0D1978	YES	20	YES	YES	Yes	YES	2	YES	0	77	0	0	79		1	10	0	1	4	0	0	0		10	81	4	M1	Bone marrow aspirate	YES	12	No
	TCGA-AB-2918-11A	NO	white				Poor	47	25.17.0	Washington University	TCGA-AB-2918	4000		YES	9	0	RT-PCR	E2A598AD-288C-4EB5-BA1C-CA3E3D0D1978	YES	20	YES	YES	Yes	YES	2	YES	0	77	0	0	79		1	10	0	1	4	0	0	0		10	81	4	M1	Bone marrow aspirate	YES	12	No
	TCGA-AB-2832-03A	NO	white				Intermediate/Normal	60	25.17.0	Washington University	TCGA-AB-2832			YES	9	0		C9404755-677D-46B4-BB2F-A66D3FD5D33E	YES	30	YES	NO	No	NO		YES	0	95	0	0	0	100	0	23	0	0	1	0	0	0		11	12	76	M5	Bone marrow aspirate		12	No
	TCGA-AB-2832-03B	NO	white				Intermediate/Normal	60	25.17.0	Washington University	TCGA-AB-2832			YES	9	0		C9404755-677D-46B4-BB2F-A66D3FD5D33E	YES	30	YES	NO	No	NO		YES	0	95	0	0	0	100	0	23	0	0	1	0	0	0		11	12	76	M5	Bone marrow aspirate		12	No
	TCGA-AB-2832-03C	NO	white				Intermediate/Normal	60	25.17.0	Washington University	TCGA-AB-2832			YES	9	0		C9404755-677D-46B4-BB2F-A66D3FD5D33E	YES	30	YES	NO	No	NO		YES	0	95	0	0	0	100	0	23	0	0	1	0	0	0		11	12	76	M5	Bone marrow aspirate		12	No
	TCGA-AB-2832-11A	NO	white				Intermediate/Normal	60	25.17.0	Washington University	TCGA-AB-2832			YES	9	0		C9404755-677D-46B4-BB2F-A66D3FD5D33E	YES	30	YES	NO	No	NO		YES	0	95	0	0	0	100	0	23	0	0	1	0	0	0		11	12	76	M5	Bone marrow aspirate		12	No
	TCGA-AB-2832-11B	NO	white				Intermediate/Normal	60	25.17.0	Washington University	TCGA-AB-2832			YES	9	0		C9404755-677D-46B4-BB2F-A66D3FD5D33E	YES	30	YES	NO	No	NO		YES	0	95	0	0	0	100	0	23	0	0	1	0	0	0		11	12	76	M5	Bone marrow aspirate		12	No
	TCGA-AB-2832-11C	NO	white				Intermediate/Normal	60	25.17.0	Washington University	TCGA-AB-2832			YES	9	0		C9404755-677D-46B4-BB2F-A66D3FD5D33E	YES	30	YES	NO	No	NO		YES	0	95	0	0	0	100	0	23	0	0	1	0	0	0		11	12	76	M5	Bone marrow aspirate		12	No
	TCGA-AB-2848-03A	NO	white				Intermediate/Normal	62	25.17.0	Washington University	TCGA-AB-2848	4000	No	YES	9	0		8509417B-92C5-4E91-83FB-04E19918FC0C	YES	20	NO	NO	Yes	YES	2	YES	2	65	4	0	65	80	0	10	0	2	5	0	0	5		11	119	0	M4	Bone marrow aspirate		12	No
	TCGA-AB-2848-03B	NO	white				Intermediate/Normal	62	25.17.0	Washington University	TCGA-AB-2848	4000	No	YES	9	0		8509417B-92C5-4E91-83FB-04E19918FC0C	YES	20	NO	NO	Yes	YES	2	YES	2	65	4	0	65	80	0	10	0	2	5	0	0	5		11	119	0	M4	Bone marrow aspirate		12	No
	TCGA-AB-2848-03C	NO	white				Intermediate/Normal	62	25.17.0	Washington University	TCGA-AB-2848	4000	No	YES	9	0		8509417B-92C5-4E91-83FB-04E19918FC0C	YES	20	NO	NO	Yes	YES	2	YES	2	65	4	0	65	80	0	10	0	2	5	0	0	5		11	119	0	M4	Bone marrow aspirate		12	No
	TCGA-AB-2848-11A	NO	white				Intermediate/Normal	62	25.17.0	Washington University	TCGA-AB-2848	4000	No	YES	9	0		8509417B-92C5-4E91-83FB-04E19918FC0C	YES	20	NO	NO	Yes	YES	2	YES	2	65	4	0	65	80	0	10	0	2	5	0	0	5		11	119	0	M4	Bone marrow aspirate		12	No
	TCGA-AB-2848-11B	NO	white				Intermediate/Normal	62	25.17.0	Washington University	TCGA-AB-2848	4000	No	YES	9	0		8509417B-92C5-4E91-83FB-04E19918FC0C	YES	20	NO	NO	Yes	YES	2	YES	2	65	4	0	65	80	0	10	0	2	5	0	0	5		11	119	0	M4	Bone marrow aspirate		12	No
	TCGA-AB-2848-11C	NO	white				Intermediate/Normal	62	25.17.0	Washington University	TCGA-AB-2848	4000	No	YES	9	0		8509417B-92C5-4E91-83FB-04E19918FC0C	YES	20	NO	NO	Yes	YES	2	YES	2	65	4	0	65	80	0	10	0	2	5	0	0	5		11	119	0	M4	Bone marrow aspirate		12	No
	TCGA-AB-2928-03A	NO	black or african american				Poor	43	25.17.0	Washington University	TCGA-AB-2928	9000		YES	9	0	RT-PCR	6955F9D4-1049-4AC0-B8ED-5423F031827C	YES	20	YES	YES	Yes	YES	3	YES		87	0	0	91	90	0	9	0	0	0	0	0	0		10	172	0	M1	Bone marrow aspirate	YES	12	No
	TCGA-AB-2928-11A	NO	black or african american				Poor	43	25.17.0	Washington University	TCGA-AB-2928	9000		YES	9	0	RT-PCR	6955F9D4-1049-4AC0-B8ED-5423F031827C	YES	20	YES	YES	Yes	YES	3	YES		87	0	0	91	90	0	9	0	0	0	0	0	0		10	172	0	M1	Bone marrow aspirate	YES	12	No
	TCGA-AB-2811-03A	NO	white				Intermediate/Normal	81	25.17.0	Washington University	TCGA-AB-2811	0		YES	9	0		1F768892-9212-4AC4-90D6-FA5B8829FE4D	YES	25	NO	NO	No	NO	0	YES	0	98	1	0	37	95	0	14	0	2	2	0	0	0		11	91	20	M4	Bone marrow aspirate		12	No
	TCGA-AB-2811-03B	NO	white				Intermediate/Normal	81	25.17.0	Washington University	TCGA-AB-2811	0		YES	9	0		1F768892-9212-4AC4-90D6-FA5B8829FE4D	YES	25	NO	NO	No	NO	0	YES	0	98	1	0	37	95	0	14	0	2	2	0	0	0		11	91	20	M4	Bone marrow aspirate		12	No
	TCGA-AB-2811-03C	NO	white				Intermediate/Normal	81	25.17.0	Washington University	TCGA-AB-2811	0		YES	9	0		1F768892-9212-4AC4-90D6-FA5B8829FE4D	YES	25	NO	NO	No	NO	0	YES	0	98	1	0	37	95	0	14	0	2	2	0	0	0		11	91	20	M4	Bone marrow aspirate		12	No
	TCGA-AB-2811-11A	NO	white				Intermediate/Normal	81	25.17.0	Washington University	TCGA-AB-2811	0		YES	9	0		1F768892-9212-4AC4-90D6-FA5B8829FE4D	YES	25	NO	NO	No	NO	0	YES	0	98	1	0	37	95	0	14	0	2	2	0	0	0		11	91	20	M4	Bone marrow aspirate		12	No
	TCGA-AB-2811-11B	NO	white				Intermediate/Normal	81	25.17.0	Washington University	TCGA-AB-2811	0		YES	9	0		1F768892-9212-4AC4-90D6-FA5B8829FE4D	YES	25	NO	NO	No	NO	0	YES	0	98	1	0	37	95	0	14	0	2	2	0	0	0		11	91	20	M4	Bone marrow aspirate		12	No
	TCGA-AB-2811-11C	NO	white				Intermediate/Normal	81	25.17.0	Washington University	TCGA-AB-2811	0		YES	9	0		1F768892-9212-4AC4-90D6-FA5B8829FE4D	YES	25	NO	NO	No	NO	0	YES	0	98	1	0	37	95	0	14	0	2	2	0	0	0		11	91	20	M4	Bone marrow aspirate		12	No
	TCGA-AB-3007-03A	NO	white				Favorable	35	25.17.0	Washington University	TCGA-AB-3007		NO	YES	9	0		6E308D22-6141-4777-8F18-88915C5162EF	YES	20	YES	NO	No	NO		YES	0	90	5	0	7	90	1	50	0	1	34	0	0	1		12	2	1	M3	Bone marrow aspirate		12	No
	TCGA-AB-3007-11A	NO	white				Favorable	35	25.17.0	Washington University	TCGA-AB-3007		NO	YES	9	0		6E308D22-6141-4777-8F18-88915C5162EF	YES	20	YES	NO	No	NO		YES	0	90	5	0	7	90	1	50	0	1	34	0	0	1		12	2	1	M3	Bone marrow aspirate		12	No
	TCGA-AB-3002-03A	NO	white				Intermediate/Normal	68	25.17.0	Washington University	TCGA-AB-3002	0		YES	9	0		371FDCFB-F547-4E41-8A36-AFA067D5508E	YES	20	NO	NO	No	NO	0	YES	2	48	3	0	48	50	0	29	4	1	6	0	0	0		7	6	7	M2	Bone marrow aspirate		12	No
	TCGA-AB-3002-11A	NO	white				Intermediate/Normal	68	25.17.0	Washington University	TCGA-AB-3002	0		YES	9	0		371FDCFB-F547-4E41-8A36-AFA067D5508E	YES	20	NO	NO	No	NO	0	YES	2	48	3	0	48	50	0	29	4	1	6	0	0	0		7	6	7	M2	Bone marrow aspirate		12	No
	TCGA-AB-2887-03A	NO	white				Intermediate/Normal	60	25.17.0	Washington University	TCGA-AB-2887			YES	9	0	RT-PCR	BAF95AEC-2F62-455D-982B-B59635F54BA1	YES	20	YES	YES	No	NO		YES	0	87	0	0	65	80	0	31	0	0	4	0	0	0		9	47	0	M1	Bone marrow aspirate	NO	12	No
	TCGA-AB-2887-11A	NO	white				Intermediate/Normal	60	25.17.0	Washington University	TCGA-AB-2887			YES	9	0	RT-PCR	BAF95AEC-2F62-455D-982B-B59635F54BA1	YES	20	YES	YES	No	NO		YES	0	87	0	0	65	80	0	31	0	0	4	0	0	0		9	47	0	M1	Bone marrow aspirate	NO	12	No
	TCGA-AB-2924-03A	NO	white				Intermediate/Normal	59	25.17.0	Washington University	TCGA-AB-2924		No	YES	9	0	RT-PCR	602415E9-85E1-4ED5-B969-893FD50E5D17	YES	20	NO	YES	No	NO		YES	0	75	0	1	17	90	0	12	1	0	21	0	14	0		9	30	34	M4	Bone marrow aspirate	YES	12	No
	TCGA-AB-2924-11A	NO	white				Intermediate/Normal	59	25.17.0	Washington University	TCGA-AB-2924		No	YES	9	0	RT-PCR	602415E9-85E1-4ED5-B969-893FD50E5D17	YES	20	NO	YES	No	NO		YES	0	75	0	1	17	90	0	12	1	0	21	0	14	0		9	30	34	M4	Bone marrow aspirate	YES	12	No
	TCGA-AB-2970-03A	NO	white				Intermediate/Normal	34	25.17.0	Washington University	TCGA-AB-2970			YES	9	0	RT-PCR	BF4D77FE-60BA-4433-AC89-81E5BCEE52F4	YES	20	NO	YES	No	NO		YES	1	71	1	0	58	90	0	11	0	0	3	0	6	0		11	20	20	M4	Bone marrow aspirate	YES	12	Yes
	TCGA-AB-2970-11A	NO	white				Intermediate/Normal	34	25.17.0	Washington University	TCGA-AB-2970			YES	9	0	RT-PCR	BF4D77FE-60BA-4433-AC89-81E5BCEE52F4	YES	20	NO	YES	No	NO		YES	1	71	1	0	58	90	0	11	0	0	3	0	6	0		11	20	20	M4	Bone marrow aspirate	YES	12	Yes
	TCGA-AB-2975-03A	NO	black or african american				Intermediate/Normal	54	25.17.0	Washington University	TCGA-AB-2975			YES	9	0	RT-PCR	A1627BEB-77A3-426F-94C0-0A8B08A85D2D	YES	19	NO	YES	No	NO		YES	0	67	1	0	71	90	0	18	0	4	1	0	0	2		8	68	3	M2	Bone marrow aspirate	NO	12	No
	TCGA-AB-2975-11A	NO	black or african american				Intermediate/Normal	54	25.17.0	Washington University	TCGA-AB-2975			YES	9	0	RT-PCR	A1627BEB-77A3-426F-94C0-0A8B08A85D2D	YES	19	NO	YES	No	NO		YES	0	67	1	0	71	90	0	18	0	4	1	0	0	2		8	68	3	M2	Bone marrow aspirate	NO	12	No
	TCGA-AB-2978-03A	NO	white				Intermediate/Normal	61	25.17.0	Washington University	TCGA-AB-2978	0		YES	9	0	RT-PCR	086D76FD-0C51-4392-B208-E4C6A2A30738	NO	20		YES	No	NO	0	YES	0	43	0	0	32	90	4	27	0	0	22	0	0	0		10	10	15	M2	Bone marrow aspirate	NO	12	No
	TCGA-AB-2978-11A	NO	white				Intermediate/Normal	61	25.17.0	Washington University	TCGA-AB-2978	0		YES	9	0	RT-PCR	086D76FD-0C51-4392-B208-E4C6A2A30738	NO	20		YES	No	NO	0	YES	0	43	0	0	32	90	4	27	0	0	22	0	0	0		10	10	15	M2	Bone marrow aspirate	NO	12	No
	TCGA-AB-3000-03A	NO	white				Intermediate/Normal	25	25.17.0	Washington University	TCGA-AB-3000	4000		YES	9	0		A3A480A6-A8AC-48BC-9B4D-15EC1681BD93	NO	20		NO	Yes	YES	2	YES	0	56	1	0	71	90	0	8	3	5	6	0	0	2		9	99	4	M2	Bone marrow aspirate		12	No
	TCGA-AB-3000-11A	NO	white				Intermediate/Normal	25	25.17.0	Washington University	TCGA-AB-3000	4000		YES	9	0		A3A480A6-A8AC-48BC-9B4D-15EC1681BD93	NO	20		NO	Yes	YES	2	YES	0	56	1	0	71	90	0	8	3	5	6	0	0	2		9	99	4	M2	Bone marrow aspirate		12	No
	TCGA-AB-2840-03A	NO	white				Favorable	74	25.17.0	Washington University	TCGA-AB-2840	5000		YES	9	0	RT-PCR	16D6E805-AD7B-4168-9810-C455C09A2A64	YES	20	NO	YES	Yes	YES	3	YES	0	51	1	0	0	95	0	27	1	0	0	0	0	71		9	32	0	M3	Bone marrow aspirate	NO	12	No
	TCGA-AB-2840-03B	NO	white				Favorable	74	25.17.0	Washington University	TCGA-AB-2840	5000		YES	9	0	RT-PCR	16D6E805-AD7B-4168-9810-C455C09A2A64	YES	20	NO	YES	Yes	YES	3	YES	0	51	1	0	0	95	0	27	1	0	0	0	0	71		9	32	0	M3	Bone marrow aspirate	NO	12	No
	TCGA-AB-2840-03C	NO	white				Favorable	74	25.17.0	Washington University	TCGA-AB-2840	5000		YES	9	0	RT-PCR	16D6E805-AD7B-4168-9810-C455C09A2A64	YES	20	NO	YES	Yes	YES	3	YES	0	51	1	0	0	95	0	27	1	0	0	0	0	71		9	32	0	M3	Bone marrow aspirate	NO	12	No
	TCGA-AB-2840-03D	NO	white				Favorable	74	25.17.0	Washington University	TCGA-AB-2840	5000		YES	9	0	RT-PCR	16D6E805-AD7B-4168-9810-C455C09A2A64	YES	20	NO	YES	Yes	YES	3	YES	0	51	1	0	0	95	0	27	1	0	0	0	0	71		9	32	0	M3	Bone marrow aspirate	NO	12	No
	TCGA-AB-2840-11A	NO	white				Favorable	74	25.17.0	Washington University	TCGA-AB-2840	5000		YES	9	0	RT-PCR	16D6E805-AD7B-4168-9810-C455C09A2A64	YES	20	NO	YES	Yes	YES	3	YES	0	51	1	0	0	95	0	27	1	0	0	0	0	71		9	32	0	M3	Bone marrow aspirate	NO	12	No
	TCGA-AB-2840-11B	NO	white				Favorable	74	25.17.0	Washington University	TCGA-AB-2840	5000		YES	9	0	RT-PCR	16D6E805-AD7B-4168-9810-C455C09A2A64	YES	20	NO	YES	Yes	YES	3	YES	0	51	1	0	0	95	0	27	1	0	0	0	0	71		9	32	0	M3	Bone marrow aspirate	NO	12	No
	TCGA-AB-2840-11C	NO	white				Favorable	74	25.17.0	Washington University	TCGA-AB-2840	5000		YES	9	0	RT-PCR	16D6E805-AD7B-4168-9810-C455C09A2A64	YES	20	NO	YES	Yes	YES	3	YES	0	51	1	0	0	95	0	27	1	0	0	0	0	71		9	32	0	M3	Bone marrow aspirate	NO	12	No
	TCGA-AB-2840-11D	NO	white				Favorable	74	25.17.0	Washington University	TCGA-AB-2840	5000		YES	9	0	RT-PCR	16D6E805-AD7B-4168-9810-C455C09A2A64	YES	20	NO	YES	Yes	YES	3	YES	0	51	1	0	0	95	0	27	1	0	0	0	0	71		9	32	0	M3	Bone marrow aspirate	NO	12	No
	TCGA-AB-2904-03A	NO	white				Poor	65	25.17.0	Washington University	TCGA-AB-2904	0		YES	9	0	RT-PCR	98D9883F-F054-4342-BDE5-B295F3C878FE	YES	20	YES	YES	No	NO	0	YES	3	83	0	0	0	60	0	94	0	0	3	0	0	0		10	1	0	M0 Undifferentiated	Bone marrow aspirate	YES	12	No
	TCGA-AB-2904-11A	NO	white				Poor	65	25.17.0	Washington University	TCGA-AB-2904	0		YES	9	0	RT-PCR	98D9883F-F054-4342-BDE5-B295F3C878FE	YES	20	YES	YES	No	NO	0	YES	3	83	0	0	0	60	0	94	0	0	3	0	0	0		10	1	0	M0 Undifferentiated	Bone marrow aspirate	YES	12	No
	TCGA-AB-2876-03A	NO	white				Intermediate/Normal	45	25.17.0	Washington University	TCGA-AB-2876			YES	9	0		915233D4-2353-4EF6-975A-5A178AB722CF	YES	20	NO	NO	No	NO		YES	0	56	5	1	37	90	4	13	1	1	36	0	0	0		8	29	2	M2	Bone marrow aspirate		12	No
	TCGA-AB-2876-11A	NO	white				Intermediate/Normal	45	25.17.0	Washington University	TCGA-AB-2876			YES	9	0		915233D4-2353-4EF6-975A-5A178AB722CF	YES	20	NO	NO	No	NO		YES	0	56	5	1	37	90	4	13	1	1	36	0	0	0		8	29	2	M2	Bone marrow aspirate		12	No
	TCGA-AB-2857-03A	NO	white				Poor	54	25.17.0	Washington University	TCGA-AB-2857			YES	9	0		FBEEB2A6-4B45-47FF-8B34-C0E165F6B80C	YES	23	YES	NO	No	NO		YES	4	30	21	3	0	100	1	55	1	0	14	0	0	0		9	2	1	M6	Bone marrow aspirate		12	No
	TCGA-AB-2857-03B	NO	white				Poor	54	25.17.0	Washington University	TCGA-AB-2857			YES	9	0		FBEEB2A6-4B45-47FF-8B34-C0E165F6B80C	YES	23	YES	NO	No	NO		YES	4	30	21	3	0	100	1	55	1	0	14	0	0	0		9	2	1	M6	Bone marrow aspirate		12	No
	TCGA-AB-2857-03C	NO	white				Poor	54	25.17.0	Washington University	TCGA-AB-2857			YES	9	0		FBEEB2A6-4B45-47FF-8B34-C0E165F6B80C	YES	23	YES	NO	No	NO		YES	4	30	21	3	0	100	1	55	1	0	14	0	0	0		9	2	1	M6	Bone marrow aspirate		12	No
	TCGA-AB-2857-11A	NO	white				Poor	54	25.17.0	Washington University	TCGA-AB-2857			YES	9	0		FBEEB2A6-4B45-47FF-8B34-C0E165F6B80C	YES	23	YES	NO	No	NO		YES	4	30	21	3	0	100	1	55	1	0	14	0	0	0		9	2	1	M6	Bone marrow aspirate		12	No
	TCGA-AB-2857-11B	NO	white				Poor	54	25.17.0	Washington University	TCGA-AB-2857			YES	9	0		FBEEB2A6-4B45-47FF-8B34-C0E165F6B80C	YES	23	YES	NO	No	NO		YES	4	30	21	3	0	100	1	55	1	0	14	0	0	0		9	2	1	M6	Bone marrow aspirate		12	No
	TCGA-AB-2857-11C	NO	white				Poor	54	25.17.0	Washington University	TCGA-AB-2857			YES	9	0		FBEEB2A6-4B45-47FF-8B34-C0E165F6B80C	YES	23	YES	NO	No	NO		YES	4	30	21	3	0	100	1	55	1	0	14	0	0	0		9	2	1	M6	Bone marrow aspirate		12	No
	TCGA-AB-2847-03A	NO	white				Intermediate/Normal	53	25.17.0	Washington University	TCGA-AB-2847	0		YES	9	0		D27CA81B-D1D2-44DF-87CA-7F0522D798D9	YES	20	YES	NO	No	NO	0	YES	0	72	0	0	41	30	1	43	0	0	2	0	0	0		9	3	13	M1	Bone marrow aspirate		12	Yes
	TCGA-AB-2847-03B	NO	white				Intermediate/Normal	53	25.17.0	Washington University	TCGA-AB-2847	0		YES	9	0		D27CA81B-D1D2-44DF-87CA-7F0522D798D9	YES	20	YES	NO	No	NO	0	YES	0	72	0	0	41	30	1	43	0	0	2	0	0	0		9	3	13	M1	Bone marrow aspirate		12	Yes
	TCGA-AB-2847-03C	NO	white				Intermediate/Normal	53	25.17.0	Washington University	TCGA-AB-2847	0		YES	9	0		D27CA81B-D1D2-44DF-87CA-7F0522D798D9	YES	20	YES	NO	No	NO	0	YES	0	72	0	0	41	30	1	43	0	0	2	0	0	0		9	3	13	M1	Bone marrow aspirate		12	Yes
	TCGA-AB-2847-03D	NO	white				Intermediate/Normal	53	25.17.0	Washington University	TCGA-AB-2847	0		YES	9	0		D27CA81B-D1D2-44DF-87CA-7F0522D798D9	YES	20	YES	NO	No	NO	0	YES	0	72	0	0	41	30	1	43	0	0	2	0	0	0		9	3	13	M1	Bone marrow aspirate		12	Yes
	TCGA-AB-2847-11A	NO	white				Intermediate/Normal	53	25.17.0	Washington University	TCGA-AB-2847	0		YES	9	0		D27CA81B-D1D2-44DF-87CA-7F0522D798D9	YES	20	YES	NO	No	NO	0	YES	0	72	0	0	41	30	1	43	0	0	2	0	0	0		9	3	13	M1	Bone marrow aspirate		12	Yes
	TCGA-AB-2847-11B	NO	white				Intermediate/Normal	53	25.17.0	Washington University	TCGA-AB-2847	0		YES	9	0		D27CA81B-D1D2-44DF-87CA-7F0522D798D9	YES	20	YES	NO	No	NO	0	YES	0	72	0	0	41	30	1	43	0	0	2	0	0	0		9	3	13	M1	Bone marrow aspirate		12	Yes
	TCGA-AB-2847-11C	NO	white				Intermediate/Normal	53	25.17.0	Washington University	TCGA-AB-2847	0		YES	9	0		D27CA81B-D1D2-44DF-87CA-7F0522D798D9	YES	20	YES	NO	No	NO	0	YES	0	72	0	0	41	30	1	43	0	0	2	0	0	0		9	3	13	M1	Bone marrow aspirate		12	Yes
	TCGA-AB-2847-11D	NO	white				Intermediate/Normal	53	25.17.0	Washington University	TCGA-AB-2847	0		YES	9	0		D27CA81B-D1D2-44DF-87CA-7F0522D798D9	YES	20	YES	NO	No	NO	0	YES	0	72	0	0	41	30	1	43	0	0	2	0	0	0		9	3	13	M1	Bone marrow aspirate		12	Yes
	TCGA-AB-2937-03A	NO	white				Favorable	36	25.17.0	Washington University	TCGA-AB-2937	2000		YES	9	0	RT-PCR	D3C26B0E-1985-4DFF-9CA3-94B2132D3147	YES	20	YES	YES	Yes	YES	3	YES	0	81	0	0	86	80	0	9	0	3	2	0	0	0		9	43	0	M1	Bone marrow aspirate	NO	12	No
	TCGA-AB-2937-11A	NO	white				Favorable	36	25.17.0	Washington University	TCGA-AB-2937	2000		YES	9	0	RT-PCR	D3C26B0E-1985-4DFF-9CA3-94B2132D3147	YES	20	YES	YES	Yes	YES	3	YES	0	81	0	0	86	80	0	9	0	3	2	0	0	0		9	43	0	M1	Bone marrow aspirate	NO	12	No
	TCGA-AB-2955-03A	NO	white				Intermediate/Normal	56	25.17.0	Washington University	TCGA-AB-2955			YES	9	0		74ABBF7B-C38D-4001-85A9-4DBB8B0A64D8	YES	20	NO	NO	No	NO		YES	0	60	0	0	96	80	0	4	0	0	0	0	0	0		10	203	0	M2	Bone marrow aspirate		12	No
	TCGA-AB-2955-11A	NO	white				Intermediate/Normal	56	25.17.0	Washington University	TCGA-AB-2955			YES	9	0		74ABBF7B-C38D-4001-85A9-4DBB8B0A64D8	YES	20	NO	NO	No	NO		YES	0	60	0	0	96	80	0	4	0	0	0	0	0	0		10	203	0	M2	Bone marrow aspirate		12	No
	TCGA-AB-2826-03A	NO	white				Intermediate/Normal	64	25.17.0	Washington University	TCGA-AB-2826	2000		YES	9	0		05D7B807-C742-4B68-9359-B23DA080006A		20			Yes	YES	2	YES	0	72	0	0	90	90	0	8	0	0	2	0	0	0		10	132	0	M4	Bone marrow aspirate		12	No
	TCGA-AB-2826-03B	NO	white				Intermediate/Normal	64	25.17.0	Washington University	TCGA-AB-2826	2000		YES	9	0		05D7B807-C742-4B68-9359-B23DA080006A		20			Yes	YES	2	YES	0	72	0	0	90	90	0	8	0	0	2	0	0	0		10	132	0	M4	Bone marrow aspirate		12	No
	TCGA-AB-2826-11A	NO	white				Intermediate/Normal	64	25.17.0	Washington University	TCGA-AB-2826	2000		YES	9	0		05D7B807-C742-4B68-9359-B23DA080006A		20			Yes	YES	2	YES	0	72	0	0	90	90	0	8	0	0	2	0	0	0		10	132	0	M4	Bone marrow aspirate		12	No
	TCGA-AB-2826-11B	NO	white				Intermediate/Normal	64	25.17.0	Washington University	TCGA-AB-2826	2000		YES	9	0		05D7B807-C742-4B68-9359-B23DA080006A		20			Yes	YES	2	YES	0	72	0	0	90	90	0	8	0	0	2	0	0	0		10	132	0	M4	Bone marrow aspirate		12	No
	TCGA-AB-2826-11C	NO	white				Intermediate/Normal	64	25.17.0	Washington University	TCGA-AB-2826	2000		YES	9	0		05D7B807-C742-4B68-9359-B23DA080006A		20			Yes	YES	2	YES	0	72	0	0	90	90	0	8	0	0	2	0	0	0		10	132	0	M4	Bone marrow aspirate		12	No
	TCGA-AB-2846-03A	NO	white				Favorable	57	25.17.0	Washington University	TCGA-AB-2846			YES	9	0		ADA599EB-1014-4A04-8422-675E668888EE	YES	20	YES	NO	No	NO		YES	4	61	0	0	17	100	3	18	0	0	6	0	0	0		9	14	51	M4	Bone marrow aspirate		12	No
	TCGA-AB-2846-03B	NO	white				Favorable	57	25.17.0	Washington University	TCGA-AB-2846			YES	9	0		ADA599EB-1014-4A04-8422-675E668888EE	YES	20	YES	NO	No	NO		YES	4	61	0	0	17	100	3	18	0	0	6	0	0	0		9	14	51	M4	Bone marrow aspirate		12	No
	TCGA-AB-2846-03C	NO	white				Favorable	57	25.17.0	Washington University	TCGA-AB-2846			YES	9	0		ADA599EB-1014-4A04-8422-675E668888EE	YES	20	YES	NO	No	NO		YES	4	61	0	0	17	100	3	18	0	0	6	0	0	0		9	14	51	M4	Bone marrow aspirate		12	No
	TCGA-AB-2846-11A	NO	white				Favorable	57	25.17.0	Washington University	TCGA-AB-2846			YES	9	0		ADA599EB-1014-4A04-8422-675E668888EE	YES	20	YES	NO	No	NO		YES	4	61	0	0	17	100	3	18	0	0	6	0	0	0		9	14	51	M4	Bone marrow aspirate		12	No
	TCGA-AB-2846-11B	NO	white				Favorable	57	25.17.0	Washington University	TCGA-AB-2846			YES	9	0		ADA599EB-1014-4A04-8422-675E668888EE	YES	20	YES	NO	No	NO		YES	4	61	0	0	17	100	3	18	0	0	6	0	0	0		9	14	51	M4	Bone marrow aspirate		12	No
	TCGA-AB-2846-11D	NO	white				Favorable	57	25.17.0	Washington University	TCGA-AB-2846			YES	9	0		ADA599EB-1014-4A04-8422-675E668888EE	YES	20	YES	NO	No	NO		YES	4	61	0	0	17	100	3	18	0	0	6	0	0	0		9	14	51	M4	Bone marrow aspirate		12	No
	TCGA-AB-2996-03A	NO	white				Intermediate/Normal	74	25.17.0	Washington University	TCGA-AB-2996	0		YES	9	0		82895087-8771-4936-B529-EEBF0A2E370A	NO	20		NO	No	NO	0	YES	0	2	0	0	2	70	0	44	0	0	46	2	0	0		9	3	6	M2	Bone marrow aspirate		12	Yes
	TCGA-AB-2996-11A	NO	white				Intermediate/Normal	74	25.17.0	Washington University	TCGA-AB-2996	0		YES	9	0		82895087-8771-4936-B529-EEBF0A2E370A	NO	20		NO	No	NO	0	YES	0	2	0	0	2	70	0	44	0	0	46	2	0	0		9	3	6	M2	Bone marrow aspirate		12	Yes
	TCGA-AB-2855-03A	NO	white				Poor	18	25.17.0	Washington University	TCGA-AB-2855			YES	9	0		CF0A5C6B-C127-4AC5-905F-18E44B67002F	YES	20	YES	NO	No	NO		YES	0	86	0	0	90	90	0	5	0	0	1	0	0	0		9	35	4	M1	Bone marrow aspirate		12	No
	TCGA-AB-2855-03B	NO	white				Poor	18	25.17.0	Washington University	TCGA-AB-2855			YES	9	0		CF0A5C6B-C127-4AC5-905F-18E44B67002F	YES	20	YES	NO	No	NO		YES	0	86	0	0	90	90	0	5	0	0	1	0	0	0		9	35	4	M1	Bone marrow aspirate		12	No
	TCGA-AB-2855-03C	NO	white				Poor	18	25.17.0	Washington University	TCGA-AB-2855			YES	9	0		CF0A5C6B-C127-4AC5-905F-18E44B67002F	YES	20	YES	NO	No	NO		YES	0	86	0	0	90	90	0	5	0	0	1	0	0	0		9	35	4	M1	Bone marrow aspirate		12	No
	TCGA-AB-2855-11A	NO	white				Poor	18	25.17.0	Washington University	TCGA-AB-2855			YES	9	0		CF0A5C6B-C127-4AC5-905F-18E44B67002F	YES	20	YES	NO	No	NO		YES	0	86	0	0	90	90	0	5	0	0	1	0	0	0		9	35	4	M1	Bone marrow aspirate		12	No
	TCGA-AB-2855-11B	NO	white				Poor	18	25.17.0	Washington University	TCGA-AB-2855			YES	9	0		CF0A5C6B-C127-4AC5-905F-18E44B67002F	YES	20	YES	NO	No	NO		YES	0	86	0	0	90	90	0	5	0	0	1	0	0	0		9	35	4	M1	Bone marrow aspirate		12	No
	TCGA-AB-2808-03A	NO	white				Intermediate/Normal	23	25.17.0	Washington University	TCGA-AB-2808	0		YES	9	0		85C8D6E6-E496-4B52-919F-2467E9A40E02	YES	17	NO	NO	No	NO	0	YES	0	59	21	0	0	70	2	15	0	0	7	0	0	0		7	32	9	M2	Bone marrow aspirate		12	No
	TCGA-AB-2808-03B	NO	white				Intermediate/Normal	23	25.17.0	Washington University	TCGA-AB-2808	0		YES	9	0		85C8D6E6-E496-4B52-919F-2467E9A40E02	YES	17	NO	NO	No	NO	0	YES	0	59	21	0	0	70	2	15	0	0	7	0	0	0		7	32	9	M2	Bone marrow aspirate		12	No
	TCGA-AB-2808-03C	NO	white				Intermediate/Normal	23	25.17.0	Washington University	TCGA-AB-2808	0		YES	9	0		85C8D6E6-E496-4B52-919F-2467E9A40E02	YES	17	NO	NO	No	NO	0	YES	0	59	21	0	0	70	2	15	0	0	7	0	0	0		7	32	9	M2	Bone marrow aspirate		12	No
	TCGA-AB-2808-03D	NO	white				Intermediate/Normal	23	25.17.0	Washington University	TCGA-AB-2808	0		YES	9	0		85C8D6E6-E496-4B52-919F-2467E9A40E02	YES	17	NO	NO	No	NO	0	YES	0	59	21	0	0	70	2	15	0	0	7	0	0	0		7	32	9	M2	Bone marrow aspirate		12	No
	TCGA-AB-2808-11A	NO	white				Intermediate/Normal	23	25.17.0	Washington University	TCGA-AB-2808	0		YES	9	0		85C8D6E6-E496-4B52-919F-2467E9A40E02	YES	17	NO	NO	No	NO	0	YES	0	59	21	0	0	70	2	15	0	0	7	0	0	0		7	32	9	M2	Bone marrow aspirate		12	No
	TCGA-AB-2808-11B	NO	white				Intermediate/Normal	23	25.17.0	Washington University	TCGA-AB-2808	0		YES	9	0		85C8D6E6-E496-4B52-919F-2467E9A40E02	YES	17	NO	NO	No	NO	0	YES	0	59	21	0	0	70	2	15	0	0	7	0	0	0		7	32	9	M2	Bone marrow aspirate		12	No
	TCGA-AB-2808-11C	NO	white				Intermediate/Normal	23	25.17.0	Washington University	TCGA-AB-2808	0		YES	9	0		85C8D6E6-E496-4B52-919F-2467E9A40E02	YES	17	NO	NO	No	NO	0	YES	0	59	21	0	0	70	2	15	0	0	7	0	0	0		7	32	9	M2	Bone marrow aspirate		12	No
	TCGA-AB-2808-11D	NO	white				Intermediate/Normal	23	25.17.0	Washington University	TCGA-AB-2808	0		YES	9	0		85C8D6E6-E496-4B52-919F-2467E9A40E02	YES	17	NO	NO	No	NO	0	YES	0	59	21	0	0	70	2	15	0	0	7	0	0	0		7	32	9	M2	Bone marrow aspirate		12	No
	TCGA-AB-2952-03A	NO	white				Poor	60	25.17.0	Washington University	TCGA-AB-2952			YES	9	0	RT-PCR	AD2C72E9-91F2-449F-BDCB-16C8DC4ED004	YES	20	YES	YES	No	NO		YES	0	62	11	6	29	80	1	9	1	4	22	0	0	0		8	16	14	M1	Bone marrow aspirate	NO	12	No
	TCGA-AB-2952-03B	NO	white				Poor	60	25.17.0	Washington University	TCGA-AB-2952			YES	9	0	RT-PCR	AD2C72E9-91F2-449F-BDCB-16C8DC4ED004	YES	20	YES	YES	No	NO		YES	0	62	11	6	29	80	1	9	1	4	22	0	0	0		8	16	14	M1	Bone marrow aspirate	NO	12	No
	TCGA-AB-2952-11A	NO	white				Poor	60	25.17.0	Washington University	TCGA-AB-2952			YES	9	0	RT-PCR	AD2C72E9-91F2-449F-BDCB-16C8DC4ED004	YES	20	YES	YES	No	NO		YES	0	62	11	6	29	80	1	9	1	4	22	0	0	0		8	16	14	M1	Bone marrow aspirate	NO	12	No
	TCGA-AB-2922-03A	NO	white				Intermediate/Normal	83	25.17.0	Washington University	TCGA-AB-2922	2000		YES	9	0	RT-PCR	CBFA5531-141A-4FFD-AC34-C23E8C362021	YES	20	NO	YES	Yes	YES	1	YES	1	75	2	0	74		0	6	0	0	1	0	12	0		9	78	4	M0 Undifferentiated	Bone marrow aspirate	YES	12	No
	TCGA-AB-2922-11A	NO	white				Intermediate/Normal	83	25.17.0	Washington University	TCGA-AB-2922	2000		YES	9	0	RT-PCR	CBFA5531-141A-4FFD-AC34-C23E8C362021	YES	20	NO	YES	Yes	YES	1	YES	1	75	2	0	74		0	6	0	0	1	0	12	0		9	78	4	M0 Undifferentiated	Bone marrow aspirate	YES	12	No
	TCGA-AB-2894-03A	NO	white				Poor	50	25.17.0	Washington University	TCGA-AB-2894			YES	9	0		431D1EAE-40D4-44E6-952F-9F2AEF44AC75	YES	20	YES	NO	No	NO		YES	5	81	5	0	10	90	2	64	0	3	7	0	0	0		10	7	4	M5	Bone marrow aspirate		12	No
	TCGA-AB-2894-11A	NO	white				Poor	50	25.17.0	Washington University	TCGA-AB-2894			YES	9	0		431D1EAE-40D4-44E6-952F-9F2AEF44AC75	YES	20	YES	NO	No	NO		YES	5	81	5	0	10	90	2	64	0	3	7	0	0	0		10	7	4	M5	Bone marrow aspirate		12	No
	TCGA-AB-2980-03A	NO	white				Favorable	50	25.17.0	Washington University	TCGA-AB-2980			YES	9	0	RT-PCR	D2805C78-A277-4F1D-8CEC-6385620AF154	YES	20	YES	YES	No	NO		YES	2	74	2	0	10	90	0	68	0	0	16	0	0	0		10	1	2	M3	Bone marrow aspirate	YES	12	No
	TCGA-AB-2980-11A	NO	white				Favorable	50	25.17.0	Washington University	TCGA-AB-2980			YES	9	0	RT-PCR	D2805C78-A277-4F1D-8CEC-6385620AF154	YES	20	YES	YES	No	NO		YES	2	74	2	0	10	90	0	68	0	0	16	0	0	0		10	1	2	M3	Bone marrow aspirate	YES	12	No
	TCGA-AB-2997-03A	NO	white				Favorable	25	25.17.0	Washington University	TCGA-AB-2997			YES	9	0	RT-PCR	6BD92CDF-C83A-426C-9F7C-23BB0CB18583	YES	20	YES	YES	No	NO		YES	0	93	3	1	0	90	0	27	0	22	4	0	0	40		9	16	3	M3	Bone marrow aspirate	YES	12	No
	TCGA-AB-2997-03B	NO	white				Favorable	25	25.17.0	Washington University	TCGA-AB-2997			YES	9	0	RT-PCR	6BD92CDF-C83A-426C-9F7C-23BB0CB18583	YES	20	YES	YES	No	NO		YES	0	93	3	1	0	90	0	27	0	22	4	0	0	40		9	16	3	M3	Bone marrow aspirate	YES	12	No
	TCGA-AB-2997-11A	NO	white				Favorable	25	25.17.0	Washington University	TCGA-AB-2997			YES	9	0	RT-PCR	6BD92CDF-C83A-426C-9F7C-23BB0CB18583	YES	20	YES	YES	No	NO		YES	0	93	3	1	0	90	0	27	0	22	4	0	0	40		9	16	3	M3	Bone marrow aspirate	YES	12	No
	TCGA-AB-2939-03A	NO	white				Poor	72	25.17.0	Washington University	TCGA-AB-2939			YES	9	0		F0ABCBA8-AE9D-4E18-86D1-6E586BEDAA5B	YES	20	YES	NO	No	NO		YES	48	88	0	0	18	90	3	23	1	0	6	0	0	0		10	38	1	M1	Bone marrow aspirate		12	Yes
	TCGA-AB-2939-11A	NO	white				Poor	72	25.17.0	Washington University	TCGA-AB-2939			YES	9	0		F0ABCBA8-AE9D-4E18-86D1-6E586BEDAA5B	YES	20	YES	NO	No	NO		YES	48	88	0	0	18	90	3	23	1	0	6	0	0	0		10	38	1	M1	Bone marrow aspirate		12	Yes
	TCGA-AB-2915-03A	NO	white				Poor	73	25.17.0	Washington University	TCGA-AB-2915			YES	9	0	RT-PCR	6982257B-95A4-4F6E-94B1-9452FBEC554C	YES	20	YES	YES	No	NO		YES	0	11	1	0	11	40	0	3	0	0	74	0	0	0		9	15	11	M2	Bone marrow aspirate	YES	12	No
	TCGA-AB-2915-11A	NO	white				Poor	73	25.17.0	Washington University	TCGA-AB-2915			YES	9	0	RT-PCR	6982257B-95A4-4F6E-94B1-9452FBEC554C	YES	20	YES	YES	No	NO		YES	0	11	1	0	11	40	0	3	0	0	74	0	0	0		9	15	11	M2	Bone marrow aspirate	YES	12	No
	TCGA-AB-2909-03A	NO	asian				Intermediate/Normal	22	25.17.0	Washington University	TCGA-AB-2909	0		YES	9	0	RT-PCR	0813FEE3-F900-4379-997A-DAC418A97172	YES	20	NO	YES	No	NO	0	YES	0	94	0	0	94	90	0	4	0	0	2	0	0	0		9	115	0	Not Classified	Bone marrow aspirate	YES	12	No
	TCGA-AB-2909-11A	NO	asian				Intermediate/Normal	22	25.17.0	Washington University	TCGA-AB-2909	0		YES	9	0	RT-PCR	0813FEE3-F900-4379-997A-DAC418A97172	YES	20	NO	YES	No	NO	0	YES	0	94	0	0	94	90	0	4	0	0	2	0	0	0		9	115	0	Not Classified	Bone marrow aspirate	YES	12	No
	TCGA-AB-2899-03A	NO	white				Intermediate/Normal	76	25.17.0	Washington University	TCGA-AB-2899			YES	9	0		53CAC7C0-7114-4093-8A54-1D3511CC0EAA	YES	20	YES	NO	No	NO		YES	3	37	0	2	0	30	0	61	0	0	12	0	0	0		11	3	22	M4	Bone marrow aspirate		12	No
	TCGA-AB-2899-11A	NO	white				Intermediate/Normal	76	25.17.0	Washington University	TCGA-AB-2899			YES	9	0		53CAC7C0-7114-4093-8A54-1D3511CC0EAA	YES	20	YES	NO	No	NO		YES	3	37	0	2	0	30	0	61	0	0	12	0	0	0		11	3	22	M4	Bone marrow aspirate		12	No
	TCGA-AB-2895-03A	NO	white					41	25.17.0	Washington University	TCGA-AB-2895	6000			9	0	RT-PCR	BAD986F7-9FD0-4F47-9681-D7AF2B20D593	YES	0	NO	YES	Yes	YES	2	YES	0	92	2	0	90	90	1	2	0	1	4	0	0	0		12	134	0	M1	Bone marrow aspirate	YES	12	No
	TCGA-AB-2895-11A	NO	white					41	25.17.0	Washington University	TCGA-AB-2895	6000			9	0	RT-PCR	BAD986F7-9FD0-4F47-9681-D7AF2B20D593	YES	0	NO	YES	Yes	YES	2	YES	0	92	2	0	90	90	1	2	0	1	4	0	0	0		12	134	0	M1	Bone marrow aspirate	YES	12	No
	TCGA-AB-2889-03A	NO	white				Favorable	55	25.17.0	Washington University	TCGA-AB-2889			YES	9	0		D4094C77-A907-4BE4-97AF-BD3098E1A916	YES	20	YES	NO	No	NO		YES	1	52	5	0	59	90	0	32	0	0	2	0	0	0		9	31	2	M4	Bone marrow aspirate		12	No
	TCGA-AB-2889-11A	NO	white				Favorable	55	25.17.0	Washington University	TCGA-AB-2889			YES	9	0		D4094C77-A907-4BE4-97AF-BD3098E1A916	YES	20	YES	NO	No	NO		YES	1	52	5	0	59	90	0	32	0	0	2	0	0	0		9	31	2	M4	Bone marrow aspirate		12	No
	TCGA-AB-2949-03A	NO	white				Poor	58	25.17.0	Washington University	TCGA-AB-2949	5000		YES	9	0	RT-PCR	FF901F67-694C-4933-93D3-01B1DC8696C8	YES	20	YES	YES	Yes	YES	2	YES	0	59	1	0	72	85	0	13	1	1	4	0	2	0		10	47	6	M0 Undifferentiated	Bone marrow aspirate	NO	12	No
	TCGA-AB-2949-03B	NO	white				Poor	58	25.17.0	Washington University	TCGA-AB-2949	5000		YES	9	0	RT-PCR	FF901F67-694C-4933-93D3-01B1DC8696C8	YES	20	YES	YES	Yes	YES	2	YES	0	59	1	0	72	85	0	13	1	1	4	0	2	0		10	47	6	M0 Undifferentiated	Bone marrow aspirate	NO	12	No
	TCGA-AB-2949-11A	NO	white				Poor	58	25.17.0	Washington University	TCGA-AB-2949	5000		YES	9	0	RT-PCR	FF901F67-694C-4933-93D3-01B1DC8696C8	YES	20	YES	YES	Yes	YES	2	YES	0	59	1	0	72	85	0	13	1	1	4	0	2	0		10	47	6	M0 Undifferentiated	Bone marrow aspirate	NO	12	No
	TCGA-AB-2810-03A	NO	black or african american					76	25.17.0	Washington University	TCGA-AB-2810	0	No	NO	9	0		CEEF0B1C-572D-4C39-A3E3-57BB698C120C	NO			NO	No	NO	0	YES	0	48	1	0	88	95	0	4	1	3	1	0	0	0		10	62	2	M2	Bone marrow aspirate		12	No
	TCGA-AB-2810-03B	NO	black or african american					76	25.17.0	Washington University	TCGA-AB-2810	0	No	NO	9	0		CEEF0B1C-572D-4C39-A3E3-57BB698C120C	NO			NO	No	NO	0	YES	0	48	1	0	88	95	0	4	1	3	1	0	0	0		10	62	2	M2	Bone marrow aspirate		12	No
	TCGA-AB-2810-03C	NO	black or african american					76	25.17.0	Washington University	TCGA-AB-2810	0	No	NO	9	0		CEEF0B1C-572D-4C39-A3E3-57BB698C120C	NO			NO	No	NO	0	YES	0	48	1	0	88	95	0	4	1	3	1	0	0	0		10	62	2	M2	Bone marrow aspirate		12	No
	TCGA-AB-2810-11A	NO	black or african american					76	25.17.0	Washington University	TCGA-AB-2810	0	No	NO	9	0		CEEF0B1C-572D-4C39-A3E3-57BB698C120C	NO			NO	No	NO	0	YES	0	48	1	0	88	95	0	4	1	3	1	0	0	0		10	62	2	M2	Bone marrow aspirate		12	No
	TCGA-AB-2810-11B	NO	black or african american					76	25.17.0	Washington University	TCGA-AB-2810	0	No	NO	9	0		CEEF0B1C-572D-4C39-A3E3-57BB698C120C	NO			NO	No	NO	0	YES	0	48	1	0	88	95	0	4	1	3	1	0	0	0		10	62	2	M2	Bone marrow aspirate		12	No
	TCGA-AB-2810-11C	NO	black or african american					76	25.17.0	Washington University	TCGA-AB-2810	0	No	NO	9	0		CEEF0B1C-572D-4C39-A3E3-57BB698C120C	NO			NO	No	NO	0	YES	0	48	1	0	88	95	0	4	1	3	1	0	0	0		10	62	2	M2	Bone marrow aspirate		12	No
	TCGA-AB-2891-03A	NO	black or african american				Poor	42	25.17.0	Washington University	TCGA-AB-2891			YES	9	0	RT-PCR	B2C56015-4EA4-4553-862E-2F3A44468BCE	YES	20	YES	YES	No	NO		YES	1	68	3	0	51	80	0	18	0	2	15	0	0	0		12	11	10	M1	Bone marrow aspirate	NO	12	No
	TCGA-AB-2891-11A	NO	black or african american				Poor	42	25.17.0	Washington University	TCGA-AB-2891			YES	9	0	RT-PCR	B2C56015-4EA4-4553-862E-2F3A44468BCE	YES	20	YES	YES	No	NO		YES	1	68	3	0	51	80	0	18	0	2	15	0	0	0		12	11	10	M1	Bone marrow aspirate	NO	12	No
	TCGA-AB-2864-03A	NO	white				Poor	54	25.17.0	Washington University	TCGA-AB-2864			YES	9	0		A1E4FE7D-9423-4537-801B-B5CAB3F1D246	YES	21	YES	NO	No	NO		YES	0	82	0	0	42		0	40	0	0	15	0	0	0		9	2	3	M1	Bone marrow aspirate		12	No
	TCGA-AB-2864-03B	NO	white				Poor	54	25.17.0	Washington University	TCGA-AB-2864			YES	9	0		A1E4FE7D-9423-4537-801B-B5CAB3F1D246	YES	21	YES	NO	No	NO		YES	0	82	0	0	42		0	40	0	0	15	0	0	0		9	2	3	M1	Bone marrow aspirate		12	No
	TCGA-AB-2864-03C	NO	white				Poor	54	25.17.0	Washington University	TCGA-AB-2864			YES	9	0		A1E4FE7D-9423-4537-801B-B5CAB3F1D246	YES	21	YES	NO	No	NO		YES	0	82	0	0	42		0	40	0	0	15	0	0	0		9	2	3	M1	Bone marrow aspirate		12	No
	TCGA-AB-2864-03D	NO	white				Poor	54	25.17.0	Washington University	TCGA-AB-2864			YES	9	0		A1E4FE7D-9423-4537-801B-B5CAB3F1D246	YES	21	YES	NO	No	NO		YES	0	82	0	0	42		0	40	0	0	15	0	0	0		9	2	3	M1	Bone marrow aspirate		12	No
	TCGA-AB-2864-11A	NO	white				Poor	54	25.17.0	Washington University	TCGA-AB-2864			YES	9	0		A1E4FE7D-9423-4537-801B-B5CAB3F1D246	YES	21	YES	NO	No	NO		YES	0	82	0	0	42		0	40	0	0	15	0	0	0		9	2	3	M1	Bone marrow aspirate		12	No
	TCGA-AB-2864-11B	NO	white				Poor	54	25.17.0	Washington University	TCGA-AB-2864			YES	9	0		A1E4FE7D-9423-4537-801B-B5CAB3F1D246	YES	21	YES	NO	No	NO		YES	0	82	0	0	42		0	40	0	0	15	0	0	0		9	2	3	M1	Bone marrow aspirate		12	No
	TCGA-AB-2864-11C	NO	white				Poor	54	25.17.0	Washington University	TCGA-AB-2864			YES	9	0		A1E4FE7D-9423-4537-801B-B5CAB3F1D246	YES	21	YES	NO	No	NO		YES	0	82	0	0	42		0	40	0	0	15	0	0	0		9	2	3	M1	Bone marrow aspirate		12	No
	TCGA-AB-2864-11D	NO	white				Poor	54	25.17.0	Washington University	TCGA-AB-2864			YES	9	0		A1E4FE7D-9423-4537-801B-B5CAB3F1D246	YES	21	YES	NO	No	NO		YES	0	82	0	0	42		0	40	0	0	15	0	0	0		9	2	3	M1	Bone marrow aspirate		12	No
	TCGA-AB-2938-03A	NO	white				Intermediate/Normal	76	25.17.0	Washington University	TCGA-AB-2938			YES	9	0		53A12F47-F1F0-4CDE-8325-6BC942E20B00	YES	20	NO	NO	No	NO		YES	0	33	2	0	6	90	1	28	0	0	50	0	0	0		8	4	13	M7	Bone marrow aspirate		12	No
	TCGA-AB-2938-11A	NO	white				Intermediate/Normal	76	25.17.0	Washington University	TCGA-AB-2938			YES	9	0		53A12F47-F1F0-4CDE-8325-6BC942E20B00	YES	20	NO	NO	No	NO		YES	0	33	2	0	6	90	1	28	0	0	50	0	0	0		8	4	13	M7	Bone marrow aspirate		12	No
	TCGA-AB-2942-03A	NO	white				Favorable	67	25.17.0	Washington University	TCGA-AB-2942			YES	9	0	RT-PCR	3C4A22A6-2047-49DD-B21E-7056384C67E1	YES	20	YES	YES	No	NO		YES	1	69	0	0	61	50	1	13	0	0	4	0	0	0		9	37	20	M4	Bone marrow aspirate	NO	12	No
	TCGA-AB-2942-11A	NO	white				Favorable	67	25.17.0	Washington University	TCGA-AB-2942			YES	9	0	RT-PCR	3C4A22A6-2047-49DD-B21E-7056384C67E1	YES	20	YES	YES	No	NO		YES	1	69	0	0	61	50	1	13	0	0	4	0	0	0		9	37	20	M4	Bone marrow aspirate	NO	12	No
	TCGA-AB-2868-03A	NO	white				Favorable	77	25.17.0	Washington University	TCGA-AB-2868		21	YES	9	0		F1AD8A17-1E82-4CFD-99A3-508A0E4D567E	NO	20		NO	No	NO		YES	0	47	0	0	0	80	0	87	0	0	11	0	0	0		10	2	2	M7	Bone marrow aspirate		12	No
	TCGA-AB-2868-03B	NO	white				Favorable	77	25.17.0	Washington University	TCGA-AB-2868		21	YES	9	0		F1AD8A17-1E82-4CFD-99A3-508A0E4D567E	NO	20		NO	No	NO		YES	0	47	0	0	0	80	0	87	0	0	11	0	0	0		10	2	2	M7	Bone marrow aspirate		12	No
	TCGA-AB-2868-03C	NO	white				Favorable	77	25.17.0	Washington University	TCGA-AB-2868		21	YES	9	0		F1AD8A17-1E82-4CFD-99A3-508A0E4D567E	NO	20		NO	No	NO		YES	0	47	0	0	0	80	0	87	0	0	11	0	0	0		10	2	2	M7	Bone marrow aspirate		12	No
	TCGA-AB-2868-11A	NO	white				Favorable	77	25.17.0	Washington University	TCGA-AB-2868		21	YES	9	0		F1AD8A17-1E82-4CFD-99A3-508A0E4D567E	NO	20		NO	No	NO		YES	0	47	0	0	0	80	0	87	0	0	11	0	0	0		10	2	2	M7	Bone marrow aspirate		12	No
	TCGA-AB-2868-11B	NO	white				Favorable	77	25.17.0	Washington University	TCGA-AB-2868		21	YES	9	0		F1AD8A17-1E82-4CFD-99A3-508A0E4D567E	NO	20		NO	No	NO		YES	0	47	0	0	0	80	0	87	0	0	11	0	0	0		10	2	2	M7	Bone marrow aspirate		12	No
	TCGA-AB-2868-11C	NO	white				Favorable	77	25.17.0	Washington University	TCGA-AB-2868		21	YES	9	0		F1AD8A17-1E82-4CFD-99A3-508A0E4D567E	NO	20		NO	No	NO		YES	0	47	0	0	0	80	0	87	0	0	11	0	0	0		10	2	2	M7	Bone marrow aspirate		12	No
	TCGA-AB-2856-03A	NO	white				Intermediate/Normal	63	25.17.0	Washington University	TCGA-AB-2856			YES	9	0		D2BF8A55-87CA-4112-8EFF-C21F11C8FBDD	YES	20	NO	NO	No	NO		YES	0	82	7	0	39	90	3	11	2	7	16	0	0	6		10	77	9	M4	Bone marrow aspirate		12	No
	TCGA-AB-2856-03B	NO	white				Intermediate/Normal	63	25.17.0	Washington University	TCGA-AB-2856			YES	9	0		D2BF8A55-87CA-4112-8EFF-C21F11C8FBDD	YES	20	NO	NO	No	NO		YES	0	82	7	0	39	90	3	11	2	7	16	0	0	6		10	77	9	M4	Bone marrow aspirate		12	No
	TCGA-AB-2856-11A	NO	white				Intermediate/Normal	63	25.17.0	Washington University	TCGA-AB-2856			YES	9	0		D2BF8A55-87CA-4112-8EFF-C21F11C8FBDD	YES	20	NO	NO	No	NO		YES	0	82	7	0	39	90	3	11	2	7	16	0	0	6		10	77	9	M4	Bone marrow aspirate		12	No
	TCGA-AB-2856-11B	NO	white				Intermediate/Normal	63	25.17.0	Washington University	TCGA-AB-2856			YES	9	0		D2BF8A55-87CA-4112-8EFF-C21F11C8FBDD	YES	20	NO	NO	No	NO		YES	0	82	7	0	39	90	3	11	2	7	16	0	0	6		10	77	9	M4	Bone marrow aspirate		12	No
	TCGA-AB-2856-11C	NO	white				Intermediate/Normal	63	25.17.0	Washington University	TCGA-AB-2856			YES	9	0		D2BF8A55-87CA-4112-8EFF-C21F11C8FBDD	YES	20	NO	NO	No	NO		YES	0	82	7	0	39	90	3	11	2	7	16	0	0	6		10	77	9	M4	Bone marrow aspirate		12	No
	TCGA-AB-2874-03A	NO	white				Poor	59	25.17.0	Washington University	TCGA-AB-2874			YES	9	0	RT-PCR	EDE84E31-3B5E-4C4F-9C10-44CBE0A42CD8	YES	20	YES	YES	No	NO		YES	0	70	2	1	48	80	0	14	0	0	16	0	0	0		11	12	19	M2	Bone marrow aspirate	NO	12	No
	TCGA-AB-2874-11A	NO	white				Poor	59	25.17.0	Washington University	TCGA-AB-2874			YES	9	0	RT-PCR	EDE84E31-3B5E-4C4F-9C10-44CBE0A42CD8	YES	20	YES	YES	No	NO		YES	0	70	2	1	48	80	0	14	0	0	16	0	0	0		11	12	19	M2	Bone marrow aspirate	NO	12	No
	TCGA-AB-2841-03A	NO	white				Favorable	51	25.17.0	Washington University	TCGA-AB-2841		No	YES	9	0		0B03C091-EBC5-4A13-B1CC-D932B4A3607B	YES	20	YES	NO	No	NO		YES	8	93	0	1	40	95	1	27	0	4	7	0	0	14		8	4	6	M3	Bone marrow aspirate		12	No
	TCGA-AB-2841-03B	NO	white				Favorable	51	25.17.0	Washington University	TCGA-AB-2841		No	YES	9	0		0B03C091-EBC5-4A13-B1CC-D932B4A3607B	YES	20	YES	NO	No	NO		YES	8	93	0	1	40	95	1	27	0	4	7	0	0	14		8	4	6	M3	Bone marrow aspirate		12	No
	TCGA-AB-2841-03C	NO	white				Favorable	51	25.17.0	Washington University	TCGA-AB-2841		No	YES	9	0		0B03C091-EBC5-4A13-B1CC-D932B4A3607B	YES	20	YES	NO	No	NO		YES	8	93	0	1	40	95	1	27	0	4	7	0	0	14		8	4	6	M3	Bone marrow aspirate		12	No
	TCGA-AB-2841-11A	NO	white				Favorable	51	25.17.0	Washington University	TCGA-AB-2841		No	YES	9	0		0B03C091-EBC5-4A13-B1CC-D932B4A3607B	YES	20	YES	NO	No	NO		YES	8	93	0	1	40	95	1	27	0	4	7	0	0	14		8	4	6	M3	Bone marrow aspirate		12	No
	TCGA-AB-2841-11B	NO	white				Favorable	51	25.17.0	Washington University	TCGA-AB-2841		No	YES	9	0		0B03C091-EBC5-4A13-B1CC-D932B4A3607B	YES	20	YES	NO	No	NO		YES	8	93	0	1	40	95	1	27	0	4	7	0	0	14		8	4	6	M3	Bone marrow aspirate		12	No
	TCGA-AB-2841-11C	NO	white				Favorable	51	25.17.0	Washington University	TCGA-AB-2841		No	YES	9	0		0B03C091-EBC5-4A13-B1CC-D932B4A3607B	YES	20	YES	NO	No	NO		YES	8	93	0	1	40	95	1	27	0	4	7	0	0	14		8	4	6	M3	Bone marrow aspirate		12	No
	TCGA-AB-2948-03A	NO	white				Intermediate/Normal	67	25.17.0	Washington University	TCGA-AB-2948	2000		YES	9	0	RT-PCR	12741248-3B9D-4C8A-AEE6-FAE93030A2B3	YES	20	NO	YES	Yes	YES	3	YES	1	30	4	0	6	90	0	16	4	5	39	0	0	0		9	26	25	M4	Bone marrow aspirate	NO	12	No
	TCGA-AB-2948-11A	NO	white				Intermediate/Normal	67	25.17.0	Washington University	TCGA-AB-2948	2000		YES	9	0	RT-PCR	12741248-3B9D-4C8A-AEE6-FAE93030A2B3	YES	20	NO	YES	Yes	YES	3	YES	1	30	4	0	6	90	0	16	4	5	39	0	0	0		9	26	25	M4	Bone marrow aspirate	NO	12	No
	TCGA-AB-2805-03A	NO	white				Intermediate/Normal	77	25.17.0	Washington University	TCGA-AB-2805	0	No	YES	9	0		85D8F30B-729B-40E0-A63D-8136B40F5114	NO	20		NO	No	NO	0	YES	0	67	0	0	56	90	0	9	0	0	1	0	0	0		9	92	34	M0 Undifferentiated	Bone marrow aspirate		12	Yes
	TCGA-AB-2805-03B	NO	white				Intermediate/Normal	77	25.17.0	Washington University	TCGA-AB-2805	0	No	YES	9	0		85D8F30B-729B-40E0-A63D-8136B40F5114	NO	20		NO	No	NO	0	YES	0	67	0	0	56	90	0	9	0	0	1	0	0	0		9	92	34	M0 Undifferentiated	Bone marrow aspirate		12	Yes
	TCGA-AB-2805-03C	NO	white				Intermediate/Normal	77	25.17.0	Washington University	TCGA-AB-2805	0	No	YES	9	0		85D8F30B-729B-40E0-A63D-8136B40F5114	NO	20		NO	No	NO	0	YES	0	67	0	0	56	90	0	9	0	0	1	0	0	0		9	92	34	M0 Undifferentiated	Bone marrow aspirate		12	Yes
	TCGA-AB-2805-11A	NO	white				Intermediate/Normal	77	25.17.0	Washington University	TCGA-AB-2805	0	No	YES	9	0		85D8F30B-729B-40E0-A63D-8136B40F5114	NO	20		NO	No	NO	0	YES	0	67	0	0	56	90	0	9	0	0	1	0	0	0		9	92	34	M0 Undifferentiated	Bone marrow aspirate		12	Yes
	TCGA-AB-2805-11B	NO	white				Intermediate/Normal	77	25.17.0	Washington University	TCGA-AB-2805	0	No	YES	9	0		85D8F30B-729B-40E0-A63D-8136B40F5114	NO	20		NO	No	NO	0	YES	0	67	0	0	56	90	0	9	0	0	1	0	0	0		9	92	34	M0 Undifferentiated	Bone marrow aspirate		12	Yes
	TCGA-AB-2805-11C	NO	white				Intermediate/Normal	77	25.17.0	Washington University	TCGA-AB-2805	0	No	YES	9	0		85D8F30B-729B-40E0-A63D-8136B40F5114	NO	20		NO	No	NO	0	YES	0	67	0	0	56	90	0	9	0	0	1	0	0	0		9	92	34	M0 Undifferentiated	Bone marrow aspirate		12	Yes
	TCGA-AB-2835-03A	NO	white				Intermediate/Normal	48	25.17.0	Washington University	TCGA-AB-2835			YES	9	0		3B77E8D0-74F5-4216-98BA-EB672FE0F0E2	NO	20		NO	No	NO		YES	40	83	1	0	3	90	0	6	0	0	4	0	0	1		9	116	45	M5	Bone marrow aspirate		12	No
	TCGA-AB-2835-03B	NO	white				Intermediate/Normal	48	25.17.0	Washington University	TCGA-AB-2835			YES	9	0		3B77E8D0-74F5-4216-98BA-EB672FE0F0E2	NO	20		NO	No	NO		YES	40	83	1	0	3	90	0	6	0	0	4	0	0	1		9	116	45	M5	Bone marrow aspirate		12	No
	TCGA-AB-2835-03C	NO	white				Intermediate/Normal	48	25.17.0	Washington University	TCGA-AB-2835			YES	9	0		3B77E8D0-74F5-4216-98BA-EB672FE0F0E2	NO	20		NO	No	NO		YES	40	83	1	0	3	90	0	6	0	0	4	0	0	1		9	116	45	M5	Bone marrow aspirate		12	No
	TCGA-AB-2835-11A	NO	white				Intermediate/Normal	48	25.17.0	Washington University	TCGA-AB-2835			YES	9	0		3B77E8D0-74F5-4216-98BA-EB672FE0F0E2	NO	20		NO	No	NO		YES	40	83	1	0	3	90	0	6	0	0	4	0	0	1		9	116	45	M5	Bone marrow aspirate		12	No
	TCGA-AB-2835-11B	NO	white				Intermediate/Normal	48	25.17.0	Washington University	TCGA-AB-2835			YES	9	0		3B77E8D0-74F5-4216-98BA-EB672FE0F0E2	NO	20		NO	No	NO		YES	40	83	1	0	3	90	0	6	0	0	4	0	0	1		9	116	45	M5	Bone marrow aspirate		12	No
	TCGA-AB-2835-11C	NO	white				Intermediate/Normal	48	25.17.0	Washington University	TCGA-AB-2835			YES	9	0		3B77E8D0-74F5-4216-98BA-EB672FE0F0E2	NO	20		NO	No	NO		YES	40	83	1	0	3	90	0	6	0	0	4	0	0	1		9	116	45	M5	Bone marrow aspirate		12	No
	TCGA-AB-2884-03A	NO	white				Intermediate/Normal	44	25.17.0	Washington University	TCGA-AB-2884	10000		YES	9	0	RT-PCR	C92848FE-AD7E-460C-BE7F-14310374644D	YES	20	NO	YES	Yes	YES	3	YES	2	86	0	0	17	85	0	27	0	1	10	0	5	0		9	14	38	M1	Bone marrow aspirate	NO	12	No
	TCGA-AB-2884-11A	NO	white				Intermediate/Normal	44	25.17.0	Washington University	TCGA-AB-2884	10000		YES	9	0	RT-PCR	C92848FE-AD7E-460C-BE7F-14310374644D	YES	20	NO	YES	Yes	YES	3	YES	2	86	0	0	17	85	0	27	0	1	10	0	5	0		9	14	38	M1	Bone marrow aspirate	NO	12	No
	TCGA-AB-2950-03A	NO	white				Favorable	34	25.17.0	Washington University	TCGA-AB-2950			YES	9	0	RT-PCR	E07F8EA2-74DC-499A-A9A7-EA1A59131AFC	YES	20	YES	YES	No	NO		YES	2	57	5	0	59	90	0	19	2	5	3	0	0	3		9	14	2	M2	Bone marrow aspirate	NO	12	No
	TCGA-AB-2950-11A	NO	white				Favorable	34	25.17.0	Washington University	TCGA-AB-2950			YES	9	0	RT-PCR	E07F8EA2-74DC-499A-A9A7-EA1A59131AFC	YES	20	YES	YES	No	NO		YES	2	57	5	0	59	90	0	19	2	5	3	0	0	3		9	14	2	M2	Bone marrow aspirate	NO	12	No
	TCGA-AB-2842-03A	NO	white				Intermediate/Normal	65	25.17.0	Washington University	TCGA-AB-2842			YES	9	0		999DCB99-C764-43A1-AF09-4D9018FF2606	NO	20		NO	No	NO		YES	0	95	0	0	0	70	2	57	0	0	35	0	0	0		12	2	6	M4	Bone marrow aspirate		12	No
	TCGA-AB-2842-03B	NO	white				Intermediate/Normal	65	25.17.0	Washington University	TCGA-AB-2842			YES	9	0		999DCB99-C764-43A1-AF09-4D9018FF2606	NO	20		NO	No	NO		YES	0	95	0	0	0	70	2	57	0	0	35	0	0	0		12	2	6	M4	Bone marrow aspirate		12	No
	TCGA-AB-2842-03C	NO	white				Intermediate/Normal	65	25.17.0	Washington University	TCGA-AB-2842			YES	9	0		999DCB99-C764-43A1-AF09-4D9018FF2606	NO	20		NO	No	NO		YES	0	95	0	0	0	70	2	57	0	0	35	0	0	0		12	2	6	M4	Bone marrow aspirate		12	No
	TCGA-AB-2842-11A	NO	white				Intermediate/Normal	65	25.17.0	Washington University	TCGA-AB-2842			YES	9	0		999DCB99-C764-43A1-AF09-4D9018FF2606	NO	20		NO	No	NO		YES	0	95	0	0	0	70	2	57	0	0	35	0	0	0		12	2	6	M4	Bone marrow aspirate		12	No
	TCGA-AB-2842-11B	NO	white				Intermediate/Normal	65	25.17.0	Washington University	TCGA-AB-2842			YES	9	0		999DCB99-C764-43A1-AF09-4D9018FF2606	NO	20		NO	No	NO		YES	0	95	0	0	0	70	2	57	0	0	35	0	0	0		12	2	6	M4	Bone marrow aspirate		12	No
	TCGA-AB-2842-11C	NO	white				Intermediate/Normal	65	25.17.0	Washington University	TCGA-AB-2842			YES	9	0		999DCB99-C764-43A1-AF09-4D9018FF2606	NO	20		NO	No	NO		YES	0	95	0	0	0	70	2	57	0	0	35	0	0	0		12	2	6	M4	Bone marrow aspirate		12	No
	TCGA-AB-2910-03A	NO	white				Intermediate/Normal	61	25.17.0	Washington University	TCGA-AB-2910	2000	Yes	YES	9	0		CF600251-B084-4648-9AB8-47D3A4F1E853	NO	20	NO	NO	Yes	YES	1	YES	0	71	0	0	55	70	0	14	3	1	5	0	0	1		12	35	21	M5	Bone marrow aspirate		12	No
	TCGA-AB-2910-11A	NO	white				Intermediate/Normal	61	25.17.0	Washington University	TCGA-AB-2910	2000	Yes	YES	9	0		CF600251-B084-4648-9AB8-47D3A4F1E853	NO	20	NO	NO	Yes	YES	1	YES	0	71	0	0	55	70	0	14	3	1	5	0	0	1		12	35	21	M5	Bone marrow aspirate		12	No
	TCGA-AB-2985-03A	NO	white				Intermediate/Normal	81	25.17.0	Washington University	TCGA-AB-2985	3000		YES	9	0		872AB8F3-5D37-49FB-9608-F5E2FCCDA273	YES	20	NO	NO	Yes	YES	2	YES	0	53	1	0	7	70	0	20	0	0	1	0	4	0		9	12	67	M5	Bone marrow aspirate		12	No
	TCGA-AB-2985-11A	NO	white				Intermediate/Normal	81	25.17.0	Washington University	TCGA-AB-2985	3000		YES	9	0		872AB8F3-5D37-49FB-9608-F5E2FCCDA273	YES	20	NO	NO	Yes	YES	2	YES	0	53	1	0	7	70	0	20	0	0	1	0	4	0		9	12	67	M5	Bone marrow aspirate		12	No
	TCGA-AB-2865-03A	NO	white				Intermediate/Normal	75	25.17.0	Washington University	TCGA-AB-2865		21	YES	9	0		36F04A6C-47BC-4FE1-A1EB-D24C644029FF	YES	19	YES	NO	No	NO		YES	1	40	4	0	48	90	0	23	0	0	20	0	0	0		9	6	4	M1	Bone marrow aspirate		12	No
	TCGA-AB-2865-03B	NO	white				Intermediate/Normal	75	25.17.0	Washington University	TCGA-AB-2865		21	YES	9	0		36F04A6C-47BC-4FE1-A1EB-D24C644029FF	YES	19	YES	NO	No	NO		YES	1	40	4	0	48	90	0	23	0	0	20	0	0	0		9	6	4	M1	Bone marrow aspirate		12	No
	TCGA-AB-2865-03C	NO	white				Intermediate/Normal	75	25.17.0	Washington University	TCGA-AB-2865		21	YES	9	0		36F04A6C-47BC-4FE1-A1EB-D24C644029FF	YES	19	YES	NO	No	NO		YES	1	40	4	0	48	90	0	23	0	0	20	0	0	0		9	6	4	M1	Bone marrow aspirate		12	No
	TCGA-AB-2865-11A	NO	white				Intermediate/Normal	75	25.17.0	Washington University	TCGA-AB-2865		21	YES	9	0		36F04A6C-47BC-4FE1-A1EB-D24C644029FF	YES	19	YES	NO	No	NO		YES	1	40	4	0	48	90	0	23	0	0	20	0	0	0		9	6	4	M1	Bone marrow aspirate		12	No
	TCGA-AB-2865-11B	NO	white				Intermediate/Normal	75	25.17.0	Washington University	TCGA-AB-2865		21	YES	9	0		36F04A6C-47BC-4FE1-A1EB-D24C644029FF	YES	19	YES	NO	No	NO		YES	1	40	4	0	48	90	0	23	0	0	20	0	0	0		9	6	4	M1	Bone marrow aspirate		12	No
	TCGA-AB-2865-11C	NO	white				Intermediate/Normal	75	25.17.0	Washington University	TCGA-AB-2865		21	YES	9	0		36F04A6C-47BC-4FE1-A1EB-D24C644029FF	YES	19	YES	NO	No	NO		YES	1	40	4	0	48	90	0	23	0	0	20	0	0	0		9	6	4	M1	Bone marrow aspirate		12	No
	TCGA-AB-2845-03A	NO	white				Intermediate/Normal	37	25.17.0	Washington University	TCGA-AB-2845			YES	9	0		AD3B4AD1-0DA7-4056-8FDA-6582DCBE6885	NO	20		NO	No	NO		YES	0	52	0	0	33	90	10	14	0	1	33	0	0	0		9	19	9	M2	Bone marrow aspirate		12	No
	TCGA-AB-2845-03B	NO	white				Intermediate/Normal	37	25.17.0	Washington University	TCGA-AB-2845			YES	9	0		AD3B4AD1-0DA7-4056-8FDA-6582DCBE6885	NO	20		NO	No	NO		YES	0	52	0	0	33	90	10	14	0	1	33	0	0	0		9	19	9	M2	Bone marrow aspirate		12	No
	TCGA-AB-2845-03C	NO	white				Intermediate/Normal	37	25.17.0	Washington University	TCGA-AB-2845			YES	9	0		AD3B4AD1-0DA7-4056-8FDA-6582DCBE6885	NO	20		NO	No	NO		YES	0	52	0	0	33	90	10	14	0	1	33	0	0	0		9	19	9	M2	Bone marrow aspirate		12	No
	TCGA-AB-2845-03D	NO	white				Intermediate/Normal	37	25.17.0	Washington University	TCGA-AB-2845			YES	9	0		AD3B4AD1-0DA7-4056-8FDA-6582DCBE6885	NO	20		NO	No	NO		YES	0	52	0	0	33	90	10	14	0	1	33	0	0	0		9	19	9	M2	Bone marrow aspirate		12	No
	TCGA-AB-2845-11A	NO	white				Intermediate/Normal	37	25.17.0	Washington University	TCGA-AB-2845			YES	9	0		AD3B4AD1-0DA7-4056-8FDA-6582DCBE6885	NO	20		NO	No	NO		YES	0	52	0	0	33	90	10	14	0	1	33	0	0	0		9	19	9	M2	Bone marrow aspirate		12	No
	TCGA-AB-2845-11B	NO	white				Intermediate/Normal	37	25.17.0	Washington University	TCGA-AB-2845			YES	9	0		AD3B4AD1-0DA7-4056-8FDA-6582DCBE6885	NO	20		NO	No	NO		YES	0	52	0	0	33	90	10	14	0	1	33	0	0	0		9	19	9	M2	Bone marrow aspirate		12	No
	TCGA-AB-2845-11D	NO	white				Intermediate/Normal	37	25.17.0	Washington University	TCGA-AB-2845			YES	9	0		AD3B4AD1-0DA7-4056-8FDA-6582DCBE6885	NO	20		NO	No	NO		YES	0	52	0	0	33	90	10	14	0	1	33	0	0	0		9	19	9	M2	Bone marrow aspirate		12	No
	TCGA-AB-2991-03A		white				Favorable	40	25.17.0	Washington University	TCGA-AB-2991	0	No	YES	9	0		3DE2FF2F-28A5-4FFC-93E2-744AD93DCE47	YES	20	YES	NO	No	NO	0	YES	0	0	0	0	0	95	0	90	0	0	5	0	0	0		8		5	M3	Bone marrow aspirate		12	No
	TCGA-AB-2991-11A		white				Favorable	40	25.17.0	Washington University	TCGA-AB-2991	0	No	YES	9	0		3DE2FF2F-28A5-4FFC-93E2-744AD93DCE47	YES	20	YES	NO	No	NO	0	YES	0	0	0	0	0	95	0	90	0	0	5	0	0	0		8		5	M3	Bone marrow aspirate		12	No
	TCGA-AB-2870-03A	NO	white				Favorable	76	25.17.0	Washington University	TCGA-AB-2870	6000		YES	9	0	RT-PCR	9628C414-6A8E-469C-99A0-165DFD1728EC	YES	20	YES	YES	Yes	YES	3	YES	0	73	0	0	55	90	0	16	0	0	5	0	3	0		8	34	21	M1	Bone marrow aspirate	NO	12	No
	TCGA-AB-2870-11A	NO	white				Favorable	76	25.17.0	Washington University	TCGA-AB-2870	6000		YES	9	0	RT-PCR	9628C414-6A8E-469C-99A0-165DFD1728EC	YES	20	YES	YES	Yes	YES	3	YES	0	73	0	0	55	90	0	16	0	0	5	0	3	0		8	34	21	M1	Bone marrow aspirate	NO	12	No
	TCGA-AB-2824-03A	NO	white				Intermediate/Normal	45	25.17.0	Washington University	TCGA-AB-2824			YES	9	0		F6E5C4BC-BBD0-4C99-A935-F2ECFEBA0910	NO			NO	No	NO		YES	0	74	0	1	5	90	0	33	0	1	37	0	0	0		8	9	23	M5	Bone marrow aspirate		12	No
	TCGA-AB-2824-03B	NO	white				Intermediate/Normal	45	25.17.0	Washington University	TCGA-AB-2824			YES	9	0		F6E5C4BC-BBD0-4C99-A935-F2ECFEBA0910	NO			NO	No	NO		YES	0	74	0	1	5	90	0	33	0	1	37	0	0	0		8	9	23	M5	Bone marrow aspirate		12	No
	TCGA-AB-2824-03C	NO	white				Intermediate/Normal	45	25.17.0	Washington University	TCGA-AB-2824			YES	9	0		F6E5C4BC-BBD0-4C99-A935-F2ECFEBA0910	NO			NO	No	NO		YES	0	74	0	1	5	90	0	33	0	1	37	0	0	0		8	9	23	M5	Bone marrow aspirate		12	No
	TCGA-AB-2824-11A	NO	white				Intermediate/Normal	45	25.17.0	Washington University	TCGA-AB-2824			YES	9	0		F6E5C4BC-BBD0-4C99-A935-F2ECFEBA0910	NO			NO	No	NO		YES	0	74	0	1	5	90	0	33	0	1	37	0	0	0		8	9	23	M5	Bone marrow aspirate		12	No
	TCGA-AB-2824-11B	NO	white				Intermediate/Normal	45	25.17.0	Washington University	TCGA-AB-2824			YES	9	0		F6E5C4BC-BBD0-4C99-A935-F2ECFEBA0910	NO			NO	No	NO		YES	0	74	0	1	5	90	0	33	0	1	37	0	0	0		8	9	23	M5	Bone marrow aspirate		12	No
	TCGA-AB-2824-11C	NO	white				Intermediate/Normal	45	25.17.0	Washington University	TCGA-AB-2824			YES	9	0		F6E5C4BC-BBD0-4C99-A935-F2ECFEBA0910	NO			NO	No	NO		YES	0	74	0	1	5	90	0	33	0	1	37	0	0	0		8	9	23	M5	Bone marrow aspirate		12	No
	TCGA-AB-2912-03A	NO	white				Poor	63	25.17.0	Washington University	TCGA-AB-2912	2000		YES	9	0	RT-PCR	75F14463-D44F-4DC9-9563-6859DD0F987A	YES	20	YES	YES	Yes	YES	2	YES	1	62	0	0	9	90	0	20	0	3	20	0	9	0		8	18	34	M4	Bone marrow aspirate	NO	12	No
	TCGA-AB-2912-11A	NO	white				Poor	63	25.17.0	Washington University	TCGA-AB-2912	2000		YES	9	0	RT-PCR	75F14463-D44F-4DC9-9563-6859DD0F987A	YES	20	YES	YES	Yes	YES	2	YES	1	62	0	0	9	90	0	20	0	3	20	0	9	0		8	18	34	M4	Bone marrow aspirate	NO	12	No
	TCGA-AB-2903-03A	NO	white				Intermediate/Normal	76	25.17.0	Washington University	TCGA-AB-2903	4000		YES	9	0		52F2B2FF-25A4-4CDB-99F7-7444EC11F39E	YES	20	NO	NO	Yes	YES	2	YES	0	99	0	0	98	90	0	1	0	0	1	0	0	0		11	297	0	M1	Bone marrow aspirate		12	No
	TCGA-AB-2903-11A	NO	white				Intermediate/Normal	76	25.17.0	Washington University	TCGA-AB-2903	4000		YES	9	0		52F2B2FF-25A4-4CDB-99F7-7444EC11F39E	YES	20	NO	NO	Yes	YES	2	YES	0	99	0	0	98	90	0	1	0	0	1	0	0	0		11	297	0	M1	Bone marrow aspirate		12	No
	TCGA-AB-2968-03A	NO	white				Intermediate/Normal	79	25.17.0	Washington University	TCGA-AB-2968			YES	9	0		E16886CB-0A6F-4980-80E6-789641D06490	NO	20		NO	No	NO		YES	0	58	0	0	0	50	0	15	0	0	27	0	0	0		10	19	58	M4	Bone marrow aspirate		12	No
	TCGA-AB-2968-11A	NO	white				Intermediate/Normal	79	25.17.0	Washington University	TCGA-AB-2968			YES	9	0		E16886CB-0A6F-4980-80E6-789641D06490	NO	20		NO	No	NO		YES	0	58	0	0	0	50	0	15	0	0	27	0	0	0		10	19	58	M4	Bone marrow aspirate		12	No
	TCGA-AB-2987-03A	NO	white				Intermediate/Normal	75	25.17.0	Washington University	TCGA-AB-2987	14000		YES	9	0	RT-PCR	B92FC53D-4881-49C3-A6AC-CD7A1FAA6B77	YES	20	NO	YES	Yes	YES	4	YES	0	41	0	1	0	80	0	59	0	0	2	0	0	0		9	7	38	M5	Bone marrow aspirate	NO	12	No
	TCGA-AB-2987-11A	NO	white				Intermediate/Normal	75	25.17.0	Washington University	TCGA-AB-2987	14000		YES	9	0	RT-PCR	B92FC53D-4881-49C3-A6AC-CD7A1FAA6B77	YES	20	NO	YES	Yes	YES	4	YES	0	41	0	1	0	80	0	59	0	0	2	0	0	0		9	7	38	M5	Bone marrow aspirate	NO	12	No
	TCGA-AB-2867-03A	NO	white				Intermediate/Normal	66	25.17.0	Washington University	TCGA-AB-2867			YES	9	0	RT-PCR	895BC15B-763E-4F6A-B3F7-522C7F2B378A	NO	20		YES	No	NO		YES	17	70	0	0	6	50	0	68	0	0	4	0	0	0		12	3	5	M2	Bone marrow aspirate	NO	12	No
	TCGA-AB-2867-03B	NO	white				Intermediate/Normal	66	25.17.0	Washington University	TCGA-AB-2867			YES	9	0	RT-PCR	895BC15B-763E-4F6A-B3F7-522C7F2B378A	NO	20		YES	No	NO		YES	17	70	0	0	6	50	0	68	0	0	4	0	0	0		12	3	5	M2	Bone marrow aspirate	NO	12	No
	TCGA-AB-2867-03C	NO	white				Intermediate/Normal	66	25.17.0	Washington University	TCGA-AB-2867			YES	9	0	RT-PCR	895BC15B-763E-4F6A-B3F7-522C7F2B378A	NO	20		YES	No	NO		YES	17	70	0	0	6	50	0	68	0	0	4	0	0	0		12	3	5	M2	Bone marrow aspirate	NO	12	No
	TCGA-AB-2867-11A	NO	white				Intermediate/Normal	66	25.17.0	Washington University	TCGA-AB-2867			YES	9	0	RT-PCR	895BC15B-763E-4F6A-B3F7-522C7F2B378A	NO	20		YES	No	NO		YES	17	70	0	0	6	50	0	68	0	0	4	0	0	0		12	3	5	M2	Bone marrow aspirate	NO	12	No
	TCGA-AB-2867-11B	NO	white				Intermediate/Normal	66	25.17.0	Washington University	TCGA-AB-2867			YES	9	0	RT-PCR	895BC15B-763E-4F6A-B3F7-522C7F2B378A	NO	20		YES	No	NO		YES	17	70	0	0	6	50	0	68	0	0	4	0	0	0		12	3	5	M2	Bone marrow aspirate	NO	12	No
	TCGA-AB-2867-11C	NO	white				Intermediate/Normal	66	25.17.0	Washington University	TCGA-AB-2867			YES	9	0	RT-PCR	895BC15B-763E-4F6A-B3F7-522C7F2B378A	NO	20		YES	No	NO		YES	17	70	0	0	6	50	0	68	0	0	4	0	0	0		12	3	5	M2	Bone marrow aspirate	NO	12	No
	TCGA-AB-2926-03A	NO	white				Poor	57	25.17.0	Washington University	TCGA-AB-2926			YES	9	0	RT-PCR	EB2B808E-34A8-4AFC-932E-9B6AFEE9BF5A	NO	20		YES	No	NO		YES	0	91	0	0	91	90	0	7	0	0	0	0	0	0		9	20	2	M1	Bone marrow aspirate	YES	12	No
	TCGA-AB-2926-11A	NO	white				Poor	57	25.17.0	Washington University	TCGA-AB-2926			YES	9	0	RT-PCR	EB2B808E-34A8-4AFC-932E-9B6AFEE9BF5A	NO	20		YES	No	NO		YES	0	91	0	0	91	90	0	7	0	0	0	0	0	0		9	20	2	M1	Bone marrow aspirate	YES	12	No
	TCGA-AB-2907-03A	NO	white				Intermediate/Normal	69	25.17.0	Washington University	TCGA-AB-2907			YES	9	0		C891D0BF-FDA6-4F25-B4DD-4EB88EC0C97D	NO	20		NO	No	NO		YES	0	82	0	1	0	40	1	75	0	0	23	0	0	0		8	2	1	M0 Undifferentiated	Bone marrow aspirate		12	No
	TCGA-AB-2907-11A	NO	white				Intermediate/Normal	69	25.17.0	Washington University	TCGA-AB-2907			YES	9	0		C891D0BF-FDA6-4F25-B4DD-4EB88EC0C97D	NO	20		NO	No	NO		YES	0	82	0	1	0	40	1	75	0	0	23	0	0	0		8	2	1	M0 Undifferentiated	Bone marrow aspirate		12	No
	TCGA-AB-2931-03A	NO	white				Intermediate/Normal	75	25.17.0	Washington University	TCGA-AB-2931			YES	9	0	RT-PCR	6F5C6A2B-AE92-442A-B68F-00C1195D4A58	YES	20	NO	YES	No	NO		YES	3	76	0	0	80	90	0	9	0	0	4	0	0	2		8	98	2	M2	Bone marrow aspirate	YES	12	Yes
	TCGA-AB-2931-11A	NO	white				Intermediate/Normal	75	25.17.0	Washington University	TCGA-AB-2931			YES	9	0	RT-PCR	6F5C6A2B-AE92-442A-B68F-00C1195D4A58	YES	20	NO	YES	No	NO		YES	3	76	0	0	80	90	0	9	0	0	4	0	0	2		8	98	2	M2	Bone marrow aspirate	YES	12	Yes
	TCGA-AB-2814-03A	NO	white				Intermediate/Normal	39	25.17.0	Washington University	TCGA-AB-2814	0		YES	9	0		9865773B-6753-4FF9-8145-8A8429432BC8	YES	20	NO	NO	No	NO	0	YES	16	75	3	0	4	10	0	60	0	0	8	0	0	0		10	2	9	M0 Undifferentiated	Bone marrow aspirate		12	No
	TCGA-AB-2814-03B	NO	white				Intermediate/Normal	39	25.17.0	Washington University	TCGA-AB-2814	0		YES	9	0		9865773B-6753-4FF9-8145-8A8429432BC8	YES	20	NO	NO	No	NO	0	YES	16	75	3	0	4	10	0	60	0	0	8	0	0	0		10	2	9	M0 Undifferentiated	Bone marrow aspirate		12	No
	TCGA-AB-2814-03C	NO	white				Intermediate/Normal	39	25.17.0	Washington University	TCGA-AB-2814	0		YES	9	0		9865773B-6753-4FF9-8145-8A8429432BC8	YES	20	NO	NO	No	NO	0	YES	16	75	3	0	4	10	0	60	0	0	8	0	0	0		10	2	9	M0 Undifferentiated	Bone marrow aspirate		12	No
	TCGA-AB-2814-03D	NO	white				Intermediate/Normal	39	25.17.0	Washington University	TCGA-AB-2814	0		YES	9	0		9865773B-6753-4FF9-8145-8A8429432BC8	YES	20	NO	NO	No	NO	0	YES	16	75	3	0	4	10	0	60	0	0	8	0	0	0		10	2	9	M0 Undifferentiated	Bone marrow aspirate		12	No
	TCGA-AB-2814-11A	NO	white				Intermediate/Normal	39	25.17.0	Washington University	TCGA-AB-2814	0		YES	9	0		9865773B-6753-4FF9-8145-8A8429432BC8	YES	20	NO	NO	No	NO	0	YES	16	75	3	0	4	10	0	60	0	0	8	0	0	0		10	2	9	M0 Undifferentiated	Bone marrow aspirate		12	No
	TCGA-AB-2814-11B	NO	white				Intermediate/Normal	39	25.17.0	Washington University	TCGA-AB-2814	0		YES	9	0		9865773B-6753-4FF9-8145-8A8429432BC8	YES	20	NO	NO	No	NO	0	YES	16	75	3	0	4	10	0	60	0	0	8	0	0	0		10	2	9	M0 Undifferentiated	Bone marrow aspirate		12	No
	TCGA-AB-2814-11C	NO	white				Intermediate/Normal	39	25.17.0	Washington University	TCGA-AB-2814	0		YES	9	0		9865773B-6753-4FF9-8145-8A8429432BC8	YES	20	NO	NO	No	NO	0	YES	16	75	3	0	4	10	0	60	0	0	8	0	0	0		10	2	9	M0 Undifferentiated	Bone marrow aspirate		12	No
	TCGA-AB-2814-11D	NO	white				Intermediate/Normal	39	25.17.0	Washington University	TCGA-AB-2814	0		YES	9	0		9865773B-6753-4FF9-8145-8A8429432BC8	YES	20	NO	NO	No	NO	0	YES	16	75	3	0	4	10	0	60	0	0	8	0	0	0		10	2	9	M0 Undifferentiated	Bone marrow aspirate		12	No
	TCGA-AB-2861-03A	NO	white				Poor	76	25.17.0	Washington University	TCGA-AB-2861			YES	9	0		BED7CF9D-F0F6-4A5B-9859-2EBF131294A1	YES	20	YES	NO	No	NO		YES	2	78	22	0	0	90	2	36	4	1	19	0	0	3		10	4	10	M5	Bone marrow aspirate		12	No
	TCGA-AB-2861-03B	NO	white				Poor	76	25.17.0	Washington University	TCGA-AB-2861			YES	9	0		BED7CF9D-F0F6-4A5B-9859-2EBF131294A1	YES	20	YES	NO	No	NO		YES	2	78	22	0	0	90	2	36	4	1	19	0	0	3		10	4	10	M5	Bone marrow aspirate		12	No
	TCGA-AB-2861-03C	NO	white				Poor	76	25.17.0	Washington University	TCGA-AB-2861			YES	9	0		BED7CF9D-F0F6-4A5B-9859-2EBF131294A1	YES	20	YES	NO	No	NO		YES	2	78	22	0	0	90	2	36	4	1	19	0	0	3		10	4	10	M5	Bone marrow aspirate		12	No
	TCGA-AB-2861-11A	NO	white				Poor	76	25.17.0	Washington University	TCGA-AB-2861			YES	9	0		BED7CF9D-F0F6-4A5B-9859-2EBF131294A1	YES	20	YES	NO	No	NO		YES	2	78	22	0	0	90	2	36	4	1	19	0	0	3		10	4	10	M5	Bone marrow aspirate		12	No
	TCGA-AB-2861-11B	NO	white				Poor	76	25.17.0	Washington University	TCGA-AB-2861			YES	9	0		BED7CF9D-F0F6-4A5B-9859-2EBF131294A1	YES	20	YES	NO	No	NO		YES	2	78	22	0	0	90	2	36	4	1	19	0	0	3		10	4	10	M5	Bone marrow aspirate		12	No
	TCGA-AB-2861-11C	NO	white				Poor	76	25.17.0	Washington University	TCGA-AB-2861			YES	9	0		BED7CF9D-F0F6-4A5B-9859-2EBF131294A1	YES	20	YES	NO	No	NO		YES	2	78	22	0	0	90	2	36	4	1	19	0	0	3		10	4	10	M5	Bone marrow aspirate		12	No
	TCGA-AB-2828-03A	NO	white				Favorable	55	25.17.0	Washington University	TCGA-AB-2828			YES	9	0		35013347-F703-47FF-A877-B63F686CD571	YES	20	YES	NO	No	NO		YES	4	35	1	0	67	95	0	14	1	1	12	0	0	0		8	22	0	M4	Bone marrow aspirate		12	No
	TCGA-AB-2828-03B	NO	white				Favorable	55	25.17.0	Washington University	TCGA-AB-2828			YES	9	0		35013347-F703-47FF-A877-B63F686CD571	YES	20	YES	NO	No	NO		YES	4	35	1	0	67	95	0	14	1	1	12	0	0	0		8	22	0	M4	Bone marrow aspirate		12	No
	TCGA-AB-2828-03C	NO	white				Favorable	55	25.17.0	Washington University	TCGA-AB-2828			YES	9	0		35013347-F703-47FF-A877-B63F686CD571	YES	20	YES	NO	No	NO		YES	4	35	1	0	67	95	0	14	1	1	12	0	0	0		8	22	0	M4	Bone marrow aspirate		12	No
	TCGA-AB-2828-11A	NO	white				Favorable	55	25.17.0	Washington University	TCGA-AB-2828			YES	9	0		35013347-F703-47FF-A877-B63F686CD571	YES	20	YES	NO	No	NO		YES	4	35	1	0	67	95	0	14	1	1	12	0	0	0		8	22	0	M4	Bone marrow aspirate		12	No
	TCGA-AB-2828-11B	NO	white				Favorable	55	25.17.0	Washington University	TCGA-AB-2828			YES	9	0		35013347-F703-47FF-A877-B63F686CD571	YES	20	YES	NO	No	NO		YES	4	35	1	0	67	95	0	14	1	1	12	0	0	0		8	22	0	M4	Bone marrow aspirate		12	No
	TCGA-AB-2828-11C	NO	white				Favorable	55	25.17.0	Washington University	TCGA-AB-2828			YES	9	0		35013347-F703-47FF-A877-B63F686CD571	YES	20	YES	NO	No	NO		YES	4	35	1	0	67	95	0	14	1	1	12	0	0	0		8	22	0	M4	Bone marrow aspirate		12	No
	TCGA-AB-2956-03A	NO	white				Intermediate/Normal	61	25.17.0	Washington University	TCGA-AB-2956	32000		YES	9	0	RT-PCR	096D030E-ADB8-45A2-A4AB-92417AFC502C	YES	20	YES	YES	Yes	YES	2	YES	0	89	0	0	0	90	0	31	0	0	12	0	0	0		7	8	57	M5	Bone marrow aspirate	NO	12	No
	TCGA-AB-2956-11A	NO	white				Intermediate/Normal	61	25.17.0	Washington University	TCGA-AB-2956	32000		YES	9	0	RT-PCR	096D030E-ADB8-45A2-A4AB-92417AFC502C	YES	20	YES	YES	Yes	YES	2	YES	0	89	0	0	0	90	0	31	0	0	12	0	0	0		7	8	57	M5	Bone marrow aspirate	NO	12	No
	TCGA-AB-2940-03A	NO	white				Intermediate/Normal	35	25.17.0	Washington University	TCGA-AB-2940	4000	21	YES	9	0		864633A6-489D-4F21-AEA8-D22506A5E9E8	YES	19	YES	NO	Yes	YES	3	YES	5	34	11	1	40	90	9	15	1	3	3	0	0	3		8	34	9	M2	Bone marrow aspirate		12	No
	TCGA-AB-2940-11A	NO	white				Intermediate/Normal	35	25.17.0	Washington University	TCGA-AB-2940	4000	21	YES	9	0		864633A6-489D-4F21-AEA8-D22506A5E9E8	YES	19	YES	NO	Yes	YES	3	YES	5	34	11	1	40	90	9	15	1	3	3	0	0	3		8	34	9	M2	Bone marrow aspirate		12	No
	TCGA-AB-2936-03A	NO	white				Intermediate/Normal	61	25.17.0	Washington University	TCGA-AB-2936			YES	9	0	RT-PCR	0EBBE6AA-5255-4B23-87C8-A0A905E23237	YES	20	NO	YES	No	NO		YES	0	50	1	0	14	70	1	49	0	0	26	0	0	0		9	2	9	M0 Undifferentiated	Bone marrow aspirate	NO	12	No
	TCGA-AB-2936-11A	NO	white				Intermediate/Normal	61	25.17.0	Washington University	TCGA-AB-2936			YES	9	0	RT-PCR	0EBBE6AA-5255-4B23-87C8-A0A905E23237	YES	20	NO	YES	No	NO		YES	0	50	1	0	14	70	1	49	0	0	26	0	0	0		9	2	9	M0 Undifferentiated	Bone marrow aspirate	NO	12	No
	TCGA-AB-2901-03A	NO	black or african american				Poor	27	25.17.0	Washington University	TCGA-AB-2901	4000	21, 9(9;22)	YES	9	0	RT-PCR	1334763E-E413-41C8-825C-AFCF8D87DC37	YES	20	YES	YES	Yes	YES	1	YES	0	77	0	0	88	100	0	1	0	0	8	0	0	0		9	90	3	M2	Bone marrow aspirate	NO	12	No
	TCGA-AB-2901-11A	NO	black or african american				Poor	27	25.17.0	Washington University	TCGA-AB-2901	4000	21, 9(9;22)	YES	9	0	RT-PCR	1334763E-E413-41C8-825C-AFCF8D87DC37	YES	20	YES	YES	Yes	YES	1	YES	0	77	0	0	88	100	0	1	0	0	8	0	0	0		9	90	3	M2	Bone marrow aspirate	NO	12	No
	TCGA-AB-2879-03A	NO	white				Intermediate/Normal	68	25.17.0	Washington University	TCGA-AB-2879	2000		YES	9	0	RT-PCR	3E0C44B3-EEE8-43BF-8B21-E07D7921700C	YES	20	NO	YES	Yes	YES	2	YES	0	90	1	0	91	70	0	3	0	1	2	0	0	1		9	60	1	M1	Bone marrow aspirate	YES	12	No
	TCGA-AB-2879-11A	NO	white				Intermediate/Normal	68	25.17.0	Washington University	TCGA-AB-2879	2000		YES	9	0	RT-PCR	3E0C44B3-EEE8-43BF-8B21-E07D7921700C	YES	20	NO	YES	Yes	YES	2	YES	0	90	1	0	91	70	0	3	0	1	2	0	0	1		9	60	1	M1	Bone marrow aspirate	YES	12	No
	TCGA-AB-2869-03A	NO	black or african american				Intermediate/Normal	64	25.17.0	Washington University	TCGA-AB-2869	0		YES	9	0	RT-PCR	90FA311D-2063-43D0-8CA4-BBD9245C205F	YES	20	NO	YES	No	NO	0	YES	0	80	0	1	46	95	0	49	0	0	2	0	0	0		10	3	2	M2	Bone marrow aspirate	YES	12	No
	TCGA-AB-2869-11A	NO	black or african american				Intermediate/Normal	64	25.17.0	Washington University	TCGA-AB-2869	0		YES	9	0	RT-PCR	90FA311D-2063-43D0-8CA4-BBD9245C205F	YES	20	NO	YES	No	NO	0	YES	0	80	0	1	46	95	0	49	0	0	2	0	0	0		10	3	2	M2	Bone marrow aspirate	YES	12	No
	TCGA-AB-2833-03A	NO	white				Intermediate/Normal	77	25.17.0	Washington University	TCGA-AB-2833			YES	9	0		CC229D91-E7C7-4E41-BB67-A262D8AE939B	YES	20	NO	NO	No	NO		YES	0	80	0	0	2	70	0	20	0	0	7	0	0	0		10	40	40	M4	Bone marrow aspirate		12	No
	TCGA-AB-2833-03B	NO	white				Intermediate/Normal	77	25.17.0	Washington University	TCGA-AB-2833			YES	9	0		CC229D91-E7C7-4E41-BB67-A262D8AE939B	YES	20	NO	NO	No	NO		YES	0	80	0	0	2	70	0	20	0	0	7	0	0	0		10	40	40	M4	Bone marrow aspirate		12	No
	TCGA-AB-2833-03C	NO	white				Intermediate/Normal	77	25.17.0	Washington University	TCGA-AB-2833			YES	9	0		CC229D91-E7C7-4E41-BB67-A262D8AE939B	YES	20	NO	NO	No	NO		YES	0	80	0	0	2	70	0	20	0	0	7	0	0	0		10	40	40	M4	Bone marrow aspirate		12	No
	TCGA-AB-2833-11A	NO	white				Intermediate/Normal	77	25.17.0	Washington University	TCGA-AB-2833			YES	9	0		CC229D91-E7C7-4E41-BB67-A262D8AE939B	YES	20	NO	NO	No	NO		YES	0	80	0	0	2	70	0	20	0	0	7	0	0	0		10	40	40	M4	Bone marrow aspirate		12	No
	TCGA-AB-2833-11B	NO	white				Intermediate/Normal	77	25.17.0	Washington University	TCGA-AB-2833			YES	9	0		CC229D91-E7C7-4E41-BB67-A262D8AE939B	YES	20	NO	NO	No	NO		YES	0	80	0	0	2	70	0	20	0	0	7	0	0	0		10	40	40	M4	Bone marrow aspirate		12	No
	TCGA-AB-2833-11C	NO	white				Intermediate/Normal	77	25.17.0	Washington University	TCGA-AB-2833			YES	9	0		CC229D91-E7C7-4E41-BB67-A262D8AE939B	YES	20	NO	NO	No	NO		YES	0	80	0	0	2	70	0	20	0	0	7	0	0	0		10	40	40	M4	Bone marrow aspirate		12	No
	TCGA-AB-2866-03A	NO	white				Intermediate/Normal	67	25.17.0	Washington University	TCGA-AB-2866			YES	9	0		C1503BD2-EDB8-4A56-9487-1B3708D768B6	YES	20	NO	NO	No	NO		YES	0	89	1	0	61	90	0	16	0	0	16	0	0	0		10	31	6	M1	Bone marrow aspirate		12	No
	TCGA-AB-2866-03B	NO	white				Intermediate/Normal	67	25.17.0	Washington University	TCGA-AB-2866			YES	9	0		C1503BD2-EDB8-4A56-9487-1B3708D768B6	YES	20	NO	NO	No	NO		YES	0	89	1	0	61	90	0	16	0	0	16	0	0	0		10	31	6	M1	Bone marrow aspirate		12	No
	TCGA-AB-2866-03C	NO	white				Intermediate/Normal	67	25.17.0	Washington University	TCGA-AB-2866			YES	9	0		C1503BD2-EDB8-4A56-9487-1B3708D768B6	YES	20	NO	NO	No	NO		YES	0	89	1	0	61	90	0	16	0	0	16	0	0	0		10	31	6	M1	Bone marrow aspirate		12	No
	TCGA-AB-2866-11A	NO	white				Intermediate/Normal	67	25.17.0	Washington University	TCGA-AB-2866			YES	9	0		C1503BD2-EDB8-4A56-9487-1B3708D768B6	YES	20	NO	NO	No	NO		YES	0	89	1	0	61	90	0	16	0	0	16	0	0	0		10	31	6	M1	Bone marrow aspirate		12	No
	TCGA-AB-2866-11B	NO	white				Intermediate/Normal	67	25.17.0	Washington University	TCGA-AB-2866			YES	9	0		C1503BD2-EDB8-4A56-9487-1B3708D768B6	YES	20	NO	NO	No	NO		YES	0	89	1	0	61	90	0	16	0	0	16	0	0	0		10	31	6	M1	Bone marrow aspirate		12	No
	TCGA-AB-2866-11C	NO	white				Intermediate/Normal	67	25.17.0	Washington University	TCGA-AB-2866			YES	9	0		C1503BD2-EDB8-4A56-9487-1B3708D768B6	YES	20	NO	NO	No	NO		YES	0	89	1	0	61	90	0	16	0	0	16	0	0	0		10	31	6	M1	Bone marrow aspirate		12	No
	TCGA-AB-2905-03A	NO	white				Favorable	48	25.17.0	Washington University	TCGA-AB-2905			YES	9	0	RT-PCR	B208CD3B-F700-4C99-8AB5-CD8B0C99C778	YES	20	YES	YES	No	NO		YES	8	65	0	2	0	100	0	56	0	0	4	0	0	28		9	1	2	M3	Bone marrow aspirate	NO	12	No
	TCGA-AB-2905-11A	NO	white				Favorable	48	25.17.0	Washington University	TCGA-AB-2905			YES	9	0	RT-PCR	B208CD3B-F700-4C99-8AB5-CD8B0C99C778	YES	20	YES	YES	No	NO		YES	8	65	0	2	0	100	0	56	0	0	4	0	0	28		9	1	2	M3	Bone marrow aspirate	NO	12	No
	TCGA-AB-2974-03A	NO	white				Intermediate/Normal	67	25.17.0	Washington University	TCGA-AB-2974	2000		YES	9	0	RT-PCR	7C312235-C2A2-43D7-8ACB-5DA98CCD61D1	YES	20	NO	YES	Yes	YES	1	YES	0	85	1	0	3	90	0	26	0	2	3	0	15	0		9	45	47	M5	Bone marrow aspirate	YES	12	Yes
	TCGA-AB-2974-11A	NO	white				Intermediate/Normal	67	25.17.0	Washington University	TCGA-AB-2974	2000		YES	9	0	RT-PCR	7C312235-C2A2-43D7-8ACB-5DA98CCD61D1	YES	20	NO	YES	Yes	YES	1	YES	0	85	1	0	3	90	0	26	0	2	3	0	15	0		9	45	47	M5	Bone marrow aspirate	YES	12	Yes
	TCGA-AB-2880-03A	NO	white				Intermediate/Normal	24	25.17.0	Washington University	TCGA-AB-2880			YES	9	0	RT-PCR	73160029-5EC6-4963-A668-18B9CD157CD4	YES	20	NO	YES	No	NO		YES	0	77	1	0	76	90	0	5	0	0	1	0	12	1		6	224	4	M1	Bone marrow aspirate	YES	12	No
	TCGA-AB-2880-11A	NO	white				Intermediate/Normal	24	25.17.0	Washington University	TCGA-AB-2880			YES	9	0	RT-PCR	73160029-5EC6-4963-A668-18B9CD157CD4	YES	20	NO	YES	No	NO		YES	0	77	1	0	76	90	0	5	0	0	1	0	12	1		6	224	4	M1	Bone marrow aspirate	YES	12	No
	TCGA-AB-2954-03A	NO	white				Intermediate/Normal	55	25.17.0	Washington University	TCGA-AB-2954			YES	9	0		7148BCA1-A985-4E60-B8FE-CD513A8EA4F6	YES	20	YES	NO	No	NO		YES	0	54	0	0	24	90	1	4	0	4	1	0	13	6		9	114	46	M4	Bone marrow aspirate		12	No
	TCGA-AB-2954-11A	NO	white				Intermediate/Normal	55	25.17.0	Washington University	TCGA-AB-2954			YES	9	0		7148BCA1-A985-4E60-B8FE-CD513A8EA4F6	YES	20	YES	NO	No	NO		YES	0	54	0	0	24	90	1	4	0	4	1	0	13	6		9	114	46	M4	Bone marrow aspirate		12	No
	TCGA-AB-2823-03A	NO	white				Favorable	61	25.17.0	Washington University	TCGA-AB-2823			YES	9	0		A9384212-DDD0-44E0-8F3A-E932EE81F4DC	YES	20	YES	NO	No	NO		YES	0	73	2	0	68	80	0	3	0	0	5	0	0	22		12	86	0	M3	Bone marrow aspirate		12	No
	TCGA-AB-2823-03B	NO	white				Favorable	61	25.17.0	Washington University	TCGA-AB-2823			YES	9	0		A9384212-DDD0-44E0-8F3A-E932EE81F4DC	YES	20	YES	NO	No	NO		YES	0	73	2	0	68	80	0	3	0	0	5	0	0	22		12	86	0	M3	Bone marrow aspirate		12	No
	TCGA-AB-2823-03C	NO	white				Favorable	61	25.17.0	Washington University	TCGA-AB-2823			YES	9	0		A9384212-DDD0-44E0-8F3A-E932EE81F4DC	YES	20	YES	NO	No	NO		YES	0	73	2	0	68	80	0	3	0	0	5	0	0	22		12	86	0	M3	Bone marrow aspirate		12	No
	TCGA-AB-2823-11A	NO	white				Favorable	61	25.17.0	Washington University	TCGA-AB-2823			YES	9	0		A9384212-DDD0-44E0-8F3A-E932EE81F4DC	YES	20	YES	NO	No	NO		YES	0	73	2	0	68	80	0	3	0	0	5	0	0	22		12	86	0	M3	Bone marrow aspirate		12	No
	TCGA-AB-2823-11B	NO	white				Favorable	61	25.17.0	Washington University	TCGA-AB-2823			YES	9	0		A9384212-DDD0-44E0-8F3A-E932EE81F4DC	YES	20	YES	NO	No	NO		YES	0	73	2	0	68	80	0	3	0	0	5	0	0	22		12	86	0	M3	Bone marrow aspirate		12	No
	TCGA-AB-2823-11C	NO	white				Favorable	61	25.17.0	Washington University	TCGA-AB-2823			YES	9	0		A9384212-DDD0-44E0-8F3A-E932EE81F4DC	YES	20	YES	NO	No	NO		YES	0	73	2	0	68	80	0	3	0	0	5	0	0	22		12	86	0	M3	Bone marrow aspirate		12	No
	TCGA-AB-2990-03A	NO	white				Intermediate/Normal	51	25.17.0	Washington University	TCGA-AB-2990			YES	9	0	RT-PCR	6DCD6B6F-A23E-4367-9DC1-A6ED6F6062B8	YES	20	NO	YES	No	NO		YES	0	85	1	0	85	90	0	9	0	0	3	0	2	0		10	64	0	M1	Bone marrow aspirate	NO	12	No
	TCGA-AB-2990-03B	NO	white				Intermediate/Normal	51	25.17.0	Washington University	TCGA-AB-2990			YES	9	0	RT-PCR	6DCD6B6F-A23E-4367-9DC1-A6ED6F6062B8	YES	20	NO	YES	No	NO		YES	0	85	1	0	85	90	0	9	0	0	3	0	2	0		10	64	0	M1	Bone marrow aspirate	NO	12	No
	TCGA-AB-2990-11A	NO	white				Intermediate/Normal	51	25.17.0	Washington University	TCGA-AB-2990			YES	9	0	RT-PCR	6DCD6B6F-A23E-4367-9DC1-A6ED6F6062B8	YES	20	NO	YES	No	NO		YES	0	85	1	0	85	90	0	9	0	0	3	0	2	0		10	64	0	M1	Bone marrow aspirate	NO	12	No
	TCGA-AB-2882-03A	NO	white				Poor	73	25.17.0	Washington University	TCGA-AB-2882			YES	9	0		58978E96-BEEB-4C3A-8D50-AFE9D6F6EAEF	NO	20		NO	No	NO		YES	2	37	0	0	16	80	0	54	0	0	20	0	0	0		10	2	8	M2	Bone marrow aspirate		12	No
	TCGA-AB-2882-11A	NO	white				Poor	73	25.17.0	Washington University	TCGA-AB-2882			YES	9	0		58978E96-BEEB-4C3A-8D50-AFE9D6F6EAEF	NO	20		NO	No	NO		YES	2	37	0	0	16	80	0	54	0	0	20	0	0	0		10	2	8	M2	Bone marrow aspirate		12	No
	TCGA-AB-2849-03A	NO	white				Intermediate/Normal	39	25.17.0	Washington University	TCGA-AB-2849			YES	9	0		F6DA15D0-1097-4B33-8C6E-F8D4AB5BF27D	YES	20	YES	NO	No	NO		YES	4	83	4	0	53	90	0	17	1	3	16	0	0	1		10	5	1	M0 Undifferentiated	Bone marrow aspirate		12	No
	TCGA-AB-2849-03B	NO	white				Intermediate/Normal	39	25.17.0	Washington University	TCGA-AB-2849			YES	9	0		F6DA15D0-1097-4B33-8C6E-F8D4AB5BF27D	YES	20	YES	NO	No	NO		YES	4	83	4	0	53	90	0	17	1	3	16	0	0	1		10	5	1	M0 Undifferentiated	Bone marrow aspirate		12	No
	TCGA-AB-2849-03C	NO	white				Intermediate/Normal	39	25.17.0	Washington University	TCGA-AB-2849			YES	9	0		F6DA15D0-1097-4B33-8C6E-F8D4AB5BF27D	YES	20	YES	NO	No	NO		YES	4	83	4	0	53	90	0	17	1	3	16	0	0	1		10	5	1	M0 Undifferentiated	Bone marrow aspirate		12	No
	TCGA-AB-2849-11A	NO	white				Intermediate/Normal	39	25.17.0	Washington University	TCGA-AB-2849			YES	9	0		F6DA15D0-1097-4B33-8C6E-F8D4AB5BF27D	YES	20	YES	NO	No	NO		YES	4	83	4	0	53	90	0	17	1	3	16	0	0	1		10	5	1	M0 Undifferentiated	Bone marrow aspirate		12	No
	TCGA-AB-2849-11B	NO	white				Intermediate/Normal	39	25.17.0	Washington University	TCGA-AB-2849			YES	9	0		F6DA15D0-1097-4B33-8C6E-F8D4AB5BF27D	YES	20	YES	NO	No	NO		YES	4	83	4	0	53	90	0	17	1	3	16	0	0	1		10	5	1	M0 Undifferentiated	Bone marrow aspirate		12	No
	TCGA-AB-2849-11C	NO	white				Intermediate/Normal	39	25.17.0	Washington University	TCGA-AB-2849			YES	9	0		F6DA15D0-1097-4B33-8C6E-F8D4AB5BF27D	YES	20	YES	NO	No	NO		YES	4	83	4	0	53	90	0	17	1	3	16	0	0	1		10	5	1	M0 Undifferentiated	Bone marrow aspirate		12	No
	TCGA-AB-2965-03A	NO	white				Intermediate/Normal	60	25.17.0	Washington University	TCGA-AB-2965	1000		YES	9	0		298D7323-F280-4505-B1AD-D1D881C049D9	NO	20		NO	Yes	YES	1	YES	0	89	0	8	56	90	0	16	1	2	2	0	13	0		8	68	2	M4	Bone marrow aspirate		12	No
	TCGA-AB-2965-11A	NO	white				Intermediate/Normal	60	25.17.0	Washington University	TCGA-AB-2965	1000		YES	9	0		298D7323-F280-4505-B1AD-D1D881C049D9	NO	20		NO	Yes	YES	1	YES	0	89	0	8	56	90	0	16	1	2	2	0	13	0		8	68	2	M4	Bone marrow aspirate		12	No
	TCGA-AB-2819-03A	NO	white				Favorable	52	25.17.0	Washington University	TCGA-AB-2819			YES	9	0		FDE8C395-3409-422D-BB9C-013A9658A260	NO	20		NO	No	NO		YES	0	67	6	0	18	60	0	45	1	0	22	0	0	0		9	4	8	M2	Bone marrow aspirate		12	Yes
	TCGA-AB-2819-03B	NO	white				Favorable	52	25.17.0	Washington University	TCGA-AB-2819			YES	9	0		FDE8C395-3409-422D-BB9C-013A9658A260	NO	20		NO	No	NO		YES	0	67	6	0	18	60	0	45	1	0	22	0	0	0		9	4	8	M2	Bone marrow aspirate		12	Yes
	TCGA-AB-2819-03C	NO	white				Favorable	52	25.17.0	Washington University	TCGA-AB-2819			YES	9	0		FDE8C395-3409-422D-BB9C-013A9658A260	NO	20		NO	No	NO		YES	0	67	6	0	18	60	0	45	1	0	22	0	0	0		9	4	8	M2	Bone marrow aspirate		12	Yes
	TCGA-AB-2819-11A	NO	white				Favorable	52	25.17.0	Washington University	TCGA-AB-2819			YES	9	0		FDE8C395-3409-422D-BB9C-013A9658A260	NO	20		NO	No	NO		YES	0	67	6	0	18	60	0	45	1	0	22	0	0	0		9	4	8	M2	Bone marrow aspirate		12	Yes
	TCGA-AB-2819-11B	NO	white				Favorable	52	25.17.0	Washington University	TCGA-AB-2819			YES	9	0		FDE8C395-3409-422D-BB9C-013A9658A260	NO	20		NO	No	NO		YES	0	67	6	0	18	60	0	45	1	0	22	0	0	0		9	4	8	M2	Bone marrow aspirate		12	Yes
	TCGA-AB-2819-11C	NO	white				Favorable	52	25.17.0	Washington University	TCGA-AB-2819			YES	9	0		FDE8C395-3409-422D-BB9C-013A9658A260	NO	20		NO	No	NO		YES	0	67	6	0	18	60	0	45	1	0	22	0	0	0		9	4	8	M2	Bone marrow aspirate		12	Yes
	TCGA-AB-2917-03A	NO	white				Poor	41	25.17.0	Washington University	TCGA-AB-2917			YES	9	0		9C45AEAF-C907-4EBA-ACC5-20431996A534	NO	21		NO	No	NO		YES	0	42	2	1	74	80	0	3	1	2	6	0	0	2		12	48	9	M0 Undifferentiated	Bone marrow aspirate		12	No
	TCGA-AB-2917-11A	NO	white				Poor	41	25.17.0	Washington University	TCGA-AB-2917			YES	9	0		9C45AEAF-C907-4EBA-ACC5-20431996A534	NO	21		NO	No	NO		YES	0	42	2	1	74	80	0	3	1	2	6	0	0	2		12	48	9	M0 Undifferentiated	Bone marrow aspirate		12	No
	TCGA-AB-2897-03A	YES	white				Favorable	50	25.17.0	Washington University	TCGA-AB-2897			YES	9	0		8AD6FEC7-CF4D-4661-B793-95893CFF592C	YES	20	YES	NO	No	NO		YES	0	90	0	0.4	0	90	0.3	19	0	0	46	0	0	0		10	3	35	M3	Bone marrow aspirate		12	No
	TCGA-AB-2897-11A	YES	white				Favorable	50	25.17.0	Washington University	TCGA-AB-2897			YES	9	0		8AD6FEC7-CF4D-4661-B793-95893CFF592C	YES	20	YES	NO	No	NO		YES	0	90	0	0.4	0	90	0.3	19	0	0	46	0	0	0		10	3	35	M3	Bone marrow aspirate		12	No
	TCGA-AB-2873-03A	NO	white				Intermediate/Normal	51	25.17.0	Washington University	TCGA-AB-2873	12000		YES	9	0	RT-PCR	E73686C0-BBC5-414C-B2D2-CD61710D151F	YES	20	NO	YES	Yes	YES	3	YES	0	57	0	0	0	90	0	21	0	0	20	0	0	0		11	15	59	M5	Bone marrow aspirate	YES	12	No
	TCGA-AB-2873-11A	NO	white				Intermediate/Normal	51	25.17.0	Washington University	TCGA-AB-2873	12000		YES	9	0	RT-PCR	E73686C0-BBC5-414C-B2D2-CD61710D151F	YES	20	NO	YES	Yes	YES	3	YES	0	57	0	0	0	90	0	21	0	0	20	0	0	0		11	15	59	M5	Bone marrow aspirate	YES	12	No
	TCGA-AB-2971-03A	NO	white				Intermediate/Normal	76	25.17.0	Washington University	TCGA-AB-2971			YES	9	0	RT-PCR	8F0ADCDD-C313-4124-8348-9A622EDFCB17	YES	20	NO	YES	No	NO		YES	3	91	0	0	16	90	0	32	0	0	4	0	17	0		10	5	27	M4	Bone marrow aspirate	NO	12	No
	TCGA-AB-2971-11A	NO	white				Intermediate/Normal	76	25.17.0	Washington University	TCGA-AB-2971			YES	9	0	RT-PCR	8F0ADCDD-C313-4124-8348-9A622EDFCB17	YES	20	NO	YES	No	NO		YES	3	91	0	0	16	90	0	32	0	0	4	0	17	0		10	5	27	M4	Bone marrow aspirate	NO	12	No
	TCGA-AB-2893-03A	NO	white				Poor	45	25.17.0	Washington University	TCGA-AB-2893			YES	9	0		326A2C64-6911-44F9-B3CD-B6C2959A3757	YES	20	YES	NO	No	NO		YES	0	95	2	0	6	75	0	45	0	0	4	0	8	0		9	5	35	M5	Bone marrow aspirate		12	No
	TCGA-AB-2893-11A	NO	white				Poor	45	25.17.0	Washington University	TCGA-AB-2893			YES	9	0		326A2C64-6911-44F9-B3CD-B6C2959A3757	YES	20	YES	NO	No	NO		YES	0	95	2	0	6	75	0	45	0	0	4	0	8	0		9	5	35	M5	Bone marrow aspirate		12	No
	TCGA-AB-2925-03A	NO	white				Intermediate/Normal	57	25.17.0	Washington University	TCGA-AB-2925			YES	9	0	RT-PCR	3E286601-4A6B-4529-8A25-EFA77859B228	YES	20	NO	YES	No	NO		YES	0	52	8	0	4	90	1	5	6	3	69	0	0	0		10	99	4	M5	Bone marrow aspirate	YES	12	No
	TCGA-AB-2925-11A	NO	white				Intermediate/Normal	57	25.17.0	Washington University	TCGA-AB-2925			YES	9	0	RT-PCR	3E286601-4A6B-4529-8A25-EFA77859B228	YES	20	NO	YES	No	NO		YES	0	52	8	0	4	90	1	5	6	3	69	0	0	0		10	99	4	M5	Bone marrow aspirate	YES	12	No
	TCGA-AB-2843-03A	NO	white				Intermediate/Normal	77	25.17.0	Washington University	TCGA-AB-2843			YES	9	0		B2FFDF16-1270-4EA2-963B-45B0AC259C20	YES	32	YES	NO	No	NO		YES	4	75	1	6	8	95	0	62	0	0	9	1	0	0		9	3	9	M6	Bone marrow aspirate		12	No
	TCGA-AB-2843-03B	NO	white				Intermediate/Normal	77	25.17.0	Washington University	TCGA-AB-2843			YES	9	0		B2FFDF16-1270-4EA2-963B-45B0AC259C20	YES	32	YES	NO	No	NO		YES	4	75	1	6	8	95	0	62	0	0	9	1	0	0		9	3	9	M6	Bone marrow aspirate		12	No
	TCGA-AB-2843-03C	NO	white				Intermediate/Normal	77	25.17.0	Washington University	TCGA-AB-2843			YES	9	0		B2FFDF16-1270-4EA2-963B-45B0AC259C20	YES	32	YES	NO	No	NO		YES	4	75	1	6	8	95	0	62	0	0	9	1	0	0		9	3	9	M6	Bone marrow aspirate		12	No
	TCGA-AB-2843-03D	NO	white				Intermediate/Normal	77	25.17.0	Washington University	TCGA-AB-2843			YES	9	0		B2FFDF16-1270-4EA2-963B-45B0AC259C20	YES	32	YES	NO	No	NO		YES	4	75	1	6	8	95	0	62	0	0	9	1	0	0		9	3	9	M6	Bone marrow aspirate		12	No
	TCGA-AB-2843-11A	NO	white				Intermediate/Normal	77	25.17.0	Washington University	TCGA-AB-2843			YES	9	0		B2FFDF16-1270-4EA2-963B-45B0AC259C20	YES	32	YES	NO	No	NO		YES	4	75	1	6	8	95	0	62	0	0	9	1	0	0		9	3	9	M6	Bone marrow aspirate		12	No
	TCGA-AB-2843-11B	NO	white				Intermediate/Normal	77	25.17.0	Washington University	TCGA-AB-2843			YES	9	0		B2FFDF16-1270-4EA2-963B-45B0AC259C20	YES	32	YES	NO	No	NO		YES	4	75	1	6	8	95	0	62	0	0	9	1	0	0		9	3	9	M6	Bone marrow aspirate		12	No
	TCGA-AB-2843-11C	NO	white				Intermediate/Normal	77	25.17.0	Washington University	TCGA-AB-2843			YES	9	0		B2FFDF16-1270-4EA2-963B-45B0AC259C20	YES	32	YES	NO	No	NO		YES	4	75	1	6	8	95	0	62	0	0	9	1	0	0		9	3	9	M6	Bone marrow aspirate		12	No
	TCGA-AB-2843-11D	NO	white				Intermediate/Normal	77	25.17.0	Washington University	TCGA-AB-2843			YES	9	0		B2FFDF16-1270-4EA2-963B-45B0AC259C20	YES	32	YES	NO	No	NO		YES	4	75	1	6	8	95	0	62	0	0	9	1	0	0		9	3	9	M6	Bone marrow aspirate		12	No
	TCGA-AB-3012-03A	NO	white				Favorable	53	25.17.0	Washington University	TCGA-AB-3012		No	YES	9	0		05A11FE2-AB0C-485B-A04A-43767BE3F258	YES	20	YES	NO	No	NO		YES	1	42	0	0	29	90	1	50	0	2	10	0	0	5		9	1	2	M3	Bone marrow aspirate		12	No
	TCGA-AB-3012-11A	NO	white				Favorable	53	25.17.0	Washington University	TCGA-AB-3012		No	YES	9	0		05A11FE2-AB0C-485B-A04A-43767BE3F258	YES	20	YES	NO	No	NO		YES	1	42	0	0	29	90	1	50	0	2	10	0	0	5		9	1	2	M3	Bone marrow aspirate		12	No
	TCGA-AB-2908-03A	NO	white				Poor	81	25.17.0	Washington University	TCGA-AB-2908	0	21	YES	9	0	RT-PCR	6BCB63F0-ABD8-48FE-993A-CA70EC01936F	YES	20	YES	YES	No	NO	0	YES	5	46	5	4	0	60	0	59	0	2	20	0	0	0		10	2	5	M2	Bone marrow aspirate	NO	12	Yes
	TCGA-AB-2908-11A	NO	white				Poor	81	25.17.0	Washington University	TCGA-AB-2908	0	21	YES	9	0	RT-PCR	6BCB63F0-ABD8-48FE-993A-CA70EC01936F	YES	20	YES	YES	No	NO	0	YES	5	46	5	4	0	60	0	59	0	2	20	0	0	0		10	2	5	M2	Bone marrow aspirate	NO	12	Yes
	TCGA-AB-2934-03A	NO	white				Intermediate/Normal	65	25.17.0	Washington University	TCGA-AB-2934	5000		YES	9	0	RT-PCR	B30B966A-0AFF-4F02-A3FB-C23DDA4030B0	YES	15	NO	YES	Yes	YES	2	YES	0	79	0	0	84	90	0	5	0	0	2	0	0	0		9	68	9	M1	Bone marrow aspirate	YES	12	No
	TCGA-AB-2934-11A	NO	white				Intermediate/Normal	65	25.17.0	Washington University	TCGA-AB-2934	5000		YES	9	0	RT-PCR	B30B966A-0AFF-4F02-A3FB-C23DDA4030B0	YES	15	NO	YES	Yes	YES	2	YES	0	79	0	0	84	90	0	5	0	0	2	0	0	0		9	68	9	M1	Bone marrow aspirate	YES	12	No
	TCGA-AB-2927-03A	NO	white				Intermediate/Normal	88	25.17.0	Washington University	TCGA-AB-2927			YES	9	0		45CBBCDF-EE17-476F-8812-B4677865B5F8	NO	20		NO	No	NO		YES	0	33	0	1	0	10	2	72	0	0	6	0	0	0		10	3	20	M1	Bone marrow aspirate		12	No
	TCGA-AB-2927-11A	NO	white				Intermediate/Normal	88	25.17.0	Washington University	TCGA-AB-2927			YES	9	0		45CBBCDF-EE17-476F-8812-B4677865B5F8	NO	20		NO	No	NO		YES	0	33	0	1	0	10	2	72	0	0	6	0	0	0		10	3	20	M1	Bone marrow aspirate		12	No
	TCGA-AB-2844-03A	NO	white				Intermediate/Normal	63	25.17.0	Washington University	TCGA-AB-2844			YES	9	0		A821D9BB-4F40-4E6C-AB63-D0208393C9EA	YES	20	YES	NO	No	NO		YES	0	80	0	0	71	75	0	20	0	0	9	0	0	0		12	17	0	M2	Bone marrow aspirate		12	No
	TCGA-AB-2844-03B	NO	white				Intermediate/Normal	63	25.17.0	Washington University	TCGA-AB-2844			YES	9	0		A821D9BB-4F40-4E6C-AB63-D0208393C9EA	YES	20	YES	NO	No	NO		YES	0	80	0	0	71	75	0	20	0	0	9	0	0	0		12	17	0	M2	Bone marrow aspirate		12	No
	TCGA-AB-2844-03C	NO	white				Intermediate/Normal	63	25.17.0	Washington University	TCGA-AB-2844			YES	9	0		A821D9BB-4F40-4E6C-AB63-D0208393C9EA	YES	20	YES	NO	No	NO		YES	0	80	0	0	71	75	0	20	0	0	9	0	0	0		12	17	0	M2	Bone marrow aspirate		12	No
	TCGA-AB-2844-11A	NO	white				Intermediate/Normal	63	25.17.0	Washington University	TCGA-AB-2844			YES	9	0		A821D9BB-4F40-4E6C-AB63-D0208393C9EA	YES	20	YES	NO	No	NO		YES	0	80	0	0	71	75	0	20	0	0	9	0	0	0		12	17	0	M2	Bone marrow aspirate		12	No
	TCGA-AB-2844-11B	NO	white				Intermediate/Normal	63	25.17.0	Washington University	TCGA-AB-2844			YES	9	0		A821D9BB-4F40-4E6C-AB63-D0208393C9EA	YES	20	YES	NO	No	NO		YES	0	80	0	0	71	75	0	20	0	0	9	0	0	0		12	17	0	M2	Bone marrow aspirate		12	No
	TCGA-AB-2844-11C	NO	white				Intermediate/Normal	63	25.17.0	Washington University	TCGA-AB-2844			YES	9	0		A821D9BB-4F40-4E6C-AB63-D0208393C9EA	YES	20	YES	NO	No	NO		YES	0	80	0	0	71	75	0	20	0	0	9	0	0	0		12	17	0	M2	Bone marrow aspirate		12	No
	TCGA-AB-2984-03A	NO	white				Intermediate/Normal	38	25.17.0	Washington University	TCGA-AB-2984			YES	9	0		F90A7A6D-8DE5-46DB-9821-B53DA68BFFD6	YES	20	NO	NO	No	NO		YES	0	86	0	1	97	90	0	2	0	0	0	0	0	0		9	40	0	M1	Bone marrow aspirate		12	No
	TCGA-AB-2984-11A	NO	white				Intermediate/Normal	38	25.17.0	Washington University	TCGA-AB-2984			YES	9	0		F90A7A6D-8DE5-46DB-9821-B53DA68BFFD6	YES	20	NO	NO	No	NO		YES	0	86	0	1	97	90	0	2	0	0	0	0	0	0		9	40	0	M1	Bone marrow aspirate		12	No
	TCGA-AB-2935-03A	NO	white				Poor	66	25.17.0	Washington University	TCGA-AB-2935			YES	9	0	RT-PCR	45843C13-E5C5-4834-9449-24702AC5E656	YES	20	YES	YES	No	NO		YES	1	81	8	0	12	40	0	33	3	1	14	0	0	3		8	2	25	M4	Bone marrow aspirate	NO	12	Yes
	TCGA-AB-2935-11A	NO	white				Poor	66	25.17.0	Washington University	TCGA-AB-2935			YES	9	0	RT-PCR	45843C13-E5C5-4834-9449-24702AC5E656	YES	20	YES	YES	No	NO		YES	1	81	8	0	12	40	0	33	3	1	14	0	0	3		8	2	25	M4	Bone marrow aspirate	NO	12	Yes
	TCGA-AB-2989-03A	NO	white				Intermediate/Normal	29	25.17.0	Washington University	TCGA-AB-2989			YES	9	0		1138B524-0A1A-407A-AC53-3D4E5D6A85FB	YES	20	NO		No	NO		YES	1	45	0	0	9	90	1	54	0	0	26	0	3	0		9	2	6	M2	Bone marrow aspirate		12	No
	TCGA-AB-2989-11A	NO	white				Intermediate/Normal	29	25.17.0	Washington University	TCGA-AB-2989			YES	9	0		1138B524-0A1A-407A-AC53-3D4E5D6A85FB	YES	20	NO		No	NO		YES	1	45	0	0	9	90	1	54	0	0	26	0	3	0		9	2	6	M2	Bone marrow aspirate		12	No
	TCGA-AB-2920-03A	NO	white				Poor	44	25.17.0	Washington University	TCGA-AB-2920			YES	9	0	RT-PCR	9A76D392-71EF-4E71-A8C6-2E709B06E31C	YES	20	YES	YES	No	NO		YES	0	39	0	0	83	80	0	11	0	0	4	0	0	0		10	35	2	M2	Bone marrow aspirate	NO	12	No
	TCGA-AB-2920-03B	NO	white				Poor	44	25.17.0	Washington University	TCGA-AB-2920			YES	9	0	RT-PCR	9A76D392-71EF-4E71-A8C6-2E709B06E31C	YES	20	YES	YES	No	NO		YES	0	39	0	0	83	80	0	11	0	0	4	0	0	0		10	35	2	M2	Bone marrow aspirate	NO	12	No
	TCGA-AB-2920-11A	NO	white				Poor	44	25.17.0	Washington University	TCGA-AB-2920			YES	9	0	RT-PCR	9A76D392-71EF-4E71-A8C6-2E709B06E31C	YES	20	YES	YES	No	NO		YES	0	39	0	0	83	80	0	11	0	0	4	0	0	0		10	35	2	M2	Bone marrow aspirate	NO	12	No
	TCGA-AB-2831-03A	NO	white				Intermediate/Normal	59	25.17.0	Washington University	TCGA-AB-2831			YES	9	0		504FD7FC-7605-4696-AF48-5F39252F96CE	YES	20	NO	NO	No	NO		YES	0	61	0	0	12		1	61	0	0	23	0	0	0		12	1	0	M0 Undifferentiated	Bone marrow aspirate		12	No
	TCGA-AB-2831-03B	NO	white				Intermediate/Normal	59	25.17.0	Washington University	TCGA-AB-2831			YES	9	0		504FD7FC-7605-4696-AF48-5F39252F96CE	YES	20	NO	NO	No	NO		YES	0	61	0	0	12		1	61	0	0	23	0	0	0		12	1	0	M0 Undifferentiated	Bone marrow aspirate		12	No
	TCGA-AB-2831-11A	NO	white				Intermediate/Normal	59	25.17.0	Washington University	TCGA-AB-2831			YES	9	0		504FD7FC-7605-4696-AF48-5F39252F96CE	YES	20	NO	NO	No	NO		YES	0	61	0	0	12		1	61	0	0	23	0	0	0		12	1	0	M0 Undifferentiated	Bone marrow aspirate		12	No
	TCGA-AB-2831-11B	NO	white				Intermediate/Normal	59	25.17.0	Washington University	TCGA-AB-2831			YES	9	0		504FD7FC-7605-4696-AF48-5F39252F96CE	YES	20	NO	NO	No	NO		YES	0	61	0	0	12		1	61	0	0	23	0	0	0		12	1	0	M0 Undifferentiated	Bone marrow aspirate		12	No
	TCGA-AB-2831-11C	NO	white				Intermediate/Normal	59	25.17.0	Washington University	TCGA-AB-2831			YES	9	0		504FD7FC-7605-4696-AF48-5F39252F96CE	YES	20	NO	NO	No	NO		YES	0	61	0	0	12		1	61	0	0	23	0	0	0		12	1	0	M0 Undifferentiated	Bone marrow aspirate		12	No
	TCGA-AB-2957-03A	NO	white				Favorable	31	25.17.0	Washington University	TCGA-AB-2957	6000		YES	9	0	RT-PCR	7D18FD1A-9441-48A5-A75A-70CC6B6732D5	YES	20	YES	YES	Yes	YES	2	YES	0	82	0	0	53	80	0	3	0	0	1	0	19	0		11	133	24	M4	Bone marrow aspirate	YES	12	No
	TCGA-AB-2957-11A	NO	white				Favorable	31	25.17.0	Washington University	TCGA-AB-2957	6000		YES	9	0	RT-PCR	7D18FD1A-9441-48A5-A75A-70CC6B6732D5	YES	20	YES	YES	Yes	YES	2	YES	0	82	0	0	53	80	0	3	0	0	1	0	19	0		11	133	24	M4	Bone marrow aspirate	YES	12	No
	TCGA-AB-2896-03A	NO	white				Intermediate/Normal	21	25.17.0	Washington University	TCGA-AB-2896	3000		YES	9	0	RT-PCR	12E366C6-CE09-4BA9-B2DD-F959D138EB58	YES	20	NO	YES	Yes	YES	2	YES	0	90	0	10	72	90	1	6	0	1	1	0	3	2	9		93	4	M5	Bone marrow aspirate	YES	12	No
	TCGA-AB-2896-03B	NO	white				Intermediate/Normal	21	25.17.0	Washington University	TCGA-AB-2896	3000		YES	9	0	RT-PCR	12E366C6-CE09-4BA9-B2DD-F959D138EB58	YES	20	NO	YES	Yes	YES	2	YES	0	90	0	10	72	90	1	6	0	1	1	0	3	2	9		93	4	M5	Bone marrow aspirate	YES	12	No
	TCGA-AB-2896-11A	NO	white				Intermediate/Normal	21	25.17.0	Washington University	TCGA-AB-2896	3000		YES	9	0	RT-PCR	12E366C6-CE09-4BA9-B2DD-F959D138EB58	YES	20	NO	YES	Yes	YES	2	YES	0	90	0	10	72	90	1	6	0	1	1	0	3	2	9		93	4	M5	Bone marrow aspirate	YES	12	No
	TCGA-AB-2930-03A	NO	white				Intermediate/Normal	63	25.17.0	Washington University	TCGA-AB-2930			YES	9	0	RT-PCR	AB4E626A-22A3-437C-839B-08D0734D85CD	YES	20	NO	YES	No	NO		YES	0	72	4	0	49	90	2	18	3	12	7	0	0	0		10	28	5	M2	Bone marrow aspirate	YES	12	No
	TCGA-AB-2930-11A	NO	white				Intermediate/Normal	63	25.17.0	Washington University	TCGA-AB-2930			YES	9	0	RT-PCR	AB4E626A-22A3-437C-839B-08D0734D85CD	YES	20	NO	YES	No	NO		YES	0	72	4	0	49	90	2	18	3	12	7	0	0	0		10	28	5	M2	Bone marrow aspirate	YES	12	No
	TCGA-AB-2994-03A	NO	white				Favorable	25	25.17.0	Washington University	TCGA-AB-2994		No	YES	9	0		70C3CDC4-113A-4AA8-B348-DE710E29F0CD	YES	20	YES	NO	No	NO		YES	1	91	0	2	7	100	1	15	0	4	11	0	0	56		10	8	3	M3	Bone marrow aspirate		12	No
	TCGA-AB-2994-11A	NO	white				Favorable	25	25.17.0	Washington University	TCGA-AB-2994		No	YES	9	0		70C3CDC4-113A-4AA8-B348-DE710E29F0CD	YES	20	YES	NO	No	NO		YES	1	91	0	2	7	100	1	15	0	4	11	0	0	56		10	8	3	M3	Bone marrow aspirate		12	No
	TCGA-AB-2807-03A	NO	white				Intermediate/Normal	68	25.17.0	Washington University	TCGA-AB-2807	0	21	YES	9	0	RT-PCR	F693334F-1CBA-4536-8973-8327DA8C1D9E	NO	25		YES	No	NO	0	YES	4	91	0	0	55	95	0	27	0	1	11	0	0	0		8	3	2	M1	Bone marrow aspirate	NO	12	No
	TCGA-AB-2807-03B	NO	white				Intermediate/Normal	68	25.17.0	Washington University	TCGA-AB-2807	0	21	YES	9	0	RT-PCR	F693334F-1CBA-4536-8973-8327DA8C1D9E	NO	25		YES	No	NO	0	YES	4	91	0	0	55	95	0	27	0	1	11	0	0	0		8	3	2	M1	Bone marrow aspirate	NO	12	No
	TCGA-AB-2807-03C	NO	white				Intermediate/Normal	68	25.17.0	Washington University	TCGA-AB-2807	0	21	YES	9	0	RT-PCR	F693334F-1CBA-4536-8973-8327DA8C1D9E	NO	25		YES	No	NO	0	YES	4	91	0	0	55	95	0	27	0	1	11	0	0	0		8	3	2	M1	Bone marrow aspirate	NO	12	No
	TCGA-AB-2807-03D	NO	white				Intermediate/Normal	68	25.17.0	Washington University	TCGA-AB-2807	0	21	YES	9	0	RT-PCR	F693334F-1CBA-4536-8973-8327DA8C1D9E	NO	25		YES	No	NO	0	YES	4	91	0	0	55	95	0	27	0	1	11	0	0	0		8	3	2	M1	Bone marrow aspirate	NO	12	No
	TCGA-AB-2807-11A	NO	white				Intermediate/Normal	68	25.17.0	Washington University	TCGA-AB-2807	0	21	YES	9	0	RT-PCR	F693334F-1CBA-4536-8973-8327DA8C1D9E	NO	25		YES	No	NO	0	YES	4	91	0	0	55	95	0	27	0	1	11	0	0	0		8	3	2	M1	Bone marrow aspirate	NO	12	No
	TCGA-AB-2807-11B	NO	white				Intermediate/Normal	68	25.17.0	Washington University	TCGA-AB-2807	0	21	YES	9	0	RT-PCR	F693334F-1CBA-4536-8973-8327DA8C1D9E	NO	25		YES	No	NO	0	YES	4	91	0	0	55	95	0	27	0	1	11	0	0	0		8	3	2	M1	Bone marrow aspirate	NO	12	No
	TCGA-AB-2807-11C	NO	white				Intermediate/Normal	68	25.17.0	Washington University	TCGA-AB-2807	0	21	YES	9	0	RT-PCR	F693334F-1CBA-4536-8973-8327DA8C1D9E	NO	25		YES	No	NO	0	YES	4	91	0	0	55	95	0	27	0	1	11	0	0	0		8	3	2	M1	Bone marrow aspirate	NO	12	No
	TCGA-AB-2807-11D	NO	white				Intermediate/Normal	68	25.17.0	Washington University	TCGA-AB-2807	0	21	YES	9	0	RT-PCR	F693334F-1CBA-4536-8973-8327DA8C1D9E	NO	25		YES	No	NO	0	YES	4	91	0	0	55	95	0	27	0	1	11	0	0	0		8	3	2	M1	Bone marrow aspirate	NO	12	No
	TCGA-AB-2830-03A	NO	white				Intermediate/Normal	64	25.17.0	Washington University	TCGA-AB-2830			YES	9	0		15B1E23B-30C1-43A8-8F2B-33B0EC24ABCB	YES	20	NO	NO	No	NO		YES	0	85	0	0	22	90	0	65	0	1	9	0	0	0		11	3	3	M4	Bone marrow aspirate		12	No
	TCGA-AB-2830-03B	NO	white				Intermediate/Normal	64	25.17.0	Washington University	TCGA-AB-2830			YES	9	0		15B1E23B-30C1-43A8-8F2B-33B0EC24ABCB	YES	20	NO	NO	No	NO		YES	0	85	0	0	22	90	0	65	0	1	9	0	0	0		11	3	3	M4	Bone marrow aspirate		12	No
	TCGA-AB-2830-03C	NO	white				Intermediate/Normal	64	25.17.0	Washington University	TCGA-AB-2830			YES	9	0		15B1E23B-30C1-43A8-8F2B-33B0EC24ABCB	YES	20	NO	NO	No	NO		YES	0	85	0	0	22	90	0	65	0	1	9	0	0	0		11	3	3	M4	Bone marrow aspirate		12	No
	TCGA-AB-2830-11A	NO	white				Intermediate/Normal	64	25.17.0	Washington University	TCGA-AB-2830			YES	9	0		15B1E23B-30C1-43A8-8F2B-33B0EC24ABCB	YES	20	NO	NO	No	NO		YES	0	85	0	0	22	90	0	65	0	1	9	0	0	0		11	3	3	M4	Bone marrow aspirate		12	No
	TCGA-AB-2830-11B	NO	white				Intermediate/Normal	64	25.17.0	Washington University	TCGA-AB-2830			YES	9	0		15B1E23B-30C1-43A8-8F2B-33B0EC24ABCB	YES	20	NO	NO	No	NO		YES	0	85	0	0	22	90	0	65	0	1	9	0	0	0		11	3	3	M4	Bone marrow aspirate		12	No
	TCGA-AB-2830-11C	NO	white				Intermediate/Normal	64	25.17.0	Washington University	TCGA-AB-2830			YES	9	0		15B1E23B-30C1-43A8-8F2B-33B0EC24ABCB	YES	20	NO	NO	No	NO		YES	0	85	0	0	22	90	0	65	0	1	9	0	0	0		11	3	3	M4	Bone marrow aspirate		12	No
	TCGA-AB-2977-03A	NO	white				Intermediate/Normal	71	25.17.0	Washington University	TCGA-AB-2977			YES	9	0	RT-PCR	6D1DACA0-2E1B-465F-971B-BF717667264F	YES	20	NO	YES	No	NO		YES	0	70	1	0	67	90	1	14	0	0	2	0	7	0		8	36	8	M2	Bone marrow aspirate	NO	12	No
	TCGA-AB-2977-03B	NO	white				Intermediate/Normal	71	25.17.0	Washington University	TCGA-AB-2977			YES	9	0	RT-PCR	6D1DACA0-2E1B-465F-971B-BF717667264F	YES	20	NO	YES	No	NO		YES	0	70	1	0	67	90	1	14	0	0	2	0	7	0		8	36	8	M2	Bone marrow aspirate	NO	12	No
	TCGA-AB-2977-11A	NO	white				Intermediate/Normal	71	25.17.0	Washington University	TCGA-AB-2977			YES	9	0	RT-PCR	6D1DACA0-2E1B-465F-971B-BF717667264F	YES	20	NO	YES	No	NO		YES	0	70	1	0	67	90	1	14	0	0	2	0	7	0		8	36	8	M2	Bone marrow aspirate	NO	12	No
	TCGA-AB-2892-03A	NO	white				Favorable	42	25.17.0	Washington University	TCGA-AB-2892			YES	9	0		267150CF-9DC7-44AD-8594-74DA07481BBC	YES	20	YES	NO	No	NO		YES	4	40	0	2	16	90	4	20	0	0	12	0	8	0		10	38	34	M4	Bone marrow aspirate		12	No
	TCGA-AB-2892-11A	NO	white				Favorable	42	25.17.0	Washington University	TCGA-AB-2892			YES	9	0		267150CF-9DC7-44AD-8594-74DA07481BBC	YES	20	YES	NO	No	NO		YES	4	40	0	2	16	90	4	20	0	0	12	0	8	0		10	38	34	M4	Bone marrow aspirate		12	No
[truncated: 53 more columns]
